# Supplementary material for: Differences in RNA polymerase II complexes and their interactions with surrounding chromatin on human and cytomegalovirus genomes
Source: Research Square preprint supplement (doi:10.21203/rs.3.rs-912323/v1), 2021-10-08
Supplement: Supplementary file 1 [file 1f2af1b3a067faecfc0cfcd8.xlsx]

## Sheet: Library Statistics
Cell line	Treatment	IP	Actual Sample #	Sample #	Total frags No UMIs	Deduped frags UMI	hg38	hg38 DMSO-treated TSRs	TB40e	TB40e 72 hpi DMSO-treated TSRs	Towne	Towne 96 hpi DMSO-treated TSRs	Ratio virus/hg38 reads
DFF-seq Experiment 0
HeLa	Flavo	NA		0	259878094	NA	259878094	NasCap	NA	NA	NA	NA
DFF-ChIP Experiment 1
MRC5	Flavo Low Salt	GFP-Pol II		1	154115887	NA	154115887	PRO-Cap	NA	NA	NA	NA
HeLa	Flavo Low Salt	H3K4me3		2	134346538	NA	134346538	NasCap	NA	NA	NA	NA
DFF-ChIP Experiment 2
MRC5	Control Low Salt	H3K4me3		1	72834422	NA	72834422	PRO-Cap	NA	NA	NA	NA
MRC5	Flavo Low Salt	H3K4me3		2	66443675	NA	66443675	PRO-Cap	NA	NA	NA	NA
MRC5	Control High Salt	GFP-Pol II		7	79232994	NA	79232994	PRO-Cap	NA	NA	NA	NA
MRC5	Flavo High Salt	GFP-Pol II		8	74809416	NA	74809416	PRO-Cap	NA	NA	NA	NA
DFF-ChIP Experiment 3
HFF	Uninfected Low Salt	H3K4me3		13	NA	134011231	133996789	PRO-Cap	14442	PRO-Cap	NA	NA	0.000107779
HFF	Uninfected Low Salt	Pol II		15	NA	157201638	157187105	PRO-Cap	14533	PRO-Cap	NA	NA	9.24567e-05
HFF	48 hrs TB40e infected Low Salt	H3K4me3		14	NA	155731479	148129377	PRO-Cap	7602102	PRO-Cap	NA	NA	0.0513207
HFF	48 hrs TB40e infected Low Salt	Pol II		16	NA	162632770	153472304	PRO-Cap	9160466	PRO-Cap	NA	NA	0.0596881
DFF-ChIP Experiment 4
HFF	48 hrs TB40e infected Low Salt	Pol II		1	NA	70551289	67131252	PRO-Cap	3420037	PRO-Cap	NA	NA	0.0509455
HFF	48 hrs TB40e infected Low Salt	Pol II triptolide		2	NA	71665592	71163546	PRO-Cap	502046	PRO-Cap	NA	NA	0.00705482
HFF	48 hrs TB40e infected Low Salt	TBP		4	NA	77257554	75331297	PRO-Cap	1926257	PRO-Cap	NA	NA	0.0255705
HFF	48 hrs TB40e infected Low Salt	Pol II Ser5P		5	NA	60509273	59744474	PRO-Cap	764799	PRO-Cap	NA	NA	0.0128012
HFF	48 hrs Towne infected Low Salt	UL87		6	NA	64484001	61762335	PRO-Cap	2721666	PRO-Cap	3708383	PRO-Cap	0.0440668
HFF	48 hrs TB40e infected Low Salt	H3K4me3		7	NA	73447814	72405453	PRO-Cap	1042361	PRO-Cap	NA	NA	0.0143962
HFF	48 hrs TB40e infected Low Salt	H3K36me3		8	NA	68279161	68122582	PRO-Cap	156579	PRO-Cap	NA	NA	0.00229849
DFF-ChIP Experiment 5
HFF	48 hrs Towne infected Low Salt	Pol II Rep1		1	NA	27966122	27793597	PRO-Cap	NA	NA	172525	PRO-Cap	0.00620736
HFF	48 hrs Towne infected Low Salt	Pol II Rep2		1	NA	23502831	23376624	PRO-Cap	NA	NA	126207	PRO-Cap	0.00539885
HFF	48 hrs Towne infected Low Salt	Ser5P Rep1		5	NA	36939096	36817587	PRO-Cap	NA	NA	121509	PRO-Cap	0.0033003
HFF	48 hrs Towne infected Low Salt	Ser5P Rep2		5	NA	32851173	32794225	PRO-Cap	NA	NA	56948	PRO-Cap	0.00173653
HFF	48 hrs Towne infected Low Salt	TBP Rep1		4	NA	27037976	26932769	PRO-Cap	NA	NA	105207	PRO-Cap	0.00390628
HFF	48 hrs Towne infected Low Salt	TBP Rep2		4	NA	18313058	18281156	PRO-Cap	NA	NA	31902	PRO-Cap	0.00174508
HFF	48 hrs Towne infected Low Salt	H3K4me3 Rep1		8	NA	30432567	30394222	PRO-Cap	NA	NA	38345	PRO-Cap	0.00126159
HFF	48 hrs Towne infected Low Salt	H3K4me3 Rep2		8	NA	33531259	33496916	PRO-Cap	NA	NA	34343	PRO-Cap	0.00102526
HFF	48 hrs Towne infected Low Salt	UL87 Rep1		7	NA	18362586	18157172	PRO-Cap	NA	NA	205414	PRO-Cap	0.0113131

## Sheet: Feature Description
Feature	Fragment size	Fragment Center Genomic position	Description
Free Pol II	30-65	+10 to +45	Paused Pol II not abutted to nuc1
Abutted Pol II	140-205	+65 to +140	Paused Pol II abutted to nuc1
Nuc 1	120-175	+65 to +175	Nuc 1
TBP PIC	64-88	-18 to -2	TBP PIC not overlapping with UL87 PIC
UL87 PIC	40-63	-36 to -18	UL87 PIC not overlapping with TBP PIC
PIC + Nuc1	210-250	+50 to +90	TBP PICs connected to nuc1
Note: RNA4.9 has been removed from both Towne and TB40e TSR lists.

## Sheet: Exp4 Host Features
Chromosome	MaxTSS S	MaxTSS E	Genename	Strength	Strand	Abutted: Pol II	Free: Pol II	Engaged: Pol II	TBP PIC: TBP	Nuc1: H3K4me3	Abutted: Ser5P	Free: Ser5P	6	TBP PIC: Ser5P	PIC +1 Nuc: TBP	PIC +1 Nuc: Ser5P	-38 to -19	-38 to -10	-19 to -10
chr9	111631368	111631369	DNAJC25	3050	+	2060	245	2305	36	191	135	4	139	7	58	13	>DNAJC25(+)_GCCAGACGGGACTAGCCGGG	>DNAJC25(+)_GCCAGACGGGACTAGCCGGGCGCGCGGCTGAGTGCTGCAGAATCGCTG	>DNAJC25(+)_GCGCGCGGCTGAGTGCTGCAGAATCGCTG
chr9	111631368	111631369	DNAJC25-GNG10	3050	+	2060	245	2305	36	191	135	4	139	7	58	13	>DNAJC25-GNG10(+)_GCCAGACGGGACTAGCCGGG	>DNAJC25-GNG10(+)_GCCAGACGGGACTAGCCGGGCGCGCGGCTGAGTGCTGCAGAATCGCTG	>DNAJC25-GNG10(+)_GCGCGCGGCTGAGTGCTGCAGAATCGCTG
chr1	16613549	16613550	NBPF1	157	-	1220	186	1406	60	933	121	7	128	17	8	14	>NBPF1(-)_GGGATCCTGAGGAGCCAGTG	>NBPF1(-)_GGGATCCTGAGGAGCCAGTGGGCTGCAGGCGCAGGCGCAGGCGAGGGG	>NBPF1(-)_GGGCTGCAGGCGCAGGCGCAGGCGAGGGG
chr16	1964825	1964826	RPS2	776	-	1004	424	1428	718	188	107	17	124	76	171	33	>RPS2(-)_TGGCGTGCTATAAAAGCTGC	>RPS2(-)_TGGCGTGCTATAAAAGCTGCTTCCCAGTAGGTCTCGTTCTTCTTTTCC	>RPS2(-)_CTTCCCAGTAGGTCTCGTTCTTCTTTTCC
chr6	73521031	73521032	EEF1A1	1795	-	551	900	1451	649	101	70	49	119	68	265	73	>EEF1A1(-)_GAGAACCGTATATAAGTGCA	>EEF1A1(-)_GAGAACCGTATATAAGTGCAGTAGTCGCCGTGAACGTTCTTTTTCGCA	>EEF1A1(-)_AGTAGTCGCCGTGAACGTTCTTTTTCGCA
chr19	3985462	3985463	EEF2	574	-	705	500	1205	681	173	95	14	109	45	352	80	>EEF2(-)_CGTCCGCCTATAAAAAGCTG	>EEF2(-)_CGTCCGCCTATAAAAAGCTGAGTGTTGACGTCAGCGTTCTCTTCCGCC	>EEF2(-)_GAGTGTTGACGTCAGCGTTCTCTTCCGCC
chr16	89560681	89560682	RPL13	174	+	773	257	1030	291	236	100	9	109	69	89	50	>RPL13(+)_CCCTGCTATCATCCCAGAGT	>RPL13(+)_CCCTGCTATCATCCCAGAGTGCATTGCGGGGCCGCTTCCTTTCCGCTC	>RPL13(+)_TGCATTGCGGGGCCGCTTCCTTTCCGCTC
chr12	124914649	124914650	UBC	2906	-	535	712	1247	549	109	81	21	102	49	491	99	>UBC(-)_CGATGATTATATAAGGACGC	>UBC(-)_CGATGATTATATAAGGACGCGCCGGGTGTGGCACAGCTAGTTCCGTCG	>UBC(-)_CGCCGGGTGTGGCACAGCTAGTTCCGTCG
chr19	1438404	1438405	RPS15	74	+	672	156	828	105	214	90	5	95	24	27	10	>RPS15(+)_AGTCTCGCGATAACTGCGCA	>RPS15(+)_AGTCTCGCGATAACTGCGCAGGCGCGGACCAAAGCGATCTCTTCTGAG	>RPS15(+)_AGGCGCGGACCAAAGCGATCTCTTCTGAG
chr9	127451404	127451405	RPL12	322	-	761	727	1488	213	158	67	25	92	38	48	10	>RPL12(-)_TTCCTGCCTATATCTGGCTT	>RPL12(-)_TTCCTGCCTATATCTGGCTTGTCCGCGCGATTTCCGGCCTCTCGGCTT	>RPL12(-)_TGTCCGCGCGATTTCCGGCCTCTCGGCTT
chr5	178204532	178204533	HNRNPAB	830	+	749	631	1380	367	165	70	22	92	26	203	39	>HNRNPAB(+)_CTCCGGCATTATAAAGGGCG	>HNRNPAB(+)_CTCCGGCATTATAAAGGGCGCCACGAGTCGGCATTGTCAGGCGGCGGC	>HNRNPAB(+)_GCCACGAGTCGGCATTGTCAGGCGGCGGC
chr3	184335936	184335937	FAM131A	41	+	169	31	200	0	131	80	12	92	1	0	2	>FAM131A(+)_ACGCGGCGGTCACGCCCCCG	>FAM131A(+)_ACGCGGCGGTCACGCCCCCGCGCTTACGTCACCGGCCCGGTTCCCTCT	>FAM131A(+)_GCGCTTACGTCACCGGCCCGGTTCCCTCT
chr12	6534516	6534517	GAPDH	835	+	705	562	1267	730	136	71	20	91	51	354	78	>GAPDH(+)_CCCGGTTTCTATAAATTGAG	>GAPDH(+)_CCCGGTTTCTATAAATTGAGCCCGCAGCCTCCCGCTTCGCTCTCTGCT	>GAPDH(+)_GCCCGCAGCCTCCCGCTTCGCTCTCTGCT
chr6	16129085	16129086	MYLIP	9066	+	1033	721	1754	129	152	60	25	85	16	48	14	>MYLIP(+)_GGCCGCTATATCAGCAGAGT	>MYLIP(+)_GGCCGCTATATCAGCAGAGTCCCTGTCGCAGCGCAGGCAGTTGGGCTG	>MYLIP(+)_TCCCTGTCGCAGCGCAGGCAGTTGGGCTG
chr7	26200745	26200746	HNRNPA2B1	2974	-	697	797	1494	457	135	62	23	85	36	71	18	>HNRNPA2B1(-)_GAAGGTTCTAGAAAAGCGGC	>HNRNPA2B1(-)_GAAGGTTCTAGAAAAGCGGCGGCAGCGGCTCTAGCGGCAGTAGCAGCA	>HNRNPA2B1(-)_CGGCAGCGGCTCTAGCGGCAGTAGCAGCA
chr10	32056388	32056389	KIF5B	572	-	1219	186	1405	27	203	80	5	85	12	40	30	>KIF5B(-)_CTGTCGCCCAACGGCGGCCT	>KIF5B(-)_CTGTCGCCCAACGGCGGCCTCAGGAGTGATCGGGCAGCAGTCGGCCGG	>KIF5B(-)_TCAGGAGTGATCGGGCAGCAGTCGGCCGG
chr19	15379765	15379766	AKAP8	50	-	187	45	232	15	187	78	6	84	2	1	4	>AKAP8(-)_GCGGAGGTGCGCTGAACGCA	>AKAP8(-)_GCGGAGGTGCGCTGAACGCATGCGTGCTGTGGTCGCCTAGTAAACGGG	>AKAP8(-)_ATGCGTGCTGTGGTCGCCTAGTAAACGGG
chr3	43690937	43690938	ABHD5	76	+	1210	1434	2644	92	150	49	34	83	13	20	8	>ABHD5(+)_TGCGCCGCCTTAAGTGCCGC	>ABHD5(+)_TGCGCCGCCTTAAGTGCCGCGCCAGCCCGGGGCGGCCCAGTCGGCCTG	>ABHD5(+)_CGCCAGCCCGGGGCGGCCCAGTCGGCCTG
chr19	12791485	12791486	JUNB	3312	+	304	1340	1644	828	101	41	41	82	77	84	16	>JUNB(+)_AGCGCGGTATAAAGGCGTGT	>JUNB(+)_AGCGCGGTATAAAGGCGTGTGGCTCAGGCTGAGCGGCTGGGACCTTGA	>JUNB(+)_TGGCTCAGGCTGAGCGGCTGGGACCTTGA
chr11	119095464	119095465	H2AFX	345	-	538	544	1082	825	152	65	17	82	87	205	55	>H2AFX(-)_GGGGGCTTATAAAGGCGGCC	>H2AFX(-)_GGGGGCTTATAAAGGCGGCCTCGCGGCGCGCGCGCGACAGCAGTTACA	>H2AFX(-)_CTCGCGGCGCGCGCGCGACAGCAGTTACA
chr8	56074505	56074506	RPS20	436	-	558	509	1067	651	158	65	17	82	92	229	57	>RPS20(-)_AGCGTGCTATATAAGCGTTG	>RPS20(-)_AGCGTGCTATATAAGCGTTGCTCAAGTCCCACCCCTTTCTTTTTGAGG	>RPS20(-)_GCTCAAGTCCCACCCCTTTCTTTTTGAGG
chr14	103334236	103334237	EIF5	1107	+	840	335	1175	192	165	74	7	81	30	114	34	>EIF5(+)_GGGCCGAGGGTAGCTTGAGC	>EIF5(+)_GGGCCGAGGGTAGCTTGAGCGCGGCGGCGGCGTTGTTCAGTCAGAGCG	>EIF5(+)_CGCGGCGGCGGCGTTGTTCAGTCAGAGCG
chr20	58981274	58981275	NELFCD	141	+	551	93	644	3	267	78	3	81	2	3	7	>NELFCD(+)_GCCCGTCCCCGCCTCGCGCA	>NELFCD(+)_GCCCGTCCCCGCCTCGCGCATGCGCCGCGCTCGCTCGCGGGAGGGCAT	>NELFCD(+)_ATGCGCCGCGCTCGCTCGCGGGAGGGCAT
chr20	34516421	34516422	DYNLRB1	374	+	336	110	446	11	231	71	8	79	11	8	5	>DYNLRB1(+)_AAACCTTTGCGCAGGCGCAG	>DYNLRB1(+)_AAACCTTTGCGCAGGCGCAGAAAGGCACAGGACTCGCTAAGTGTTCGC	>DYNLRB1(+)_GAAAGGCACAGGACTCGCTAAGTGTTCGC
chr6	36594365	36594366	SRSF3	463	+	821	625	1446	1038	149	57	21	78	106	257	54	>SRSF3(+)_GGCGTATAAATAAAGGCGAG	>SRSF3(+)_GGCGTATAAATAAAGGCGAGGAGAAGGCGGTGGTCCGCCATTTCGTGG	>SRSF3(+)_GGAGAAGGCGGTGGTCCGCCATTTCGTGG
chr19	55407787	55407788	UBE2S	857	-	728	521	1249	846	125	64	14	78	113	230	46	>UBE2S(-)_GCGGGCGGTTATAAAGAGGC	>UBE2S(-)_GCGGGCGGTTATAAAGAGGCAGTGGTGCGCGCGCGGCCGGCTCAGTGC	>UBE2S(-)_CAGTGGTGCGCGCGCGGCCGGCTCAGTGC
chr15	75201881	75201882	C15orf39	2134	+	881	328	1209	6	245	59	19	78	12	12	27	>C15orf39(+)_CCCCCGCCCCGCCCCCAGCC	>C15orf39(+)_CCCCCGCCCCGCCCCCAGCCCGCCCCGCCCGGGACCGCAGACGGCGCC	>C15orf39(+)_CCGCCCCGCCCGGGACCGCAGACGGCGCC
chr1	85580760	85580761	CCN1	3904	+	446	647	1093	571	143	45	33	78	49	175	56	>CCN1(+)_CCGGCCCGTATAAAAGGCGG	>CCN1(+)_CCGGCCCGTATAAAAGGCGGGCTCCGGGGCGCCTGGGCAGACCGCGAG	>CCN1(+)_GGCTCCGGGGCGCCTGGGCAGACCGCGAG
chr19	17859921	17859922	RPL18A	139	+	668	134	802	274	211	72	6	78	53	156	50	>RPL18A(+)_GAAGGCCTGGTGAACGGCTG	>RPL18A(+)_GAAGGCCTGGTGAACGGCTGCGCGACAGAGGACACTTCCTTTTGCGGG	>RPL18A(+)_GCGCGACAGAGGACACTTCCTTTTGCGGG
chr5	134845995	134845996	C5orf24	164	+	496	139	635	110	165	70	7	77	26	27	15	>C5orf24(+)_CGCCGCCTCTAACACTACAG	>C5orf24(+)_CGCCGCCTCTAACACTACAGGGTGGTAGCGGCCTCTTCGTACTGCGTC	>C5orf24(+)_GGGTGGTAGCGGCCTCTTCGTACTGCGTC
chr5	179550557	179550558	RUFY1	168	+	877	167	1044	0	183	71	5	76	0	3	9	>RUFY1(+)_CGCCCCCACCCCGCGCCCGC	>RUFY1(+)_CGCCCCCACCCCGCGCCCGCCCGCCCGCTGGGTCACATGACACGGCCA	>RUFY1(+)_CCCGCCCGCTGGGTCACATGACACGGCCA
chr17	81512795	81512796	ACTG1	729	-	379	597	976	435	107	49	27	76	54	148	32	>ACTG1(-)_CCGCTTAAATAACGGCGGGG	>ACTG1(-)_CCGCTTAAATAACGGCGGGGGAGGCCGCGGTCGGTCTCAGTCGCCGCT	>ACTG1(-)_GGAGGCCGCGGTCGGTCTCAGTCGCCGCT
chr11	75399518	75399519	RPS3	169	+	512	410	922	568	241	60	16	76	117	101	30	>RPS3(+)_CGCGCCCTTTATACTCACTT	>RPS3(+)_CGCGCCCTTTATACTCACTTCCGCCCGCGAGCCACTTCCTTTCCTTTC	>RPS3(+)_TCCGCCCGCGAGCCACTTCCTTTCCTTTC
chr10	17229277	17229278	VIM	853	+	309	903	1212	1033	122	32	43	75	167	58	18	>VIM(+)_CGGGGTTATAAAAACAGCGC	>VIM(+)_CGGGGTTATAAAAACAGCGCCCTCGGCGGGGTCCAGTCCTCTGCCACT	>VIM(+)_CCCTCGGCGGGGTCCAGTCCTCTGCCACT
chr17	76737330	76737331	SRSF2	2462	-	447	1162	1609	996	120	42	32	74	122	105	26	>SRSF2(-)_GAGCGATATAAACGGGCGCA	>SRSF2(-)_GAGCGATATAAACGGGCGCAGAGGCCGGCTGCCCGCCCAGTTGTTACT	>SRSF2(-)_AGAGGCCGGCTGCCCGCCCAGTTGTTACT
chr5	150449734	150449735	RPS14	221	-	299	184	483	75	162	60	14	74	19	23	18	>RPS14(-)_GGAAGTGACCCCCGTCGCTC	>RPS14(-)_GGAAGTGACCCCCGTCGCTCCGCCCCCTCCCACTCTCTCTTTCCGGTG	>RPS14(-)_CCGCCCCCTCCCACTCTCTCTTTCCGGTG
chr6	35468403	35468404	RPL10A	1095	+	611	428	1039	279	185	57	16	73	46	76	18	>RPL10A(+)_AGGGCCACTATTTGAGCGCA	>RPL10A(+)_AGGGCCACTATTTGAGCGCATGCGCAAGACATGCTAGTCTCTTTTCCG	>RPL10A(+)_ATGCGCAAGACATGCTAGTCTCTTTTCCG
chr22	39319622	39319623	RPL3	345	-	626	526	1152	1086	138	49	23	72	95	105	12	>RPL3(-)_ATTTGGCTTTATATAGCGGA	>RPL3(-)_ATTTGGCTTTATATAGCGGACCCGTAAGGCCGACCGGCCTCTACCGGC	>RPL3(-)_ACCCGTAAGGCCGACCGGCCTCTACCGGC
chr16	25257844	25257845	ZKSCAN2	163	-	758	37	795	8	160	72	0	72	3	3	4	>ZKSCAN2(-)_GCTCGGTGGCAGGCGGCGCA	>ZKSCAN2(-)_GCTCGGTGGCAGGCGGCGCATGCGTGACTGCGGTTCCCAGCGCCCCCC	>ZKSCAN2(-)_ATGCGTGACTGCGGTTCCCAGCGCCCCCC
chr1	9539488	9539489	SLC25A33	2022	+	772	379	1151	67	121	53	18	71	17	38	9	>SLC25A33(+)_GCGCGCCGGGCTCTAGCTCC	>SLC25A33(+)_GCGCGCCGGGCTCTAGCTCCCCGCCGGGCTCGCGCCGCAGAGGCCGGT	>SLC25A33(+)_CCCGCCGGGCTCGCGCCGCAGAGGCCGGT
chr16	3020369	3020370	TNFRSF12A	431	+	596	289	885	106	119	59	12	71	39	49	38	>TNFRSF12A(+)_GCGGCGGCCGTGGGTCCCTG	>TNFRSF12A(+)_GCGGCGGCCGTGGGTCCCTGCCGGCCGGCGGCGGGCGCAGACAGCGGC	>TNFRSF12A(+)_GCCGGCCGGCGGCGGGCGCAGACAGCGGC
chr5	179820904	179820905	SQSTM1	1321	+	466	747	1213	545	157	47	23	70	70	119	27	>SQSTM1(+)_GCGTTCGCTACAAAAGCCGC	>SQSTM1(+)_GCGTTCGCTACAAAAGCCGCGCGGCGGCTGCGACCGGGACGGCCCGTT	>SQSTM1(+)_CGCGGCGGCTGCGACCGGGACGGCCCGTT
chr20	2652631	2652632	NOP56	957	+	426	618	1044	176	122	45	25	70	35	48	14	>NOP56(+)_CTGGAGCCTGGTTCCGCGCG	>NOP56(+)_CTGGAGCCTGGTTCCGCGCGCCGGAGCGCGCTAGCCGCATTGCGAGCC	>NOP56(+)_GCCGGAGCGCGCTAGCCGCATTGCGAGCC
chr16	1984215	1984216	GFER	142	+	849	97	946	6	224	68	2	70	2	2	0	>GFER(+)_TCTGGAGGCCGAGCTGACCC	>GFER(+)_TCTGGAGGCCGAGCTGACCCGGCAGGCCTTGCGCGGGCAACATGGCGG	>GFER(+)_CGGCAGGCCTTGCGCGGGCAACATGGCGG
chr12	123232916	123232917	C12orf65	324	+	1262	161	1423	558	187	64	5	69	94	413	116	>C12orf65(+)_AGTCTAGAAAAGGCGCACCG	>C12orf65(+)_AGTCTAGAAAAGGCGCACCGCGGCCGGGCAGAGCTCCCACACGCCGAA	>C12orf65(+)_GCGGCCGGGCAGAGCTCCCACACGCCGAA
chr10	93893996	93893997	SLC35G1	149	+	1092	187	1279	2	195	63	6	69	6	1	5	>SLC35G1(+)_GCCGGAAGAGCGGCAGCCCA	>SLC35G1(+)_GCCGGAAGAGCGGCAGCCCAGGCGCTGCTGCTGGCGCCAGACGGCACC	>SLC35G1(+)_AGGCGCTGCTGCTGGCGCCAGACGGCACC
chr1	153990761	153990762	RPS27	206	+	541	464	1005	1056	179	50	19	69	113	284	60	>RPS27(+)_GTGTGCTCTATATAAGGGGC	>RPS27(+)_GTGTGCTCTATATAAGGGGCAGGATTTCCGCTTTCGCTCCTTTCCGGC	>RPS27(+)_CAGGATTTCCGCTTTCGCTCCTTTCCGGC
chr15	60397985	60397986	ANXA2	368	-	416	394	810	658	94	54	15	69	30	268	78	>ANXA2(-)_TGGCGGGTATAAAAGCCCCA	>ANXA2(-)_TGGCGGGTATAAAAGCCCCACCCAGGCCAGCCGGCTCTGCTCAGCATT	>ANXA2(-)_ACCCAGGCCAGCCGGCTCTGCTCAGCATT
chr16	89923344	89923345	TUBB3	3426	+	557	764	1321	445	149	35	33	68	38	379	52	>TUBB3(+)_GCGGCTATAAGAGCGCGCGG	>TUBB3(+)_GCGGCTATAAGAGCGCGCGGCCGCGGTCCCCGACCCTCAGCAGCCAGC	>TUBB3(+)_GCCGCGGTCCCCGACCCTCAGCAGCCAGC
chr17	75779777	75779778	H3F3B	1687	-	522	652	1174	601	110	56	12	68	79	102	24	>H3F3B(-)_AGCGTGCCTATAAAAACGGA	>H3F3B(-)_AGCGTGCCTATAAAAACGGAGGCGACGCGGGGGCTTGGAGCGCAGAGC	>H3F3B(-)_AGGCGACGCGGGGGCTTGGAGCGCAGAGC
chr2	191014171	191014172	STAT1	235	-	776	210	986	43	170	60	8	68	4	50	24	>STAT1(-)_GGGGCCGGGCGCCAGCGCTG	>STAT1(-)_GGGGCCGGGCGCCAGCGCTGCCTTTTCTCCTGCCGGGTAGTTTCGCTT	>STAT1(-)_GCCTTTTCTCCTGCCGGGTAGTTTCGCTT
chr7	75442745	75442746	POM121C	554	-	468	67	535	16	197	58	10	68	2	2	5	>POM121C(-)_ATGACGCGACGCGTGGCGCG	>POM121C(-)_ATGACGCGACGCGTGGCGCGGTGCACGCTGGGATATTTAAGTCTCCTC	>POM121C(-)_GGTGCACGCTGGGATATTTAAGTCTCCTC
chr19	14518396	14518397	DNAJB1	252	-	524	640	1164	463	93	41	26	67	47	211	67	>DNAJB1(-)_GCCGGACGGGTATATAGAGT	>DNAJB1(-)_GCCGGACGGGTATATAGAGTCCGGGACTGGTCGGCGGCGGAGCCGGGG	>DNAJB1(-)_TCCGGGACTGGTCGGCGGCGGAGCCGGGG
chr3	33440363	33440364	UBP1	126	-	923	194	1117	36	173	55	12	67	7	22	8	>UBP1(-)_AGCGGCGCGTGAACCTAAGT	>UBP1(-)_AGCGGCGCGTGAACCTAAGTCGGAGTCGCGTTGAAGCCAGCGTCCGGC	>UBP1(-)_TCGGAGTCGCGTTGAAGCCAGCGTCCGGC
chr7	5530600	5530601	ACTB	1530	-	346	729	1075	653	19	54	13	67	52	122	29	>ACTB(-)_GCGGCGCCCTATAAAACCCA	>ACTB(-)_GCGGCGCCCTATAAAACCCAGCGGCGCGACGCGCCACCACCGCCGAGA	>ACTB(-)_AGCGGCGCGACGCGCCACCACCGCCGAGA
chr12	56645983	56645984	ATP5F1B	937	-	628	357	985	319	179	54	13	67	60	52	17	>ATP5F1B(-)_CGGCAGGAGAGCAGGCGGCT	>ATP5F1B(-)_CGGCAGGAGAGCAGGCGGCTGCGGTTGCTGCAGCCTTCAGTCTCCACC	>ATP5F1B(-)_TGCGGTTGCTGCAGCCTTCAGTCTCCACC
chr3	51391303	51391304	RBM15B	459	+	803	147	950	18	224	66	1	67	10	25	15	>RBM15B(+)_CCGCCCCGCCGCCACCGCCG	>RBM15B(+)_CCGCCCCGCCGCCACCGCCGCGCCGAGTCCTTTTGTCCAAGATGGCGG	>RBM15B(+)_GCGCCGAGTCCTTTTGTCCAAGATGGCGG
chr1	156282804	156282805	SMG5	72	-	781	121	902	22	236	62	5	67	5	47	64	>SMG5(-)_GCAGGCGGAGGAGGAGCTGT	>SMG5(-)_GCAGGCGGAGGAGGAGCTGTCGCGGGCAGCCGCCTCACAGCGATGGCG	>SMG5(-)_TCGCGGGCAGCCGCCTCACAGCGATGGCG
chr1	150579609	150579610	MCL1	600	-	545	246	791	673	144	56	11	67	97	230	82	>MCL1(-)_CTGGCCGCCCTAAAACCGTG	>MCL1(-)_CTGGCCGCCCTAAAACCGTGATAAAGGAGCTGCTCGCCACTTCTCACT	>MCL1(-)_GATAAAGGAGCTGCTCGCCACTTCTCACT
chr1	182839348	182839349	DHX9	357	+	432	174	606	10	207	58	9	67	2	4	3	>DHX9(+)_CGCTCGCTGGCCCCGCCCCC	>DHX9(+)_CGCTCGCTGGCCCCGCCCCCTAGCGCCGCGGTCGGAGCCATTTCGCCG	>DHX9(+)_CTAGCGCCGCGGTCGGAGCCATTTCGCCG
chr6	139374645	139374646	CITED2	1199	-	220	1059	1279	679	119	17	49	66	76	61	10	>CITED2(-)_ATGCCTATATTAACTGTGGC	>CITED2(-)_ATGCCTATATTAACTGTGGCCAAAGCCCTAAGAAACACAGCTCATTGT	>CITED2(-)_CCAAAGCCCTAAGAAACACAGCTCATTGT
chr19	58544455	58544456	TRIM28	134	+	922	270	1192	73	157	62	4	66	12	56	37	>TRIM28(+)_GGCGCCAGTTATTTCTGTCC	>TRIM28(+)_GGCGCCAGTTATTTCTGTCCCGCCCCCCGGCCTCGGCTCTTTCTGCGA	>TRIM28(+)_CCGCCCCCCGGCCTCGGCTCTTTCTGCGA
chr9	72365207	72365208	ZFAND5	1245	-	574	509	1083	368	153	54	12	66	62	17	16	>ZFAND5(-)_TCTTTTCCCTCACAGCCCGG	>ZFAND5(-)_TCTTTTCCCTCACAGCCCGGGCGCCGGGCGGCGAGTGCGTTAGTCGGC	>ZFAND5(-)_GGCGCCGGGCGGCGAGTGCGTTAGTCGGC
chr12	113221488	113221489	TPCN1	300	+	487	375	862	85	201	47	19	66	14	12	4	>TPCN1(+)_GCGGTGGATAGGAGAGCTGG	>TPCN1(+)_GCGGTGGATAGGAGAGCTGGCGCAGCTGCCCTGGTGGCAGTGGCTGAA	>TPCN1(+)_GCGCAGCTGCCCTGGTGGCAGTGGCTGAA
chr12	108857582	108857583	SSH1	289	-	633	132	765	20	166	61	5	66	7	5	0	>SSH1(-)_CCCGGCCCGGCTCGGCCCGG	>SSH1(-)_CCCGGCCCGGCTCGGCCCGGCCGCCCGCGCGCGGCTCCAGGAGGCCCC	>SSH1(-)_GCCGCCCGCGCGCGGCTCCAGGAGGCCCC
chr9	121370247	121370248	STOM	241	-	934	407	1341	78	174	54	11	65	12	23	11	>STOM(-)_GCGGCAATCTGGGTCTTGTG	>STOM(-)_GCGGCAATCTGGGTCTTGTGCCTCTGGCTCCTCAGGGCATTCCCGGCG	>STOM(-)_GCCTCTGGCTCCTCAGGGCATTCCCGGCG
chr6	33272076	33272077	RPS18	213	+	450	675	1125	546	197	44	21	65	74	329	98	>RPS18(+)_CTGGAAGCTATATAATGATA	>RPS18(+)_CTGGAAGCTATATAATGATATCGCGTCACTTCCGCTCTCTCTTCCACA	>RPS18(+)_ATCGCGTCACTTCCGCTCTCTCTTCCACA
chr17	81666745	81666746	CCDC137	195	+	685	92	777	31	214	63	2	65	19	17	24	>CCDC137(+)_GGGGCGGAACCATGCAGGAA	>CCDC137(+)_GGGGCGGAACCATGCAGGAAGGCGGAAGTGGCTTCGCTAGGGAGCCTC	>CCDC137(+)_AGGCGGAAGTGGCTTCGCTAGGGAGCCTC
chr19	5690295	5690296	RPL36	176	+	462	104	566	336	198	60	5	65	64	327	135	>RPL36(+)_GCCGAGTAGATATCCCGGAG	>RPL36(+)_GCCGAGTAGATATCCCGGAGTTCCGCGCGGCGCCAGCCCTTCCGCCAC	>RPL36(+)_GTTCCGCGCGGCGCCAGCCCTTCCGCCAC
chr16	70251909	70251910	EXOSC6	27	-	226	52	278	2	162	63	2	65	1	12	3	>EXOSC6(-)_GATGCGGCAGGGCGTTGGGC	>EXOSC6(-)_GATGCGGCAGGGCGTTGGGCGGAAGGGGTTCGCACGCCAAGAACCGCC	>EXOSC6(-)_CGGAAGGGGTTCGCACGCCAAGAACCGCC
chr15	39581078	39581079	THBS1	7405	+	347	926	1273	853	112	37	27	64	140	85	25	>THBS1(+)_AGCGCCCCTTTAAAAGCGCG	>THBS1(+)_AGCGCCCCTTTAAAAGCGCGCGGCTCCTCCGCCTTGCCAGCCGCTGCG	>THBS1(+)_GCGGCTCCTCCGCCTTGCCAGCCGCTGCG
chr14	35404748	35404749	NFKBIA	479	-	228	873	1101	372	85	20	44	64	52	24	5	>NFKBIA(-)_CAGCGTTTATAGGGCGCCGC	>NFKBIA(-)_CAGCGTTTATAGGGCGCCGCGGCGGCGCTGCAGAGCCCACAGCAGTCC	>NFKBIA(-)_CGGCGGCGCTGCAGAGCCCACAGCAGTCC
chr5	179623669	179623670	HNRNPH1	861	-	425	538	963	79	120	47	17	64	9	86	26	>HNRNPH1(-)_AAGGGACCTTATTTAGGTTG	>HNRNPH1(-)_AAGGGACCTTATTTAGGTTGCGCAGGCGCCCGCTGGCCATTTCGTCTT	>HNRNPH1(-)_GCGCAGGCGCCCGCTGGCCATTTCGTCTT
chr12	56158369	56158370	MYL6	284	+	353	322	675	64	113	41	23	64	10	27	15	>MYL6(+)_AAGACTAGGGTTGGGCCGAG	>MYL6(+)_AAGACTAGGGTTGGGCCGAGAGTCGGAGCCATTACTGCAGGAAAAGGT	>MYL6(+)_GAGTCGGAGCCATTACTGCAGGAAAAGGT
chr17	45148474	45148475	HEXIM1	1171	+	260	925	1185	639	55	25	38	63	41	97	18	>HEXIM1(+)_AAGCTTCTATATAAAAGGGG	>HEXIM1(+)_AAGCTTCTATATAAAAGGGGCGCAGAGGACTGGGAGACAGCAGTTGGA	>HEXIM1(+)_GCGCAGAGGACTGGGAGACAGCAGTTGGA
chr6	30744546	30744547	IER3	673	-	426	755	1181	415	86	40	23	63	31	43	9	>IER3(-)_AGGAGCACATAAATTACCTC	>IER3(-)_AGGAGCACATAAATTACCTCTGCCGGCAGCCGACCCTCACTTGGCCTT	>IER3(-)_CTGCCGGCAGCCGACCCTCACTTGGCCTT
chr16	31180142	31180143	FUS	570	+	373	700	1073	356	151	33	30	63	43	75	15	>FUS(+)_AGCGTACTTAAGCTTCGACG	>FUS(+)_AGCGTACTTAAGCTTCGACGCAGGAGGCGGGGCTGCTCAGTCCTCCAG	>FUS(+)_GCAGGAGGCGGGGCTGCTCAGTCCTCCAG
chr19	48619175	48619176	RPL18	205	-	415	361	776	17	204	47	16	63	4	20	5	>RPL18(-)_CGCTTGAGGCTTTCCCCGCC	>RPL18(-)_CGCTTGAGGCTTTCCCCGCCCACCCCAGCCCGTTCTCTCTTTCCGGAC	>RPL18(-)_CCACCCCAGCCCGTTCTCTCTTTCCGGAC
chr13	21604152	21604153	MICU2	88	-	648	92	740	18	270	59	4	63	10	4	2	>MICU2(-)_CGGCGCCGGGAGAGAAGCGC	>MICU2(-)_CGGCGCCGGGAGAGAAGCGCCGCCTAGCTGCGCTTCCGCAAAGATGGC	>MICU2(-)_CCGCCTAGCTGCGCTTCCGCAAAGATGGC
chr22	40346528	40346529	ADSL	329	+	604	113	717	39	222	61	2	63	9	34	17	>ADSL(+)_CTGGCCTCCAGGTTTCCGCT	>ADSL(+)_CTGGCCTCCAGGTTTCCGCTTCCGCTCTTCCCTGGTCCAGTCCACCCT	>ADSL(+)_TTCCGCTCTTCCCTGGTCCAGTCCACCCT
chr2	219160800	219160801	NHEJ1	17	-	409	42	451	9	202	60	3	63	2	9	11	>NHEJ1(-)_CCCTGCCTCCTCTTGCGGTG	>NHEJ1(-)_CCCTGCCTCCTCTTGCGGTGGGGGGAAAGCGGCCTCTTACTCTAGGCC	>NHEJ1(-)_GGGGGGAAAGCGGCCTCTTACTCTAGGCC
chr19	39406846	39406847	ZFP36	905	+	426	838	1264	889	116	36	26	62	67	102	25	>ZFP36(+)_CAGTTTCCTATAAGTAGCCG	>ZFP36(+)_CAGTTTCCTATAAGTAGCCGGCTCTCGGTGCCAGCCTCAGCCTGACTT	>ZFP36(+)_GGCTCTCGGTGCCAGCCTCAGCCTGACTT
chr2	20447073	20447074	RHOB	2243	+	454	785	1239	798	136	35	27	62	97	72	13	>RHOB(+)_GGACTCTTTAAATAGCGGGC	>RHOB(+)_GGACTCTTTAAATAGCGGGCGCTAGGGCCGCAGCCCTCATCTGCCACC	>RHOB(+)_CGCTAGGGCCGCAGCCCTCATCTGCCACC
chr19	1248582	1248583	MIDN	3306	+	569	458	1027	381	110	41	21	62	49	117	28	>MIDN(+)_GCGGCGCGGATAAAGGCTGA	>MIDN(+)_GCGGCGCGGATAAAGGCTGAGGGCCGCGCGCTTGGCCCAGACCGGCCC	>MIDN(+)_AGGGCCGCGCGCTTGGCCCAGACCGGCCC
chr8	100722084	100722085	PABPC1	245	-	323	983	1306	914	94	34	27	61	77	83	12	>PABPC1(-)_CGGGGTATAAGTAGAGGGTG	>PABPC1(-)_CGGGGTATAAGTAGAGGGTGCAGGAGGCGGTGCTTCCCCTTCTCCCCG	>PABPC1(-)_GCAGGAGGCGGTGCTTCCCCTTCTCCCCG
chr2	96858005	96858006	ANKRD39	60	-	898	70	968	7	178	59	2	61	7	6	8	>ANKRD39(-)_CCTCCCGCCGAGGCTGAGCC	>ANKRD39(-)_CCTCCCGCCGAGGCTGAGCCTGAGACCCGGGGCGGATCGACTGACGCC	>ANKRD39(-)_CTGAGACCCGGGGCGGATCGACTGACGCC
chr6	26156329	26156330	HIST1H1E	843	+	330	598	928	678	160	33	28	61	68	122	27	>HIST1H1E(+)_CCGCCCTATATAAACGGGCG	>HIST1H1E(+)_CCGCCCTATATAAACGGGCGGGCGCAGCGCCGCGGCTCGAGTCCCGGC	>HIST1H1E(+)_GGGCGCAGCGCCGCGGCTCGAGTCCCGGC
chr2	216498843	216498844	RPL37A	381	+	427	373	800	322	163	42	19	61	72	144	81	>RPL37A(+)_CGTCCGCCTAATACCGCGCC	>RPL37A(+)_CGTCCGCCTAATACCGCGCCTGCGCACCGCGTCTCTTCCTTTCTGGGC	>RPL37A(+)_CTGCGCACCGCGTCTCTTCCTTTCTGGGC
chr15	82540451	82540452	RPS17	132	-	511	205	716	568	207	54	7	61	93	111	20	>RPS17(-)_CCTAAGCTTTAACAGGCTTC	>RPS17(-)_CCTAAGCTTTAACAGGCTTCGCCTGTGCTTCCTGTTTCCTCTTTTACC	>RPS17(-)_CGCCTGTGCTTCCTGTTTCCTCTTTTACC
chr1	43707546	43707547	ST3GAL3	21	+	425	132	557	11	234	56	5	61	14	12	8	>ST3GAL3(+)_GGGTCGCGGCCGCGCGCTCC	>ST3GAL3(+)_GGGTCGCGGCCGCGCGCTCCGCCCGCCGCTGCGTCCCCACTATGGCGG	>ST3GAL3(+)_CGCCCGCCGCTGCGTCCCCACTATGGCGG
chr1	149842749	149842750	HIST2H2AA3	6357	-	287	840	1127	1058	110	29	31	60	100	69	17	>HIST2H2AA3(-)_TTCTGTCTATAAAAAGGTGA	>HIST2H2AA3(-)_TTCTGTCTATAAAAAGGTGAAGCAGCGGCGTTTTCGGCGACTTTCCCG	>HIST2H2AA3(-)_AAGCAGCGGCGTTTTCGGCGACTTTCCCG
chr19	13153054	13153055	IER2	1638	+	276	726	1002	739	91	33	27	60	42	20	6	>IER2(+)_TGGGGGTATAAAAGGGCCTG	>IER2(+)_TGGGGGTATAAAAGGGCCTGGGTGGCGGGCGCCTGGGCAGAGCGTCCT	>IER2(+)_GGGTGGCGGGCGCCTGGGCAGAGCGTCCT
chr13	106568145	106568146	ARGLU1	153	-	836	138	974	2	231	55	5	60	2	4	2	>ARGLU1(-)_CGGCACGTTTCGCGCAGGGC	>ARGLU1(-)_CGGCACGTTTCGCGCAGGGCATTGTGGGAAGGGCGGCCGGTGCAGCCG	>ARGLU1(-)_CATTGTGGGAAGGGCGGCCGGTGCAGCCG
chr6	36986141	36986142	MTCH1	152	-	697	156	853	103	125	55	5	60	29	33	16	>MTCH1(-)_GGGCGCCATGGGAGCTTCGG	>MTCH1(-)_GGGCGCCATGGGAGCTTCGGACCCGGAAGTGGCGCCCTGGGCTCGCGG	>MTCH1(-)_GACCCGGAAGTGGCGCCCTGGGCTCGCGG
chr18	49492478	49492479	RPL17	218	-	482	264	746	141	165	52	8	60	41	54	20	>RPL17(-)_CAAGTTCTCATGAGTTCTCC	>RPL17(-)_CAAGTTCTCATGAGTTCTCCCAAAATCCACCGCTCTTCCTCTTTCCCT	>RPL17(-)_CCAAAATCCACCGCTCTTCCTCTTTCCCT
chr18	49492478	49492479	RPL17-C18orf32	218	-	482	264	746	141	165	52	8	60	41	54	20	>RPL17-C18orf32(-)_CAAGTTCTCATGAGTTCTCC	>RPL17-C18orf32(-)_CAAGTTCTCATGAGTTCTCCCAAAATCCACCGCTCTTCCTCTTTCCCT	>RPL17-C18orf32(-)_CCAAAATCCACCGCTCTTCCTCTTTCCCT
chr12	56116632	56116633	RPL41	161	+	258	429	687	635	164	36	24	60	91	142	23	>RPL41(+)_GCGCTCCATTAAATAGCCGT	>RPL41(+)_GCGCTCCATTAAATAGCCGTAGACGGAACTTCGCCTTTCTCTCGGCCT	>RPL41(+)_TAGACGGAACTTCGCCTTTCTCTCGGCCT
chr17	8383192	8383193	RPL26	95	-	325	316	641	409	175	45	15	60	61	128	57	>RPL26(-)_CTTTGGTAAACTTACAGAAC	>RPL26(-)_CTTTGGTAAACTTACAGAACCGGAAGCAGCGTGTAGTTCTCTTCCCTT	>RPL26(-)_CCGGAAGCAGCGTGTAGTTCTCTTCCCTT
chr14	30622318	30622319	SCFD1	444	+	385	136	521	36	170	46	14	60	14	21	16	>SCFD1(+)_CAGCCACGTCATCCCCCCGC	>SCFD1(+)_CAGCCACGTCATCCCCCCGCTCCGCTCCCCAGCCGGGCAGTGGCTCGT	>SCFD1(+)_CTCCGCTCCCCAGCCGGGCAGTGGCTCGT
chr5	172771194	172771195	DUSP1	185	-	383	830	1213	715	86	34	25	59	91	107	23	>DUSP1(-)_AGGCCGCATATAAACGCGCT	>DUSP1(-)_AGGCCGCATATAAACGCGCTCCCCGGGCCAGGCTCGCTGCGAAGGACA	>DUSP1(-)_TCCCCGGGCCAGGCTCGCTGCGAAGGACA
chr3	186783576	186783577	EIF4A2	1160	+	399	691	1090	1309	79	41	18	59	153	61	11	>EIF4A2(+)_CACGAGCCTATAAAAAACGG	>EIF4A2(+)_CACGAGCCTATAAAAAACGGGTGGTTGGGCGCCGCTGTCTTTTCAGTC	>EIF4A2(+)_GGTGGTTGGGCGCCGCTGTCTTTTCAGTC
chr11	123062138	123062139	HSPA8	667	-	335	586	921	472	71	40	19	59	27	87	13	>HSPA8(-)_AAGATAGGGTATAAGAGGCA	>HSPA8(-)_AAGATAGGGTATAAGAGGCAGGGTGGCGGGCGGAAACCGGTCTCATTG	>HSPA8(-)_AGGGTGGCGGGCGGAAACCGGTCTCATTG
chr10	13300063	13300064	PHYH	214	-	438	424	862	149	207	43	16	59	11	65	33	>PHYH(-)_CGCCCGCTGGGCTAAATGGG	>PHYH(-)_CGCCCGCTGGGCTAAATGGGGCAGAGGCCGGGAGGGGTGGGGGTTCCC	>PHYH(-)_GGCAGAGGCCGGGAGGGGTGGGGGTTCCC
chr1	224114126	224114127	FBXO28	165	+	670	134	804	11	216	56	3	59	11	19	13	>FBXO28(+)_CTGTTCCCCTTGCTGTGGGG	>FBXO28(+)_CTGTTCCCCTTGCTGTGGGGGTAAGGAATCAAGCCCCCAAGATGGCGG	>FBXO28(+)_GGTAAGGAATCAAGCCCCCAAGATGGCGG
chr1	179082075	179082076	TOR3A	88	+	697	100	797	52	176	58	1	59	10	7	7	>TOR3A(+)_CCTAGGAAGTGCGGTCCCCG	>TOR3A(+)_CCTAGGAAGTGCGGTCCCCGCCTGACCGCCCCGGGCTTAAGGGAGCCT	>TOR3A(+)_GCCTGACCGCCCCGGGCTTAAGGGAGCCT
chr11	93741493	93741494	TAF1D	261	-	277	511	788	381	79	41	18	59	52	68	26	>TAF1D(-)_CGGCCTGACTATTACTTGGG	>TAF1D(-)_CGGCCTGACTATTACTTGGGCCACGGAAATAGCCAACCCTTTTCTTCC	>TAF1D(-)_GCCACGGAAATAGCCAACCCTTTTCTTCC
chr8	22367281	22367282	SLC39A14	26	+	505	190	695	191	193	54	5	59	20	103	28	>SLC39A14(+)_CGGGTATATAGCCGGGCATG	>SLC39A14(+)_CGGGTATATAGCCGGGCATGCGCGCGGTGCCGGGGCCCGGACGCAGTG	>SLC39A14(+)_GCGCGCGGTGCCGGGGCCCGGACGCAGTG
chr19	54200857	54200858	RPS9	475	+	342	303	645	815	144	43	16	59	130	317	86	>RPS9(+)_GGCGTTACTATAAGAGCGCA	>RPS9(+)_GGCGTTACTATAAGAGCGCAGCCGTGGCGCTTCCGCGCCTCTTTCTCA	>RPS9(+)_AGCCGTGGCGCTTCCGCGCCTCTTTCTCA
chr2	241734634	241734635	D2HGDH	168	+	568	74	642	15	186	53	6	59	18	9	12	>D2HGDH(+)_CCGTCAATGCGCAGGCGCGG	>D2HGDH(+)_CCGTCAATGCGCAGGCGCGGCGTCGCCCCGCCCACTCCGGCTCGGCGG	>D2HGDH(+)_GCGTCGCCCCGCCCACTCCGGCTCGGCGG
chr16	2268113	2268114	RNPS1	660	-	480	136	616	46	249	47	12	59	16	15	11	>RNPS1(-)_CGGGCGGCGGCGACTTCCCG	>RNPS1(-)_CGGGCGGCGGCGACTTCCCGCTCCTTGACTCTGACGTCAGAGCGGCGC	>RNPS1(-)_GCTCCTTGACTCTGACGTCAGAGCGGCGC
chr22	50525571	50525572	SCO2	44	-	328	41	369	1	150	58	1	59	3	3	6	>SCO2(-)_CGCAGCTCCGGGGACGCCTG	>SCO2(-)_CGCAGCTCCGGGGACGCCTGCGCCCTGCCTGTGAGCGTGTGGCGCCCG	>SCO2(-)_GCGCCCTGCCTGTGAGCGTGTGGCGCCCG
chr17	37609397	37609398	SYNRG	82	-	229	121	350	31	149	52	7	59	7	1	3	>SYNRG(-)_TTTGACCCGGAAGTGGCTGT	>SYNRG(-)_TTTGACCCGGAAGTGGCTGTGTTCAGCTGACAGCTGCTGATAAGGTGG	>SYNRG(-)_TGTTCAGCTGACAGCTGCTGATAAGGTGG
chr19	12938608	12938609	CALR	174	+	573	654	1227	1174	104	45	13	58	135	210	61	>CALR(+)_CGGGTGGGTATAAAAGTGCA	>CALR(+)_CGGGTGGGTATAAAAGTGCAAGGCGGGCGGCGGCGTCCGTCCGTACTG	>CALR(+)_AAGGCGGGCGGCGGCGTCCGTCCGTACTG
chr11	62805439	62805440	NXF1	727	-	572	490	1062	646	153	48	10	58	51	98	19	>NXF1(-)_CTTTGCTGTATAAATGCGGT	>NXF1(-)_CTTTGCTGTATAAATGCGGTGGCGCCCGGCGTAGGGACACTTCGGTCC	>NXF1(-)_TGGCGCCCGGCGTAGGGACACTTCGGTCC
chr10	131981922	131981923	BNIP3	1301	-	714	306	1020	86	209	46	12	58	15	29	12	>BNIP3(-)_CCTGTGAGTTCCTCCGGCCG	>BNIP3(-)_CCTGTGAGTTCCTCCGGCCGGGCTGCGGGGCTCCGCTCAGTCCGGGAG	>BNIP3(-)_GGGCTGCGGGGCTCCGCTCAGTCCGGGAG
chr11	842528	842529	POLR2L	902	-	673	298	971	139	206	44	14	58	23	34	15	>POLR2L(-)_TGGGGGGGTTCTTCGCGTGC	>POLR2L(-)_TGGGGGGGTTCTTCGCGTGCGGCCGGGCCGGGCCGGGCAGTCTGGGAC	>POLR2L(-)_CGGCCGGGCCGGGCCGGGCAGTCTGGGAC
chr17	28357515	28357516	POLDIP2	125	-	661	172	833	26	205	53	5	58	13	21	11	>POLDIP2(-)_CAAGAGGGCCGGGACGCCGC	>POLDIP2(-)_CAAGAGGGCCGGGACGCCGCGCGGGGCAGTGTGGGACTGGGGCGGAAC	>POLDIP2(-)_CGCGGGGCAGTGTGGGACTGGGGCGGAAC
chr8	8386438	8386439	PRAG1	1513	-	392	365	757	47	194	47	11	58	17	11	10	>PRAG1(-)_CCGCGCTCACAGCTGCCACC	>PRAG1(-)_CCGCGCTCACAGCTGCCACCCGGCCGCCGGGCCCAGGCAGAAGCCACC	>PRAG1(-)_CCGGCCGCCGGGCCCAGGCAGAAGCCACC
chr12	123712402	123712403	ATP6V0A2	128	+	661	84	745	28	161	55	3	58	7	3	2	>ATP6V0A2(+)_ACTGCTGTGGCGGCAGCTGG	>ATP6V0A2(+)_ACTGCTGTGGCGGCAGCTGGAGCGGCGGCCGCGGTGGCAGAACCGGGG	>ATP6V0A2(+)_GAGCGGCGGCCGCGGTGGCAGAACCGGGG
chr10	32958226	32958227	ITGB1	179	-	468	156	624	12	131	52	6	58	6	18	9	>ITGB1(-)_CCGCCACCCGCCGCGCCCGA	>ITGB1(-)_CCGCCACCCGCCGCGCCCGACACCCGGGAGGCCCCGCCAGCCCGCGGG	>ITGB1(-)_ACACCCGGGAGGCCCCGCCAGCCCGCGGG
chr11	8682642	8682643	TRIM66	73	-	386	186	572	20	207	50	8	58	9	18	13	>TRIM66(-)_TGCGCGCCTGCTAGTCGCTT	>TRIM66(-)_TGCGCGCCTGCTAGTCGCTTCCTCTTTCTGAGGGTGGTGATCCCCCAT	>TRIM66(-)_TCCTCTTTCTGAGGGTGGTGATCCCCCAT
chr11	65354759	65354760	TIGD3	137	+	505	60	565	26	152	55	3	58	2	6	4	>TIGD3(+)_GGGTGCAGAGGGGCCGCACC	>TIGD3(+)_GGGTGCAGAGGGGCCGCACCGCGGACTTCGCAGCCGGGAGAGAGCCCG	>TIGD3(+)_CGCGGACTTCGCAGCCGGGAGAGAGCCCG
chr17	7234516	7234517	DVL2	96	-	190	79	269	6	103	46	12	58	1	2	5	>DVL2(-)_GGCTGCCTTTAAGTCACGTG	>DVL2(-)_GGCTGCCTTTAAGTCACGTGACATGAGGAGAGGTGGGCGGGTACCTGG	>DVL2(-)_GACATGAGGAGAGGTGGGCGGGTACCTGG
chr19	2476126	2476127	GADD45B	5276	+	292	1051	1343	1360	90	26	31	57	129	185	29	>GADD45B(+)_TCAAGTCTATAAAAGTCGGT	>GADD45B(+)_TCAAGTCTATAAAAGTCGGTGCCGGAGGCTCCCAGCTCAGATCGCCGA	>GADD45B(+)_TGCCGGAGGCTCCCAGCTCAGATCGCCGA
chr12	123233135	123233136	MPHOSPH9	54	-	1225	57	1282	8	192	56	1	57	5	4	2	>MPHOSPH9(-)_AATCACTGGAGAGACGCCGG	>MPHOSPH9(-)_AATCACTGGAGAGACGCCGGGCGCGCGCGCGCTCCCTCGGGTAACGGT	>MPHOSPH9(-)_GGCGCGCGCGCGCTCCCTCGGGTAACGGT
chr17	28744010	28744011	TRAF4	1747	+	849	233	1082	102	87	49	8	57	37	1	0	>TRAF4(+)_AGGGCGGGCTTCACAGCCGA	>TRAF4(+)_AGGGCGGGCTTCACAGCCGAGCCCTGGCCGCGACCGCCAGTCGGCGCC	>TRAF4(+)_AGCCCTGGCCGCGACCGCCAGTCGGCGCC
chr20	25248084	25248085	PYGB	428	+	707	193	900	7	162	52	5	57	1	17	13	>PYGB(+)_CGGTCCATCCCGCCCGCAGA	>PYGB(+)_CGGTCCATCCCGCCCGCAGAGCCGCAGTGCCGGGCGCCAGAGCAGCGG	>PYGB(+)_AGCCGCAGTGCCGGGCGCCAGAGCAGCGG
chr5	40835211	40835212	RPL37	263	-	343	360	703	270	153	42	15	57	76	97	45	>RPL37(-)_TCTGAGCGTGATATAGCGGA	>RPL37(-)_TCTGAGCGTGATATAGCGGAAGTGCCTTCTCTTCCGGTCTTTCTGGTC	>RPL37(-)_AAGTGCCTTCTCTTCCGGTCTTTCTGGTC
chr16	57447481	57447482	COQ9	142	+	589	113	702	23	220	53	4	57	10	5	3	>COQ9(+)_CTTAGGGCCGTGGTCCCGTA	>COQ9(+)_CTTAGGGCCGTGGTCCCGTAGCTACCGGTCGCGTCGCCGTGGGCGACG	>COQ9(+)_AGCTACCGGTCGCGTCGCCGTGGGCGACG
chr6	26027282	26027283	HIST1H4B	605	-	159	506	665	91	74	22	35	57	8	6	0	>HIST1H4B(-)_GTTCGTGTATAAATGCTCGT	>HIST1H4B(-)_GTTCGTGTATAAATGCTCGTGGCTTGCTTTCTTTTCGCGTACCTGGTT	>HIST1H4B(-)_TGGCTTGCTTTCTTTTCGCGTACCTGGTT
chr9	122941019	122941020	RABGAP1	225	+	561	96	657	0	180	51	6	57	0	7	16	>RABGAP1(+)_CTCACGTGAGTAAAGGGGTG	>RABGAP1(+)_CTCACGTGAGTAAAGGGGTGGGGGGGCGGGGACAGGGCGGTTTGGGAG	>RABGAP1(+)_GGGGGGGCGGGGACAGGGCGGTTTGGGAG
chr7	135662513	135662514	STMP1	211	+	476	93	569	7	189	52	5	57	8	7	4	>STMP1(+)_TCGACGAGGGGTTCCGCCCC	>STMP1(+)_TCGACGAGGGGTTCCGCCCCCCCCGCGCATGGGGAGGTAGGCTCGGAC	>STMP1(+)_CCCCCGCGCATGGGGAGGTAGGCTCGGAC
chr3	197791263	197791264	LRCH3	123	+	461	106	567	5	204	52	5	57	4	9	19	>LRCH3(+)_GGTCCGGCCGCGCATGCGCT	>LRCH3(+)_GGTCCGGCCGCGCATGCGCTGAGCTGGCGGGCCCGAGTGTTGTCGGCT	>LRCH3(+)_TGAGCTGGCGGGCCCGAGTGTTGTCGGCT
chr16	18790333	18790334	RPS15A	109	-	281	206	487	152	208	43	14	57	32	15	10	>RPS15A(-)_CCCGCTTCCCATAACTCCGT	>RPS15A(-)_CCCGCTTCCCATAACTCCGTGCGCTCTCCCCTCCCGTCCTCTTTCCGC	>RPS15A(-)_TGCGCTCTCCCCTCCCGTCCTCTTTCCGC
chr4	73069704	73069705	COX18	120	-	338	92	430	1	251	50	7	57	3	3	3	>COX18(-)_CTGTTGCTGGCGCGTGCGCG	>COX18(-)_CTGTTGCTGGCGCGTGCGCGTATCAGCCTTGGCTGGCCGGTGTATGTC	>COX18(-)_GTATCAGCCTTGGCTGGCCGGTGTATGTC
chr12	51083595	51083596	CSRNP2	2037	-	507	672	1179	550	127	29	27	56	40	42	18	>CSRNP2(-)_CGGCGCCTATAAGAGCCAGT	>CSRNP2(-)_CGGCGCCTATAAGAGCCAGTGCGCTGCGGCCGGATCCTATTGTTAGCC	>CSRNP2(-)_TGCGCTGCGGCCGGATCCTATTGTTAGCC
chr12	120201106	120201107	RPLP0	580	-	389	565	954	974	146	39	17	56	100	250	71	>RPLP0(-)_TTCGCATTATAAAAGGCACG	>RPLP0(-)_TTCGCATTATAAAAGGCACGCGCGGGCGCGAGGCCCTTCTCTCGCCAG	>RPLP0(-)_GCGCGGGCGCGAGGCCCTTCTCTCGCCAG
chr19	1104072	1104073	GPX4	141	+	431	424	855	72	168	44	12	56	10	16	10	>GPX4(+)_CCCGCCGCGATGAGCCTCGG	>GPX4(+)_CCCGCCGCGATGAGCCTCGGCCGCCTTTGCCGCCTACTGAAGCCGGCG	>GPX4(+)_GCCGCCTTTGCCGCCTACTGAAGCCGGCG
chr3	39406719	39406720	RPSA	538	+	312	332	644	515	183	42	14	56	75	56	9	>RPSA(+)_CAACGGAGTACATAAGGACG	>RPSA(+)_CAACGGAGTACATAAGGACGTCATTTCCTGCCGCCTGTCTTTTCCGTG	>RPSA(+)_GTCATTTCCTGCCGCCTGTCTTTTCCGTG
chr2	98608612	98608613	UNC50	53	+	467	113	580	15	204	52	4	56	1	10	5	>UNC50(+)_CCGCGGCGGAAGTCGGTTCC	>UNC50(+)_CCGCGGCGGAAGTCGGTTCCCGTGACGCGGCGCGCCCCAAGGGCCGGC	>UNC50(+)_CCGTGACGCGGCGCGCCCCAAGGGCCGGC
chr1	6625185	6625186	THAP3	32	+	158	39	197	6	220	50	6	56	4	4	6	>THAP3(+)_AGGTCCCTCCCCTCTCCGCA	>THAP3(+)_AGGTCCCTCCCCTCTCCGCAGGCCCCGCCGCCGCCGCCATCTTTGTTG	>THAP3(+)_AGGCCCCGCCGCCGCCGCCATCTTTGTTG
chr17	41688889	41688890	EIF1	858	+	383	489	872	895	96	35	20	55	133	178	50	>EIF1(+)_GGCTATATAACTAAACACAG	>EIF1(+)_GGCTATATAACTAAACACAGGCACCGCCCCTCTGCCCCAGTCACTGAG	>EIF1(+)_GGCACCGCCCCTCTGCCCCAGTCACTGAG
chr15	74956768	74956769	RPP25	196	-	667	96	763	60	152	53	2	55	27	28	6	>RPP25(-)_TCAGCTAAAGGCGCGGAGCA	>RPP25(-)_TCAGCTAAAGGCGCGGAGCACCCGGCGCCGAGAGCGCTGAGTAGAGCG	>RPP25(-)_ACCCGGCGCCGAGAGCGCTGAGTAGAGCG
chr16	229415	229416	LUC7L	121	-	597	80	677	24	261	53	2	55	5	37	21	>LUC7L(-)_GCGGGAAAGAGCCGAGTGGG	>LUC7L(-)_GCGGGAAAGAGCCGAGTGGGCTCGAGGCCGACGCGACCATCGTTTGTC	>LUC7L(-)_GCTCGAGGCCGACGCGACCATCGTTTGTC
chr4	151099629	151099630	RPS3A	89	+	478	196	674	284	208	49	6	55	67	193	99	>RPS3A(+)_CCGTACGCCTAAGTTCTCGC	>RPS3A(+)_CCGTACGCCTAAGTTCTCGCGCGACTCCCACTTCCGCCCTTTTGGCTC	>RPS3A(+)_CGCGACTCCCACTTCCGCCCTTTTGGCTC
chr9	129626155	129626156	NTMT1	163	+	588	73	661	18	202	54	1	55	16	21	48	>NTMT1(+)_GGGCCCGCCCCTAAACGCCC	>NTMT1(+)_GGGCCCGCCCCTAAACGCCCGGAAGTGACGTTGGCGGACAAAGGCAGC	>NTMT1(+)_CGGAAGTGACGTTGGCGGACAAAGGCAGC
chr6	30617242	30617243	PPP1R10	5194	-	467	177	644	968	94	46	9	55	73	199	33	>PPP1R10(-)_TCCGGGTATAAAAGACTCCA	>PPP1R10(-)_TCCGGGTATAAAAGACTCCACCCGAGCGGGCGGCCGCCATTCTGGGGT	>PPP1R10(-)_ACCCGAGCGGGCGGCCGCCATTCTGGGGT
chr13	45341182	45341183	TPT1	698	-	234	373	607	327	91	43	12	55	22	218	63	>TPT1(-)_GTGCCCTCTATATGAGGTTG	>TPT1(-)_GTGCCCTCTATATGAGGTTGGGGAGCGGCTGAGTCGGCCTTTTCCGCC	>TPT1(-)_GGGGAGCGGCTGAGTCGGCCTTTTCCGCC
chr2	3575324	3575325	RPS7	286	+	400	196	596	131	169	52	3	55	45	36	15	>RPS7(+)_GGACGCCGGATTTTGACGTG	>RPS7(+)_GGACGCCGGATTTTGACGTGCTCTCGCGAGATTTGGGTCTCTTCCTAA	>RPS7(+)_GCTCTCGCGAGATTTGGGTCTCTTCCTAA
chr19	34677738	34677739	ZNF302	73	+	303	47	350	10	236	54	1	55	1	14	14	>ZNF302(+)_CCTGGCGGCGGCTTCCAAGC	>ZNF302(+)_CCTGGCGGCGGCTTCCAAGCTAAGGAACGGTTTGGGGCAGTGTCGTTC	>ZNF302(+)_CTAAGGAACGGTTTGGGGCAGTGTCGTTC
chr8	144082633	144082634	GPAA1	30	+	228	63	291	5	230	48	7	55	4	2	2	>GPAA1(+)_GCGCCGTCGCGAGCGTCTCT	>GPAA1(+)_GCGCCGTCGCGAGCGTCTCTGGGACCGGAAGTGCGGGCGAGCGCGGGT	>GPAA1(+)_TGGGACCGGAAGTGCGGGCGAGCGCGGGT
chr7	5592815	5592816	FSCN1	2237	+	474	713	1187	475	91	32	22	54	50	50	12	>FSCN1(+)_CGCCTATAAAATGTCCGGGG	>FSCN1(+)_CGCCTATAAAATGTCCGGGGCGCCGCTAGCTGGGCTTTGTGGAGCGCT	>FSCN1(+)_GCGCCGCTAGCTGGGCTTTGTGGAGCGCT
chr14	102087043	102087044	HSP90AA1	2652	-	372	805	1177	954	101	31	23	54	69	101	21	>HSP90AA1(-)_CCCGTCGCTATATAAGGCAG	>HSP90AA1(-)_CCCGTCGCTATATAAGGCAGGCGCGGGGGTGGCGCGTCAGTTGCTTCA	>HSP90AA1(-)_GGCGCGGGGGTGGCGCGTCAGTTGCTTCA
chr5	58460081	58460082	PLK2	228	-	347	588	935	600	122	38	16	54	83	77	29	>PLK2(-)_CCCGTATATAAGACTTCGCC	>PLK2(-)_CCCGTATATAAGACTTCGCCGAGCGCTCTCACTCGCACAAGTGGACCG	>PLK2(-)_CGAGCGCTCTCACTCGCACAAGTGGACCG
chr3	23917147	23917148	RPL15	183	+	447	427	874	242	153	37	17	54	30	58	17	>RPL15(+)_GGAGGAGCCCAAAAGGCATT	>RPL15(+)_GGAGGAGCCCAAAAGGCATTGTGGGAGTACAGCTCTTTCCTTTCCGTC	>RPL15(+)_TGTGGGAGTACAGCTCTTTCCTTTCCGTC
chr17	64662306	64662307	SMURF2	1415	-	516	303	819	167	119	42	12	54	30	32	21	>SMURF2(-)_GACGAGTGGCGGCGGCGGCC	>SMURF2(-)_GACGAGTGGCGGCGGCGGCCCCAGGTCCCGGGTCCCTCAGACAAGAGG	>SMURF2(-)_CCCAGGTCCCGGGTCCCTCAGACAAGAGG
chr15	43746437	43746438	PDIA3	506	+	447	260	707	97	148	44	10	54	32	30	23	>PDIA3(+)_TGGGGGTTGGGACCTCCGGC	>PDIA3(+)_TGGGGGTTGGGACCTCCGGCTGCAGGTCCGCCTGGGCCAGACGCGCGA	>PDIA3(+)_CTGCAGGTCCGCCTGGGCCAGACGCGCGA
chr18	12884219	12884220	PTPN2	85	-	577	47	624	2	180	51	3	54	5	2	1	>PTPN2(-)_GCGGGGCGCGGCGCGCAGCG	>PTPN2(-)_GCGGGGCGCGGCGCGCAGCGCGCATGCGCCGCAGCGCCAGCGCTCTCC	>PTPN2(-)_GCGCATGCGCCGCAGCGCCAGCGCTCTCC
chr11	809967	809968	RPLP2	195	+	296	305	601	292	164	37	17	54	58	49	30	>RPLP2(+)_GGTAGCGGTTTAACCCCGCC	>RPLP2(+)_GGTAGCGGTTTAACCCCGCCTCTTGCGTCGGCGCCTTCCTTTTCCTCC	>RPLP2(+)_CTCTTGCGTCGGCGCCTTCCTTTTCCTCC
chr9	122905350	122905351	RC3H2	34	-	488	47	535	0	199	50	4	54	3	10	9	>RC3H2(-)_GGAGTAACTTCTCGCGAGAG	>RC3H2(-)_GGAGTAACTTCTCGCGAGAGCTAGATCGGGATCCCTCCAGGTCCGCCT	>RC3H2(-)_GCTAGATCGGGATCCCTCCAGGTCCGCCT
chr19	47745549	47745550	NOP53	20	+	329	74	403	40	212	50	4	54	9	22	18	>NOP53(+)_CAAAGGGGCTTTTTGGGACG	>NOP53(+)_CAAAGGGGCTTTTTGGGACGCCAGTGGCTGAGTTCTTCCTTTGACAAG	>NOP53(+)_GCCAGTGGCTGAGTTCTTCCTTTGACAAG
chr5	138575400	138575401	HSPA9	78	-	251	134	385	35	164	46	8	54	8	27	31	>HSPA9(-)_CAACCCCCGCCCCTCACCCC	>HSPA9(-)_CAACCCCCGCCCCTCACCCCACGTGGTTGGAGGTTTCCAGAAGCGCTG	>HSPA9(-)_CACGTGGTTGGAGGTTTCCAGAAGCGCTG
chr7	56064285	56064286	SUMF2	45	+	298	72	370	6	139	49	5	54	3	2	5	>SUMF2(+)_GCGGTGCATGAGGGCGCATG	>SUMF2(+)_GCGGTGCATGAGGGCGCATGCGCAGCGGGGCCGTGGGTGTACGCGGCG	>SUMF2(+)_GCGCAGCGGGGCCGTGGGTGTACGCGGCG
chr2	150487664	150487665	RND3	2492	-	29	784	813	655	15	5	48	53	50	17	4	>RND3(-)_CGGGCGTATAAAGCCGCGCA	>RND3(-)_CGGGCGTATAAAGCCGCGCAGAGAGCGTGAAACAAAGCAGTCGGCTCG	>RND3(-)_AGAGAGCGTGAAACAAAGCAGTCGGCTCG
chr2	203239017	203239018	CYP20A1	66	+	664	104	768	159	174	49	4	53	12	126	27	>CYP20A1(+)_ACGCTATGCCTTAAATTGGG	>CYP20A1(+)_ACGCTATGCCTTAAATTGGGCCAGGCTGAGGCGCTGCTGCTGGAGCGG	>CYP20A1(+)_GCCAGGCTGAGGCGCTGCTGCTGGAGCGG
chr19	38374787	38374788	PSMD8	385	+	603	150	753	82	188	50	3	53	33	20	22	>PSMD8(+)_GCTGCCGTAAATCAGGCGGT	>PSMD8(+)_GCTGCCGTAAATCAGGCGGTCTGCTTGCCGCATCACGCAAGATGGCGG	>PSMD8(+)_TCTGCTTGCCGCATCACGCAAGATGGCGG
chr3	196867919	196867920	SENP5	194	+	475	248	723	9	245	40	13	53	6	8	8	>SENP5(+)_ACGCGATAGGCCAGCGCCGG	>SENP5(+)_ACGCGATAGGCCAGCGCCGGCGTCGCGGCAGCCGCTTCAGAGGAAGCT	>SENP5(+)_GCGTCGCGGCAGCCGCTTCAGAGGAAGCT
chr12	15911338	15911339	DERA	146	+	547	125	672	17	210	42	11	53	8	18	7	>DERA(+)_TCCAGCTGGCGGGAAGGAGG	>DERA(+)_TCCAGCTGGCGGGAAGGAGGAAGGGCCGGGCGCGGCGCAGAGGCGGGC	>DERA(+)_GAAGGGCCGGGCGCGGCGCAGAGGCGGGC
chr15	74906822	74906823	FAM219B	77	-	478	179	657	21	218	47	6	53	2	7	12	>FAM219B(-)_TCGGCCGGTCACTCTTTCGC	>FAM219B(-)_TCGGCCGGTCACTCTTTCGCCACGGGCGGGGTTGCACCATCCGGCAGG	>FAM219B(-)_CCACGGGCGGGGTTGCACCATCCGGCAGG
chr7	76627278	76627279	POMZP3	577	-	554	54	608	23	207	50	3	53	3	9	6	>POMZP3(-)_ATGACGCGACGCGTGGCGCG	>POMZP3(-)_ATGACGCGACGCGTGGCGCGGTGCACGCTGGGATATTTAAGTCTCCTC	>POMZP3(-)_GGTGCACGCTGGGATATTTAAGTCTCCTC
chr12	120710457	120710458	UNC119B	318	+	389	89	478	46	234	51	2	53	8	8	11	>UNC119B(+)_CCGCTCTCCATAGTTACCGC	>UNC119B(+)_CCGCTCTCCATAGTTACCGCGCTGTGGAGGCGGCGGCCATCTTGGCGG	>UNC119B(+)_CGCTGTGGAGGCGGCGGCCATCTTGGCGG
chr7	140398493	140398494	SLC37A3	128	-	405	43	448	7	152	48	5	53	3	14	7	>SLC37A3(-)_GGAAACCCTGGTCGCACCGC	>SLC37A3(-)_GGAAACCCTGGTCGCACCGCCAGGGGTGAGCTGGCGGCGGGGGAGGCG	>SLC37A3(-)_CCAGGGGTGAGCTGGCGGCGGGGGAGGCG
chr7	72925094	72925095	POM121	911	+	338	107	445	31	190	43	10	53	3	2	7	>POM121(+)_ATGACGCGACGCGCGGCGCG	>POM121(+)_ATGACGCGACGCGCGGCGCGGTGCACGCTGGGATATTTAAGTCTCCTC	>POM121(+)_GGTGCACGCTGGGATATTTAAGTCTCCTC
chr1	20787306	20787307	HP1BP3	129	-	387	45	432	3	190	52	1	53	7	6	5	>HP1BP3(-)_GGGCGCGCGCGGGGCCGCGG	>HP1BP3(-)_GGGCGCGCGCGGGGCCGCGGGTAGGGGGGCGGGGCGGCAGAGCTCGGC	>HP1BP3(-)_GGTAGGGGGGCGGGGCGGCAGAGCTCGGC
chr2	38751358	38751359	SRSF7	689	-	553	629	1182	46	141	37	15	52	4	30	5	>SRSF7(-)_GGCCGCATATATAAACGCGA	>SRSF7(-)_GGCCGCATATATAAACGCGAACCCGGGCTCTTCCTCGTAGTGCCGCCG	>SRSF7(-)_AACCCGGGCTCTTCCTCGTAGTGCCGCCG
chr1	149851061	149851062	HIST2H2AA4	6808	+	305	736	1041	1047	127	28	24	52	105	61	9	>HIST2H2AA4(+)_TTCTGTCTATAAAAAGGTGA	>HIST2H2AA4(+)_TTCTGTCTATAAAAAGGTGAAGCAGCGGCGTTTTCGGCGACTTTCCCG	>HIST2H2AA4(+)_AAGCAGCGGCGTTTTCGGCGACTTTCCCG
chr10	119104116	119104117	FAM45A	493	+	731	218	949	49	201	50	2	52	18	13	13	>FAM45A(+)_GGGGTTCGGGTGCGAGGCCG	>FAM45A(+)_GGGGTTCGGGTGCGAGGCCGGTCCTGCAGGCGGCAGCCAGAGCTGCGC	>FAM45A(+)_GGTCCTGCAGGCGGCAGCCAGAGCTGCGC
chr17	7572827	7572828	EIF4A1	1714	+	335	605	940	573	91	38	14	52	50	208	55	>EIF4A1(+)_GCGCTCTATAAGTTGTCGAT	>EIF4A1(+)_GCGCTCTATAAGTTGTCGATAGGCGGGCACTCCGCCCTAGTTTCTAAG	>EIF4A1(+)_TAGGCGGGCACTCCGCCCTAGTTTCTAAG
chr6	27831559	27831560	HIST1H4K	928	-	289	566	855	135	82	31	21	52	7	15	5	>HIST1H4K(-)_ACTGTCGTATAAAGGCGCTG	>HIST1H4K(-)_ACTGTCGTATAAAGGCGCTGCCTCAGGCCAGAGTCCTCACAAAGCGTT	>HIST1H4K(-)_GCCTCAGGCCAGAGTCCTCACAAAGCGTT
chr4	2756330	2756331	TNIP2	133	-	699	100	799	40	205	51	1	52	10	10	2	>TNIP2(-)_TCCGGGAAGGGCGGCAGCCG	>TNIP2(-)_TCCGGGAAGGGCGGCAGCCGGCGGGGCCCGGGCGCGGAAGTTGCCGGC	>TNIP2(-)_GGCGGGGCCCGGGCGCGGAAGTTGCCGGC
chr1	36088902	36088903	ADPRHL2	113	+	630	137	767	8	248	47	5	52	2	9	11	>ADPRHL2(+)_GTGAGGGCGGCACCGGAAGT	>ADPRHL2(+)_GTGAGGGCGGCACCGGAAGTGGCGAGCAGTCTGCGCGCGGATGGCCGC	>ADPRHL2(+)_TGGCGAGCAGTCTGCGCGCGGATGGCCGC
chr19	18571869	18571870	UBA52	295	+	369	244	613	26	177	44	8	52	5	30	28	>UBA52(+)_ATTAGGTGGTTTCCGGTTCC	>UBA52(+)_ATTAGGTGGTTTCCGGTTCCGCTATCTTCTTTTTCTTCAGCGAGGCGG	>UBA52(+)_CGCTATCTTCTTTTTCTTCAGCGAGGCGG
chr4	121696979	121696980	ANXA5	636	-	340	212	552	102	168	46	6	52	21	34	8	>ANXA5(-)_GCCGGGGTGGGGCCGCTGGC	>ANXA5(-)_GCCGGGGTGGGGCCGCTGGCGTTTCCGTTGCTTGGATCAGTCTAGGTG	>ANXA5(-)_CGTTTCCGTTGCTTGGATCAGTCTAGGTG
chr20	62387103	62387104	RPS21	81	+	310	126	436	175	123	43	9	52	39	38	26	>RPS21(+)_TTGCCCGCCGATATCTCTGC	>RPS21(+)_TTGCCCGCCGATATCTCTGCCGGGTGACTAGCTGCTTCCTTTCTCTCT	>RPS21(+)_CCGGGTGACTAGCTGCTTCCTTTCTCTCT
chr20	44910059	44910060	PABPC1L	38	+	281	27	308	13	165	47	5	52	4	1	4	>PABPC1L(+)_CGGGGGCGGTAAAGGGAAGG	>PABPC1L(+)_CGGGGGCGGTAAAGGGAAGGGGCGGGCCCGCGCCCAGGAAGGAGGGCT	>PABPC1L(+)_GGGCGGGCCCGCGCCCAGGAAGGAGGGCT
chr15	44711512	44711513	B2M	639	+	397	778	1175	568	85	30	21	51	63	72	19	>B2M(+)_GGGCACGCGTTTAATATAAG	>B2M(+)_GGGCACGCGTTTAATATAAGTGGAGGCGTCGCGCTGGCGGGCATTCCT	>B2M(+)_GTGGAGGCGTCGCGCTGGCGGGCATTCCT
chr9	120842918	120842919	PSMD5	106	-	674	140	814	8	183	43	8	51	5	25	14	>PSMD5(-)_CGCCCCGGGAACTGGGCCGC	>PSMD5(-)_CGCCCCGGGAACTGGGCCGCTGGGCCAGCCCCTGCGTCGGGGGGCAAG	>PSMD5(-)_CTGGGCCAGCCCCTGCGTCGGGGGGCAAG
chr2	222861035	222861036	ACSL3	316	+	452	308	760	84	182	38	13	51	11	36	10	>ACSL3(+)_CCGGCCGGGGGTGAGCGTCC	>ACSL3(+)_CCGGCCGGGGGTGAGCGTCCCAGGCGGTTCCGCTCAACAGACGCTGCT	>ACSL3(+)_CCAGGCGGTTCCGCTCAACAGACGCTGCT
chr2	231464483	231464484	NCL	1152	-	285	454	739	205	156	35	16	51	19	52	18	>NCL(-)_CCACAGGCGATTACTGGGCA	>NCL(-)_CCACAGGCGATTACTGGGCAGGCTCAGTCTTTCGCCTCAGTCTCGAGC	>NCL(-)_AGGCTCAGTCTTTCGCCTCAGTCTCGAGC
chr1	35193144	35193145	SFPQ	327	-	359	378	737	877	196	37	14	51	56	62	6	>SFPQ(-)_AGCTGGCCTATATAAGACGA	>SFPQ(-)_AGCTGGCCTATATAAGACGAGGACAAAGGCGGCGCGCCGCCTGTGTCA	>SFPQ(-)_AGGACAAAGGCGGCGCGCCGCCTGTGTCA
chr9	20684284	20684285	FOCAD	411	+	387	299	686	91	203	44	7	51	14	28	17	>FOCAD(+)_GCCACGTCAGGCAGCCGGCG	>FOCAD(+)_GCCACGTCAGGCAGCCGGCGCTGGGCTGAGCTTGTGGCAGAAGGGAGG	>FOCAD(+)_GCTGGGCTGAGCTTGTGGCAGAAGGGAGG
chr17	48908406	48908407	UBE2Z	100	+	423	136	559	0	145	43	8	51	0	4	8	>UBE2Z(+)_AGCACCGTCTGGGCTGTGGA	>UBE2Z(+)_AGCACCGTCTGGGCTGTGGAAGCGGAGGGGGTGGGGACACTCTGGCCC	>UBE2Z(+)_AAGCGGAGGGGGTGGGGACACTCTGGCCC
chr19	54449218	54449219	LENG8	76	+	438	85	523	11	200	49	2	51	3	9	10	>LENG8(+)_AGGACGCCGCGGTCAGGACG	>LENG8(+)_AGGACGCCGCGGTCAGGACGTCGAAGCCAAAGAAGACCAGAGCCAGCC	>LENG8(+)_GTCGAAGCCAAAGAAGACCAGAGCCAGCC
chr14	56579825	56579826	TMEM260	66	+	403	118	521	30	240	46	5	51	7	14	15	>TMEM260(+)_GCGGAGGCTCGACCCGGAAG	>TMEM260(+)_GCGGAGGCTCGACCCGGAAGCCGCCGTGGCCGCCGCACAAGCTGCGCT	>TMEM260(+)_GCCGCCGTGGCCGCCGCACAAGCTGCGCT
chr11	8682791	8682792	RPL27A	187	+	340	179	519	304	207	43	8	51	95	85	57	>RPL27A(+)_CCGTGGCCGATACCTCGCGA	>RPL27A(+)_CCGTGGCCGATACCTCGCGAGACTTGGCGAAGGCCTTCCTTTTTCGTC	>RPL27A(+)_AGACTTGGCGAAGGCCTTCCTTTTTCGTC
chr19	48965308	48965309	FTL	393	+	141	1213	1354	865	42	10	40	50	125	56	8	>FTL(+)_GCGCACCATAAAAGAAGCCG	>FTL(+)_GCGCACCATAAAAGAAGCCGCCCTAGCCACGTCCCCTCGCAGTTCGGC	>FTL(+)_GCCCTAGCCACGTCCCCTCGCAGTTCGGC
chr1	203305518	203305519	BTG2	5843	+	567	598	1165	266	135	30	20	50	36	58	20	>BTG2(+)_GGACCTCCTGAAAAACGCTG	>BTG2(+)_GGACCTCCTGAAAAACGCTGCCCGGGGAAAGTCCGGGCAGAGCCCGAG	>BTG2(+)_GCCCGGGGAAAGTCCGGGCAGAGCCCGAG
chr6	26103932	26103933	HIST1H4C	241	+	171	960	1131	79	80	10	40	50	13	15	2	>HIST1H4C(+)_AGTTTGTATTTAAGGAACTG	>HIST1H4C(+)_AGTTTGTATTTAAGGAACTGTTTCAGTTCATACCTTCCACTGCGATAG	>HIST1H4C(+)_GTTTCAGTTCATACCTTCCACTGCGATAG
chr8	144137814	144137815	HGH1	92	+	742	296	1038	92	168	40	10	50	10	66	17	>HGH1(+)_CAGCGGACCCCTAAGCGGAC	>HGH1(+)_CAGCGGACCCCTAAGCGGACCGCTGGCACCGGTCGGGTGGCAGCAGAG	>HGH1(+)_CCGCTGGCACCGGTCGGGTGGCAGCAGAG
chr19	46788593	46788594	SLC1A5	2424	-	685	331	1016	305	131	40	10	50	56	58	21	>SLC1A5(-)_CCTACCCTTATCCCTGGCAG	>SLC1A5(-)_CCTACCCTTATCCCTGGCAGCTTCCGCTAAACGGGCTCAGAGCCACGC	>SLC1A5(-)_GCTTCCGCTAAACGGGCTCAGAGCCACGC
chr19	49487607	49487608	RPL13A	411	+	319	498	817	507	72	28	22	50	101	90	36	>RPL13A(+)_GTTTCAAGGGATAAGAAACC	>RPL13A(+)_GTTTCAAGGGATAAGAAACCCTGCGACAAAACCTCCTCCTTTTCCAAG	>RPL13A(+)_CCTGCGACAAAACCTCCTCCTTTTCCAAG
chr11	62880895	62880896	SLC3A2	2070	+	416	387	803	94	145	33	17	50	10	14	5	>SLC3A2(+)_CCGCTGCCCCTTCCCAGAGG	>SLC3A2(+)_CCGCTGCCCCTTCCCAGAGGCCGCGCCTGCTGCTGAGCAGATGCAGTA	>SLC3A2(+)_GCCGCGCCTGCTGCTGAGCAGATGCAGTA
chr9	33025274	33025275	DNAJA1	2974	+	452	335	787	871	117	41	9	50	114	374	84	>DNAJA1(+)_GTTCGGCTACAAAAGAGGAC	>DNAJA1(+)_GTTCGGCTACAAAAGAGGACGGCTGCGGCGCGCCGGGCGGAACTTTCC	>DNAJA1(+)_CGGCTGCGGCGCGCCGGGCGGAACTTTCC
chr9	137200740	137200741	TPRN	790	-	525	260	785	83	215	44	6	50	34	43	11	>TPRN(-)_CCAGGCTGGCCGCGGCGGCG	>TPRN(-)_CCAGGCTGGCCGCGGCGGCGGCTGCCACTCCGGCCCTCAGTCCAGCCG	>TPRN(-)_GGCTGCCACTCCGGCCCTCAGTCCAGCCG
chr17	16381090	16381091	UBB	255	+	199	554	753	438	46	30	20	50	46	52	14	>UBB(+)_CACTCGTTGCATAAATTTGC	>UBB(+)_CACTCGTTGCATAAATTTGCGCTCCGCCAGCCCGGAGCATTTAGGGGC	>UBB(+)_CGCTCCGCCAGCCCGGAGCATTTAGGGGC
chr12	49131394	49131395	TUBA1B	2738	-	342	392	734	796	74	32	18	50	104	281	93	>TUBA1B(-)_AGCCGCTACTTAAGAGGCTC	>TUBA1B(-)_AGCCGCTACTTAAGAGGCTCCAGCGCCGGCCCCGCCCTAGTGCGTTAC	>TUBA1B(-)_CCAGCGCCGGCCCCGCCCTAGTGCGTTAC
chr3	49029397	49029398	IMPDH2	171	-	414	297	711	158	104	42	8	50	15	40	7	>IMPDH2(-)_CGGCTGGTTTATATTGGCGC	>IMPDH2(-)_CGGCTGGTTTATATTGGCGCGGCCCAGACGGCAGAGGTCTCTGCGGCG	>IMPDH2(-)_CGGCCCAGACGGCAGAGGTCTCTGCGGCG
chr1	23959822	23959823	PNRC2	113	+	513	157	670	196	148	44	6	50	34	189	101	>PNRC2(+)_AGCCTCCCGGCCCTGCTTCT	>PNRC2(+)_AGCCTCCCGGCCCTGCTTCTGCAGTCGCTGCCGACTCCATTTTGTCGG	>PNRC2(+)_TGCAGTCGCTGCCGACTCCATTTTGTCGG
chr18	50968039	50968040	ELAC1	258	+	539	109	648	25	179	49	1	50	18	37	26	>ELAC1(+)_GGGACCCGGCCGGCGGCGCA	>ELAC1(+)_GGGACCCGGCCGGCGGCGCACTTCCGCCCGGGCGCATTGTAGCCCCGC	>ELAC1(+)_ACTTCCGCCCGGGCGCATTGTAGCCCCGC
chr20	462515	462516	TBC1D20	142	-	535	107	642	9	185	47	3	50	5	4	10	>TBC1D20(-)_CAGCGGGGCGCCTGCGCGCC	>TBC1D20(-)_CAGCGGGGCGCCTGCGCGCCTGCGCGCCGCTGGCCGACGGAGGGGAGC	>TBC1D20(-)_CTGCGCGCCGCTGGCCGACGGAGGGGAGC
chr6	136822591	136822592	PEX7	127	+	556	37	593	14	256	49	1	50	4	13	5	>PEX7(+)_CGGGGCCCACACTTCCGTCC	>PEX7(+)_CGGGGCCCACACTTCCGTCCGGTCTGCCTGGTCTCTCTAACCGCGCCA	>PEX7(+)_CGGTCTGCCTGGTCTCTCTAACCGCGCCA
chr2	195657320	195657321	SLC39A10	2267	+	272	320	592	241	128	28	22	50	49	67	17	>SLC39A10(+)_TAACTATAAAACCCCGATTT	>SLC39A10(+)_TAACTATAAAACCCCGATTTGTTTACATTCCCTCCCCCAGAACCGGCC	>SLC39A10(+)_TGTTTACATTCCCTCCCCCAGAACCGGCC
chr7	92590344	92590345	FAM133B	483	-	458	83	541	42	244	44	6	50	6	5	5	>FAM133B(-)_GGAGGCGGCAAGAGGACCTG	>FAM133B(-)_GGAGGCGGCAAGAGGACCTGCGGCAGGCCCTCTTCGGCAGTCTCTCCG	>FAM133B(-)_GCGGCAGGCCCTCTTCGGCAGTCTCTCCG
chr3	197950194	197950195	RPL35A	101	+	299	196	495	188	219	40	10	50	27	19	9	>RPL35A(+)_TAATCCCACAAGGCCACGCG	>RPL35A(+)_TAATCCCACAAGGCCACGCGGCGGGGCCTCGTCCTTCTCTTACCGCCA	>RPL35A(+)_GGCGGGGCCTCGTCCTTCTCTTACCGCCA
chr15	30903911	30903912	FAN1	39	+	393	85	478	72	226	45	5	50	14	9	15	>FAN1(+)_GCGCGCGGAGCCAGGTGGGA	>FAN1(+)_GCGCGCGGAGCCAGGTGGGAGGTGCGAGGTGGCCGCGCGGGGATCTTG	>FAN1(+)_AGGTGCGAGGTGGCCGCGCGGGGATCTTG
chr11	66843447	66843448	RCE1	78	+	368	54	422	16	244	48	2	50	16	9	4	>RCE1(+)_CCTCCCTGGGACTGCGTCAC	>RCE1(+)_CCTCCCTGGGACTGCGTCACTGGTGCGCGCCGCGGGTCAGGGCGCAAT	>RCE1(+)_CTGGTGCGCGCCGCGGGTCAGGGCGCAAT
chr22	19447699	19447700	C22orf39	55	-	311	106	417	8	156	46	4	50	5	3	5	>C22orf39(-)_TCATTGGCTGGCGGACTGAG	>C22orf39(-)_TCATTGGCTGGCGGACTGAGGGGCGGGCTTGGCGCGCCGGTCGCCCAG	>C22orf39(-)_GGGGCGGGCTTGGCGCGCCGGTCGCCCAG
chr19	8308309	8308310	CD320	31	-	306	44	350	16	174	49	1	50	8	8	4	>CD320(-)_GCGCAGGGATAAGAGAGCGG	>CD320(-)_GCGCAGGGATAAGAGAGCGGTCTGGACAGCGCGTGGCCGGCGCCGCTG	>CD320(-)_GTCTGGACAGCGCGTGGCCGGCGCCGCTG
chr19	14572062	14572063	NDUFB7	68	-	119	35	154	15	240	50	0	50	2	4	5	>NDUFB7(-)_GCCTAAATGACCCGGAAGCT	>NDUFB7(-)_GCCTAAATGACCCGGAAGCTGTGTCTGACTGAGGGGTCAGTGGTTCCG	>NDUFB7(-)_TGTGTCTGACTGAGGGGTCAGTGGTTCCG
chr19	55675227	55675228	EPN1	47	+	111	33	144	1	182	45	5	50	1	7	6	>EPN1(+)_GCGCGGCAATTTCCGCTTCC	>EPN1(+)_GCGCGGCAATTTCCGCTTCCGGTCCGTCGCCTCCTTCTGTTGCTTCCC	>EPN1(+)_CGGTCCGTCGCCTCCTTCTGTTGCTTCCC
chr17	7484369	7484370	POLR2A	5279	+	472	1174	1646	567	76	23	26	49	71	84	7	>POLR2A(+)_GAATCTATAAGAAGCGTCGT	>POLR2A(+)_GAATCTATAAGAAGCGTCGTTCAGCGAGTTCGCTGCTCAGAAGCGCCG	>POLR2A(+)_TTCAGCGAGTTCGCTGCTCAGAAGCGCCG
chr14	31420549	31420550	HEATR5A	691	-	553	505	1058	106	118	39	10	49	13	27	14	>HEATR5A(-)_CACCTCAATGCCTCGCTGTC	>HEATR5A(-)_CACCTCAATGCCTCGCTGTCGCCGCCGCCGGCAATTCCAGACTCTGCT	>HEATR5A(-)_CGCCGCCGCCGGCAATTCCAGACTCTGCT
chr15	69452820	69452821	RPLP1	582	+	273	744	1017	668	158	28	21	49	111	41	11	>RPLP1(+)_GTGGACACATAAGAGGCTGC	>RPLP1(+)_GTGGACACATAAGAGGCTGCGTATAGGCGCGAGAGCCCCTTTCCTCAG	>RPLP1(+)_CGTATAGGCGCGAGAGCCCCTTTCCTCAG
chr21	17819355	17819356	C21orf91	1024	-	508	492	1000	24	160	37	12	49	8	19	13	>C21orf91(-)_GGCGCGCGGCGGCCGCCTCT	>C21orf91(-)_GGCGCGCGGCGGCCGCCTCTGCTGCGGCCGGAAACAATAGTGGAGGAA	>C21orf91(-)_TGCTGCGGCCGGAAACAATAGTGGAGGAA
chr11	34916640	34916641	PDHX	451	+	687	269	956	56	168	45	4	49	2	20	2	>PDHX(+)_TTGATGCTGGACATCAGGCT	>PDHX(+)_TTGATGCTGGACATCAGGCTGTGCTGCGGGCAGCCAGTGAGAAGGCCG	>PDHX(+)_TGTGCTGCGGGCAGCCAGTGAGAAGGCCG
chr10	75401763	75401764	ZNF503	866	-	376	449	825	97	130	32	17	49	13	8	8	>ZNF503(-)_CCCTTGGTGCAGCTGCTTTT	>ZNF503(-)_CCCTTGGTGCAGCTGCTTTTGAAGTGAGTTTCCTCGCCAGAGCCCCGG	>ZNF503(-)_TGAAGTGAGTTTCCTCGCCAGAGCCCCGG
chr9	36190962	36190963	CLTA	133	+	616	182	798	30	140	44	5	49	7	40	29	>CLTA(+)_TTTACCCGTCTCCCTCCTGG	>CLTA(+)_TTTACCCGTCTCCCTCCTGGCGCTTGTCCTCCTCTCCCAGTCGGCACC	>CLTA(+)_GCGCTTGTCCTCCTCTCCCAGTCGGCACC
chr6	44247096	44247097	HSP90AB1	1363	+	239	533	772	608	71	31	18	49	80	105	21	>HSP90AB1(+)_GTGCTTCGCCTTATATAGGG	>HSP90AB1(+)_GTGCTTCGCCTTATATAGGGCGACTTGGGGCACGCAGTAGCTCTCTCG	>HSP90AB1(+)_GCGACTTGGGGCACGCAGTAGCTCTCTCG
chr2	197499834	197499835	HSPD1	133	-	400	354	754	102	156	36	13	49	13	37	23	>HSPD1(-)_CGGGCTCATTGCGGTGTGCG	>HSPD1(-)_CGGGCTCATTGCGGTGTGCGCCCTGCACTCTGTCCCTCACTCGCCGCC	>HSPD1(-)_GCCCTGCACTCTGTCCCTCACTCGCCGCC
chr22	19854815	19854816	GNB1L	463	-	481	253	734	76	185	42	7	49	11	24	14	>GNB1L(-)_TCCTAGGAGCAGGCGTTCCC	>GNB1L(-)_TCCTAGGAGCAGGCGTTCCCGACTCCGGCAAGAGGGTCAGTGTGGAGG	>GNB1L(-)_CGACTCCGGCAAGAGGGTCAGTGTGGAGG
chr22	19854815	19854816	RTL10	463	-	481	253	734	76	185	42	7	49	11	24	14	>RTL10(-)_TCCTAGGAGCAGGCGTTCCC	>RTL10(-)_TCCTAGGAGCAGGCGTTCCCGACTCCGGCAAGAGGGTCAGTGTGGAGG	>RTL10(-)_CGACTCCGGCAAGAGGGTCAGTGTGGAGG
chr11	3797551	3797552	NUP98	85	-	536	185	721	63	187	44	5	49	8	16	9	>NUP98(-)_TCCGCAACGAGCCTCTGACG	>NUP98(-)_TCCGCAACGAGCCTCTGACGCCGGGCGGCGTGTGACGCAGTCGGGCCC	>NUP98(-)_GCCGGGCGGCGTGTGACGCAGTCGGGCCC
chr16	234859	234860	FAM234A	71	+	600	110	710	9	232	46	3	49	2	12	6	>FAM234A(+)_CCAGCGGCGCGGTCGGGTGA	>FAM234A(+)_CCAGCGGCGCGGTCGGGTGAGAGGCCGCGGCGGCAGGTGAGTGAGCGC	>FAM234A(+)_AGAGGCCGCGGCGGCAGGTGAGTGAGCGC
chr2	101002292	101002293	RPL31	209	+	407	237	644	192	163	38	11	49	40	104	36	>RPL31(+)_CTGCGGCTTTCCTTCTCCCA	>RPL31(+)_CTGCGGCTTTCCTTCTCCCACAATCCTTCGCGCTCTTCCTTTCCAACT	>RPL31(+)_ACAATCCTTCGCGCTCTTCCTTTCCAACT
chr17	39200312	39200313	RPL19	164	+	451	177	628	90	184	44	5	49	23	49	36	>RPL19(+)_TCCCCTTCGCAGATAATGGG	>RPL19(+)_TCCCCTTCGCAGATAATGGGAGGAGCCGGGCCCGAGCGAGCTCTTTCC	>RPL19(+)_GAGGAGCCGGGCCCGAGCGAGCTCTTTCC
chr13	113490690	113490691	DCUN1D2	222	-	527	52	579	1	227	48	1	49	7	0	6	>DCUN1D2(-)_AGCCGCCGCCGCGCCTGCGC	>DCUN1D2(-)_AGCCGCCGCCGCGCCTGCGCAGAAGGCCGGGGCCGGCCAGAAGCGGGC	>DCUN1D2(-)_CAGAAGGCCGGGGCCGGCCAGAAGCGGGC
chr1	3796490	3796491	LRRC47	54	-	484	85	569	11	268	45	4	49	6	12	24	>LRRC47(-)_CGCTGCCCCGGAAGCACCCT	>LRRC47(-)_CGCTGCCCCGGAAGCACCCTGGTGGGTGGGTGCCTGCCAGCAGCTGAG	>LRRC47(-)_TGGTGGGTGGGTGCCTGCCAGCAGCTGAG
chr2	239401645	239401646	HDAC4	300	-	487	50	537	8	221	49	0	49	5	3	3	>HDAC4(-)_CGCCTCCGTGCGCACGCAGC	>HDAC4(-)_CGCCTCCGTGCGCACGCAGCACCACGTGACCCACTGCCAGTATCCAAG	>HDAC4(-)_CACCACGTGACCCACTGCCAGTATCCAAG
chr7	102572582	102572583	POLR2J3	159	-	392	122	514	13	452	41	8	49	15	15	6	>POLR2J3(-)_GGGTTTGCCCCGCCGGAGTA	>POLR2J3(-)_GGGTTTGCCCCGCCGGAGTAATCCGGAAGAGGCCTCTTATTAGGGCTC	>POLR2J3(-)_AATCCGGAAGAGGCCTCTTATTAGGGCTC
chr14	49586375	49586376	RPS29	273	-	319	193	512	156	167	42	7	49	22	54	17	>RPS29(-)_CAAAAATTTGAAGAGCGCAT	>RPS29(-)_CAAAAATTTGAAGAGCGCATGCGTGGGCCAGCTTCTTCCTTTTACCTC	>RPS29(-)_TGCGTGGGCCAGCTTCTTCCTTTTACCTC
chr10	73414057	73414058	ANXA7	72	-	279	108	387	4	197	44	5	49	2	1	4	>ANXA7(-)_CGAGACGCCCCGCCCACCCT	>ANXA7(-)_CGAGACGCCCCGCCCACCCTGGGCCCGCCCCCGGCTCCATCTTGCGGG	>ANXA7(-)_TGGGCCCGCCCCCGGCTCCATCTTGCGGG
chr16	23510446	23510447	GGA2	146	-	303	64	367	16	131	48	1	49	5	7	6	>GGA2(-)_AGAGGAGAGCGCCAGGACGC	>GGA2(-)_AGAGGAGAGCGCCAGGACGCTACAGCGGCTGAAGAGGCAGTGGCGCCC	>GGA2(-)_CTACAGCGGCTGAAGAGGCAGTGGCGCCC
chr12	53676062	53676063	ATP5MC2	32	-	282	72	354	4	244	46	3	49	7	5	3	>ATP5MC2(-)_GCTCTTCCCGCTGCTCCGCC	>ATP5MC2(-)_GCTCTTCCCGCTGCTCCGCCCCTCTCTGTCTTCTCTGCAGTGGGAGCA	>ATP5MC2(-)_CCCTCTCTGTCTTCTCTGCAGTGGGAGCA
chr11	34105628	34105629	NAT10	99	+	177	103	280	9	166	40	9	49	1	7	5	>NAT10(+)_TCTGCGACTTTAATGCGCTT	>NAT10(+)_TCTGCGACTTTAATGCGCTTGCGCACGTGCTGTCTACCAGTTCCTGAG	>NAT10(+)_TGCGCACGTGCTGTCTACCAGTTCCTGAG
chr17	36591878	36591879	DHRS11	16	+	155	38	193	11	151	43	6	49	1	3	3	>DHRS11(+)_CGGGGGCCTGAGGGTGGAGT	>DHRS11(+)_CGGGGGCCTGAGGGTGGAGTCCCGGCCGGAGGCAGGCCGGGACTCTGG	>DHRS11(+)_TCCCGGCCGGAGGCAGGCCGGGACTCTGG
chr17	58659305	58659306	TEX14	2350	-	31	1253	1284	3	8	3	45	48	0	0	0	>TEX14(-)_TGAGGACGATGGTAAGGTAT	>TEX14(-)_TGAGGACGATGGTAAGGTATTAGCAATATTAAGTAAATAATGTCTTTG	>TEX14(-)_TTAGCAATATTAAGTAAATAATGTCTTTG
chr5	138338265	138338266	FAM53C	3478	+	650	630	1280	333	92	37	11	48	34	103	33	>FAM53C(+)_GCGCCTTTTAAGGGCACCGT	>FAM53C(+)_GCGCCTTTTAAGGGCACCGTGGGGCGAACCGAGCGCTCAGAGCTGCTC	>FAM53C(+)_TGGGGCGAACCGAGCGCTCAGAGCTGCTC
chr13	106535658	106535659	EFNB2	585	-	415	676	1091	126	166	25	23	48	14	27	8	>EFNB2(-)_CCGCGTTTATAGCGCTCTGA	>EFNB2(-)_CCGCGTTTATAGCGCTCTGACAGCGCGGCGGCCGCGCTGACTCTCCTC	>EFNB2(-)_ACAGCGCGGCGGCCGCGCTGACTCTCCTC
chr1	149832656	149832657	HIST2H4A	5113	+	191	822	1013	212	109	18	30	48	19	18	3	>HIST2H4A(+)_ACTCTTGTATATCAGGGGAA	>HIST2H4A(+)_ACTCTTGTATATCAGGGGAAGACGGTGCTCGCCTTGACAGAAGCTGTC	>HIST2H4A(+)_AGACGGTGCTCGCCTTGACAGAAGCTGTC
chr3	49021504	49021505	DALRD3	572	-	315	597	912	607	148	30	18	48	51	94	28	>DALRD3(-)_GGTTTCTCCTTAAAATGGCT	>DALRD3(-)_GGTTTCTCCTTAAAATGGCTCCAAGTCTGCAGGCAGCCAGAGCAAGCG	>DALRD3(-)_TCCAAGTCTGCAGGCAGCCAGAGCAAGCG
chr16	87392335	87392336	MAP1LC3B	590	+	605	222	827	103	188	37	11	48	19	126	51	>MAP1LC3B(+)_CTGCGGGCTGAGGAGATACA	>MAP1LC3B(+)_CTGCGGGCTGAGGAGATACAAGGGAAGTGGCTATCGCCAGAGTCGGAT	>MAP1LC3B(+)_AAGGGAAGTGGCTATCGCCAGAGTCGGAT
chr2	96536751	96536752	ARID5A	748	+	435	353	788	62	181	33	15	48	8	45	25	>ARID5A(+)_TGCGGGGAGGTGGCCGGCGG	>ARID5A(+)_TGCGGGGAGGTGGCCGGCGGGCCGCGCCGCGAGCCAGTATCTCAGAGA	>ARID5A(+)_GGCCGCGCCGCGAGCCAGTATCTCAGAGA
chr9	107489765	107489766	KLF4	3196	-	284	481	765	716	51	28	20	48	55	76	28	>KLF4(-)_AGGAAGTTATAAGTAAGGAA	>KLF4(-)_AGGAAGTTATAAGTAAGGAACGCGCGCCGGCGGCCGGCAGTTTCCCGA	>KLF4(-)_ACGCGCGCCGGCGGCCGGCAGTTTCCCGA
chr11	9461112	9461113	ZNF143	1170	+	520	244	764	402	143	38	10	48	31	90	24	>ZNF143(+)_AGGTTCGTATATAAATGTGT	>ZNF143(+)_AGGTTCGTATATAAATGTGTTTTTACCCAGTGTGCATTATTCTCCGCC	>ZNF143(+)_TTTTTACCCAGTGTGCATTATTCTCCGCC
chr16	56932146	56932147	HERPUD1	777	+	314	436	750	1247	124	30	18	48	134	218	65	>HERPUD1(+)_CTTCTATAAAAGGCGCCCGA	>HERPUD1(+)_CTTCTATAAAAGGCGCCCGAAGCGGGGGCGCGCGCCCCAGAGACGTGA	>HERPUD1(+)_AAGCGGGGGCGCGCGCCCCAGAGACGTGA
chr1	92832040	92832041	RPL5	141	+	509	232	741	265	212	41	7	48	63	46	21	>RPL5(+)_TCCGCGCTACATACTGCGCC	>RPL5(+)_TCCGCGCTACATACTGCGCCTGCGCAAGGGCTGTGGCCCTTTTCCCAC	>RPL5(+)_CTGCGCAAGGGCTGTGGCCCTTTTCCCAC
chr13	114314537	114314538	CHAMP1	277	+	565	161	726	18	193	43	5	48	23	2	4	>CHAMP1(+)_CTCGCGCACCCGGATCCCGG	>CHAMP1(+)_CTCGCGCACCCGGATCCCGGCTCCTGCATCCAGTCGCCATTCGGGAGG	>CHAMP1(+)_GCTCCTGCATCCAGTCGCCATTCGGGAGG
chr7	44606626	44606627	OGDH	158	+	590	96	686	43	179	48	0	48	8	48	33	>OGDH(+)_CGAGAGTTTGGAGCCCCGGA	>OGDH(+)_CGAGAGTTTGGAGCCCCGGAGTGGGGTGTCGGCGCCTCATTCGGGTGG	>OGDH(+)_AGTGGGGTGTCGGCGCCTCATTCGGGTGG
chr15	83067239	83067240	BTBD1	114	-	595	87	682	13	175	37	11	48	9	5	5	>BTBD1(-)_TGCGGAGGCGCGAGGCCCCC	>BTBD1(-)_TGCGGAGGCGCGAGGCCCCCGGAAGCGCCTTTCCCGGAAGGCAGGGAG	>BTBD1(-)_CGGAAGCGCCTTTCCCGGAAGGCAGGGAG
chr22	50201010	50201011	SELENOO	342	+	566	94	660	3	174	44	4	48	10	2	7	>SELENOO(+)_CGGGACGCGCGGGGCGGGGC	>SELENOO(+)_CGGGACGCGCGGGGCGGGGCTTCCGGGCGGGGCAGGCTGGCTTCCGGC	>SELENOO(+)_CTTCCGGGCGGGGCAGGCTGGCTTCCGGC
chr1	1231971	1231972	SDF4	416	-	532	107	639	28	262	44	4	48	11	6	3	>SDF4(-)_CGCCCGTTCGCACCGCCCCC	>SDF4(-)_CGCCCGTTCGCACCGCCCCCGCCCGCAAGAAAGATGGCAGTGGCCTGA	>SDF4(-)_CGCCCGCAAGAAAGATGGCAGTGGCCTGA
chr19	49085450	49085451	SNRNP70	210	+	497	121	618	3	213	42	6	48	8	4	12	>SNRNP70(+)_GGCGGAGGGATTTGCGGCCG	>SNRNP70(+)_GGCGGAGGGATTTGCGGCCGGGACCCACCCCCTGCTCCAGTCGCTATC	>SNRNP70(+)_GGGACCCACCCCCTGCTCCAGTCGCTATC
chr3	15206245	15206246	CAPN7	66	+	508	107	615	7	284	47	1	48	2	2	4	>CAPN7(+)_CCAGGCTGCGCCTGCGTCGG	>CAPN7(+)_CCAGGCTGCGCCTGCGTCGGGCGGCTGGTGGGCGGGGCGAGGGCCGCT	>CAPN7(+)_GGCGGCTGGTGGGCGGGGCGAGGGCCGCT
chr3	39153590	39153591	CSRNP1	878	-	363	247	610	68	124	33	15	48	24	13	2	>CSRNP1(-)_CGAGGAGGGCGGAGCGGCGG	>CSRNP1(-)_CGAGGAGGGCGGAGCGGCGGGCGGGGCTGGGCGCAGGCAGTCTCCCGC	>CSRNP1(-)_GGCGGGGCTGGGCGCAGGCAGTCTCCCGC
chr19	11597482	11597483	ZNF627	204	+	412	178	590	45	180	36	12	48	10	33	22	>ZNF627(+)_AGAGGAGGGCAGGGCCTGCG	>ZNF627(+)_AGAGGAGGGCAGGGCCTGCGCCTCCCTACGGAGCCTTTGTTTCTGGCG	>ZNF627(+)_GCCTCCCTACGGAGCCTTTGTTTCTGGCG
chr16	69187174	69187175	SNTB2	210	+	406	155	561	35	218	40	8	48	4	23	16	>SNTB2(+)_AGAGGGAAGCGCCGAGGCTG	>SNTB2(+)_AGAGGGAAGCGCCGAGGCTGCCTGACTGGAATGAGGGTAGCTGCGGCG	>SNTB2(+)_GCCTGACTGGAATGAGGGTAGCTGCGGCG
chr16	74607096	74607097	GLG1	258	-	370	184	554	18	224	44	4	48	13	7	3	>GLG1(-)_CGCGGCGCCGGCGAGTGCGT	>GLG1(-)_CGCGGCGCCGGCGAGTGCGTCGAGCTCGCCGCGGACTCAAGATGGCGG	>GLG1(-)_TCGAGCTCGCCGCGGACTCAAGATGGCGG
chr7	151232515	151232516	CHPF2	156	+	454	99	553	10	179	47	1	48	7	17	5	>CHPF2(+)_GCGGAAGAGGAAGCTGCGGA	>CHPF2(+)_GCGGAAGAGGAAGCTGCGGACAGGGGCTGTGAGGTGGCAGCGGCTGCA	>CHPF2(+)_ACAGGGGCTGTGAGGTGGCAGCGGCTGCA
chr5	181243901	181243902	RACK1	69	-	280	255	535	29	123	29	19	48	9	24	33	>RACK1(-)_GGGTATTTCCGGTTCCGGCG	>RACK1(-)_GGGTATTTCCGGTTCCGGCGGGGGGCTTTTCTCTCTCTCTTTCACTGC	>RACK1(-)_GGGGGGCTTTTCTCTCTCTCTTTCACTGC
chr1	43368010	43368011	ELOVL1	96	-	373	93	466	10	188	44	4	48	16	11	10	>ELOVL1(-)_CCGCCCCTCCCCCTCTGGTG	>ELOVL1(-)_CCGCCCCTCCCCCTCTGGTGACAGAAAGTCGGCCCAGCAGATGAGGAA	>ELOVL1(-)_GACAGAAAGTCGGCCCAGCAGATGAGGAA
chr6	159693267	159693268	SOD2	254	-	222	210	432	44	118	19	29	48	9	10	1	>SOD2(-)_CGCAGCTGGGGTCGCGGCCC	>SOD2(-)_CGCAGCTGGGGTCGCGGCCCTGCTCCCCGCGCTTTCTTAAGGCCCGCG	>SOD2(-)_CTGCTCCCCGCGCTTTCTTAAGGCCCGCG
chr17	50201628	50201629	COL1A1	8755	-	263	992	1255	567	88	12	35	47	33	46	6	>COL1A1(-)_AGGACAGTATAAAAGGGGCC	>COL1A1(-)_AGGACAGTATAAAAGGGGCCCGGGCCAGTCGTCGGAGCAGACGGGAGT	>COL1A1(-)_CCGGGCCAGTCGTCGGAGCAGACGGGAGT
chr8	11868086	11868087	CTSB	836	-	520	729	1249	126	116	25	22	47	20	46	14	>CTSB(-)_GGAGGGTACTTAGGGCCGGG	>CTSB(-)_GGAGGGTACTTAGGGCCGGGGCTGGCCCAGGCTACGGCGGCTGCAGGG	>CTSB(-)_GGCTGGCCCAGGCTACGGCGGCTGCAGGG
chr1	39576789	39576790	PABPC4	355	-	382	671	1053	507	96	29	18	47	50	81	25	>PABPC4(-)_CGGGCGGGTATAAATGGAGC	>PABPC4(-)_CGGGCGGGTATAAATGGAGCGGTGGCTCCCTCGGCCGCCTCTCTCCGC	>PABPC4(-)_CGGTGGCTCCCTCGGCCGCCTCTCTCCGC
chr17	78360076	78360077	SOCS3	1602	-	451	559	1010	401	197	35	12	47	48	77	14	>SOCS3(-)_GCGGCCGCCTATATACCCGC	>SOCS3(-)_GCGGCCGCCTATATACCCGCGAGCGCGGCCTCCGCGGCGGCTCCGACT	>SOCS3(-)_CGAGCGCGGCCTCCGCGGCGGCTCCGACT
chr1	244653125	244653126	DESI2	191	+	696	212	908	69	208	41	6	47	20	8	3	>DESI2(+)_TCCGGAGCGGGCCGCCAACG	>DESI2(+)_TCCGGAGCGGGCCGCCAACGGTCCGGCCCCGTCCGCACAGACGCTCCT	>DESI2(+)_GGTCCGGCCCCGTCCGCACAGACGCTCCT
chr9	133348221	133348222	RPL7A	227	+	565	291	856	320	205	41	6	47	80	46	19	>RPL7A(+)_GAGGCCGCATACATATTACC	>RPL7A(+)_GAGGCCGCATACATATTACCCACAATTCCCTTTCCTTTCTCTCTCCTC	>RPL7A(+)_CCACAATTCCCTTTCCTTTCTCTCTCCTC
chr19	2269519	2269520	OAZ1	727	+	305	549	854	1009	98	28	19	47	133	284	54	>OAZ1(+)_GCGCAGCATCTATAAAGGCG	>OAZ1(+)_GCGCAGCATCTATAAAGGCGGGCGGCGGCAGAGGCGCCATTTTGCGAA	>OAZ1(+)_GGGCGGCGGCAGAGGCGCCATTTTGCGAA
chr20	50190829	50190830	CEBPB	2743	+	304	514	818	693	105	30	17	47	42	21	4	>CEBPB(+)_GGCCGCCCTTATAAATAACC	>CEBPB(+)_GGCCGCCCTTATAAATAACCGGGCTCAGGAGAAACTTTAGCGAGTCAG	>CEBPB(+)_CGGGCTCAGGAGAAACTTTAGCGAGTCAG
chr22	39520562	39520563	ATF4	749	+	333	483	816	1411	92	37	10	47	164	525	158	>ATF4(+)_CGAAGTCTATAAAGGGCCGG	>ATF4(+)_CGAAGTCTATAAAGGGCCGGCGGGCGGCCACGGCAGCCATTTCTACTT	>ATF4(+)_GCGGGCGGCCACGGCAGCCATTTCTACTT
chr7	44796680	44796681	PPIA	342	+	331	467	798	531	84	29	18	47	67	158	19	>PPIA(+)_AACGTGGTATAAAAGGGGCG	>PPIA(+)_AACGTGGTATAAAAGGGGCGGGAGGCCAGGCTCGTGCCGTTTTGCAGA	>PPIA(+)_GGGAGGCCAGGCTCGTGCCGTTTTGCAGA
chr22	37560481	37560482	CDC42EP1	1540	+	400	370	770	90	127	39	8	47	24	54	5	>CDC42EP1(+)_CCGGATCCAGCCCGCGGAGC	>CDC42EP1(+)_CCGGATCCAGCCCGCGGAGCCCGCGGCCAGGGCGGCGCAGACCGGCCC	>CDC42EP1(+)_CCCGCGGCCAGGGCGGCGCAGACCGGCCC
chr9	98056738	98056739	NANS	303	+	526	214	740	49	249	41	6	47	11	62	29	>NANS(+)_GGGCTGGCGTGTGGGTCTCG	>NANS(+)_GGGCTGGCGTGTGGGTCTCGCAGCGTTGCTCACAGAACAGAGTAGAGG	>NANS(+)_GCAGCGTTGCTCACAGAACAGAGTAGAGG
chr19	47778702	47778703	SELENOW	120	+	437	237	674	152	112	40	7	47	21	19	16	>SELENOW(+)_AGCCGAGGCTCCATCCTTTC	>SELENOW(+)_AGCCGAGGCTCCATCCTTTCTGCGCAGGTTCCCGCCGCACTCGCGCAG	>SELENOW(+)_CTGCGCAGGTTCCCGCCGCACTCGCGCAG
chr11	10541175	10541176	RNF141	97	-	479	173	652	27	208	42	5	47	3	4	2	>RNF141(-)_GTCCCGGCCTGAGTCGCGGC	>RNF141(-)_GTCCCGGCCTGAGTCGCGGCCACCCGCAGGTCTGAGCTGTGGGCTGAG	>RNF141(-)_CCACCCGCAGGTCTGAGCTGTGGGCTGAG
chr6	36027810	36027811	MAPK14	255	+	379	249	628	71	195	38	9	47	14	8	3	>MAPK14(+)_GAGGCTCCCGTTTGCTGGCT	>MAPK14(+)_GAGGCTCCCGTTTGCTGGCTCTTGGAACCGCGACCACTGGAGCCTTAG	>MAPK14(+)_TCTTGGAACCGCGACCACTGGAGCCTTAG
chr3	51385290	51385291	MANF	513	+	424	187	611	173	163	43	4	47	30	108	64	>MANF(+)_CGGGACTTGGAGGCGGTGCG	>MANF(+)_CGGGACTTGGAGGCGGTGCGGCGCGGCGGGTGCGGTTCAGTCGGTCGG	>MANF(+)_GGCGCGGCGGGTGCGGTTCAGTCGGTCGG
chr17	1456231	1456232	CRK	67	-	482	84	566	18	212	46	1	47	11	5	9	>CRK(-)_GTCATTTCCGGAGGGGGAGG	>CRK(-)_GTCATTTCCGGAGGGGGAGGCCCGCGGCTGCCGCCGCCATTTCGGGCG	>CRK(-)_GCCCGCGGCTGCCGCCGCCATTTCGGGCG
chr17	38853735	38853736	RPL23	265	-	324	205	529	280	160	37	10	47	29	69	21	>RPL23(-)_GTTAAAGTTCATATCCCAGT	>RPL23(-)_GTTAAAGTTCATATCCCAGTGTCCTTTGAATCGACTTCCTTTTTTCTT	>RPL23(-)_TGTCCTTTGAATCGACTTCCTTTTTTCTT
chr16	88811927	88811928	APRT	658	-	441	86	527	9	142	44	3	47	8	21	26	>APRT(-)_CTCGTGGCGGTCCCGCCCGT	>APRT(-)_CTCGTGGCGGTCCCGCCCGTCCCCGCGCAGGCGCGCTCGGGCTGCCGC	>APRT(-)_TCCCCGCGCAGGCGCGCTCGGGCTGCCGC
chr1	151254757	151254758	PSMD4	34	+	315	87	402	4	232	38	9	47	3	1	6	>PSMD4(+)_CAATTGGAGGAGTTGTTGTT	>PSMD4(+)_CAATTGGAGGAGTTGTTGTTAGGCCGTCCCGGAGACCCGGTCGGGAGG	>PSMD4(+)_TAGGCCGTCCCGGAGACCCGGTCGGGAGG
chr12	132828841	132828842	GOLGA3	54	-	164	62	226	18	51	33	14	47	7	0	0	>GOLGA3(-)_TCGCCCCGCCCCTCTCACGG	>GOLGA3(-)_TCGCCCCGCCCCTCTCACGGCCACGTCTCCGCCGGAGCATCCGGGCCG	>GOLGA3(-)_GCCACGTCTCCGCCGGAGCATCCGGGCCG
chr13	51453030	51453031	INTS6	914	-	253	902	1155	685	133	23	23	46	109	34	13	>INTS6(-)_CCGAGTTAAAACCGGAGTGT	>INTS6(-)_CCGAGTTAAAACCGGAGTGTGAGAGAGAAAAGCGCTTCAGTAGCGAGA	>INTS6(-)_TGAGAGAGAAAAGCGCTTCAGTAGCGAGA
chr2	84905655	84905656	TMSB10	1638	+	358	741	1099	486	144	24	22	46	18	58	8	>TMSB10(+)_GCGGCGTATATAAGGCTAGG	>TMSB10(+)_GCGGCGTATATAAGGCTAGGGGCGGGCGCCGCTCTTTTGTTTCTTGCT	>TMSB10(+)_GGGCGGGCGCCGCTCTTTTGTTTCTTGCT
chr9	129178256	129178257	IER5L	3010	-	239	836	1075	437	121	19	27	46	50	40	18	>IER5L(-)_CCCGGCTAAATAGCTGGGGC	>IER5L(-)_CCCGGCTAAATAGCTGGGGCCGGGGCCGGCCGAGACTCATTGCTTTGG	>IER5L(-)_CCGGGGCCGGCCGAGACTCATTGCTTTGG
chr12	122078755	122078756	MLXIP	1546	+	849	113	962	49	182	41	5	46	18	9	1	>MLXIP(+)_GAGCCCTCCCCCTCCCGCCG	>MLXIP(+)_GAGCCCTCCCCCTCCCGCCGCGCCGCGCGCTCGCGGACAGTCGGCGCG	>MLXIP(+)_GCGCCGCGCGCTCGCGGACAGTCGGCGCG
chr15	50765706	50765707	SPPL2A	97	-	912	23	935	13	212	46	0	46	4	9	6	>SPPL2A(-)_CGGGGGTTTCCGCATCTTAC	>SPPL2A(-)_CGGGGGTTTCCGCATCTTACGGGCGGGGCCGGAAGAGGAAGTCGCGCT	>SPPL2A(-)_CGGGCGGGGCCGGAAGAGGAAGTCGCGCT
chr6	132814568	132814569	RPS12	707	+	260	619	879	157	72	23	23	46	21	102	16	>RPS12(+)_GAAAAACCCTTAAATACCGG	>RPS12(+)_GAAAAACCCTTAAATACCGGCATGCGTGCGGATGAGGCCTCTTTCCCT	>RPS12(+)_GCATGCGTGCGGATGAGGCCTCTTTCCCT
chr6	27810050	27810051	HIST1H3H	930	+	227	584	811	351	139	26	20	46	28	41	4	>HIST1H3H(+)_TCTCACTATAAATAAGCGGC	>HIST1H3H(+)_TCTCACTATAAATAAGCGGCTAGCTTTCTCTTTCTCCTGAAGTGAATC	>HIST1H3H(+)_CTAGCTTTCTCTTTCTCCTGAAGTGAATC
chr19	16324827	16324828	KLF2	52	+	289	488	777	669	108	24	22	46	115	199	56	>KLF2(+)_GCGCCTATAAGGCTTGGGCG	>KLF2(+)_GCGCCTATAAGGCTTGGGCGGGCCCGGCCGCGGCCCACAGAGCCGTCC	>KLF2(+)_GGGCCCGGCCGCGGCCCACAGAGCCGTCC
chr12	100142864	100142865	UHRF1BP1L	128	-	627	130	757	0	184	44	2	46	0	8	9	>UHRF1BP1L(-)_CTGGAGCCGCCCCGCCCCCG	>UHRF1BP1L(-)_CTGGAGCCGCCCCGCCCCCGCCCTCCACCGAGTCTCTTAGGTGATGCT	>UHRF1BP1L(-)_GCCCTCCACCGAGTCTCTTAGGTGATGCT
chr3	186567296	186567297	TBCCD1	138	-	591	132	723	12	164	34	12	46	5	3	9	>TBCCD1(-)_GCCCAGCGAGCGGACGCCGG	>TBCCD1(-)_GCCCAGCGAGCGGACGCCGGGCGCGGCGGCGCGCGGAGAAGTGCGGCG	>TBCCD1(-)_GGCGCGGCGGCGCGCGGAGAAGTGCGGCG
chr11	65858175	65858176	CFL1	311	-	402	317	719	275	120	32	14	46	38	57	22	>CFL1(-)_CTCCTACTAAACGGAAGGGG	>CFL1(-)_CTCCTACTAAACGGAAGGGGCCGGGAGAGGCCGCGTTCAGTCGGGTCC	>CFL1(-)_GCCGGGAGAGGCCGCGTTCAGTCGGGTCC
chr6	26124171	26124172	HIST1H2AC	4497	+	226	433	659	411	133	29	17	46	24	80	5	>HIST1H2AC(+)_AACTACCTATAAAAGCGGCC	>HIST1H2AC(+)_AACTACCTATAAAAGCGGCCATGTTTTACATATTTCTTGATTTTGTTT	>HIST1H2AC(+)_CATGTTTTACATATTTCTTGATTTTGTTT
chr2	37671641	37671642	CDC42EP3	448	-	381	274	655	134	141	36	10	46	35	19	13	>CDC42EP3(-)_CCGCAGGTTCAGTCCTCGCG	>CDC42EP3(-)_CCGCAGGTTCAGTCCTCGCGTCCGGCCGCCCCGCGCTCAGTCGCGCGC	>CDC42EP3(-)_GTCCGGCCGCCCCGCGCTCAGTCGCGCGC
chr4	139015780	139015781	NOCT	582	+	409	238	647	68	156	38	8	46	15	43	29	>NOCT(+)_TCGCCGGGCGCCCTGCAGGT	>NOCT(+)_TCGCCGGGCGCCCTGCAGGTCTCGCCAGGTCTCACAGCAGACGGTGCC	>NOCT(+)_TCTCGCCAGGTCTCACAGCAGACGGTGCC
chr5	54517758	54517759	SNX18	209	+	520	115	635	11	253	39	7	46	33	4	9	>SNX18(+)_GCCCCCGACCGGCGGCGGCT	>SNX18(+)_GCCCCCGACCGGCGGCGGCTGCGGCGGCCCAGCGCGGCAGTCGGCGCT	>SNX18(+)_TGCGGCGGCCCAGCGCGGCAGTCGGCGCT
chr2	24123715	24123716	PFN4	43	-	579	26	605	1	252	46	0	46	2	7	8	>PFN4(-)_GGGCCGGGGGCCTCCCGCGC	>PFN4(-)_GGGCCGGGGGCCTCCCGCGCAGGCGCGTCGTGCGCGGGGACCGCCCGG	>PFN4(-)_CAGGCGCGTCGTGCGCGGGGACCGCCCGG
chr1	11012653	11012654	TARDBP	120	+	433	151	584	22	218	39	7	46	9	40	33	>TARDBP(+)_GACGCCGGTGGGCGGGGGGA	>TARDBP(+)_GACGCCGGTGGGCGGGGGGAGGAGGCGGCCCTAGCGCCATTTTGTGGG	>TARDBP(+)_AGGAGGCGGCCCTAGCGCCATTTTGTGGG
chr7	6590020	6590021	C7orf26	655	+	483	82	565	10	247	42	4	46	10	8	1	>C7orf26(+)_GCGCTTGGCCCCTGCGGGCC	>C7orf26(+)_GCGCTTGGCCCCTGCGGGCCGCCGTCTCCGTGCCCGGCATTCGGCCGC	>C7orf26(+)_CGCCGTCTCCGTGCCCGGCATTCGGCCGC
chr8	48008430	48008431	UBE2V2	226	+	431	127	558	22	289	39	7	46	7	3	5	>UBE2V2(+)_CGGAAGTGACGCGCGACGGT	>UBE2V2(+)_CGGAAGTGACGCGCGACGGTTCGTGCGTGCGTGCGGGCGGCTGCGTCG	>UBE2V2(+)_TTCGTGCGTGCGTGCGGGCGGCTGCGTCG
chr20	23637976	23637977	CST3	180	-	452	94	546	32	196	42	4	46	5	23	9	>CST3(-)_TGGGGTGGGGCGGCGAAGGC	>CST3(-)_TGGGGTGGGGCGGCGAAGGCCGGAAGGGATAAAACCGCAGTCGCCGGC	>CST3(-)_CCGGAAGGGATAAAACCGCAGTCGCCGGC
chr3	12841536	12841537	RPL32	146	-	305	233	538	158	205	41	5	46	36	21	12	>RPL32(-)_ACGACCCATCAGCCCTTGCG	>RPL32(-)_ACGACCCATCAGCCCTTGCGCGCCACCGTCCCTTCTCTCTTCCTCGGC	>RPL32(-)_GCGCCACCGTCCCTTCTCTCTTCCTCGGC
chr22	20495788	20495789	KLHL22	107	-	439	95	534	3	156	40	6	46	7	14	7	>KLHL22(-)_CGCCTCCCGCCTCCCGCCTC	>KLHL22(-)_CGCCTCCCGCCTCCCGCCTCCCGCCTCCCTCCAGCTGCGAGTGCGGCC	>KLHL22(-)_CCCGCCTCCCTCCAGCTGCGAGTGCGGCC
chr8	144792389	144792390	RPL8	106	-	336	173	509	213	191	40	6	46	40	119	54	>RPL8(-)_GCCCCGGAAGATAAGGCCGC	>RPL8(-)_GCCCCGGAAGATAAGGCCGCTCGCTGACGCCGTGTTTCCTCTTTCGGC	>RPL8(-)_CTCGCTGACGCCGTGTTTCCTCTTTCGGC
chr13	96053389	96053390	UGGT2	131	-	367	129	496	7	232	40	6	46	8	6	2	>UGGT2(-)_CTCGAGCTCCTCCCACCGGA	>UGGT2(-)_CTCGAGCTCCTCCCACCGGAAGTGGGCAGCCGCGCAGCGGGAAGAGCC	>UGGT2(-)_AAGTGGGCAGCCGCGCAGCGGGAAGAGCC
chr16	69132569	69132570	CHTF8	271	-	388	77	465	30	152	41	5	46	16	23	5	>CHTF8(-)_CGGAAGTGCTCCTGGCGCAT	>CHTF8(-)_CGGAAGTGCTCCTGGCGCATAGTCGGAAGTGCGCAGGCAGTGCTCGCG	>CHTF8(-)_TAGTCGGAAGTGCGCAGGCAGTGCTCGCG
chr16	69132569	69132570	DERPC	271	-	388	77	465	30	152	41	5	46	16	23	5	>DERPC(-)_CGGAAGTGCTCCTGGCGCAT	>DERPC(-)_CGGAAGTGCTCCTGGCGCATAGTCGGAAGTGCGCAGGCAGTGCTCGCG	>DERPC(-)_TAGTCGGAAGTGCGCAGGCAGTGCTCGCG
chr6	33789134	33789135	LEMD2	45	-	297	84	381	24	184	39	7	46	9	23	18	>LEMD2(-)_GGGAGCAGTTCCGGGTGCGG	>LEMD2(-)_GGGAGCAGTTCCGGGTGCGGTGCGCGCCAGGGGCGGGCGGGGGGCGGC	>LEMD2(-)_GTGCGCGCCAGGGGCGGGCGGGGGGCGGC
chr21	33588629	33588630	DONSON	26	-	253	121	374	20	109	43	3	46	3	8	5	>DONSON(-)_GCCGGCTACCCTCAGCCGCC	>DONSON(-)_GCCGGCTACCCTCAGCCGCCGCGCGTCATGGCCCTTTCGGTGCCCGGC	>DONSON(-)_CGCGCGTCATGGCCCTTTCGGTGCCCGGC
chr11	777484	777485	GATD1	193	-	304	64	368	22	257	45	1	46	18	10	12	>GATD1(-)_CGCGAACTCCCGGGCGCGCC	>GATD1(-)_CGCGAACTCCCGGGCGCGCCCAGACGCCGCGCACGCGCAGACCCAGCG	>GATD1(-)_CCAGACGCCGCGCACGCGCAGACCCAGCG
chr13	114234896	114234897	CDC16	84	+	218	31	249	2	123	42	4	46	3	2	6	>CDC16(+)_TCCGGGGCGGGGCCTGCCTG	>CDC16(+)_TCCGGGGCGGGGCCTGCCTGGAGCGGAAGAGCCTGGGCAGTGCACGGG	>CDC16(+)_GGAGCGGAAGAGCCTGGGCAGTGCACGGG
chr19	10835974	10835975	C19orf38	44	+	126	15	141	7	128	39	7	46	3	3	3	>C19orf38(+)_CGCCTCGCCTCGACCGCTTG	>C19orf38(+)_CGCCTCGCCTCGACCGCTTGGCCACGCCCCCTCTCCCTGACTCTGCTG	>C19orf38(+)_GGCCACGCCCCCTCTCCCTGACTCTGCTG
chr6	42050533	42050534	TAF8	139	+	1012	105	1117	8	220	43	2	45	12	14	11	>TAF8(+)_CAAGTCCCATCGCGCCCCGC	>TAF8(+)_CAAGTCCCATCGCGCCCCGCGCTCGCGCACACTACGCCAGAACAAGAT	>TAF8(+)_CGCTCGCGCACACTACGCCAGAACAAGAT
chr1	181088699	181088700	IER5	2176	+	317	653	970	733	67	28	17	45	74	69	9	>IER5(+)_AGAAGCCTATATAAGGCGCG	>IER5(+)_AGAAGCCTATATAAGGCGCGGGGCAGCCAGGCTGCCCTGTTTAGCGAC	>IER5(+)_GGGGCAGCCAGGCTGCCCTGTTTAGCGAC
chr14	68793060	68793061	ZFP36L1	848	-	256	713	969	919	93	24	21	45	175	151	40	>ZFP36L1(-)_CTTTATAAATTGGGCTTTGC	>ZFP36L1(-)_CTTTATAAATTGGGCTTTGCGCGCCCCAGCCCGGAGTCAGAAAGGCGA	>ZFP36L1(-)_CGCGCCCCAGCCCGGAGTCAGAAAGGCGA
chr2	112645940	112645941	SLC20A1	542	+	449	448	897	801	127	33	12	45	84	417	96	>SLC20A1(+)_GCGGGCTATAAGTAGGGGCC	>SLC20A1(+)_GCGGGCTATAAGTAGGGGCCGGCGGGGTGCTCCGCTGGAGTGATGGCT	>SLC20A1(+)_CGGCGGGGTGCTCCGCTGGAGTGATGGCT
chr11	73376397	73376398	RELT	537	+	671	214	885	39	154	39	6	45	9	11	5	>RELT(+)_GGGTCTGCGCACCTTCCCGG	>RELT(+)_GGGTCTGCGCACCTTCCCGGCCCAGCCGGCGATTCATTCAAAAGGCGC	>RELT(+)_GCCCAGCCGGCGATTCATTCAAAAGGCGC
chr6	27824091	27824092	HIST1H4J	904	+	270	585	855	82	93	26	19	45	4	19	4	>HIST1H4J(+)_ACTGTCGTATAAAGGCGCTG	>HIST1H4J(+)_ACTGTCGTATAAAGGCGCTGCCTCAGGCCAGAGGCCTCACAAAGCGTT	>HIST1H4J(+)_GCCTCAGGCCAGAGGCCTCACAAAGCGTT
chrX	154371216	154371217	FLNA	1667	-	210	638	848	151	60	14	31	45	30	9	4	>FLNA(-)_GCGCCTCAAAATGAGTAGCT	>FLNA(-)_GCGCCTCAAAATGAGTAGCTCCCACTCTCGGGCGGGCCAGAGCGCAGC	>FLNA(-)_TCCCACTCTCGGGCGGGCCAGAGCGCAGC
chr12	6766362	6766363	PTMS	2499	+	231	521	752	399	49	25	20	45	37	68	13	>PTMS(+)_GCGCCGCCTTATAAGCGGGT	>PTMS(+)_GCGCCGCCTTATAAGCGGGTTCCCTTCCCGGGGGCGGCAGCGGCTGGT	>PTMS(+)_TTCCCTTCCCGGGGGCGGCAGCGGCTGGT
chr17	16215528	16215529	NCOR1	128	-	498	160	658	5	232	38	7	45	4	5	20	>NCOR1(-)_CGGCTCCGCGGGCTGGGGGG	>NCOR1(-)_CGGCTCCGCGGGCTGGGGGGAGGGAGAGGGGTTGAGTCAAGATGGCGG	>NCOR1(-)_GAGGGAGAGGGGTTGAGTCAAGATGGCGG
chr11	65720797	65720798	RNASEH2C	656	-	460	178	638	122	250	38	7	45	18	79	45	>RNASEH2C(-)_CTTCCTGAGAGGTCCTGCGC	>RNASEH2C(-)_CTTCCTGAGAGGTCCTGCGCGCTTTCCGCGCCAGCTTCAGTGTCAGCT	>RNASEH2C(-)_CGCTTTCCGCGCCAGCTTCAGTGTCAGCT
chr1	149886917	149886918	HIST2H2AC	1938	+	328	286	614	647	119	35	10	45	55	168	17	>HIST2H2AC(+)_AGGAAAGCTTATAAAGGCTT	>HIST2H2AC(+)_AGGAAAGCTTATAAAGGCTTTCCTCTTGGTTCTCTTTCAATCTTATTT	>HIST2H2AC(+)_TTCCTCTTGGTTCTCTTTCAATCTTATTT
chr2	74529697	74529698	AUP1	381	-	465	116	581	31	211	38	7	45	11	7	16	>AUP1(-)_CCTCACCCCGGGCGGATGCC	>AUP1(-)_CCTCACCCCGGGCGGATGCCCAAAGACTCCGCCTTCCCAAGAGCCCCT	>AUP1(-)_CCAAAGACTCCGCCTTCCCAAGAGCCCCT
chr6	20401908	20401909	E2F3	41	+	407	170	577	113	130	36	9	45	12	59	15	>E2F3(+)_ATCCCTTCATTCATTGTCAG	>E2F3(+)_ATCCCTTCATTCATTGTCAGCAGCAGCTTCCTGGAGCCATTTTTCAGC	>E2F3(+)_GCAGCAGCTTCCTGGAGCCATTTTTCAGC
chr6	127266863	127266864	RNF146	323	+	420	139	559	21	198	36	9	45	17	4	7	>RNF146(+)_CGCCGGGTGGTCACGTGACG	>RNF146(+)_CGCCGGGTGGTCACGTGACGGCCGCGCGCGTTCCCGGCAGCTGCGGGC	>RNF146(+)_GGCCGCGCGCGTTCCCGGCAGCTGCGGGC
chr6	26056469	26056470	HIST1H1C	821	-	217	290	507	437	144	30	15	45	43	111	24	>HIST1H1C(-)_GCTCTATATATACAGCGGCC	>HIST1H1C(-)_GCTCTATATATACAGCGGCCCTGCCCAGGCGCTGCTTCATCGGCGCTT	>HIST1H1C(-)_CCTGCCCAGGCGCTGCTTCATCGGCGCTT
chr1	156591780	156591781	NAXE	37	+	436	49	485	0	202	43	2	45	0	0	2	>NAXE(+)_GGGCGAGCGCCGCACATGCG	>NAXE(+)_GGGCGAGCGCCGCACATGCGCCGGGGCCGGGCCGGGCCGGGGGCGCGC	>NAXE(+)_GCCGGGGCCGGGCCGGGCCGGGGGCGCGC
chr16	2752679	2752680	SRRM2	91	+	363	84	447	14	176	41	4	45	11	22	25	>SRRM2(+)_TGACGTGCAGCGCGGCCCAG	>SRRM2(+)_TGACGTGCAGCGCGGCCCAGGCGGGGTGCGAGTGGCGCAGTTGGAGCC	>SRRM2(+)_GGCGGGGTGCGAGTGGCGCAGTTGGAGCC
chr10	130136417	130136418	GLRX3	36	+	316	117	433	12	213	41	4	45	7	7	12	>GLRX3(+)_CGGCCGCCGGCACTGGATTG	>GLRX3(+)_CGGCCGCCGGCACTGGATTGCTTCTGTCTGGCGGCGGCAGCATGGCGG	>GLRX3(+)_GCTTCTGTCTGGCGGCGGCAGCATGGCGG
chr20	2470786	2470787	SNRPB	143	-	278	134	412	47	184	37	8	45	21	7	5	>SNRPB(-)_AGTAGGTTTCTACCCGACCG	>SNRPB(-)_AGTAGGTTTCTACCCGACCGCATTTTACGTGGTGCTGCATTTCCGGTA	>SNRPB(-)_GCATTTTACGTGGTGCTGCATTTCCGGTA
chr6	44257511	44257512	SLC35B2	113	-	308	100	408	12	92	43	2	45	5	5	11	>SLC35B2(-)_AGGGAGGCGGGAAGAGCGCG	>SLC35B2(-)_AGGGAGGCGGGAAGAGCGCGGCACTTCCGCTGGCCGCTGGCTCGCTGG	>SLC35B2(-)_GGCACTTCCGCTGGCCGCTGGCTCGCTGG
chr20	62183034	62183035	MTG2	37	+	294	91	385	9	192	42	3	45	4	6	5	>MTG2(+)_AAGGCCCCGGAAGTGGTCGG	>MTG2(+)_AAGGCCCCGGAAGTGGTCGGCCGCTTGCGACGCTCCGGAAGTGACGTG	>MTG2(+)_GCCGCTTGCGACGCTCCGGAAGTGACGTG
chr20	32819974	32819975	MAPRE1	29	+	290	40	330	2	264	42	3	45	2	13	5	>MAPRE1(+)_GCGGGCGGGCGGGCGGGGTC	>MAPRE1(+)_GCGGGCGGGCGGGCGGGGTCTGGCGGTTTGAACGAGACGAAGACGGAA	>MAPRE1(+)_CTGGCGGTTTGAACGAGACGAAGACGGAA
chr2	677388	677389	TMEM18	68	-	199	27	226	2	177	44	1	45	2	2	3	>TMEM18(-)_GAGAGAGGATTTGGCGCCCT	>TMEM18(-)_GAGAGAGGATTTGGCGCCCTCCTCTGTGGATTCTGGCCAGGCCGGGTT	>TMEM18(-)_TCCTCTGTGGATTCTGGCCAGGCCGGGTT
chr10	72273923	72273924	DDIT4	448	+	283	679	962	748	117	20	24	44	105	96	28	>DDIT4(+)_GCTAGTCCTTATAGGCTGCT	>DDIT4(+)_GCTAGTCCTTATAGGCTGCTCCGCGCTGGTGCTAGGGCGCAGCAGGCC	>DDIT4(+)_TCCGCGCTGGTGCTAGGGCGCAGCAGGCC
chr11	66616629	66616630	RBM14	383	+	567	297	864	21	175	37	7	44	38	26	47	>RBM14(+)_CCAGGGCGCCTGCGCGGCGG	>RBM14(+)_CCAGGGCGCCTGCGCGGCGGGGTTCTCGGTCGCCAGCCATTCCTGAGG	>RBM14(+)_GGGTTCTCGGTCGCCAGCCATTCCTGAGG
chr11	66616629	66616630	RBM14-RBM4	383	+	567	297	864	21	175	37	7	44	38	26	47	>RBM14-RBM4(+)_CCAGGGCGCCTGCGCGGCGG	>RBM14-RBM4(+)_CCAGGGCGCCTGCGCGGCGGGGTTCTCGGTCGCCAGCCATTCCTGAGG	>RBM14-RBM4(+)_GGGTTCTCGGTCGCCAGCCATTCCTGAGG
chr22	42519788	42519789	RRP7A	41	-	618	211	829	7	242	38	6	44	9	2	3	>RRP7A(-)_AACCGCAACTCCCGGCGGCC	>RRP7A(-)_AACCGCAACTCCCGGCGGCCCCCGCGCTCCCGGGTGGCAAGATGGTGG	>RRP7A(-)_CCCCGCGCTCCCGGGTGGCAAGATGGTGG
chr7	6577461	6577462	ZDHHC4	136	+	707	117	824	22	175	41	3	44	11	5	9	>ZDHHC4(+)_GCGCCGTGCTGATGTCACGA	>ZDHHC4(+)_GCGCCGTGCTGATGTCACGAGCCCGCAGGAAGTCTCGTATCGCGCCCG	>ZDHHC4(+)_AGCCCGCAGGAAGTCTCGTATCGCGCCCG
chr15	89334814	89334815	POLG	278	-	517	265	782	95	207	38	6	44	19	20	14	>POLG(-)_TCTCGGGTAGCCGCGGGACC	>POLG(-)_TCTCGGGTAGCCGCGGGACCTAGCTGGGTGCAGACGGGAAGTTGCGGC	>POLG(-)_CTAGCTGGGTGCAGACGGGAAGTTGCGGC
chr14	103715420	103715421	XRCC3	18	-	565	84	649	19	155	41	3	44	2	21	16	>XRCC3(-)_AGGACGGCGGGAAGAGGAGT	>XRCC3(-)_AGGACGGCGGGAAGAGGAGTGCGGAACCCGCGGGAGGTGAGGCCCGCC	>XRCC3(-)_TGCGGAACCCGCGGGAGGTGAGGCCCGCC
chr19	3557583	3557584	MFSD12	89	-	315	314	629	69	131	35	9	44	44	46	39	>MFSD12(-)_CCCGGCGCAGTCGCCCGGCT	>MFSD12(-)_CCCGGCGCAGTCGCCCGGCTCTGGGGCCCGGCGGCTGCAGAGTCGAGC	>MFSD12(-)_TCTGGGGCCCGGCGGCTGCAGAGTCGAGC
chr11	67469230	67469231	TMEM134	169	-	461	121	582	2	200	40	4	44	6	10	16	>TMEM134(-)_CGGGGGCGGGGCAGCGGCGA	>TMEM134(-)_CGGGGGCGGGGCAGCGGCGACGCTGGGTGTGTGGGCGCAGATGGCGGC	>TMEM134(-)_ACGCTGGGTGTGTGGGCGCAGATGGCGGC
chr19	15107404	15107405	SYDE1	163	+	466	74	540	28	108	42	2	44	8	2	7	>SYDE1(+)_GAGGGCGCGGGGCGGCGCGG	>SYDE1(+)_GAGGGCGCGGGGCGGCGCGGCCGGAGCCCGGGGCGCGCACTCGGCTCG	>SYDE1(+)_GCCGGAGCCCGGGGCGCGCACTCGGCTCG
chr12	107761134	107761135	PRDM4	165	-	417	117	534	42	164	40	4	44	11	13	4	>PRDM4(-)_GGGCGCTGAGAGTGGCTGAG	>PRDM4(-)_GGGCGCTGAGAGTGGCTGAGGATCCGGAAACGCGCCGCAGAGGGTGCG	>PRDM4(-)_GGATCCGGAAACGCGCCGCAGAGGGTGCG
chr11	3840958	3840959	RHOG	106	-	321	182	503	12	219	31	13	44	7	33	38	>RHOG(-)_CGGCCCGCCCCCCCCACTTC	>RHOG(-)_CGGCCCGCCCCCCCCACTTCCTCCGGCCTCCCGCTCTCACTTCCTTCT	>RHOG(-)_CCTCCGGCCTCCCGCTCTCACTTCCTTCT
chr2	9474566	9474567	IAH1	17	+	388	69	457	0	236	41	3	44	0	5	2	>IAH1(+)_GTGGCTGGCGGCCCCGCCCC	>IAH1(+)_GTGGCTGGCGGCCCCGCCCCGCCCCGCCCGGCTGCTCCATGGCGCTGT	>IAH1(+)_CGCCCCGCCCGGCTGCTCCATGGCGCTGT
chr14	77800111	77800112	ADCK1	97	+	411	40	451	40	230	43	1	44	4	15	12	>ADCK1(+)_AGCGCAGTCAGGTGGCTGTC	>ADCK1(+)_AGCGCAGTCAGGTGGCTGTCCCCGCACGGTTCCCAGCTAATTCCCCGC	>ADCK1(+)_CCCCGCACGGTTCCCAGCTAATTCCCCGC
chr2	53971094	53971095	ACYP2	64	+	345	89	434	14	172	36	8	44	6	0	4	>ACYP2(+)_CCTCAAGTCACTTCCGGGGC	>ACYP2(+)_CCTCAAGTCACTTCCGGGGCGGGGCGGGGCGGAGCGACGGCGTCGGGG	>ACYP2(+)_CGGGGCGGGGCGGAGCGACGGCGTCGGGG
chr5	180802803	180802804	MGAT1	430	-	294	102	396	51	121	42	2	44	18	5	8	>MGAT1(-)_CACGTTGCCCGCCCGGCCGT	>MGAT1(-)_CACGTTGCCCGCCCGGCCGTCCGGCCCCGGCGCGCCGCAGAAAGGGCT	>MGAT1(-)_TCCGGCCCCGGCGCGCCGCAGAAAGGGCT
chr3	196942675	196942676	NCBP2AS2	77	+	293	94	387	38	206	42	2	44	4	4	4	>NCBP2AS2(+)_GGGGGCATAGACGTCCGGGT	>NCBP2AS2(+)_GGGGGCATAGACGTCCGGGTCGGGCGCCGCGGGGCGGAAGACGAGGGC	>NCBP2AS2(+)_TCGGGCGCCGCGGGGCGGAAGACGAGGGC
chr11	66638705	66638706	RBM4	425	+	233	146	379	21	156	38	6	44	9	11	12	>RBM4(+)_GAGCACTGCTGCGGCCGCCG	>RBM4(+)_GAGCACTGCTGCGGCCGCCGCCATTTTAGCGTTTTGTCAGAAGCGTCC	>RBM4(+)_GCCATTTTAGCGTTTTGTCAGAAGCGTCC
chr11	117144290	117144291	PAFAH1B2	45	+	249	116	365	105	237	36	8	44	34	39	29	>PAFAH1B2(+)_AGCCATTTGGCTGAGTGGCA	>PAFAH1B2(+)_AGCCATTTGGCTGAGTGGCAGGGGAACCGGAAGTGGAGGAGCTGCTGC	>PAFAH1B2(+)_AGGGGAACCGGAAGTGGAGGAGCTGCTGC
chr19	40348382	40348383	C19orf47	58	-	275	60	335	9	176	44	0	44	13	4	7	>C19orf47(-)_CGGGGCGGGCAGCCCGGGCC	>C19orf47(-)_CGGGGCGGGCAGCCCGGGCCGGGGGAGGAGTGTCTGACAGTTGGCGCC	>C19orf47(-)_CGGGGGAGGAGTGTCTGACAGTTGGCGCC
chr6	31827736	31827737	HSPA1B	2232	+	655	746	1401	583	140	24	19	43	57	90	16	>HSPA1B(+)_CACGACGACTTATAAAAGCC	>HSPA1B(+)_CACGACGACTTATAAAAGCCGAGGGGCGCGCGGTCCGGAAAACGGCCA	>HSPA1B(+)_CGAGGGGCGCGCGGTCCGGAAAACGGCCA
chr6	32972200	32972201	BRD2	755	+	451	698	1149	1384	110	19	24	43	97	222	43	>BRD2(+)_CCTATATATAAAGGGCTGGC	>BRD2(+)_CCTATATATAAAGGGCTGGCGCGGGGCTCGGCGGCGCCATTTCGTGCT	>BRD2(+)_CGCGGGGCTCGGCGGCGCCATTTCGTGCT
chr15	64841914	64841915	PLEKHO2	3519	+	634	428	1062	71	136	34	9	43	15	57	22	>PLEKHO2(+)_CCCCCGAAGTTTCTTGGGCC	>PLEKHO2(+)_CCCCCGAAGTTTCTTGGGCCCCCGGCAGCCGGCGGGACAGAACGCGGA	>PLEKHO2(+)_CCCCGGCAGCCGGCGGGACAGAACGCGGA
chr16	9091647	9091648	C16orf72	1363	+	444	486	930	117	112	34	9	43	48	37	17	>C16orf72(+)_AGCCGTCCTCGGCGGTGGCG	>C16orf72(+)_AGCCGTCCTCGGCGGTGGCGACGACGACGACGTTGCTCAGTCTTGGGG	>C16orf72(+)_GACGACGACGACGTTGCTCAGTCTTGGGG
chr3	52198159	52198160	ALAS1	369	+	580	263	843	18	155	40	3	43	1	36	5	>ALAS1(+)_CTCCCGCTGTATATTAAGGC	>ALAS1(+)_CTCCCGCTGTATATTAAGGCGCCGGCGATCGCGGCCTGAGGCTGCTCC	>ALAS1(+)_CGCCGGCGATCGCGGCCTGAGGCTGCTCC
chr4	55395962	55395963	TMEM165	449	+	516	325	841	38	162	36	7	43	12	52	35	>TMEM165(+)_GTCGGGGCTGGGCCGCGCCG	>TMEM165(+)_GTCGGGGCTGGGCCGCGCCGAGGCAGCTGGCTGACTCCAGTTTAGCCG	>TMEM165(+)_GAGGCAGCTGGCTGACTCCAGTTTAGCCG
chr8	17246985	17246986	VPS37A	70	+	666	160	826	36	189	42	1	43	9	20	3	>VPS37A(+)_GTGGTGGAGCGCTGGGCGGC	>VPS37A(+)_GTGGTGGAGCGCTGGGCGGCCAGGCTCCCTGGCTGGCCGGTTTGGGCG	>VPS37A(+)_CCAGGCTCCCTGGCTGGCCGGTTTGGGCG
chr16	88785219	88785220	PIEZO1	772	-	466	340	806	360	150	33	10	43	27	84	11	>PIEZO1(-)_GGGGCCGAGCTTATAAAGGC	>PIEZO1(-)_GGGGCCGAGCTTATAAAGGCCCGCGGGCGGAGGAGGGCGGGAGCCGCC	>PIEZO1(-)_CCCGCGGGCGGAGGAGGGCGGGAGCCGCC
chr22	24270875	24270876	SPECC1L	65	+	638	78	716	19	196	41	2	43	4	2	6	>SPECC1L(+)_AGGGAGGCCGGGCGGCCCGG	>SPECC1L(+)_AGGGAGGCCGGGCGGCCCGGCAAGCGGCGCTGCGGGGTAGGCTGCTTT	>SPECC1L(+)_GCAAGCGGCGCTGCGGGGTAGGCTGCTTT
chr22	24270875	24270876	SPECC1L-ADORA2A	65	+	638	78	716	19	196	41	2	43	4	2	6	>SPECC1L-ADORA2A(+)_AGGGAGGCCGGGCGGCCCGG	>SPECC1L-ADORA2A(+)_AGGGAGGCCGGGCGGCCCGGCAAGCGGCGCTGCGGGGTAGGCTGCTTT	>SPECC1L-ADORA2A(+)_GCAAGCGGCGCTGCGGGGTAGGCTGCTTT
chr8	131904096	131904097	EFR3A	127	+	592	90	682	2	205	41	2	43	2	4	3	>EFR3A(+)_CGGCGGCGGCGCGCTGACGT	>EFR3A(+)_CGGCGGCGGCGCGCTGACGTAACGGGCGTGGGTCGTCCGTCGCGCCGC	>EFR3A(+)_TAACGGGCGTGGGTCGTCCGTCGCGCCGC
chr15	51829652	51829653	TMOD3	50	+	573	108	681	6	216	38	5	43	8	2	3	>TMOD3(+)_TGCCCCGCGGCACGGGAGTG	>TMOD3(+)_TGCCCCGCGGCACGGGAGTGCGCACGCGCGTCGGAGGCGAAGGAGGAA	>TMOD3(+)_GCGCACGCGCGTCGGAGGCGAAGGAGGAA
chr11	62653301	62653302	INTS5	569	-	564	107	671	21	270	38	5	43	3	13	13	>INTS5(-)_CTGGTAGCTGGTTCCTTTCG	>INTS5(-)_CTGGTAGCTGGTTCCTTTCGCGTTTCCTGTCAGCGCGCATGCGCCGCC	>INTS5(-)_GCGTTTCCTGTCAGCGCGCATGCGCCGCC
chr5	34008049	34008050	AMACR	690	-	422	241	663	25	184	37	6	43	13	13	4	>AMACR(-)_CTTCTTGCAGGCTGCTGGGC	>AMACR(-)_CTTCTTGCAGGCTGCTGGGCTGGGGCTAAGGGCTGCTCAGTTTCCTTC	>AMACR(-)_CTGGGGCTAAGGGCTGCTCAGTTTCCTTC
chr9	34637753	34637754	SIGMAR1	123	-	418	216	634	35	150	35	8	43	7	33	21	>SIGMAR1(-)_GCTTCGTGGGCAGCCGGCGG	>SIGMAR1(-)_GCTTCGTGGGCAGCCGGCGGGCTCCGAGGCCGTGAGCGCAAAGCCTCA	>SIGMAR1(-)_GGCTCCGAGGCCGTGAGCGCAAAGCCTCA
chr8	94719899	94719900	DPY19L4	181	+	529	51	580	13	158	39	4	43	4	3	3	>DPY19L4(+)_CGGAGGGGGGTGGGTCAGGA	>DPY19L4(+)_CGGAGGGGGGTGGGTCAGGAAGTGGGGGCGCGGCGGCCAGGAGCGGGC	>DPY19L4(+)_AAGTGGGGGCGCGGCGGCCAGGAGCGGGC
chr20	6006122	6006123	CRLS1	508	+	370	185	555	178	158	34	9	43	19	84	21	>CRLS1(+)_CCACCTGTATAAGTGGAGTG	>CRLS1(+)_CCACCTGTATAAGTGGAGTGTGCTGGGGTGTGTAAAGTAGTATGGAGG	>CRLS1(+)_GTGCTGGGGTGTGTAAAGTAGTATGGAGG
chr2	148644753	148644754	EPC2	756	+	410	122	532	37	162	36	7	43	17	46	30	>EPC2(+)_TCGCGCGGGCTGCCGGGATC	>EPC2(+)_TCGCGCGGGCTGCCGGGATCGCTCGCCGCCGCTGTGGTAATGTCCGCC	>EPC2(+)_CGCTCGCCGCCGCTGTGGTAATGTCCGCC
chr3	3126944	3126945	TRNT1	52	+	422	76	498	7	222	40	3	43	3	3	5	>TRNT1(+)_CCCATGTGCGTTGGTGACGT	>TRNT1(+)_CCCATGTGCGTTGGTGACGTCACCGCGTTCACCAGCCCGGAAGTGCGC	>TRNT1(+)_TCACCGCGTTCACCAGCCCGGAAGTGCGC
chr11	1309622	1309623	TOLLIP	99	-	401	97	498	5	197	39	4	43	11	0	4	>TOLLIP(-)_CAGTGGGGCGGTGCCGGGGG	>TOLLIP(-)_CAGTGGGGCGGTGCCGGGGGCGGGGCGCGGCGGCTGTCAGCTGACTGT	>TOLLIP(-)_GCGGGGCGCGGCGGCTGTCAGCTGACTGT
chr9	137114712	137114713	DPP7	28	-	384	107	491	8	183	39	4	43	1	18	24	>DPP7(-)_TGACCCCGCCCACGTGACGG	>DPP7(-)_TGACCCCGCCCACGTGACGGGCGCCCGCGGAAGGCGACATGGGCTCCG	>DPP7(-)_GGCGCCCGCGGAAGGCGACATGGGCTCCG
chr3	179323069	179323070	ZNF639	95	+	401	90	491	3	133	31	12	43	3	7	2	>ZNF639(+)_AGGTGCGCGGCGCAGGCGCG	>ZNF639(+)_AGGTGCGCGGCGCAGGCGCGGAGCGTGGCGGCCAGGGCAGTGCGGCCG	>ZNF639(+)_GGAGCGTGGCGGCCAGGGCAGTGCGGCCG
chr8	144095075	144095076	CYC1	45	+	317	169	486	31	221	36	7	43	11	3	6	>CYC1(+)_GTTTTGACTCTCGTGGCGCC	>CYC1(+)_GTTTTGACTCTCGTGGCGCCCCAGGGGCCGACGGGAGTGGCGGCCGCG	>CYC1(+)_CCCAGGGGCCGACGGGAGTGGCGGCCGCG
chr4	1684298	1684299	FAM53A	12	-	377	88	465	41	123	37	6	43	11	5	8	>FAM53A(-)_GCGGCCGCGGTTTTGTTCCG	>FAM53A(-)_GCGGCCGCGGTTTTGTTCCGCCGCGGCTGAGGCGCGTCGCCCTGAGCG	>FAM53A(-)_GCCGCGGCTGAGGCGCGTCGCCCTGAGCG
chr1	110034623	110034624	STRIP1	66	+	301	145	446	4	245	35	8	43	5	14	12	>STRIP1(+)_TTGCATCACGGCGGCTGTGC	>STRIP1(+)_TTGCATCACGGCGGCTGTGCGCGAGTTAAGCTGGGGGTGTGGAGCAGC	>STRIP1(+)_CGCGAGTTAAGCTGGGGGTGTGGAGCAGC
chr10	15097376	15097377	RPP38	33	+	369	72	441	4	251	42	1	43	2	2	2	>RPP38(+)_GCGGCGCAGGCGCACTGGGC	>RPP38(+)_GCGGCGCAGGCGCACTGGGCGCCGGTGCTGTTGCCTTCAGGTGACCAC	>RPP38(+)_CGCCGGTGCTGTTGCCTTCAGGTGACCAC
chr11	62646613	62646614	GANAB	91	-	233	206	439	15	123	32	11	43	6	12	15	>GANAB(-)_AGCGCGCGCGATGGGGCGGG	>GANAB(-)_AGCGCGCGCGATGGGGCGGGAGGTTTGGGGTCAAGGAGCAAACTCTGC	>GANAB(-)_GAGGTTTGGGGTCAAGGAGCAAACTCTGC
chr3	196712410	196712411	PIGX	47	+	402	22	424	8	122	41	2	43	1	10	11	>PIGX(+)_AGGCAGCTGGGAACCGCGGG	>PIGX(+)_AGGCAGCTGGGAACCGCGGGCGCTAGGCGCGCGCACCCAGCACTCGGT	>PIGX(+)_GCGCTAGGCGCGCGCACCCAGCACTCGGT
chr2	15591883	15591884	DDX1	83	+	326	96	422	28	182	41	2	43	12	4	11	>DDX1(+)_GGGGCCGGAAGCGCGCGCCG	>DDX1(+)_GGGGCCGGAAGCGCGCGCCGCCACTGCCACGCCGTGTCAGTCGGGAGG	>DDX1(+)_GCCACTGCCACGCCGTGTCAGTCGGGAGG
chr16	46973670	46973671	DNAJA2	108	-	231	182	413	13	171	37	6	43	5	7	10	>DNAJA2(-)_GGGTCAAAGTTCAGCCCCGC	>DNAJA2(-)_GGGTCAAAGTTCAGCCCCGCCCCCGCTTCCCCCTCGCTGTCTCCCTCG	>DNAJA2(-)_CCCCCGCTTCCCCCTCGCTGTCTCCCTCG
chr11	108121566	108121567	ACAT1	403	+	268	134	402	50	169	36	7	43	6	10	7	>ACAT1(+)_CGGGCCGCTAGGGGTGCGGG	>ACAT1(+)_CGGGCCGCTAGGGGTGCGGGGTTGGGGAGGAGGCCGCTAGTCTACGCC	>ACAT1(+)_GGTTGGGGAGGAGGCCGCTAGTCTACGCC
chr13	20773917	20773918	EEF1AKMT1	127	-	256	120	376	18	160	35	8	43	15	5	7	>EEF1AKMT1(-)_ACACGGCGAGTCTGGGCGAC	>EEF1AKMT1(-)_ACACGGCGAGTCTGGGCGACTGCGCACGCGCGGCTGGTGAGTGGCGGG	>EEF1AKMT1(-)_CTGCGCACGCGCGGCTGGTGAGTGGCGGG
chr8	143597402	143597403	EEF1D	38	-	283	76	359	57	224	42	1	43	13	158	45	>EEF1D(-)_ATTTCCCGTGCGCGGCCCGG	>EEF1D(-)_ATTTCCCGTGCGCGGCCCGGGCGGCCCTCCCTTTCATCAGTCTTCCCG	>EEF1D(-)_GGCGGCCCTCCCTTTCATCAGTCTTCCCG
chr18	79988562	79988563	TXNL4A	408	-	248	105	353	11	173	37	6	43	7	2	5	>TXNL4A(-)_ATGCCGTCAGCACGCACGGC	>TXNL4A(-)_ATGCCGTCAGCACGCACGGCGTCGGTGCGTGCGCGCCCAGACGTTCTG	>TXNL4A(-)_CGTCGGTGCGTGCGCGCCCAGACGTTCTG
chr15	59657514	59657515	GTF2A2	39	-	185	94	279	31	180	35	8	43	11	7	8	>GTF2A2(-)_ACTTCCAGGTTCCGCGAGCA	>GTF2A2(-)_ACTTCCAGGTTCCGCGAGCACTTCCGGGTCGTCAGCTCAGTTCTGCGG	>GTF2A2(-)_ACTTCCGGGTCGTCAGCTCAGTTCTGCGG
chr1	58784042	58784043	JUN	944	-	273	796	1069	356	134	21	21	42	47	38	13	>JUN(-)_TAGCAGATAAGTGTTGAGCT	>JUN(-)_TAGCAGATAAGTGTTGAGCTCGGGCTGGATAAGGGCTCAGAGTTGCAC	>JUN(-)_TCGGGCTGGATAAGGGCTCAGAGTTGCAC
chr3	194685882	194685883	FAM43A	3674	+	347	705	1052	476	161	22	20	42	47	61	17	>FAM43A(+)_CCGGCCTATATTTACCCGAG	>FAM43A(+)_CCGGCCTATATTTACCCGAGATCTTCCTCCCGGACGGCAAGGATGTGA	>FAM43A(+)_GATCTTCCTCCCGGACGGCAAGGATGTGA
chr1	149861158	149861159	HIST2H4B	4683	-	191	775	966	218	85	18	24	42	15	16	7	>HIST2H4B(-)_ACTCTTGTATATCAGGGGAA	>HIST2H4B(-)_ACTCTTGTATATCAGGGGAAGACGGTGCTCGCCTTGACAGAAGCTGTC	>HIST2H4B(-)_AGACGGTGCTCGCCTTGACAGAAGCTGTC
chr2	43226604	43226605	ZFP36L2	268	-	308	590	898	662	111	21	21	42	75	52	14	>ZFP36L2(-)_CCCGGGCTCTATATAGGGCG	>ZFP36L2(-)_CCCGGGCTCTATATAGGGCGCGCGCTCGGAGGCCGCCGAGTTCCAGCA	>ZFP36L2(-)_GCGCGCTCGGAGGCCGCCGAGTTCCAGCA
chr9	89311197	89311198	CKS2	468	+	439	456	895	274	113	28	14	42	50	94	39	>CKS2(+)_GTCGGATTCAAATCCGGATC	>CKS2(+)_GTCGGATTCAAATCCGGATCGTTGGGACTGCGGTCGTTAGTCTCCGGC	>CKS2(+)_CGTTGGGACTGCGGTCGTTAGTCTCCGGC
chr15	34210034	34210035	KATNBL1	260	-	634	202	836	29	212	35	7	42	5	32	37	>KATNBL1(-)_GCGGCCGCGTTTGAATGGCC	>KATNBL1(-)_GCGGCCGCGTTTGAATGGCCCTGAGTGGGACTCGGCCCAGAAGCCGAG	>KATNBL1(-)_CCTGAGTGGGACTCGGCCCAGAAGCCGAG
chr6	26204609	26204610	HIST1H4E	4979	+	134	699	833	101	66	12	30	42	15	7	1	>HIST1H4E(+)_TTCCCGGCATATAAGAATAC	>HIST1H4E(+)_TTCCCGGCATATAAGAATACTACCGTCGCTTGTTTTTCAGATTTTTGC	>HIST1H4E(+)_CTACCGTCGCTTGTTTTTCAGATTTTTGC
chr3	50236203	50236204	GNAI2	1987	+	237	531	768	95	124	22	20	42	25	18	5	>GNAI2(+)_CGCCGTCGGTGCGCGGCGGT	>GNAI2(+)_CGCCGTCGGTGCGCGGCGGTAGGGAAGGCGCCTCCCGCAGTCGCTCGG	>GNAI2(+)_TAGGGAAGGCGCCTCCCGCAGTCGCTCGG
chr8	133297252	133297253	NDRG1	1166	-	187	570	757	550	152	21	21	42	54	82	15	>NDRG1(-)_CGCGGCGCCTATAAAGTCGC	>NDRG1(-)_CGCGGCGCCTATAAAGTCGCCCTCCGCCCGGACGTAAACAAACCTCGC	>NDRG1(-)_CCCTCCGCCCGGACGTAAACAAACCTCGC
chr12	54280747	54280748	HNRNPA1	155	+	481	231	712	211	153	34	8	42	40	75	22	>HNRNPA1(+)_GCGAAGGTAGGCTGGCAGAT	>HNRNPA1(+)_GCGAAGGTAGGCTGGCAGATACGTTCGTCAGCTTGCTCCTTTCTGCCC	>HNRNPA1(+)_TACGTTCGTCAGCTTGCTCCTTTCTGCCC
chr15	101724431	101724432	TARSL2	176	-	477	212	689	47	174	31	11	42	11	13	10	>TARSL2(-)_TTCTGCCGTGCGCTGAGTGT	>TARSL2(-)_TTCTGCCGTGCGCTGAGTGTCCGCGTCGCCCTCGCCGCAGTCGCGGGC	>TARSL2(-)_TCCGCGTCGCCCTCGCCGCAGTCGCGGGC
chr1	38991287	38991288	AKIRIN1	461	+	568	118	686	14	193	39	3	42	21	17	30	>AKIRIN1(+)_AGGCGGGGCCAGCGCCGCTG	>AKIRIN1(+)_AGGCGGGGCCAGCGCCGCTGCCGGGTGCTGGAGGCGCCATTGGAGCCG	>AKIRIN1(+)_GCCGGGTGCTGGAGGCGCCATTGGAGCCG
chr19	10194950	10194951	DNMT1	202	-	512	160	672	64	265	36	6	42	13	39	23	>DNMT1(-)_CGCCTCCGCTCATCGCCCCT	>DNMT1(-)_CGCCTCCGCTCATCGCCCCTCCCCATCGGTTTCCGCGCGAAAAGCCGG	>DNMT1(-)_TCCCCATCGGTTTCCGCGCGAAAAGCCGG
chr17	29390362	29390363	TAOK1	68	+	557	113	670	19	200	39	3	42	2	28	7	>TAOK1(+)_GGAGGAGGGGAGTGGTGTCG	>TAOK1(+)_GGAGGAGGGGAGTGGTGTCGGGTAAAGGGGGGGAAGCTGGGCAGCGGC	>TAOK1(+)_GGGTAAAGGGGGGGAAGCTGGGCAGCGGC
chr7	74289436	74289437	CLIP2	247	+	408	204	612	105	169	30	12	42	10	14	1	>CLIP2(+)_CGCCGGCCCCTTTTGTTCCC	>CLIP2(+)_CGCCGGCCCCTTTTGTTCCCTCCCGGAGCCGGGCCGCTGGCTCCGCTG	>CLIP2(+)_CTCCCGGAGCCGGGCCGCTGGCTCCGCTG
chr19	45792782	45792783	DMWD	56	-	546	61	607	15	140	40	2	42	3	14	1	>DMWD(-)_CTTCCGGGAGGGGGCCCGGC	>DMWD(-)_CTTCCGGGAGGGGGCCCGGCTGCGGGCGGCAGTCCGGCAGTGGCGGGG	>DMWD(-)_CTGCGGGCGGCAGTCCGGCAGTGGCGGGG
chr3	134374446	134374447	AMOTL2	1657	-	210	394	604	267	108	27	15	42	89	53	26	>AMOTL2(-)_GGCCGACCCTGGGGCTGCGC	>AMOTL2(-)_GGCCGACCCTGGGGCTGCGCGCTGGGGCGCGAACAGCCAGAGCGTCGG	>AMOTL2(-)_CGCTGGGGCGCGAACAGCCAGAGCGTCGG
chr22	28800565	28800566	XBP1	407	-	423	142	565	97	171	35	7	42	12	35	20	>XBP1(-)_CGACCGTAGAAAGGCCGGGC	>XBP1(-)_CGACCGTAGAAAGGCCGGGCGCGGCGAGGCTGGGCGCTGGGCGGCTGC	>XBP1(-)_CGCGGCGAGGCTGGGCGCTGGGCGGCTGC
chr19	12734662	12734663	TRIR	71	-	435	107	542	17	192	37	5	42	12	23	37	>TRIR(-)_GGAGCGGCCTTCCCGGAGTC	>TRIR(-)_GGAGCGGCCTTCCCGGAGTCCTTTGCGCGGCACCTGGCGACAAAATGG	>TRIR(-)_CCTTTGCGCGGCACCTGGCGACAAAATGG
chr17	75941041	75941042	FBF1	163	-	406	124	530	20	176	39	3	42	7	9	10	>FBF1(-)_TCCCAGGATGCCTCGCGCCC	>FBF1(-)_TCCCAGGATGCCTCGCGCCCGCCTTTCCGCGGGAGGCCAGACGGCTGA	>FBF1(-)_CGCCTTTCCGCGGGAGGCCAGACGGCTGA
chr6	107028219	107028220	C6orf203	102	+	433	73	506	1	195	38	4	42	2	3	2	>C6orf203(+)_CCGGCGGAAGGGGCGGGGCG	>C6orf203(+)_CCGGCGGAAGGGGCGGGGCGCAGATAGGGGTAGCCTGGAGGCCTGCAG	>C6orf203(+)_GCAGATAGGGGTAGCCTGGAGGCCTGCAG
chr9	128656657	128656658	WDR34	309	-	380	123	503	54	170	38	4	42	11	28	14	>WDR34(-)_AGCCAGGCGGGAAGCGCTGG	>WDR34(-)_AGCCAGGCGGGAAGCGCTGGTGTTGCGGCGCTGGCGACAGTCGGGGTT	>WDR34(-)_GTGTTGCGGCGCTGGCGACAGTCGGGGTT
chr1	165698561	165698562	ALDH9A1	114	-	358	109	467	58	240	38	4	42	14	55	28	>ALDH9A1(-)_CGCGGCCCGTCAGCCTCTGC	>ALDH9A1(-)_CGCGGCCCGTCAGCCTCTGCCGCGGAGCTGCGTCCGCCACTCATGTTT	>ALDH9A1(-)_CCGCGGAGCTGCGTCCGCCACTCATGTTT
chr1	229626246	229626247	URB2	53	+	372	88	460	6	222	39	3	42	2	11	4	>URB2(+)_CGCGGGTACCGGTCCCACGT	>URB2(+)_CGCGGGTACCGGTCCCACGTGGTGGGGACGCGGGACCCGTACAGCGGC	>URB2(+)_TGGTGGGGACGCGGGACCCGTACAGCGGC
chr1	19882401	19882402	OTUD3	361	+	324	75	399	23	215	36	6	42	9	6	10	>OTUD3(+)_CGGGGTGCTGGGCGCCGGCG	>OTUD3(+)_CGGGGTGCTGGGCGCCGGCGCAGGCGCGGTTGCTGCGTAGTCGTCGCC	>OTUD3(+)_GCAGGCGCGGTTGCTGCGTAGTCGTCGCC
chr19	18919377	18919378	COPE	75	-	315	47	362	7	270	42	0	42	14	6	9	>COPE(-)_AGCGTGCCCGTGTCTTGCTT	>COPE(-)_AGCGTGCCCGTGTCTTGCTTCCGGCTGACGTGTCTTTCAGGAAGAGGA	>COPE(-)_TCCGGCTGACGTGTCTTTCAGGAAGAGGA
chr17	44830247	44830248	GJC1	14	-	314	46	360	1	163	39	3	42	0	2	8	>GJC1(-)_CCTTCCCGCGGGTCGCGGCG	>GJC1(-)_CCTTCCCGCGGGTCGCGGCGGCGGGAGCGGGAGGCGGCGGCGGCGGCG	>GJC1(-)_GGCGGGAGCGGGAGGCGGCGGCGGCGGCG
chr3	75785545	75785546	ZNF717	50	-	186	93	279	6	214	32	10	42	6	3	5	>ZNF717(-)_CATTTTCCTCCGGAAGTGCG	>ZNF717(-)_CATTTTCCTCCGGAAGTGCGGCACCCAGAGGCGGTCTTGTAGCTGGGC	>ZNF717(-)_GGCACCCAGAGGCGGTCTTGTAGCTGGGC
chr19	13774472	13774473	C19orf53	33	+	199	79	278	17	159	37	5	42	3	2	1	>C19orf53(+)_TACGACTGCTCACAGTCCCG	>C19orf53(+)_TACGACTGCTCACAGTCCCGCCTCTTCCGCTGCGTGCCGGACCATGGC	>C19orf53(+)_GCCTCTTCCGCTGCGTGCCGGACCATGGC
chr6	42890818	42890819	C6orf226	191	-	206	53	259	10	132	38	4	42	6	4	5	>C6orf226(-)_GTTGCACCCATTCGGCCCGG	>C6orf226(-)_GTTGCACCCATTCGGCCCGGAAGTGCTCGCTTCTCTGCATTACACGCC	>C6orf226(-)_GAAGTGCTCGCTTCTCTGCATTACACGCC
chr16	1782537	1782538	SPSB3	186	-	203	34	237	13	211	39	3	42	3	16	7	>SPSB3(-)_GGATTGTTTACGTCTCGCTC	>SPSB3(-)_GGATTGTTTACGTCTCGCTCCGGGGCGGAAAGTGGGTCAGGGCCGGGC	>SPSB3(-)_CCGGGGCGGAAAGTGGGTCAGGGCCGGGC
chr16	67873090	67873091	EDC4	35	+	175	61	236	0	185	36	6	42	2	2	2	>EDC4(+)_GCCTCGGCTCGTGGGTGCCG	>EDC4(+)_GCCTCGGCTCGTGGGTGCCGGAAGTGGAGGCGGTTGGTGGGGTTGGCG	>EDC4(+)_GGAAGTGGAGGCGGTTGGTGGGGTTGGCG
chr1	114716761	114716762	NRAS	75	-	88	56	144	9	121	38	4	42	0	2	2	>NRAS(-)_CTGGGGCGCCGACTGATTAC	>NRAS(-)_CTGGGGCGCCGACTGATTACGTAGCGGGCGGGGCCGGAAGTGCCGCTC	>NRAS(-)_CGTAGCGGGCGGGGCCGGAAGTGCCGCTC
chr1	6602868	6602869	KLHL21	2912	-	435	465	900	611	139	19	22	41	54	129	28	>KLHL21(-)_CCCCGCCCTATTTATAGCAG	>KLHL21(-)_CCCCGCCCTATTTATAGCAGCGGTGCCTAGCGCGCCGCGTCTCTCCGC	>KLHL21(-)_GCGGTGCCTAGCGCGCCGCGTCTCTCCGC
chr17	27294113	27294114	WSB1	2092	+	482	384	866	217	147	34	7	41	36	51	16	>WSB1(+)_GCCCAGATATCTCCGGCGCC	>WSB1(+)_GCCCAGATATCTCCGGCGCCGCCCGCCATTTTGACTCCAGTGTCTCGT	>WSB1(+)_CGCCCGCCATTTTGACTCCAGTGTCTCGT
chr6	134174863	134174864	SGK1	1450	-	219	570	789	1000	133	18	23	41	113	73	22	>SGK1(-)_GGTGCCTTTTTTATAAGGCC	>SGK1(-)_GGTGCCTTTTTTATAAGGCCGAGCGCGCGGCCTGGCGCAGCATACGCC	>SGK1(-)_CGAGCGCGCGGCCTGGCGCAGCATACGCC
chr14	101964572	101964573	DYNC1H1	940	+	386	403	789	168	147	32	9	41	35	66	15	>DYNC1H1(+)_TGGCTGCCTTTAGGGCGGAG	>DYNC1H1(+)_TGGCTGCCTTTAGGGCGGAGCCGGCTCCCGCTCTCCTCAGTCTGCGGT	>DYNC1H1(+)_GCCGGCTCCCGCTCTCCTCAGTCTGCGGT
chr7	152759787	152759788	ACTR3B	169	+	550	179	729	39	180	35	6	41	7	4	0	>ACTR3B(+)_GCATCCGGGCTCCCGGCAGC	>ACTR3B(+)_GCATCCGGGCTCCCGGCAGCGGCGCTGCGGCGGCTCGCGGGAGACGCT	>ACTR3B(+)_CGGCGCTGCGGCGGCTCGCGGGAGACGCT
chr11	66345056	66345057	BRMS1	65	-	545	177	722	68	130	35	6	41	5	31	8	>BRMS1(-)_TGCCTCCCGAAGAAAAGGGA	>BRMS1(-)_TGCCTCCCGAAGAAAAGGGAGCCGCGCAGCGCCTACGGGAGTCCGGCG	>BRMS1(-)_AGCCGCGCAGCGCCTACGGGAGTCCGGCG
chr14	74302933	74302934	ABCD4	538	-	478	176	654	106	193	36	5	41	14	64	22	>ABCD4(-)_GACTCTACCCAGTACTGAAC	>ABCD4(-)_GACTCTACCCAGTACTGAACTAGGGGCAGCTGGGCTCCAGAGTCCCTC	>ABCD4(-)_CTAGGGGCAGCTGGGCTCCAGAGTCCCTC
chr12	56042142	56042143	RPS26	583	+	232	419	651	269	132	31	10	41	29	33	12	>RPS26(+)_CTCATGCTATATAGGAGGGC	>RPS26(+)_CTCATGCTATATAGGAGGGCCCTGCCAGGCACCGTCTCCTCTCTCCGG	>RPS26(+)_CCCTGCCAGGCACCGTCTCCTCTCTCCGG
chr7	43926456	43926457	UBE2D4	31	+	602	43	645	6	203	41	0	41	5	1	2	>UBE2D4(+)_GCGCGCAAGCGCAGGCTGCG	>UBE2D4(+)_GCGCGCAAGCGCAGGCTGCGGCTCCCGGCGTGCAGCTTGGTGGCGGCT	>UBE2D4(+)_GGCTCCCGGCGTGCAGCTTGGTGGCGGCT
chr20	49936398	49936399	RNF114	174	+	439	191	630	111	174	38	3	41	37	37	13	>RNF114(+)_CCTCGGCCTCCTCCTCATCG	>RNF114(+)_CCTCGGCCTCCTCCTCATCGGCCGCCGTTGCGCGGCGCAGAGCGGCAG	>RNF114(+)_GGCCGCCGTTGCGCGGCGCAGAGCGGCAG
chr20	35664899	35664900	CPNE1	170	-	465	145	610	82	243	35	6	41	24	15	18	>CPNE1(-)_CCTTCTGGAACGCGGAGCCG	>CPNE1(-)_CCTTCTGGAACGCGGAGCCGCTGAGCGGGCCGACGGCCATTTTGTGAA	>CPNE1(-)_GCTGAGCGGGCCGACGGCCATTTTGTGAA
chr20	35664899	35664900	RBM12	170	-	465	145	610	82	243	35	6	41	24	15	18	>RBM12(-)_CCTTCTGGAACGCGGAGCCG	>RBM12(-)_CCTTCTGGAACGCGGAGCCGCTGAGCGGGCCGACGGCCATTTTGTGAA	>RBM12(-)_GCTGAGCGGGCCGACGGCCATTTTGTGAA
chr17	30971023	30971024	RNF135	64	+	528	82	610	3	186	36	5	41	1	5	4	>RNF135(+)_GGCAAGGGGAAGAGGAAGGG	>RNF135(+)_GGCAAGGGGAAGAGGAAGGGCGAGGGAGGAGCCTGAGGAGACTCGCCC	>RNF135(+)_GCGAGGGAGGAGCCTGAGGAGACTCGCCC
chr10	119080815	119080816	EIF3A	72	-	273	313	586	22	145	24	17	41	5	6	11	>EIF3A(-)_GCAGCAGGGCCGCCGCGGGG	>EIF3A(-)_GCAGCAGGGCCGCCGCGGGGAGGTCACGTGGCTCCTTCCTTTCCGTCT	>EIF3A(-)_GAGGTCACGTGGCTCCTTCCTTTCCGTCT
chr12	26938469	26938470	FGFR1OP2	476	+	483	96	579	11	166	34	7	41	6	2	0	>FGFR1OP2(+)_CCCACAGTAACGCGAGGAAA	>FGFR1OP2(+)_CCCACAGTAACGCGAGGAAAGAAATCTCGCGAGGCTGGAGTTCTCCGG	>FGFR1OP2(+)_AGAAATCTCGCGAGGCTGGAGTTCTCCGG
chr6	170584617	170584618	PDCD2	257	-	421	120	541	6	189	39	2	41	4	8	7	>PDCD2(-)_GCCTTCCGGCCCGGCGCCCG	>PDCD2(-)_GCCTTCCGGCCCGGCGCCCGATTTCCGCCTTCCGACCCAGCTGTGGGC	>PDCD2(-)_GATTTCCGCCTTCCGACCCAGCTGTGGGC
chr2	70258148	70258149	PCYOX1	91	+	415	112	527	12	218	39	2	41	3	19	14	>PCYOX1(+)_AGCGGTGGGAGGACTGCGGG	>PCYOX1(+)_AGCGGTGGGAGGACTGCGGGGCTCTTGAGGCCAGCTGCAGAGCTTGTG	>PCYOX1(+)_GGCTCTTGAGGCCAGCTGCAGAGCTTGTG
chr9	86282537	86282538	ISCA1	989	-	375	141	516	35	201	37	4	41	12	25	8	>ISCA1(-)_TAGGACTGAGGGCGCCGTGC	>ISCA1(-)_TAGGACTGAGGGCGCCGTGCGCCGAAGCTTGTGGCGTCAATGCGCCCG	>ISCA1(-)_CGCCGAAGCTTGTGGCGTCAATGCGCCCG
chr8	143267479	143267480	GLI4	87	+	409	90	499	14	142	39	2	41	6	8	13	>GLI4(+)_GACACTTCCGTCCGGCGCGC	>GLI4(+)_GACACTTCCGTCCGGCGCGCGGCGTCCTCCTCCCGCTCGGAAGGTGAG	>GLI4(+)_CGGCGTCCTCCTCCCGCTCGGAAGGTGAG
chr2	27212360	27212361	ATRAID	133	+	369	118	487	47	228	35	6	41	14	14	8	>ATRAID(+)_CGCGGGGCCGGGTCGCGCGA	>ATRAID(+)_CGCGGGGCCGGGTCGCGCGAGCAGCGGAGCACCAAGGGAACGGAAAAT	>ATRAID(+)_AGCAGCGGAGCACCAAGGGAACGGAAAAT
chr4	185143265	185143266	SLC25A4	149	+	232	245	477	310	142	30	11	41	46	25	8	>SLC25A4(+)_CCGGCGGGGATATAAGGGGG	>SLC25A4(+)_CCGGCGGGGATATAAGGGGGAGCTGCGGGCCAGGCGGCGGCCCCCTAG	>SLC25A4(+)_GAGCTGCGGGCCAGGCGGCGGCCCCCTAG
chr6	153002688	153002689	MTRF1L	225	-	394	77	471	14	122	37	4	41	6	3	4	>MTRF1L(-)_GAACTTCCGGTTCCGGTCAG	>MTRF1L(-)_GAACTTCCGGTTCCGGTCAGGGTCCGCGATCTCGGACTAAGGATGCGG	>MTRF1L(-)_GGGTCCGCGATCTCGGACTAAGGATGCGG
chr2	219245497	219245498	STK16	175	+	369	97	466	13	238	37	4	41	16	4	4	>STK16(+)_GGCGCGGACTGATGATGTCA	>STK16(+)_GGCGCGGACTGATGATGTCAGCACTGCTTCCGGTCGGTGGCGCTTCTC	>STK16(+)_AGCACTGCTTCCGGTCGGTGGCGCTTCTC
chr16	14071363	14071364	MRTFB	81	+	407	37	444	1	161	39	2	41	6	5	9	>MRTFB(+)_CGCGGCGGCGGCGGGAGCGG	>MRTFB(+)_CGCGGCGGCGGCGGGAGCGGCGGCGGCGGCGGCCGGGGAGGTGAGCGG	>MRTFB(+)_GCGGCGGCGGCGGCCGGGGAGGTGAGCGG
chr17	64263259	64263260	TEX2	197	-	334	105	439	12	129	30	11	41	5	21	5	>TEX2(-)_GCGGCGTGTGCCCGGGGGCG	>TEX2(-)_GCGGCGTGTGCCCGGGGGCGGGCGGGCGGCAGGGCAGCAGGACCGCGG	>TEX2(-)_GGGCGGGCGGCAGGGCAGCAGGACCGCGG
chr11	47553139	47553140	CELF1	73	-	330	102	432	25	228	37	4	41	12	26	13	>CELF1(-)_TGCCCTCCCCGCCGGTGGTA	>CELF1(-)_TGCCCTCCCCGCCGGTGGTAGGTGCCGGAAGTGCCGCCATTTTGGGGT	>CELF1(-)_AGGTGCCGGAAGTGCCGCCATTTTGGGGT
chr10	68956169	68956170	DDX21	46	+	281	128	409	19	153	34	7	41	13	6	5	>DDX21(+)_AGTGACGAGAGCCGGGTGGA	>DDX21(+)_AGTGACGAGAGCCGGGTGGACCCAGGGTGGGGAACTACCTCTTCCTCT	>DDX21(+)_ACCCAGGGTGGGGAACTACCTCTTCCTCT
chr20	37289684	37289685	MANBAL	169	+	331	65	396	19	195	40	1	41	14	5	10	>MANBAL(+)_AGGGAACTACTTCCGGGGGA	>MANBAL(+)_AGGGAACTACTTCCGGGGGAGCGGCGCGGCGGCGCGGGAGGTGAGTGC	>MANBAL(+)_AGCGGCGCGGCGGCGCGGGAGGTGAGTGC
chr22	42857230	42857231	ARFGAP3	134	-	324	58	382	32	196	38	3	41	8	18	20	>ARFGAP3(-)_CCTCGTCGCTCCTGCTGAGG	>ARFGAP3(-)_CCTCGTCGCTCCTGCTGAGGCGGTAGCCGCTTTTCGTCGACTCTTACC	>ARFGAP3(-)_GCGGTAGCCGCTTTTCGTCGACTCTTACC
chr7	56106475	56106476	CHCHD2	223	-	296	78	374	10	209	38	3	41	3	1	7	>CHCHD2(-)_GTTGAGGCCAGCCCCGCCTC	>CHCHD2(-)_GTTGAGGCCAGCCCCGCCTCCCATCTTCCGGTCTCCTCAGAAGTCGCT	>CHCHD2(-)_CCCATCTTCCGGTCTCCTCAGAAGTCGCT
chr5	133968604	133968605	C5orf15	82	-	241	114	355	4	246	31	10	41	3	17	7	>C5orf15(-)_GGCGTCTGACCTCATGGCGT	>C5orf15(-)_GGCGTCTGACCTCATGGCGTAGAGCCTAGCAACAGCGCAGGCTCCCAG	>C5orf15(-)_TAGAGCCTAGCAACAGCGCAGGCTCCCAG
chr15	40470991	40470992	CHST14	91	+	246	93	339	5	86	33	8	41	2	5	2	>CHST14(+)_TGTGTCACTGCGAGGCCGGG	>CHST14(+)_TGTGTCACTGCGAGGCCGGGGGTGGAGAGCGGCCGGGCGGGACATCCG	>CHST14(+)_GGGTGGAGAGCGGCCGGGCGGGACATCCG
chr15	42208303	42208304	VPS39	61	-	249	70	319	21	220	37	4	41	4	2	5	>VPS39(-)_CGGCTGCGGAAGAGGCGGGC	>VPS39(-)_CGGCTGCGGAAGAGGCGGGCCTAACTAGCAGGAAGTCCGGGGTTGACG	>VPS39(-)_CCTAACTAGCAGGAAGTCCGGGGTTGACG
chr17	15999672	15999673	ZSWIM7	44	-	259	48	307	3	229	37	4	41	0	2	6	>ZSWIM7(-)_CGACGTCACTCCGTCTCGCC	>ZSWIM7(-)_CGACGTCACTCCGTCTCGCCCTGCCCCGGCGGGGGGTCAGGATCCTCC	>ZSWIM7(-)_CCTGCCCCGGCGGGGGGTCAGGATCCTCC
chr12	6470676	6470677	VAMP1	3239	-	365	736	1101	407	175	22	18	40	38	66	11	>VAMP1(-)_TCAGCACTAATAAAGGCGGA	>VAMP1(-)_TCAGCACTAATAAAGGCGGAGGCCGGCGCGGCAGCTGCAGTAAGTTCC	>VAMP1(-)_AGGCCGGCGCGGCAGCTGCAGTAAGTTCC
chr15	99251515	99251516	LRRC28	341	+	812	211	1023	40	178	36	4	40	4	3	3	>LRRC28(+)_GCCGTCCCCCGCTTGGCTTC	>LRRC28(+)_GCCGTCCCCCGCTTGGCTTCCAGCGCCGCTTGCGCTCCGGAGCGCTGG	>LRRC28(+)_CCAGCGCCGCTTGCGCTCCGGAGCGCTGG
chr17	35243073	35243074	SLFN5	143	+	273	609	882	605	132	26	14	40	74	38	9	>SLFN5(+)_AGCTGATATAAGCCCGGGAT	>SLFN5(+)_AGCTGATATAAGCCCGGGATCCCGCCGGGTCAGGTTCTCTGCTCTGGA	>SLFN5(+)_TCCCGCCGGGTCAGGTTCTCTGCTCTGGA
chr1	28259523	28259524	SESN2	638	+	426	446	872	124	146	29	11	40	29	9	8	>SESN2(+)_GGCTGAACTGCTGGTGTCAG	>SESN2(+)_GGCTGAACTGCTGGTGTCAGAGCCCGGCGAGCGCTGGCAGTTCCGCGG	>SESN2(+)_GAGCCCGGCGAGCGCTGGCAGTTCCGCGG
chr2	191678135	191678136	NABP1	865	+	242	551	793	201	124	24	16	40	38	19	11	>NABP1(+)_CGGGCCGAGGGTCCTGCCGG	>NABP1(+)_CGGGCCGAGGGTCCTGCCGGCGCGCGGGCGTGTTCATCAGTCGCTGTT	>NABP1(+)_GCGCGCGGGCGTGTTCATCAGTCGCTGTT
chr17	35809483	35809484	TAF15	592	+	475	286	761	104	207	28	12	40	33	59	26	>TAF15(+)_GGGTCCCGCAGTCCGCCTCA	>TAF15(+)_GGGTCCCGCAGTCCGCCTCAGCCCGCCGCGCCGCCCTCAGTACAGCTC	>TAF15(+)_AGCCCGCCGCGCCGCCCTCAGTACAGCTC
chr17	64506288	64506289	DDX5	459	-	288	447	735	700	165	24	16	40	65	76	16	>DDX5(-)_GTCCAGACTATAAAAGCGGC	>DDX5(-)_GTCCAGACTATAAAAGCGGCTGCCGGAAAGCGGCCGGCACCTCATTCA	>DDX5(-)_CTGCCGGAAAGCGGCCGGCACCTCATTCA
chr16	18801548	18801549	ARL6IP1	451	-	258	471	729	352	103	23	17	40	31	31	1	>ARL6IP1(-)_CGGCCGACCCATATAAGCAG	>ARL6IP1(-)_CGGCCGACCCATATAAGCAGCCTGCGGGGCGTTCCCTCGGGTTGTGGT	>ARL6IP1(-)_GCCTGCGGGGCGTTCCCTCGGGTTGTGGT
chr2	131093436	131093437	FAM168B	50	-	600	75	675	29	207	36	4	40	12	49	12	>FAM168B(-)_TCAGGCGGAAGTGAGGTCGG	>FAM168B(-)_TCAGGCGGAAGTGAGGTCGGCGGCTCCGGTGGCTGCGCAGCGTCGGCG	>FAM168B(-)_GCGGCTCCGGTGGCTGCGCAGCGTCGGCG
chr9	124861954	124861955	RPL35	111	-	374	283	657	85	176	29	11	40	32	34	25	>RPL35(-)_CCGGCAGTAGTTGCGGAGGT	>RPL35(-)_CCGGCAGTAGTTGCGGAGGTCAGCCCCGCCTACTTCCTCTTTCCCTCG	>RPL35(-)_TCAGCCCCGCCTACTTCCTCTTTCCCTCG
chr19	10543916	10543917	ATG4D	136	+	508	122	630	8	218	38	2	40	4	10	18	>ATG4D(+)_TTGGCCACGCCCACCGTCAT	>ATG4D(+)_TTGGCCACGCCCACCGTCATCCGGGGTCCTGGCCCGCTAAGATGGCGA	>ATG4D(+)_TCCGGGGTCCTGGCCCGCTAAGATGGCGA
chr17	4948529	4948530	PFN1	291	-	364	265	629	53	95	32	8	40	34	10	12	>PFN1(-)_GGGGGAGGAGCAGGAAGTGG	>PFN1(-)_GGGGGAGGAGCAGGAAGTGGCGGTGCGAGGGCTGCTGCACAGCGAGCG	>PFN1(-)_GCGGTGCGAGGGCTGCTGCACAGCGAGCG
chr2	189784334	189784335	ORMDL1	36	-	527	91	618	52	222	35	5	40	12	15	2	>ORMDL1(-)_AAAGCTTCCGCAAGCTGCGC	>ORMDL1(-)_AAAGCTTCCGCAAGCTGCGCAGCGCCGGGCCTGAGGGCGTGTATCCGC	>ORMDL1(-)_CAGCGCCGGGCCTGAGGGCGTGTATCCGC
chr19	18831958	18831959	UPF1	208	+	459	130	589	9	242	36	4	40	28	21	23	>UPF1(+)_GGCTCGCGCACGCGCACGGC	>UPF1(+)_GGCTCGCGCACGCGCACGGCGACGGCGGCGGTGGCGGCAGTTCCTGCT	>UPF1(+)_CGACGGCGGCGGTGGCGGCAGTTCCTGCT
chr2	109614363	109614364	SOWAHC	448	+	353	209	562	79	208	35	5	40	15	21	11	>SOWAHC(+)_CGCGGCCCAGTGAGGCGGTG	>SOWAHC(+)_CGCGGCCCAGTGAGGCGGTGGCCGAGTCCTCTGGCCTCAGACGCGTAG	>SOWAHC(+)_GGCCGAGTCCTCTGGCCTCAGACGCGTAG
chr3	40457338	40457339	RPL14	96	+	380	160	540	90	190	34	6	40	9	13	5	>RPL14(+)_TTCTTCTACACATGCGCAGG	>RPL14(+)_TTCTTCTACACATGCGCAGGGTTGGGCGGGTCTTCTTCCTTCTCGCCT	>RPL14(+)_GGTTGGGCGGGTCTTCTTCCTTCTCGCCT
chr19	12933708	12933709	FARSA	43	-	354	171	525	10	201	33	7	40	13	28	9	>FARSA(-)_GCTCCCCCCGCCCACCCGGG	>FARSA(-)_GCTCCCCCCGCCCACCCGGGCCCGGACACGCTGAGCACACTGGAAGGA	>FARSA(-)_GCCCGGACACGCTGAGCACACTGGAAGGA
chr17	17303348	17303349	NT5M	67	+	473	43	516	1	212	39	1	40	5	5	3	>NT5M(+)_CGCCCCGGGGCTCCGCCTCC	>NT5M(+)_CGCCCCGGGGCTCCGCCTCCGCCGGCGCGTGTTCCTTTAGGGACCGCG	>NT5M(+)_CGCCGGCGCGTGTTCCTTTAGGGACCGCG
chr2	199851149	199851150	FTCDNL1	29	-	487	28	515	1	179	37	3	40	2	0	0	>FTCDNL1(-)_CCGGCGGCAGACGCTGCGCG	>FTCDNL1(-)_CCGGCGGCAGACGCTGCGCGCGGGCCACGCGCGGCGGCGGAGGCTGCG	>FTCDNL1(-)_GCGGGCCACGCGCGGCGGCGGAGGCTGCG
chr4	39458914	39458915	RPL9	95	-	202	305	507	142	175	22	18	40	18	23	2	>RPL9(-)_CCCTTACGCGATACAAGTAC	>RPL9(-)_CCCTTACGCGATACAAGTACGTAATGACGACAGACGTTCTTTCTTTGC	>RPL9(-)_CGTAATGACGACAGACGTTCTTTCTTTGC
chr22	49918683	49918684	CRELD2	270	+	318	177	495	100	119	29	11	40	19	10	3	>CRELD2(+)_GCGCCGTCAAGTAGCCTGGG	>CRELD2(+)_GCGCCGTCAAGTAGCCTGGGGGACAGGCCGGCGCGGCTGGGAGCGGGT	>CRELD2(+)_GGGACAGGCCGGCGCGGCTGGGAGCGGGT
chr1	100038113	100038114	MFSD14A	171	+	351	144	495	22	155	28	12	40	7	11	15	>MFSD14A(+)_ACGATTGTGACGCGCCGCCG	>MFSD14A(+)_ACGATTGTGACGCGCCGCCGGAGGCAGGCCGGGCCCTCAAGATGGCGG	>MFSD14A(+)_GGAGGCAGGCCGGGCCCTCAAGATGGCGG
chr17	28552624	28552625	UNC119	172	-	382	89	471	2	216	34	6	40	6	9	10	>UNC119(-)_CTGGGGCCCCGGCCGGGGGC	>UNC119(-)_CTGGGGCCCCGGCCGGGGGCGGGGCTGCGGATGCTCCCACTTCCCCCG	>UNC119(-)_CGGGGCTGCGGATGCTCCCACTTCCCCCG
chr9	93451516	93451517	FAM120AOS	69	-	360	97	457	22	180	32	8	40	8	1	0	>FAM120AOS(-)_CGGGGCTCCCGGAGGCGGCG	>FAM120AOS(-)_CGGGGCTCCCGGAGGCGGCGGCGGAGGCGGAGGCCCGGAGTTGGGCCG	>FAM120AOS(-)_GGCGGAGGCGGAGGCCCGGAGTTGGGCCG
chr17	18258704	18258705	FLII	61	-	326	131	457	18	137	36	4	40	5	15	10	>FLII(-)_CCCTCGCCCCGGCGCTCCCT	>FLII(-)_CCCTCGCCCCGGCGCTCCCTAGCCCGGCGCGGCCCGGCAGCGAGAGCG	>FLII(-)_TAGCCCGGCGCGGCCCGGCAGCGAGAGCG
chr17	46194043	46194044	KANSL1	135	-	351	104	455	11	303	29	11	40	7	7	4	>KANSL1(-)_CAGTGACTACGTGCACCCTC	>KANSL1(-)_CAGTGACTACGTGCACCCTCCCCACCCCGCCCAACTCTGGTGGCTGCG	>KANSL1(-)_CCCCACCCCGCCCAACTCTGGTGGCTGCG
chr6	99515417	99515418	USP45	293	-	328	123	451	13	227	36	4	40	14	2	4	>USP45(-)_GGAGCGGGACGAGCGCGCAG	>USP45(-)_GGAGCGGGACGAGCGCGCAGGCGCAGTCTCCCCAGGTTGTAGACGCTG	>USP45(-)_GGCGCAGTCTCCCCAGGTTGTAGACGCTG
chr16	3135161	3135162	ZNF213	32	+	368	78	446	7	179	36	4	40	3	7	4	>ZNF213(+)_CGGGGCGGGGACGGGGCCTC	>ZNF213(+)_CGGGGCGGGGACGGGGCCTCTGGCCGCCTGGCTCCAACATCAAGCACC	>ZNF213(+)_CTGGCCGCCTGGCTCCAACATCAAGCACC
chr11	65386636	65386637	FRMD8	118	+	306	137	443	55	163	33	7	40	10	54	21	>FRMD8(+)_GCCTCGGGCGCCGCGCTTCC	>FRMD8(+)_GCCTCGGGCGCCGCGCTTCCTCCCGCCGTGGCTTCCGCGTCGCTTCCC	>FRMD8(+)_CTCCCGCCGTGGCTTCCGCGTCGCTTCCC
chr7	156949735	156949736	NOM1	178	+	325	104	429	8	285	35	5	40	19	5	17	>NOM1(+)_CCGCCTCGGCCGGAAGTCGT	>NOM1(+)_CCGCCTCGGCCGGAAGTCGTGCGTCCACGCGTTTCGAAAGATGGCGGC	>NOM1(+)_TGCGTCCACGCGTTTCGAAAGATGGCGGC
chr10	73785605	73785606	ZSWIM8	122	+	293	123	416	9	185	34	6	40	6	0	9	>ZSWIM8(+)_CGGAAGTCCAGATCAGCTGA	>ZSWIM8(+)_CGGAAGTCCAGATCAGCTGATGGGGGAGGCGGCTCCGCAGCCGCCTAG	>ZSWIM8(+)_ATGGGGGAGGCGGCTCCGCAGCCGCCTAG
chr7	111562491	111562492	IMMP2L	42	-	353	57	410	7	194	39	1	40	3	5	2	>IMMP2L(-)_CGGAGCTTGCCGCCGGCGGA	>IMMP2L(-)_CGGAGCTTGCCGCCGGCGGAGGGCGGGGTCTGCGCGGGGACTTCCCCC	>IMMP2L(-)_AGGGCGGGGTCTGCGCGGGGACTTCCCCC
chr6	33208499	33208500	RING1	63	+	321	78	399	26	212	39	1	40	7	2	10	>RING1(+)_GGGGGAGCGGGTGTAGCGGA	>RING1(+)_GGGGGAGCGGGTGTAGCGGAGGAGCAGGCGGAAGTGACGTAGGGCCCC	>RING1(+)_AGGAGCAGGCGGAAGTGACGTAGGGCCCC
chr1	36397887	36397888	LSM10	448	-	341	57	398	28	179	37	3	40	13	11	4	>LSM10(-)_GACTTGCAGAGCACTGACGC	>LSM10(-)_GACTTGCAGAGCACTGACGCACTCTGCGCCCGGAGGACAGAGCGGCCC	>LSM10(-)_CACTCTGCGCCCGGAGGACAGAGCGGCCC
chr9	137551924	137551925	MRPL41	47	+	291	84	375	3	206	38	2	40	5	0	3	>MRPL41(+)_TGCGACGCAGCGGTCGGAAG	>MRPL41(+)_TGCGACGCAGCGGTCGGAAGCGGAGCAAGGTCGAGGCCGGGTTGGCGC	>MRPL41(+)_GCGGAGCAAGGTCGAGGCCGGGTTGGCGC
chr16	2251568	2251569	ECI1	17	-	258	100	358	16	187	37	3	40	6	13	8	>ECI1(-)_GAGCTCAGCCCGCGACCTTT	>ECI1(-)_GAGCTCAGCCCGCGACCTTTATCCCGCGCGTTGCGGTCAAGATGGCGC	>ECI1(-)_TATCCCGCGCGTTGCGGTCAAGATGGCGC
chr6	117602491	117602492	GOPC	49	-	227	117	344	2	223	33	7	40	2	8	16	>GOPC(-)_CGGGGGCAGGCTGGGAGGTG	>GOPC(-)_CGGGGGCAGGCTGGGAGGTGGGACTGACTGAGTCTTCCGTGTGTCGCC	>GOPC(-)_GGGACTGACTGAGTCTTCCGTGTGTCGCC
chr1	93879177	93879178	DNTTIP2	34	-	230	68	298	17	224	34	6	40	3	2	0	>DNTTIP2(-)_GTTCTCTGACGCATTTCCGG	>DNTTIP2(-)_GTTCTCTGACGCATTTCCGGAGCGCCAGGGAAGAGGGAAGTCGTGGTG	>DNTTIP2(-)_GAGCGCCAGGGAAGAGGGAAGTCGTGGTG
chr5	892800	892801	BRD9	62	-	263	30	293	6	239	40	0	40	3	8	4	>BRD9(-)_CGGCAGGGCCACTTCCTGCC	>BRD9(-)_CGGCAGGGCCACTTCCTGCCGCGGCCCCGCCTCGCCCCGTTTCCGGCG	>BRD9(-)_CGCGGCCCCGCCTCGCCCCGTTTCCGGCG
chr22	40370622	40370623	SGSM3	18	+	200	72	272	8	216	32	8	40	0	1	2	>SGSM3(+)_CGCCCCGCCACGCGTGCGCT	>SGSM3(+)_CGCCCCGCCACGCGTGCGCTTAGGCGCCGCTGAGCGCTGACTGGGTGC	>SGSM3(+)_TTAGGCGCCGCTGAGCGCTGACTGGGTGC
chr11	47715368	47715369	AGBL2	125	-	176	87	263	0	125	34	6	40	3	1	3	>AGBL2(-)_CCGCCCCGCCCTTTCTCCGC	>AGBL2(-)_CCGCCCCGCCCTTTCTCCGCTTCCTGCTTTCGGTTGCTAGACTACCCG	>AGBL2(-)_CTTCCTGCTTTCGGTTGCTAGACTACCCG
chr11	66257767	66257768	KLC2	50	+	120	52	172	8	182	35	5	40	5	3	4	>KLC2(+)_GGTAGCGGCTTCACCTTTAA	>KLC2(+)_GGTAGCGGCTTCACCTTTAAGGCGGCGCGGGGGCTGCTGGGAAGGCCG	>KLC2(+)_AGGCGGCGCGGGGGCTGCTGGGAAGGCCG
chr17	50866353	50866354	TOB1	4281	-	406	843	1249	581	93	22	17	39	48	102	26	>TOB1(-)_GGAGGCCATAAAACGAGAGG	>TOB1(-)_GGAGGCCATAAAACGAGAGGCGGGGCGCGCGCCGCGGCAGAAGGAGCG	>TOB1(-)_GCGGGGCGCGCGCCGCGGCAGAAGGAGCG
chr6	31815542	31815543	HSPA1A	1649	+	418	711	1129	527	145	19	20	39	61	42	5	>HSPA1A(+)_TGACGACTTATAAAAGCCCA	>HSPA1A(+)_TGACGACTTATAAAAGCCCAGGGGCAAGCGGTCCGGATAACGGCTAGC	>HSPA1A(+)_AGGGGCAAGCGGTCCGGATAACGGCTAGC
chr1	32964812	32964813	RNF19B	239	-	573	433	1006	319	137	32	7	39	32	87	19	>RNF19B(-)_GCGGAGGCTTTATAATCACT	>RNF19B(-)_GCGGAGGCTTTATAATCACTTCGTCGTTGCCGCTCGGCTTCTATCGCC	>RNF19B(-)_TTCGTCGTTGCCGCTCGGCTTCTATCGCC
chr15	32718003	32718004	GREM1	315	+	394	434	828	187	104	22	17	39	16	38	18	>GREM1(+)_CCGCCGGCATTTAAACGGGA	>GREM1(+)_CCGCCGGCATTTAAACGGGAGACGGCGCGATGCCTGGCACTCGGTGCG	>GREM1(+)_AGACGGCGCGATGCCTGGCACTCGGTGCG
chr6	26020455	26020456	HIST1H3A	373	+	230	570	800	779	94	25	14	39	72	110	25	>HIST1H3A(+)_ACACTATAAATAGAGCAGCT	>HIST1H3A(+)_ACACTATAAATAGAGCAGCTCATGGGCGTATTTGCGCTAGTGTTGGGT	>HIST1H3A(+)_TCATGGGCGTATTTGCGCTAGTGTTGGGT
chr11	69641155	69641156	CCND1	1491	+	144	640	784	225	121	12	27	39	19	11	8	>CCND1(+)_GGGGAGTTTTGTTGAAGTTG	>CCND1(+)_GGGGAGTTTTGTTGAAGTTGCAAAGTCCTGGAGCCTCCAGAGGGCTGT	>CCND1(+)_GCAAAGTCCTGGAGCCTCCAGAGGGCTGT
chr13	102773741	102773742	TEX30	618	-	537	209	746	6	175	32	7	39	6	5	2	>TEX30(-)_TGTGGCGGGGCAGGCGAGGC	>TEX30(-)_TGTGGCGGGGCAGGCGAGGCGGTCGCTTCGAGCGCGCTAGTCAGCTCC	>TEX30(-)_CGGTCGCTTCGAGCGCGCTAGTCAGCTCC
chr1	89995150	89995151	ZNF326	63	+	521	204	725	22	181	34	5	39	12	23	10	>ZNF326(+)_CTCGCTGTGGCCTGCGGCTC	>ZNF326(+)_CTCGCTGTGGCCTGCGGCTCCCGGGCTGGTAGCGCGCCGCTCTCGGTC	>ZNF326(+)_CCCGGGCTGGTAGCGCGCCGCTCTCGGTC
chr12	116738022	116738023	C12orf49	229	-	472	226	698	35	135	35	4	39	13	5	0	>C12orf49(-)_GGGCTGCGCCCAAGGCTGCC	>C12orf49(-)_GGGCTGCGCCCAAGGCTGCCGGGAGCAGACTGGGCTGCGGGCGGCGGG	>C12orf49(-)_CGGGAGCAGACTGGGCTGCGGGCGGCGGG
chr6	31834915	31834916	SNHG32	168	+	295	391	686	498	124	30	9	39	117	282	105	>SNHG32(+)_GCGCCGCCATAAATGGCCCC	>SNHG32(+)_GCGCCGCCATAAATGGCCCCGGCCTCGCCATTTTAGTTCTTTTTGCGA	>SNHG32(+)_CGGCCTCGCCATTTTAGTTCTTTTTGCGA
chr1	23778417	23778418	PITHD1	2071	+	467	203	670	23	164	30	9	39	3	10	2	>PITHD1(+)_AGCGGCGCTTTTTACGACGC	>PITHD1(+)_AGCGGCGCTTTTTACGACGCGGCAGGCGCGGCGCGCTTAGTTGCCGGA	>PITHD1(+)_CGGCAGGCGCGGCGCGCTTAGTTGCCGGA
chr2	233354504	233354505	DGKD	19	+	595	70	665	0	193	37	2	39	7	0	0	>DGKD(+)_CCCGCCGGCCCCGCCCCGCC	>DGKD(+)_CCCGCCGGCCCCGCCCCGCCCCCGCCCGCGGTGCGCGCGCTGGCCCGG	>DGKD(+)_CCCCGCCCGCGGTGCGCGCGCTGGCCCGG
chr2	9630969	9630970	YWHAQ	210	-	457	171	628	156	133	36	3	39	8	72	11	>YWHAQ(-)_GGTCCTCAGCTAAAGCCAAA	>YWHAQ(-)_GGTCCTCAGCTAAAGCCAAAAGCAGATCAAAGTGGTGGGACTCGCGTC	>YWHAQ(-)_AAGCAGATCAAAGTGGTGGGACTCGCGTC
chr13	20525825	20525826	CRYL1	46	-	517	103	620	40	203	36	3	39	7	6	15	>CRYL1(-)_GGAGCCCAGAGCTCGCAGCT	>CRYL1(-)_GGAGCCCAGAGCTCGCAGCTCCGCCGGCGCCTGGTCCCAGCGCCCGCG	>CRYL1(-)_TCCGCCGGCGCCTGGTCCCAGCGCCCGCG
chr10	1048885	1048886	IDI1	442	-	365	244	609	179	164	29	10	39	18	38	10	>IDI1(-)_ACTGTGCTCAAAGCGGGCGC	>IDI1(-)_ACTGTGCTCAAAGCGGGCGCCATCCGGGACCGGCGGTTGTCTGTGGCC	>IDI1(-)_CCATCCGGGACCGGCGGTTGTCTGTGGCC
chr21	45981769	45981770	COL6A1	1623	+	250	352	602	89	125	27	12	39	11	31	17	>COL6A1(+)_TCCCCTCCTTGCCCTCCGCT	>COL6A1(+)_TCCCCTCCTTGCCCTCCGCTCTCACTCTGGCTGGGAGCAGAAGGCAGC	>COL6A1(+)_TCTCACTCTGGCTGGGAGCAGAAGGCAGC
chr13	73059004	73059005	KLF5	489	+	366	224	590	114	126	28	11	39	16	25	4	>KLF5(+)_GGAGTTGGGTGAAATAGAGG	>KLF5(+)_GGAGTTGGGTGAAATAGAGGCGGGCGTCAAGTGTCAGTAGTCGCGGGG	>KLF5(+)_GCGGGCGTCAAGTGTCAGTAGTCGCGGGG
chr17	40140543	40140544	CASC3	64	+	462	100	562	45	246	38	1	39	14	26	8	>CASC3(+)_GCGGTGCGTAAGTACCTCGC	>CASC3(+)_GCGGTGCGTAAGTACCTCGCCGGTGGTGGCCGTTCTCCGTAAGATGGC	>CASC3(+)_CCGGTGGTGGCCGTTCTCCGTAAGATGGC
chr20	5119957	5119958	PCNA	282	-	371	186	557	200	157	34	5	39	39	44	13	>PCNA(-)_GGCGCAGGGTGAGAGCGCGC	>PCNA(-)_GGCGCAGGGTGAGAGCGCGCGCTTGCGGACGCGGCGGCATTAAACGGT	>PCNA(-)_CGCTTGCGGACGCGGCGGCATTAAACGGT
chr4	151015726	151015727	LRBA	119	-	503	48	551	16	225	36	3	39	18	2	2	>LRBA(-)_GCGCACTCGCGCTCGCGCAC	>LRBA(-)_GCGCACTCGCGCTCGCGCACGCGCACGCCGCGCCCGGCAGCACTCGGC	>LRBA(-)_CGCGCACGCCGCGCCCGGCAGCACTCGGC
chr6	33711695	33711696	UQCC2	215	-	405	129	534	14	204	37	2	39	7	10	2	>UQCC2(-)_CGTCGGCGCCGACTCCTCCC	>UQCC2(-)_CGTCGGCGCCGACTCCTCCCGCTAAGGCGGGAACACGCGGGGCCCAAG	>UQCC2(-)_CGCTAAGGCGGGAACACGCGGGGCCCAAG
chr2	240561055	240561056	ANKMY1	50	-	428	94	522	10	194	36	3	39	4	19	14	>ANKMY1(-)_CCTAAAGGCCCGCCCACCTG	>ANKMY1(-)_CCTAAAGGCCCGCCCACCTGGAAGGCCTTCGCCAGGCTGAGGCCGCGG	>ANKMY1(-)_GGAAGGCCTTCGCCAGGCTGAGGCCGCGG
chr1	92299058	92299059	RPAP2	486	+	404	117	521	29	200	36	3	39	6	9	6	>RPAP2(+)_GCCTCGGGGCGAGACGCCGG	>RPAP2(+)_GCCTCGGGGCGAGACGCCGGAGCGTGTCCCCGTCCGGCAGACTACTCT	>RPAP2(+)_GAGCGTGTCCCCGTCCGGCAGACTACTCT
chr11	72814434	72814435	ATG16L2	87	+	452	68	520	12	178	37	2	39	5	7	9	>ATG16L2(+)_GCGCCGTCCTGGGCGGGAGG	>ATG16L2(+)_GCGCCGTCCTGGGCGGGAGGAACGCGCCGCTAGGCGGGAGAGCGCGGC	>ATG16L2(+)_GAACGCGCCGCTAGGCGGGAGAGCGCGGC
chr8	47960141	47960142	PRKDC	41	-	340	170	510	18	237	34	5	39	14	19	32	>PRKDC(-)_GCATTTCCGGGTCCGGGCCG	>PRKDC(-)_GCATTTCCGGGTCCGGGCCGAGCGGGCGCACGCGCGGGAGCGGGACTC	>PRKDC(-)_GAGCGGGCGCACGCGCGGGAGCGGGACTC
chr3	101686704	101686705	RPL24	157	-	278	218	496	87	187	35	4	39	18	49	17	>RPL24(-)_ATAAGGTCTCTTCCCATGAT	>RPL24(-)_ATAAGGTCTCTTCCCATGATTCTCTCTTTCTTTTCGCCATCTTTTGTC	>RPL24(-)_TTCTCTCTTTCTTTTCGCCATCTTTTGTC
chr15	74843137	74843138	ULK3	67	-	410	80	490	12	184	35	4	39	3	6	2	>ULK3(-)_GGCCCGCCCCGCAACCCGCC	>ULK3(-)_GGCCCGCCCCGCAACCCGCCGGAACCGCCGCCCGCAGCGAGGAAGCGC	>ULK3(-)_CGGAACCGCCGCCCGCAGCGAGGAAGCGC
chr16	680409	680410	STUB1	139	+	420	70	490	8	181	37	2	39	4	6	1	>STUB1(+)_CCCCGCTGGTCCCGCCCCCG	>STUB1(+)_CCCCGCTGGTCCCGCCCCCGGCCGGAAGTTCCGGCGGCGGAGCTGGGC	>STUB1(+)_GGCCGGAAGTTCCGGCGGCGGAGCTGGGC
chr7	141551409	141551410	AGK	158	+	407	71	478	15	161	36	3	39	14	1	3	>AGK(+)_ACGAGCCGGGGAATCTGGAG	>AGK(+)_ACGAGCCGGGGAATCTGGAGGGAGCACACAGGAAAGGCAGAGCCGCGA	>AGK(+)_GGGAGCACACAGGAAAGGCAGAGCCGCGA
chr16	69311356	69311357	VPS4A	60	+	402	75	477	15	189	35	4	39	6	6	6	>VPS4A(+)_GCCCGACCGCTCTGGGCTGC	>VPS4A(+)_GCCCGACCGCTCTGGGCTGCGCTCCTCGCTTGCCCTCGGACTCGGCTC	>VPS4A(+)_CGCTCCTCGCTTGCCCTCGGACTCGGCTC
chr11	130916474	130916475	SNX19	48	-	430	42	472	23	226	36	3	39	8	7	4	>SNX19(-)_CAGCATGCCTCGCTCCCGTC	>SNX19(-)_CAGCATGCCTCGCTCCCGTCGACGTCGACCCGGAAGCTGTCGCCGGCG	>SNX19(-)_CGACGTCGACCCGGAAGCTGTCGCCGGCG
chr17	63774186	63774187	DDX42	39	+	364	102	466	11	185	35	4	39	3	4	8	>DDX42(+)_CACTGCGCATGTCGCGTTTT	>DDX42(+)_CACTGCGCATGTCGCGTTTTTGTTCCCCTCCCCCCTTCAGCAACGGGC	>DDX42(+)_TTGTTCCCCTCCCCCCTTCAGCAACGGGC
chr11	207388	207389	BET1L	31	-	377	85	462	5	168	36	3	39	2	8	16	>BET1L(-)_TCGCTAGCTGGGGGCGGGGC	>BET1L(-)_TCGCTAGCTGGGGGCGGGGCCGGAAGCTCTTTCCCCGCGACTGCGCCA	>BET1L(-)_CCGGAAGCTCTTTCCCCGCGACTGCGCCA
chr19	19033524	19033525	SUGP2	37	-	360	98	458	1	188	29	10	39	4	0	2	>SUGP2(-)_GCGCCTGCGCGGCGCGGCGC	>SUGP2(-)_GCGCCTGCGCGGCGCGGCGCTGCGGAGACCGTTGGTTCATTTGCATGT	>SUGP2(-)_CTGCGGAGACCGTTGGTTCATTTGCATGT
chr22	38273004	38273005	TMEM184B	196	-	354	102	456	74	164	36	3	39	29	7	1	>TMEM184B(-)_GGCGAGCCCAGAGCGCATGC	>TMEM184B(-)_GGCGAGCCCAGAGCGCATGCGCGCCGCGGCTGCACTCCACTGGGCCCG	>TMEM184B(-)_CGCGCCGCGGCTGCACTCCACTGGGCCCG
chr9	137205647	137205648	TMEM203	85	-	362	91	453	8	279	36	3	39	16	4	6	>TMEM203(-)_CGCCGTCGACCGGAAGTGAC	>TMEM203(-)_CGCCGTCGACCGGAAGTGACGCACTAGGGACGCGCCCTGTGGGGGCAT	>TMEM203(-)_CGCACTAGGGACGCGCCCTGTGGGGGCAT
chr3	47825014	47825015	DHX30	74	+	330	100	430	21	216	34	5	39	15	10	5	>DHX30(+)_GCCGCTCCCGTTCTCTTCGC	>DHX30(+)_GCCGCTCCCGTTCTCTTCGCCCGGTCCCTGCCGCGCACAGGCCTCGGG	>DHX30(+)_CCCGGTCCCTGCCGCGCACAGGCCTCGGG
chr17	63827449	63827450	PSMC5	234	+	298	75	373	20	226	36	3	39	12	4	8	>PSMC5(+)_CTTCAGGTCCCAATCCTCCG	>PSMC5(+)_CTTCAGGTCCCAATCCTCCGCTTCCGCGCTTGCGCGCCAAGACGGCTC	>PSMC5(+)_GCTTCCGCGCTTGCGCGCCAAGACGGCTC
chr3	184174889	184174890	AP2M1	97	+	275	78	353	29	168	35	4	39	4	2	4	>AP2M1(+)_GGCACTGCGGTGAAAGCCGA	>AP2M1(+)_GGCACTGCGGTGAAAGCCGAGGCAGCGGGCAGACGAGCAGGGGGCGGG	>AP2M1(+)_AGGCAGCGGGCAGACGAGCAGGGGGCGGG
chr19	10315995	10315996	FDX2	45	-	254	99	353	6	213	32	7	39	7	6	6	>FDX2(-)_CGGCGCATGCTCAGTCGGTG	>FDX2(-)_CGGCGCATGCTCAGTCGGTGAGTCACGTGATGCATGTCATGGCCGCCT	>FDX2(-)_GAGTCACGTGATGCATGTCATGGCCGCCT
chr7	105532178	105532179	RINT1	41	+	306	44	350	1	231	38	1	39	1	3	0	>RINT1(+)_CGGGCAGGGCCTCTCTGGGC	>RINT1(+)_CGGGCAGGGCCTCTCTGGGCTGAGAGGAAGAAACCAGTGAGACATCGA	>RINT1(+)_CTGAGAGGAAGAAACCAGTGAGACATCGA
chr10	3785230	3785231	KLF6	161	-	213	129	342	28	129	34	5	39	9	18	6	>KLF6(-)_GGCGGAGGGGGAGGCTGGCA	>KLF6(-)_GGCGGAGGGGGAGGCTGGCAGCGGAGCTTTGAATAGGGAAGTTTTGCA	>KLF6(-)_AGCGGAGCTTTGAATAGGGAAGTTTTGCA
chr17	82418585	82418586	OGFOD3	19	-	320	13	333	6	322	39	0	39	3	10	7	>OGFOD3(-)_TGGCCGCCAGCCCAGGGGCC	>OGFOD3(-)_TGGCCGCCAGCCCAGGGGCCGATGGCCGAGCGCGTCGCACTCGCGTCC	>OGFOD3(-)_CGATGGCCGAGCGCGTCGCACTCGCGTCC
chr12	113358589	113358590	PLBD2	108	+	292	39	331	18	169	37	2	39	8	4	12	>PLBD2(+)_CAGAGCGCAGTCACGTGACC	>PLBD2(+)_CAGAGCGCAGTCACGTGACCCGGGCTGCGGGGCGCAGCATTGTGCGGT	>PLBD2(+)_CCGGGCTGCGGGGCGCAGCATTGTGCGGT
chr9	135500682	135500683	MRPS2	108	+	255	58	313	12	188	36	3	39	5	14	13	>MRPS2(+)_GCGACGGAAGGGGAGGCCGC	>MRPS2(+)_GCGACGGAAGGGGAGGCCGCTCGGCCTGGCCTGGAGGGAGACCTCGCT	>MRPS2(+)_CTCGGCCTGGCCTGGAGGGAGACCTCGCT
chr18	76822911	76822912	ZNF236	89	+	256	53	309	13	129	35	4	39	6	0	7	>ZNF236(+)_GCTGGGCCTACTTTCCTGGG	>ZNF236(+)_GCTGGGCCTACTTTCCTGGGCCGGGCGGCGGCTGAGGCGGGAGGCGGG	>ZNF236(+)_GCCGGGCGGCGGCTGAGGCGGGAGGCGGG
chr9	32552336	32552337	SMIM27	17	+	246	58	304	0	219	34	5	39	2	2	6	>SMIM27(+)_GCTGCACGAAGCGAGTGGGC	>SMIM27(+)_GCTGCACGAAGCGAGTGGGCGGGCGCTCGTGCCCGGCTAAAAGATGGC	>SMIM27(+)_CGGGCGCTCGTGCCCGGCTAAAAGATGGC
chr16	74296813	74296814	PSMD7	72	+	236	60	296	39	162	35	4	39	23	17	7	>PSMD7(+)_GGAGCGGAAGAAGGAGGCCG	>PSMD7(+)_GGAGCGGAAGAAGGAGGCCGCGCGAGGGCTGACGAACCGGAAGAAGAG	>PSMD7(+)_GCGCGAGGGCTGACGAACCGGAAGAAGAG
chr19	49453284	49453285	ALDH16A1	24	+	215	56	271	3	56	34	5	39	1	20	11	>ALDH16A1(+)_ACCGGAGGTGTCGCTCTTCG	>ALDH16A1(+)_ACCGGAGGTGTCGCTCTTCGGACCTCAAGGTTCCCCTTAACACAGAGC	>ALDH16A1(+)_GGACCTCAAGGTTCCCCTTAACACAGAGC
chr9	136439813	136439814	INPP5E	63	-	215	53	268	6	182	34	5	39	1	7	12	>INPP5E(-)_CGGCCCCGCGGCGGCGGTTG	>INPP5E(-)_CGGCCCCGCGGCGGCGGTTGCTGGGTCCCGGCCGGGCTGACTCCGCTT	>INPP5E(-)_GCTGGGTCCCGGCCGGGCTGACTCCGCTT
chr1	20508128	20508129	MUL1	72	-	216	49	265	9	203	35	4	39	2	3	6	>MUL1(-)_TGCGTCATCGCTGGGCGACT	>MUL1(-)_TGCGTCATCGCTGGGCGACTGATTTCGAGTTTCCGGTCAGGTTAGGCC	>MUL1(-)_TGATTTCGAGTTTCCGGTCAGGTTAGGCC
chr19	12945844	12945845	RAD23A	40	+	172	83	255	9	117	27	12	39	4	0	0	>RAD23A(+)_GTGCGCCGGTGGTCAGCGCG	>RAD23A(+)_GTGCGCCGGTGGTCAGCGCGCGCATTGCCTGCCCCGGAAGTGGTCGGC	>RAD23A(+)_GCGCATTGCCTGCCCCGGAAGTGGTCGGC
chr19	32691858	32691859	NUDT19	168	+	190	59	249	6	139	36	3	39	6	4	1	>NUDT19(+)_AAACGCCCAGGTTCACCCAA	>NUDT19(+)_AAACGCCCAGGTTCACCCAACGCCAGAGGCTCGTCCTCAATTCCCGCG	>NUDT19(+)_ACGCCAGAGGCTCGTCCTCAATTCCCGCG
chr19	37719733	37719734	ZNF607	79	-	166	69	235	2	144	30	9	39	0	3	4	>ZNF607(-)_CGAGGCAAGGCGGCCACTCC	>ZNF607(-)_CGAGGCAAGGCGGCCACTCCCAGAAGTCTCCGGGGCTCGAGCGGTGGG	>ZNF607(-)_CCAGAAGTCTCCGGGGCTCGAGCGGTGGG
chr2	85539167	85539168	MAT2A	539	+	443	704	1147	1085	89	25	13	38	74	140	21	>MAT2A(+)_CTGCTCTATAAATACCGGGC	>MAT2A(+)_CTGCTCTATAAATACCGGGCCGCACCGCCCGCTGCTTCGTTCGCTCCG	>MAT2A(+)_CCGCACCGCCCGCTGCTTCGTTCGCTCCG
chr12	48682234	48682235	KANSL2	256	-	765	171	936	54	194	34	4	38	27	6	14	>KANSL2(-)_AAAGGGGCGAGGCCGATCTG	>KANSL2(-)_AAAGGGGCGAGGCCGATCTGAGAGCCGCTGGCGCCACTAGAGAAGGGC	>KANSL2(-)_GAGAGCCGCTGGCGCCACTAGAGAAGGGC
chr9	111896813	111896814	UGCG	2563	+	619	240	859	106	187	33	5	38	24	32	25	>UGCG(+)_CGCGCCGAGGAGTGGGGCGC	>UGCG(+)_CGCGCCGAGGAGTGGGGCGCGAGCCGCCGGTTTTGATTAGTGCGCGGA	>UGCG(+)_CGAGCCGCCGGTTTTGATTAGTGCGCGGA
chr9	129036649	129036650	MIGA2	112	+	604	194	798	8	236	36	2	38	2	0	1	>MIGA2(+)_CGGGCGGCCGGTTTGGTTGC	>MIGA2(+)_CGGGCGGCCGGTTTGGTTGCGCAGCCGCCGGGGAAGGAGACGCTGCCC	>MIGA2(+)_CGCAGCCGCCGGGGAAGGAGACGCTGCCC
chr12	6867532	6867533	TPI1	1092	+	371	414	785	676	90	30	8	38	66	189	44	>TPI1(+)_GCGCTCTATATAAGTGGGCA	>TPI1(+)_GCGCTCTATATAAGTGGGCAGTGGCCGCGACTGCGCGCAGACACTGAC	>TPI1(+)_AGTGGCCGCGACTGCGCGCAGACACTGAC
chr12	122526935	122526936	RSRC2	398	-	562	182	744	86	231	33	5	38	12	51	23	>RSRC2(-)_CGCCTTTGTGCCATCCGGGT	>RSRC2(-)_CGCCTTTGTGCCATCCGGGTCTCTCGCGCGAGCGATTTAGTCTGAGGC	>RSRC2(-)_TCTCTCGCGCGAGCGATTTAGTCTGAGGC
chr12	49265081	49265082	TUBA1C	460	+	312	426	738	968	90	25	13	38	89	322	63	>TUBA1C(+)_CCGGGTATATAAGGCCCTTC	>TUBA1C(+)_CCGGGTATATAAGGCCCTTCGGGGCCGGCCACCCTTTCACTACTTCTC	>TUBA1C(+)_CGGGGCCGGCCACCCTTTCACTACTTCTC
chr9	137241286	137241287	TUBB4B	1331	+	275	446	721	932	67	29	9	38	87	286	64	>TUBB4B(+)_CAGGGAGGGTATATAAGCGT	>TUBB4B(+)_CAGGGAGGGTATATAAGCGTTGGCGGAGCGTCGGTTGTAGCACTCTGC	>TUBB4B(+)_TTGGCGGAGCGTCGGTTGTAGCACTCTGC
chr7	16646188	16646189	BZW2	452	+	375	344	719	118	203	31	7	38	10	153	65	>BZW2(+)_CGTGTGTCTATGTCAATGTG	>BZW2(+)_CGTGTGTCTATGTCAATGTGTCTGTCCTTCACTCCTCCATTGTCTGCC	>BZW2(+)_GTCTGTCCTTCACTCCTCCATTGTCTGCC
chr22	37019446	37019447	TST	1674	-	402	317	719	47	179	28	10	38	11	48	13	>TST(-)_GCCGCCTGGGGAGCTGCGGC	>TST(-)_GCCGCCTGGGGAGCTGCGGCCGGGGGTTTGAACCGGCCAACTTCTCCA	>TST(-)_CCGGGGGTTTGAACCGGCCAACTTCTCCA
chr22	21867624	21867625	MAPK1	173	-	574	103	677	7	129	36	2	38	2	7	5	>MAPK1(-)_CCCGCCGGCCCGCCCGTCAG	>MAPK1(-)_CCCGCCGGCCCGCCCGTCAGTCTGGCAGGCAGGCAGGCAATCGGTCCG	>MAPK1(-)_GTCTGGCAGGCAGGCAGGCAATCGGTCCG
chr17	40443449	40443450	IGFBP4	3002	+	324	346	670	175	102	30	8	38	24	112	43	>IGFBP4(+)_AGGGACCGGTATAAAGTCCG	>IGFBP4(+)_AGGGACCGGTATAAAGTCCGGGGGAGCCGGTCCCGGGCAGCCGCTCAG	>IGFBP4(+)_GGGGGAGCCGGTCCCGGGCAGCCGCTCAG
chr6	30720356	30720357	TUBB	1453	+	200	468	668	98	103	22	16	38	27	35	19	>TUBB(+)_CTTTCCCTCCGCGCCCTCCC	>TUBB(+)_CTTTCCCTCCGCGCCCTCCCCTCTCCTTTCTCCCTCTCAGAACCTTCC	>TUBB(+)_CCTCTCCTTTCTCCCTCTCAGAACCTTCC
chr1	61725129	61725130	TM2D1	237	-	433	227	660	12	170	30	8	38	5	12	11	>TM2D1(-)_CTGGGCGGAGGCGGAAGCGG	>TM2D1(-)_CTGGGCGGAGGCGGAAGCGGAAGTGGCGAGAAAGTGTCGGTCTCCAAG	>TM2D1(-)_GAAGTGGCGAGAAAGTGTCGGTCTCCAAG
chr20	50153722	50153723	TMEM189	1532	-	415	232	647	6	155	33	5	38	2	2	1	>TMEM189(-)_CCCGCCCGCGCCGCCGCCGC	>TMEM189(-)_CCCGCCCGCGCCGCCGCCGCGCCCGGCGCTGGGCGGTCATTGGGCGGC	>TMEM189(-)_CGCCCGGCGCTGGGCGGTCATTGGGCGGC
chr20	50153722	50153723	TMEM189-UBE2V1	1532	-	415	232	647	6	155	33	5	38	2	2	1	>TMEM189-UBE2V1(-)_CCCGCCCGCGCCGCCGCCGC	>TMEM189-UBE2V1(-)_CCCGCCCGCGCCGCCGCCGCGCCCGGCGCTGGGCGGTCATTGGGCGGC	>TMEM189-UBE2V1(-)_CGCCCGGCGCTGGGCGGTCATTGGGCGGC
chr19	12957214	12957215	GADD45GIP1	278	-	497	148	645	3	295	33	5	38	12	11	15	>GADD45GIP1(-)_TGGACAGCCCGGCGGGCCTG	>GADD45GIP1(-)_TGGACAGCCCGGCGGGCCTGTGAGGACCCCGCACAGCCAAGATGGCGG	>GADD45GIP1(-)_GTGAGGACCCCGCACAGCCAAGATGGCGG
chr19	38647686	38647687	ACTN4	777	+	357	263	620	54	170	25	13	38	8	10	6	>ACTN4(+)_GAAGCAGCTGAAGCGGCGGT	>ACTN4(+)_GAAGCAGCTGAAGCGGCGGTAGCGGCGGCGGCTCGGGCAGAGGGGCGG	>ACTN4(+)_TAGCGGCGGCGGCTCGGGCAGAGGGGCGG
chr15	80989814	80989815	MESD	353	-	478	142	620	16	191	33	5	38	12	19	10	>MESD(-)_GGCGGGGTCCGGCCCGCGCA	>MESD(-)_GGCGGGGTCCGGCCCGCGCAGGTCGGGTAAGCGCGTCTAGGGCGCTGC	>MESD(-)_AGGTCGGGTAAGCGCGTCTAGGGCGCTGC
chr18	46098284	46098285	ATP5F1A	588	-	386	218	604	69	257	31	7	38	13	30	23	>ATP5F1A(-)_CTGTCTTGACCTTCTTTGCG	>ATP5F1A(-)_CTGTCTTGACCTTCTTTGCGGCTCGGCCATTTTGTCCCAGTCAGTCCG	>ATP5F1A(-)_GGCTCGGCCATTTTGTCCCAGTCAGTCCG
chr16	2513971	2513972	ATP6V0C	161	+	490	114	604	18	102	36	2	38	8	15	10	>ATP6V0C(+)_GGCCGCGGCCGCCATTTTGT	>ATP6V0C(+)_GGCCGCGGCCGCCATTTTGTTCTGCGGTGCTGGTATTTAGAGCGCAGC	>ATP6V0C(+)_TTCTGCGGTGCTGGTATTTAGAGCGCAGC
chr9	19380233	19380234	RPS6	717	-	290	312	602	583	171	23	15	38	132	9	4	>RPS6(-)_AGCGCCTATGTGACCTGCGC	>RPS6(-)_AGCGCCTATGTGACCTGCGCTAAGCGGAAGTTGGCCCTCTTTTCCGTG	>RPS6(-)_CTAAGCGGAAGTTGGCCCTCTTTTCCGTG
chr14	102363060	102363061	TECPR2	132	+	517	75	592	16	122	32	6	38	8	4	0	>TECPR2(+)_GGGAACAGGCTCCCGGCAGC	>TECPR2(+)_GGGAACAGGCTCCCGGCAGCCCCCGCGGCCCGGAGTCCATCCCGCCTC	>TECPR2(+)_CCCCCGCGGCCCGGAGTCCATCCCGCCTC
chr8	544833	544834	TDRP	492	-	356	232	588	272	149	34	4	38	88	17	13	>TDRP(-)_CCGGCCCACTGGGCCCGCGT	>TDRP(-)_CCGGCCCACTGGGCCCGCGTCCCGCAGGAGCCGCAGGCAGAGCGTCCG	>TDRP(-)_TCCCGCAGGAGCCGCAGGCAGAGCGTCCG
chr9	124869214	124869215	ARPC5L	72	+	419	169	588	14	153	35	3	38	3	12	11	>ARPC5L(+)_GCTGGGAGCAGCCGGGCAGC	>ARPC5L(+)_GCTGGGAGCAGCCGGGCAGCCGCTTCCCGCCCCCGAGCAGGAGCCGGT	>ARPC5L(+)_CCGCTTCCCGCCCCCGAGCAGGAGCCGGT
chr16	3305507	3305508	ZNF75A	44	+	485	96	581	9	245	38	0	38	4	10	8	>ZNF75A(+)_AAAGCGTCACTTCCACTTCC	>ZNF75A(+)_AAAGCGTCACTTCCACTTCCGGCCGGCGCTCTGGCTCTGTACCTGGAC	>ZNF75A(+)_CGGCCGGCGCTCTGGCTCTGTACCTGGAC
chr6	30489511	30489512	HLA-E	1909	+	390	185	575	481	163	36	2	38	57	43	11	>HLA-E(+)_CCGACTATAAAGTCCCCATC	>HLA-E(+)_CCGACTATAAAGTCCCCATCCGGACTCAAGAAGTTCTCAGGACTCAGA	>HLA-E(+)_CCGGACTCAAGAAGTTCTCAGGACTCAGA
chr1	27830813	27830814	PPP1R8	195	+	378	194	572	61	199	31	7	38	18	16	10	>PPP1R8(+)_CTCGGTCTTCCAGTTTCCCG	>PPP1R8(+)_CTCGGTCTTCCAGTTTCCCGGCGTGCTTAGGGCGCGCCAAATGGGAGG	>PPP1R8(+)_GGCGTGCTTAGGGCGCGCCAAATGGGAGG
chr1	21345503	21345504	ECE1	925	-	371	199	570	58	197	29	9	38	29	19	20	>ECE1(-)_CACTCGGCGCCGAAGCCGCG	>ECE1(-)_CACTCGGCGCCGAAGCCGCGAGCTCGCCCGCTGGAGCTGAGCGCGCCG	>ECE1(-)_GAGCTCGCCCGCTGGAGCTGAGCGCGCCG
chr5	137754356	137754357	HNRNPA0	138	-	315	246	561	98	139	31	7	38	31	47	28	>HNRNPA0(-)_GCCTCGGGGAGGGTGCGCGC	>HNRNPA0(-)_GCCTCGGGGAGGGTGCGCGCGCGTTCAGCGGCCTCTTTGTGTGGTGCC	>HNRNPA0(-)_CGCGTTCAGCGGCCTCTTTGTGTGGTGCC
chr1	16156068	16156069	EPHA2	133	-	225	306	531	148	159	26	12	38	16	35	12	>EPHA2(-)_GGCATGAATGAACAGGAGTC	>EPHA2(-)_GGCATGAATGAACAGGAGTCGGTTCTCACCCAACTTCCATTAAGGACT	>EPHA2(-)_CGGTTCTCACCCAACTTCCATTAAGGACT
chr21	26170766	26170767	APP	708	-	250	281	531	118	164	31	7	38	22	24	18	>APP(-)_CCTGGCTCTGAGCCCCGCCG	>APP(-)_CCTGGCTCTGAGCCCCGCCGCCGCGCTCGGGCTCCGTCAGTTTCCTCG	>APP(-)_GCCGCGCTCGGGCTCCGTCAGTTTCCTCG
chr12	8949651	8949652	M6PR	63	-	326	189	515	13	189	30	8	38	5	7	2	>M6PR(-)_AGCGGTTGCCCAGCGGCCTC	>M6PR(-)_AGCGGTTGCCCAGCGGCCTCTTGGCGCTTCCTGTTTCCGGTTCCCAGA	>M6PR(-)_CTTGGCGCTTCCTGTTTCCGGTTCCCAGA
chr10	84328633	84328634	CCSER2	181	+	281	227	508	14	168	29	9	38	9	6	5	>CCSER2(+)_GGGCGGGCGCCGGCCGAGGG	>CCSER2(+)_GGGCGGGCGCCGGCCGAGGGAGGGGGCGCGGCGGCTTTGGAGTCCGGC	>CCSER2(+)_GAGGGGGCGCGGCGGCTTTGGAGTCCGGC
chr1	23691805	23691806	RPL11	133	+	314	180	494	282	184	31	7	38	48	68	17	>RPL11(+)_TCCTGGCCCATAAGGCCCTC	>RPL11(+)_TCCTGGCCCATAAGGCCCTCGGCCGGAAGCTCCGCTTTCTCTTCCTGC	>RPL11(+)_CGGCCGGAAGCTCCGCTTTCTCTTCCTGC
chr10	124461842	124461843	LHPP	12	+	441	37	478	3	267	38	0	38	6	1	8	>LHPP(+)_CGCGGCGCCGGCGCCGGCGT	>LHPP(+)_CGCGGCGCCGGCGCCGGCGTCGGTTGGGACGCGGAGCTGAGGAGCAGG	>LHPP(+)_TCGGTTGGGACGCGGAGCTGAGGAGCAGG
chr7	56051764	56051765	CCT6A	158	+	345	131	476	22	160	31	7	38	2	11	2	>CCT6A(+)_GGGCACGCTGGGGGCCGGCC	>CCT6A(+)_GGGCACGCTGGGGGCCGGCCAGACGGGCCGACTTTTCCAGAAGACCCG	>CCT6A(+)_CAGACGGGCCGACTTTTCCAGAAGACCCG
chr2	223945298	223945299	WDFY1	402	-	335	129	464	37	183	34	4	38	9	7	8	>WDFY1(-)_GCGTCAGCTGATGGGCTGCC	>WDFY1(-)_GCGTCAGCTGATGGGCTGCCTGCCGAGGAGGCCGCAGCAGTCGCCGCG	>WDFY1(-)_CTGCCGAGGAGGCCGCAGCAGTCGCCGCG
chr3	72996810	72996811	PPP4R2	42	+	312	148	460	30	159	33	5	38	10	13	6	>PPP4R2(+)_GAGGACGGCGGCAGGGAGCG	>PPP4R2(+)_GAGGACGGCGGCAGGGAGCGTGCGCGCGGTGACGTACCGGGCGCCATG	>PPP4R2(+)_GTGCGCGCGGTGACGTACCGGGCGCCATG
chr3	51671257	51671258	TEX264	42	+	327	130	457	19	108	32	6	38	10	6	6	>TEX264(+)_CGCGCAGGCTCCGTAACCGA	>TEX264(+)_CGCGCAGGCTCCGTAACCGAACCCTGAGCCGCCTGCGCGGATCGGCGT	>TEX264(+)_AACCCTGAGCCGCCTGCGCGGATCGGCGT
chr8	144291403	144291404	BOP1	14	-	367	90	457	13	193	33	5	38	9	3	0	>BOP1(-)_CGTCCTCCTGCGCACGCGGC	>BOP1(-)_CGTCCTCCTGCGCACGCGGCCCGGTCGCTGTCGGAAGCGGCTGTGCGG	>BOP1(-)_CCCGGTCGCTGTCGGAAGCGGCTGTGCGG
chr2	5692385	5692386	SOX11	499	+	219	236	455	147	101	26	12	38	30	55	13	>SOX11(+)_CCTGATAACTAGTTGAGAGA	>SOX11(+)_CCTGATAACTAGTTGAGAGAGAGACCTCAACTTTTTGCAGAAGGAGCG	>SOX11(+)_AGAGACCTCAACTTTTTGCAGAAGGAGCG
chr7	107580271	107580272	BCAP29	32	+	334	86	420	17	189	35	3	38	6	1	8	>BCAP29(+)_GCGGCGTCTGACGTCCCGCG	>BCAP29(+)_GCGGCGTCTGACGTCCCGCGCGTCGGCGGCCGCGGAGCAGCGCAGGGA	>BCAP29(+)_GCGTCGGCGGCCGCGGAGCAGCGCAGGGA
chr4	52038296	52038297	SGCB	68	-	327	87	414	3	121	35	3	38	4	2	1	>SGCB(-)_CGCAGGCGCGCAGGGTGCGG	>SGCB(-)_CGCAGGCGCGCAGGGTGCGGTCGCGGAGGGGCGGGCACAGTCGGGCGG	>SGCB(-)_GTCGCGGAGGGGCGGGCACAGTCGGGCGG
chr6	53545021	53545022	GCLC	599	-	328	77	405	12	205	34	4	38	3	14	7	>GCLC(-)_GCGGCGGCGCAGGTTTTGGT	>GCLC(-)_GCGGCGGCGCAGGTTTTGGTCACAAGTAGGAAGAAGCCAGTGCACCAG	>GCLC(-)_TCACAAGTAGGAAGAAGCCAGTGCACCAG
chr3	113746240	113746241	NAA50	63	-	307	88	395	3	163	31	7	38	10	0	7	>NAA50(-)_GGCGGCGCGCCGGCGCGCGA	>NAA50(-)_GGCGGCGCGCCGGCGCGCGAGGGGCGGGGTGAAAGGTCACAGCGCGGC	>NAA50(-)_AGGGGCGGGGTGAAAGGTCACAGCGCGGC
chr22	38398876	38398877	TPTEP2-CSNK1E	170	-	200	193	393	79	128	30	8	38	14	22	21	>TPTEP2-CSNK1E(-)_GAGCGGCGGGCCGAGGGAGG	>TPTEP2-CSNK1E(-)_GAGCGGCGGGCCGAGGGAGGGCGCAGCAGCTGCTCCCTGAACACTTTC	>TPTEP2-CSNK1E(-)_GGCGCAGCAGCTGCTCCCTGAACACTTTC
chr3	52897547	52897548	STIMATE	172	-	327	58	385	18	155	37	1	38	7	5	5	>STIMATE(-)_GCGGCGCGGAGTCGGCGGCC	>STIMATE(-)_GCGGCGCGGAGTCGGCGGCCGGGCGGAGGTACCGGCTCAGGCTTGGGA	>STIMATE(-)_CGGGCGGAGGTACCGGCTCAGGCTTGGGA
chr3	52897547	52897548	STIMATE-MUSTN1	172	-	327	58	385	18	155	37	1	38	7	5	5	>STIMATE-MUSTN1(-)_GCGGCGCGGAGTCGGCGGCC	>STIMATE-MUSTN1(-)_GCGGCGCGGAGTCGGCGGCCGGGCGGAGGTACCGGCTCAGGCTTGGGA	>STIMATE-MUSTN1(-)_CGGGCGGAGGTACCGGCTCAGGCTTGGGA
chr17	51166461	51166462	NME2	37	+	323	56	379	15	119	34	4	38	1	14	9	>NME2(+)_TCCCGGGTGTGGTGGTCGCA	>NME2(+)_TCCCGGGTGTGGTGGTCGCACCAGCTCTCTGCTCTCCCAGCGCAGCGC	>NME2(+)_ACCAGCTCTCTGCTCTCCCAGCGCAGCGC
chr5	6633041	6633042	NSUN2	69	-	284	87	371	29	242	35	3	38	5	9	10	>NSUN2(-)_TGGGGCCTTGGTTTCCGGCC	>NSUN2(-)_TGGGGCCTTGGTTTCCGGCCGGAAGTCCCGGGAGGTGTAGGGCTAGAG	>NSUN2(-)_CGGAAGTCCCGGGAGGTGTAGGGCTAGAG
chr2	36966559	36966560	STRN	61	-	306	64	370	38	146	32	6	38	4	4	5	>STRN(-)_CCCGCGCCCAGGAGGCTGCT	>STRN(-)_CCCGCGCCCAGGAGGCTGCTCCCTGCTGACTGGGGTGTGGGCGGGAGC	>STRN(-)_TCCCTGCTGACTGGGGTGTGGGCGGGAGC
chr17	68512449	68512450	PRKAR1A	52	+	317	49	366	23	252	36	2	38	3	6	8	>PRKAR1A(+)_GGCCAGGCCGTTTCCGGTGG	>PRKAR1A(+)_GGCCAGGCCGTTTCCGGTGGAGCTGTCGCCTAGCCGCTATCGCAGAGT	>PRKAR1A(+)_GAGCTGTCGCCTAGCCGCTATCGCAGAGT
chr1	1273853	1273854	UBE2J2	37	-	274	79	353	12	243	30	8	38	6	5	2	>UBE2J2(-)_ACCGCCCCGGACCGCGCACC	>UBE2J2(-)_ACCGCCCCGGACCGCGCACCGGAAGCAGAAGCTAGGCTGGTTCCGCCC	>UBE2J2(-)_CGGAAGCAGAAGCTAGGCTGGTTCCGCCC
chr16	31117666	31117667	KAT8	33	+	222	112	334	15	239	29	9	38	11	1	5	>KAT8(+)_GGAGCCAAAAGAACTGCGTG	>KAT8(+)_GGAGCCAAAAGAACTGCGTGGCGTCCGATTCTGGCGTCACTTCCCTTC	>KAT8(+)_GGCGTCCGATTCTGGCGTCACTTCCCTTC
chr17	68248092	68248093	AMZ2	63	+	237	96	333	5	188	35	3	38	7	7	5	>AMZ2(+)_CGCGGTGCGCATGCGCGTGA	>AMZ2(+)_CGCGGTGCGCATGCGCGTGAGGGCTGCCGCGGGTGGGTGGTATCGAGG	>AMZ2(+)_AGGGCTGCCGCGGGTGGGTGGTATCGAGG
chr10	73811819	73811820	NDST2	242	-	158	173	331	88	159	33	5	38	8	13	2	>NDST2(-)_CCCTGCTCCGAAGTCGTGGT	>NDST2(-)_CCCTGCTCCGAAGTCGTGGTCCCCGACGCTCGGCCGGCAGTGCCATCG	>NDST2(-)_TCCCCGACGCTCGGCCGGCAGTGCCATCG
chr21	36385391	36385392	CHAF1B	25	+	278	44	322	6	163	37	1	38	3	1	3	>CHAF1B(+)_GAGGTCCCGCCCATGCGGGG	>CHAF1B(+)_GAGGTCCCGCCCATGCGGGGGCGGGGCCTGCGGCGCGCGGGAAGCGGC	>CHAF1B(+)_GGCGGGGCCTGCGGCGCGCGGGAAGCGGC
chr9	89318499	89318500	SECISBP2	128	+	264	42	306	0	221	36	2	38	1	4	1	>SECISBP2(+)_TTTGCTGTGACGCACTTCCT	>SECISBP2(+)_TTTGCTGTGACGCACTTCCTGGCGTCGCCTGCGGGGGCGGAAACGCTT	>SECISBP2(+)_TGGCGTCGCCTGCGGGGGCGGAAACGCTT
chr1	23743470	23743471	ELOA	120	+	188	113	301	11	163	27	11	38	10	5	9	>ELOA(+)_GAGGGCGGAGCTGCGGCCCG	>ELOA(+)_GAGGGCGGAGCTGCGGCCCGAGGACGCGACGCGAGCCCAGTTCCGGCG	>ELOA(+)_GAGGACGCGACGCGAGCCCAGTTCCGGCG
chr11	65712251	65712252	KAT5	103	+	210	27	237	7	250	38	0	38	6	1	2	>KAT5(+)_TCCCGGAAGTGACGTCTCCC	>KAT5(+)_TCCCGGAAGTGACGTCTCCCAGAGGGGCCGGAAGTGGCAGTGGAGGGA	>KAT5(+)_CAGAGGGGCCGGAAGTGGCAGTGGAGGGA
chr12	110450332	110450333	ARPC3	80	-	153	62	215	4	184	33	5	38	1	5	0	>ARPC3(-)_CACCCGCCCCTTCCGTTTCG	>ARPC3(-)_CACCCGCCCCTTCCGTTTCGCTTCCGCCTACCTCGCCCAGGCTGCCAG	>ARPC3(-)_GCTTCCGCCTACCTCGCCCAGGCTGCCAG
chr16	58515532	58515533	SETD6	82	+	146	30	176	0	149	34	4	38	1	3	3	>SETD6(+)_ACCGCGCGGTGCGCCGGCCC	>SETD6(+)_ACCGCGCGGTGCGCCGGCCCGCGAGGAAACGCGCTCTTAGACCATGGC	>SETD6(+)_CGCGAGGAAACGCGCTCTTAGACCATGGC
chr19	10836209	10836210	TMED1	59	-	124	48	172	53	129	37	1	38	13	8	5	>TMED1(-)_GGCAGGGCTAGCGCTTAAAG	>TMED1(-)_GGCAGGGCTAGCGCTTAAAGGAGCCGCGACCCCTTTGCAGACCAGAGG	>TMED1(-)_GGAGCCGCGACCCCTTTGCAGACCAGAGG
chr17	81035150	81035151	BAIAP2	672	+	535	398	933	512	148	28	9	37	39	353	66	>BAIAP2(+)_GCGGCTATAAAGGTGGCCGC	>BAIAP2(+)_GCGGCTATAAAGGTGGCCGCCGCCGGACGCCGGGCTCTGTGGTTCGGG	>BAIAP2(+)_CCGCCGGACGCCGGGCTCTGTGGTTCGGG
chr12	120496112	120496113	DYNLL1	4258	+	396	469	865	298	125	29	8	37	59	61	26	>DYNLL1(+)_CTGAGCACTAGGCGGCGGCG	>DYNLL1(+)_CTGAGCACTAGGCGGCGGCGGCTGGCGTGGGGCTGCTTAGATGCGCCA	>DYNLL1(+)_GGCTGGCGTGGGGCTGCTTAGATGCGCCA
chr22	41446796	41446797	TOB2	615	-	445	416	861	259	113	29	8	37	56	65	21	>TOB2(-)_AGGGTTGCTAAGGGTGAAAC	>TOB2(-)_AGGGTTGCTAAGGGTGAAACTTTTCATTGACTTTGCTCACTTCGGGCC	>TOB2(-)_CTTTTCATTGACTTTGCTCACTTCGGGCC
chr16	4624866	4624867	MGRN1	67	+	670	126	796	8	159	35	2	37	0	8	5	>MGRN1(+)_GGCTCGAGGCGCCTCCGCGG	>MGRN1(+)_GGCTCGAGGCGCCTCCGCGGCCGTGGACGAGCGTCCGTGCGGCCTGGT	>MGRN1(+)_GCCGTGGACGAGCGTCCGTGCGGCCTGGT
chr12	76031594	76031595	PHLDA1	260	-	111	673	784	414	105	14	23	37	63	15	8	>PHLDA1(-)_TGGCCCATTCAAAAGCGCCG	>PHLDA1(-)_TGGCCCATTCAAAAGCGCCGCGAGGGGGCCCGGCCAGTGCCCTTCAGT	>PHLDA1(-)_GCGAGGGGGCCCGGCCAGTGCCCTTCAGT
chr19	1269336	1269337	CIRBP	213	+	211	545	756	425	47	20	17	37	29	92	8	>CIRBP(+)_CGTATATAAGGCCGGGCTCG	>CIRBP(+)_CGTATATAAGGCCGGGCTCGGGGACGCCCCCCCCTCACTCGCGCGTTA	>CIRBP(+)_GGGGACGCCCCCCCCTCACTCGCGCGTTA
chr2	70190716	70190717	C2orf42	337	-	586	151	737	21	172	35	2	37	6	18	14	>C2orf42(-)_CGGGAAGCAGGTCCCAGGGG	>C2orf42(-)_CGGGAAGCAGGTCCCAGGGGATATGTGTGTGTCGCTGCAGACCCATCC	>C2orf42(-)_GATATGTGTGTGTCGCTGCAGACCCATCC
chr2	74198614	74198615	MTHFD2	157	+	424	304	728	271	142	29	8	37	31	50	14	>MTHFD2(+)_GGCCGCAGTATAACCGCGTG	>MTHFD2(+)_GGCCGCAGTATAACCGCGTGGCCCGCGCGCGCGCTTCCCTCCCGGCGC	>MTHFD2(+)_GGCCCGCGCGCGCGCTTCCCTCCCGGCGC
chr14	21269423	21269424	HNRNPC	335	-	477	226	703	121	166	36	1	37	16	102	32	>HNRNPC(-)_TAGGCCTTCGCCTCGGCGGC	>HNRNPC(-)_TAGGCCTTCGCCTCGGCGGCAGAGGAGACTCGGGGGCCATTTTGTGAA	>HNRNPC(-)_CAGAGGAGACTCGGGGGCCATTTTGTGAA
chr3	170870194	170870195	RPL22L1	517	-	181	467	648	500	125	18	19	37	52	29	7	>RPL22L1(-)_CGCTTTGATATAAATGCAGA	>RPL22L1(-)_CGCTTTGATATAAATGCAGACCGCGCGGCCGTAGCTTCCTCTCTGCTC	>RPL22L1(-)_ACCGCGCGGCCGTAGCTTCCTCTCTGCTC
chr6	34426068	34426069	RPS10	339	-	237	390	627	131	127	23	14	37	21	52	45	>RPS10(-)_GCCAGCCCGGAAGAGACGCA	>RPS10(-)_GCCAGCCCGGAAGAGACGCAGCACCGCGCATGCTCCTTCCTTTCCAGC	>RPS10(-)_AGCACCGCGCATGCTCCTTCCTTTCCAGC
chr6	34426068	34426069	RPS10-NUDT3	339	-	237	390	627	131	127	23	14	37	21	52	45	>RPS10-NUDT3(-)_GCCAGCCCGGAAGAGACGCA	>RPS10-NUDT3(-)_GCCAGCCCGGAAGAGACGCAGCACCGCGCATGCTCCTTCCTTTCCAGC	>RPS10-NUDT3(-)_AGCACCGCGCATGCTCCTTCCTTTCCAGC
chr5	160400053	160400054	ZBED8	268	-	412	203	615	5	189	32	5	37	3	8	3	>ZBED8(-)_GGAGACGCCTCTCCCAGTTT	>ZBED8(-)_GGAGACGCCTCTCCCAGTTTGCGGGCGGGAAGCACCCTGGAGAACCCG	>ZBED8(-)_TGCGGGCGGGAAGCACCCTGGAGAACCCG
chr7	99374729	99374730	ARPC1B	1037	+	315	290	605	84	119	30	7	37	27	26	13	>ARPC1B(+)_GCCCACGAGGAAGTGGCTGC	>ARPC1B(+)_GCCCACGAGGAAGTGGCTGCTGCTCCGGCGCGGAGCCCAGAGCCGGTT	>ARPC1B(+)_CTGCTCCGGCGCGGAGCCCAGAGCCGGTT
chr1	161177500	161177501	B4GALT3	152	-	512	93	605	5	179	32	5	37	4	0	5	>B4GALT3(-)_CCGAGGCCCCGCCCCATGAC	>B4GALT3(-)_CCGAGGCCCCGCCCCATGACGCGAGACCCCGCCCCCGCAGCGCCCGCT	>B4GALT3(-)_CGCGAGACCCCGCCCCCGCAGCGCCCGCT
chr3	52278645	52278646	WDR82	185	-	435	166	601	16	223	34	3	37	8	26	18	>WDR82(-)_TTTCCCGGCGTGCGCCGCGG	>WDR82(-)_TTTCCCGGCGTGCGCCGCGGCTGAGGCTCCTCGCCCTCAGCTTCTGCC	>WDR82(-)_GCTGAGGCTCCTCGCCCTCAGCTTCTGCC
chr19	16829397	16829398	SIN3B	190	+	467	134	601	2	132	31	6	37	2	2	4	>SIN3B(+)_CTGCGCATGCGCGGCAGGAC	>SIN3B(+)_CTGCGCATGCGCGGCAGGACCTCGGGCGGGGGCGGGGCGGGGCGCAGC	>SIN3B(+)_CCTCGGGCGGGGGCGGGGCGGGGCGCAGC
chr3	10248496	10248497	TATDN2	94	+	503	88	591	19	144	34	3	37	9	12	5	>TATDN2(+)_GTCGCTCTCCGGCCTGCGGG	>TATDN2(+)_GTCGCTCTCCGGCCTGCGGGCCGCAGGGCTCGTTCCGGAGGGCGGGCG	>TATDN2(+)_GCCGCAGGGCTCGTTCCGGAGGGCGGGCG
chr19	41860256	41860257	RPS19	151	+	297	284	581	103	93	28	9	37	27	17	12	>RPS19(+)_TACGCCCGACTTGTGCGCCC	>RPS19(+)_TACGCCCGACTTGTGCGCCCGGGAAACCCCGTCGTTCCCTTTCCCCTG	>RPS19(+)_CGGGAAACCCCGTCGTTCCCTTTCCCCTG
chr2	200864657	200864658	CLK1	797	-	253	318	571	203	153	29	8	37	41	122	35	>CLK1(-)_TTTTCGAGACGAGTCTCGAC	>CLK1(-)_TTTTCGAGACGAGTCTCGACGCAGCAGCTGTCAGCTCCATTTTGTTGT	>CLK1(-)_CGCAGCAGCTGTCAGCTCCATTTTGTTGT
chr3	157160146	157160147	CCNL1	2097	-	207	359	566	335	162	15	22	37	73	14	9	>CCNL1(-)_CGGTCACGGGAATATCCGTC	>CCNL1(-)_CGGTCACGGGAATATCCGTCGCGCCGAGAACGCTGGTTAGTCTTGTTT	>CCNL1(-)_CGCGCCGAGAACGCTGGTTAGTCTTGTTT
chr9	133356477	133356478	SURF1	153	-	417	128	545	2	176	33	4	37	5	1	0	>SURF1(-)_CTCAGCGGCGCCCCGGATGC	>SURF1(-)_CTCAGCGGCGCCCCGGATGCAGATGCTTCCTGCGTCCCGGAAGCGCCC	>SURF1(-)_CAGATGCTTCCTGCGTCCCGGAAGCGCCC
chr1	44775573	44775574	RPS8	530	+	292	249	541	130	140	26	11	37	32	23	7	>RPS8(+)_CAGCGTTTTACAAACCGAAC	>RPS8(+)_CAGCGTTTTACAAACCGAACCGTGAATCTTTGCGGTTTCTCTTTCCAG	>RPS8(+)_CCGTGAATCTTTGCGGTTTCTCTTTCCAG
chr22	41621026	41621027	DESI1	36	-	392	144	536	102	155	34	3	37	22	105	48	>DESI1(-)_CCGTGTGGGCCCTCCCTGTC	>DESI1(-)_CCGTGTGGGCCCTCCCTGTCCCCTCTCTGTCACCTCACAGTAGTCGTT	>DESI1(-)_CCCCTCTCTGTCACCTCACAGTAGTCGTT
chr1	42767295	42767296	C1orf50	98	+	320	207	527	40	195	30	7	37	13	7	5	>C1orf50(+)_CGCAGGCTCTTCCTACTCGC	>C1orf50(+)_CGCAGGCTCTTCCTACTCGCACAGCCCAGGGAGTGGGGAGGATAAGGC	>C1orf50(+)_CACAGCCCAGGGAGTGGGGAGGATAAGGC
chr5	131264101	131264102	CDC42SE2	278	+	434	75	509	37	168	37	0	37	10	9	3	>CDC42SE2(+)_AGCGCGCTGGGGAGCGCAGC	>CDC42SE2(+)_AGCGCGCTGGGGAGCGCAGCTGCAGGCGTTGGGGCGGCAGGAGCCGCG	>CDC42SE2(+)_CTGCAGGCGTTGGGGCGGCAGGAGCCGCG
chr2	231708529	231708530	PTMA	141	+	146	361	507	726	90	22	15	37	49	7	4	>PTMA(+)_AATCTATATTAAAGCTTCTG	>PTMA(+)_AATCTATATTAAAGCTTCTGGCGCCGCGTGAGTCCCCCACTGGCTGCT	>PTMA(+)_GGCGCCGCGTGAGTCCCCCACTGGCTGCT
chr7	23299340	23299341	MALSU1	38	+	372	134	506	71	203	34	3	37	8	25	6	>MALSU1(+)_GGGCTCCATGAAGTACCACC	>MALSU1(+)_GGGCTCCATGAAGTACCACCCACCCGCGACGCCGACGCAAGGCTGCTG	>MALSU1(+)_CCACCCGCGACGCCGACGCAAGGCTGCTG
chrX	136880721	136880722	RBMX	507	-	253	247	500	163	76	31	6	37	26	23	13	>RBMX(-)_GGGCAGTATAAAGTTTGCTG	>RBMX(-)_GGGCAGTATAAAGTTTGCTGTCTCCTTTGTTCGCCCTCGTTGCGCAGT	>RBMX(-)_GTCTCCTTTGTTCGCCCTCGTTGCGCAGT
chr10	104254900	104254901	GSTO1	366	+	224	273	497	54	118	27	10	37	13	15	10	>GSTO1(+)_GGACGCGCCACCTACTTCCT	>GSTO1(+)_GGACGCGCCACCTACTTCCTGAATCCCCTGCAAACCCCAGAGGAGCTC	>GSTO1(+)_TGAATCCCCTGCAAACCCCAGAGGAGCTC
chr21	36070023	36070024	CBR1	743	+	320	160	480	29	94	32	5	37	9	6	3	>CBR1(+)_CCGGGCGTGTAACCCACGGG	>CBR1(+)_CCGGGCGTGTAACCCACGGGTGCGCGCCCACGACCGCCAGACTCGAGC	>CBR1(+)_GTGCGCGCCCACGACCGCCAGACTCGAGC
chr20	34112213	34112214	EIF2S2	246	-	302	177	479	47	135	34	3	37	7	7	9	>EIF2S2(-)_GGGCGGGGTGTCGTTTCCTT	>EIF2S2(-)_GGGCGGGGTGTCGTTTCCTTTCGCTGATGCAAGAGCCTAGTGCGGTGG	>EIF2S2(-)_TTCGCTGATGCAAGAGCCTAGTGCGGTGG
chr17	28645147	28645148	KIAA0100	292	-	395	84	479	18	136	28	9	37	8	1	2	>KIAA0100(-)_ACCAGCGCGTCCTCGCTCAG	>KIAA0100(-)_ACCAGCGCGTCCTCGCTCAGCGTTGCTCCTGCGCGCGCAGCTGGTCGG	>KIAA0100(-)_GCGTTGCTCCTGCGCGCGCAGCTGGTCGG
chr16	5071842	5071843	ALG1	64	+	349	125	474	8	201	29	8	37	3	4	5	>ALG1(+)_CAGCGCGAGGAAGCGCGGTC	>ALG1(+)_CAGCGCGAGGAAGCGCGGTCACGTGACTGCTGCGGGCCAGCCAAGATG	>ALG1(+)_CACGTGACTGCTGCGGGCCAGCCAAGATG
chr5	218319	218320	SDHA	117	+	338	132	470	54	143	34	3	37	19	11	19	>SDHA(+)_AGCTCGACCCCGGTGTGGTG	>SDHA(+)_AGCTCGACCCCGGTGTGGTGCGCAGGCGCAGTCTGCGCAGGGACTGGC	>SDHA(+)_GCGCAGGCGCAGTCTGCGCAGGGACTGGC
chr17	3846245	3846246	NCBP3	621	-	360	101	461	40	187	35	2	37	25	9	8	>NCBP3(-)_GCGGCGCTCTAGCCGGCGGC	>NCBP3(-)_GCGGCGCTCTAGCCGGCGGCCGTGAGGGGCGGGCTCTCAGTGGTGCGG	>NCBP3(-)_CCGTGAGGGGCGGGCTCTCAGTGGTGCGG
chr13	48037725	48037726	NUDT15	30	+	407	50	457	17	213	36	1	37	3	3	0	>NUDT15(+)_GGGACGGGGTAGTGAGCGCG	>NUDT15(+)_GGGACGGGGTAGTGAGCGCGTCACTTCCTGCCGCTGCCAGGCGCGTCC	>NUDT15(+)_GTCACTTCCTGCCGCTGCCAGGCGCGTCC
chr1	58700061	58700062	MYSM1	58	-	240	189	429	21	162	30	7	37	6	1	1	>MYSM1(-)_TTCGTCTCGCGGGATCTCTC	>MYSM1(-)_TTCGTCTCGCGGGATCTCTCGGGAGGACGGACGGGGTCAGGTCCCATC	>MYSM1(-)_CGGGAGGACGGACGGGGTCAGGTCCCATC
chr16	88706381	88706382	RNF166	72	-	341	88	429	7	172	35	2	37	3	5	4	>RNF166(-)_TACGATGACGTCAGCGCGGC	>RNF166(-)_TACGATGACGTCAGCGCGGCGCAGTAGCGGCTGTGACTAGCGGGCCGG	>RNF166(-)_CGCAGTAGCGGCTGTGACTAGCGGGCCGG
chr2	218292514	218292515	TMBIM1	84	-	303	125	428	35	207	33	4	37	12	13	9	>TMBIM1(-)_GCGGAGCCCCAGCCGAGCCT	>TMBIM1(-)_GCGGAGCCCCAGCCGAGCCTAGCCCTGCCCGGCCCCGGAGGACTTGCA	>TMBIM1(-)_TAGCCCTGCCCGGCCCCGGAGGACTTGCA
chr6	13615334	13615335	NOL7	58	+	331	84	415	16	216	34	3	37	4	5	9	>NOL7(+)_CTTGCGCTCCGCTTGTAGCT	>NOL7(+)_CTTGCGCTCCGCTTGTAGCTGCTTCCGGGTCAGAGGTCAGACGGTCTA	>NOL7(+)_TGCTTCCGGGTCAGAGGTCAGACGGTCTA
chr1	51878726	51878727	NRDC	149	-	290	124	414	71	158	30	7	37	12	34	31	>NRDC(-)_AAGTCGGCGAGAGGGAGACT	>NRDC(-)_AAGTCGGCGAGAGGGAGACTGGGTTGGGGGAGGGGTTCAGGCCTGTTC	>NRDC(-)_TGGGTTGGGGGAGGGGTTCAGGCCTGTTC
chr1	167553761	167553762	CREG1	42	-	290	123	413	24	208	34	3	37	7	38	22	>CREG1(-)_GAGCTCCGGCTGGGTCCCTG	>CREG1(-)_GAGCTCCGGCTGGGTCCCTGCAGGTCTTGGGGCCCGGGACTCTTCCTG	>CREG1(-)_GCAGGTCTTGGGGCCCGGGACTCTTCCTG
chr5	56952104	56952105	MIER3	64	-	342	45	387	17	259	36	1	37	10	18	14	>MIER3(-)_GACTGGGCTCGGCGCTGCTC	>MIER3(-)_GACTGGGCTCGGCGCTGCTCGTTCGCCCTAAAGGTACCAATATGGCGG	>MIER3(-)_CGTTCGCCCTAAAGGTACCAATATGGCGG
chr19	40799226	40799227	EGLN2	79	+	296	76	372	96	98	33	4	37	18	9	14	>EGLN2(+)_GCGGGGTATGGCGCGCTGTG	>EGLN2(+)_GCGGGGTATGGCGCGCTGTGCGGCGCAGGGCGGCTGGCACAAACGGCG	>EGLN2(+)_GCGGCGCAGGGCGGCTGGCACAAACGGCG
chr14	20461433	20461434	PIP4P1	183	-	239	133	372	40	144	34	3	37	7	17	31	>PIP4P1(-)_TTGCGGAGTGAGCTGGGCGC	>PIP4P1(-)_TTGCGGAGTGAGCTGGGCGCGCGGCGCGCAGGCGCCCTGGGGACCCGG	>PIP4P1(-)_CGCGGCGCGCAGGCGCCCTGGGGACCCGG
chr19	58381029	58381030	ZNF837	347	-	331	26	357	40	96	36	1	37	10	26	14	>ZNF837(-)_CGGGTTCCCGCCTGCGCTTG	>ZNF837(-)_CGGGTTCCCGCCTGCGCTTGCTGTGGCCCGGGTCCCTCAGTGCCGCGG	>ZNF837(-)_GCTGTGGCCCGGGTCCCTCAGTGCCGCGG
chr19	46850810	46850811	AP2S1	397	-	268	71	339	86	147	35	2	37	14	86	38	>AP2S1(-)_TCTGGGCCCTACAACTGCAC	>AP2S1(-)_TCTGGGCCCTACAACTGCACCCTGAGCCGGAGCTGCCCAGTCGCCGCG	>AP2S1(-)_CCCTGAGCCGGAGCTGCCCAGTCGCCGCG
chr7	6826194	6826195	CCZ1B	86	-	292	25	317	2	109	35	2	37	3	2	1	>CCZ1B(-)_GCCGTGGGAGGCTCCCGAGG	>CCZ1B(-)_GCCGTGGGAGGCTCCCGAGGTGGGGGCCGGGGCGGGATGGCTGCAGCG	>CCZ1B(-)_GTGGGGGCCGGGGCGGGATGGCTGCAGCG
chr13	36999326	36999327	ALG5	105	-	254	61	315	6	165	35	2	37	13	7	5	>ALG5(-)_GTCGCGCGGGCGCGCTTCCG	>ALG5(-)_GTCGCGCGGGCGCGCTTCCGCCTGTGTGGAGGTGCGGGATTGGGCGGG	>ALG5(-)_GCCTGTGTGGAGGTGCGGGATTGGGCGGG
chr16	67192166	67192167	E2F4	33	+	273	40	313	5	179	35	2	37	8	5	3	>E2F4(+)_ACGCTGGCTCCGGCTGCCCG	>E2F4(+)_ACGCTGGCTCCGGCTGCCCGGCGGCCAGGAACGGAAGCGGAAGTGGCG	>E2F4(+)_GGCGGCCAGGAACGGAAGCGGAAGTGGCG
chr3	50321472	50321473	HYAL2	290	-	244	68	312	109	214	34	3	37	21	42	9	>HYAL2(-)_TGGAGTCTTAAAGGGCCAGC	>HYAL2(-)_TGGAGTCTTAAAGGGCCAGCGTGCCTGGGGGCGGAGCCAGCAGAGGCG	>HYAL2(-)_CGTGCCTGGGGGCGGAGCCAGCAGAGGCG
chr8	22604756	22604757	CCAR2	36	+	212	51	263	32	248	31	6	37	9	7	4	>CCAR2(+)_GGAGAGCGGCAGCTTCCGAC	>CCAR2(+)_GGAGAGCGGCAGCTTCCGACCAGTGGTCGCGCTTCCGGAGAGGCGCTT	>CCAR2(+)_CCAGTGGTCGCGCTTCCGGAGAGGCGCTT
chr17	38730358	38730359	CISD3	22	+	183	64	247	5	160	35	2	37	2	0	2	>CISD3(+)_GGCGGAGCCAGCGGGCGGGC	>CISD3(+)_GGCGGAGCCAGCGGGCGGGCGCGGCGCGGGAGGCGACCATGCGCGGCG	>CISD3(+)_CGCGGCGCGGGAGGCGACCATGCGCGGCG
chr1	156213006	156213007	PMF1	130	+	182	43	225	4	220	33	4	37	3	4	4	>PMF1(+)_GCAGGCGGGGAGGCCGGGCC	>PMF1(+)_GCAGGCGGGGAGGCCGGGCCAGTTAGATTTGGAGGTTCAACTTCAACA	>PMF1(+)_CAGTTAGATTTGGAGGTTCAACTTCAACA
chr1	156213006	156213007	PMF1-BGLAP	130	+	182	43	225	4	220	33	4	37	3	4	4	>PMF1-BGLAP(+)_GCAGGCGGGGAGGCCGGGCC	>PMF1-BGLAP(+)_GCAGGCGGGGAGGCCGGGCCAGTTAGATTTGGAGGTTCAACTTCAACA	>PMF1-BGLAP(+)_CAGTTAGATTTGGAGGTTCAACTTCAACA
chr15	41828164	41828165	JMJD7	58	+	82	21	103	14	124	36	1	37	1	1	2	>JMJD7(+)_GGCGGAGGCGGCTTTGGAAG	>JMJD7(+)_GGCGGAGGCGGCTTTGGAAGCCGTGCGGAGCGAGTTACGAGAATTCCC	>JMJD7(+)_GCCGTGCGGAGCGAGTTACGAGAATTCCC
chr15	41828164	41828165	JMJD7-PLA2G4B	58	+	82	21	103	14	124	36	1	37	1	1	2	>JMJD7-PLA2G4B(+)_GGCGGAGGCGGCTTTGGAAG	>JMJD7-PLA2G4B(+)_GGCGGAGGCGGCTTTGGAAGCCGTGCGGAGCGAGTTACGAGAATTCCC	>JMJD7-PLA2G4B(+)_GCCGTGCGGAGCGAGTTACGAGAATTCCC
chr19	2051242	2051243	MKNK2	448	-	199	936	1135	498	71	9	27	36	45	22	0	>MKNK2(-)_TCCGGGCCTATAAAGGTGGC	>MKNK2(-)_TCCGGGCCTATAAAGGTGGCGGCGGCGGCGACGCGCCCGGCTCCTCTC	>MKNK2(-)_CGGCGGCGGCGACGCGCCCGGCTCCTCTC
chr1	45521883	45521884	PRDX1	265	-	297	606	903	810	116	13	23	36	89	153	47	>PRDX1(-)_CTACTGGCTATAAAGGCAGC	>PRDX1(-)_CTACTGGCTATAAAGGCAGCGCCCCGGAGAGCTCTTGCGCGTCTTGTT	>PRDX1(-)_CGCCCCGGAGAGCTCTTGCGCGTCTTGTT
chr2	8682055	8682056	ID2	4116	+	154	734	888	766	75	17	19	36	82	32	6	>ID2(+)_GAGTGCGGATAAAAGCCGCC	>ID2(+)_GAGTGCGGATAAAAGCCGCCCCGCCGGGCTCGGGCTTCATTCTGAGCC	>ID2(+)_CCCGCCGGGCTCGGGCTTCATTCTGAGCC
chr17	81860534	81860535	P4HB	276	-	470	333	803	513	146	31	5	36	55	154	40	>P4HB(-)_ACCCAGGATTTATAAAGGCG	>P4HB(-)_ACCCAGGATTTATAAAGGCGAGGCCGGGACCGGCGCGCGCTCTCGTCG	>P4HB(-)_GAGGCCGGGACCGGCGCGCGCTCTCGTCG
chr20	40689235	40689236	MAFB	260	-	342	442	784	486	107	18	18	36	54	64	12	>MAFB(-)_AGGAGGCGATAAAAGGCTGC	>MAFB(-)_AGGAGGCGATAAAAGGCTGCGGCGCCGCCGGATCCAGCACAGCTGCAC	>MAFB(-)_CGGCGCCGCCGGATCCAGCACAGCTGCAC
chr15	90102467	90102468	IDH2	409	-	480	262	742	48	132	24	12	36	28	11	14	>IDH2(-)_TGGTGCCCGCGCGGCCAGCG	>IDH2(-)_TGGTGCCCGCGCGGCCAGCGCCCGCCAGGCCCAGCGTTAGCCCGCGGC	>IDH2(-)_GCCCGCCAGGCCCAGCGTTAGCCCGCGGC
chr2	127858123	127858124	POLR2D	189	-	528	170	698	13	198	32	4	36	10	5	8	>POLR2D(-)_GGCCGTTGCTCCGCGCTTCT	>POLR2D(-)_GGCCGTTGCTCCGCGCTTCTGCTTCCGGCGGCGCTGGTGGTGGCGCGC	>POLR2D(-)_TGCTTCCGGCGGCGCTGGTGGTGGCGCGC
chr10	130110802	130110803	C10orf143	9	-	600	41	641	5	228	35	1	36	2	2	4	>C10orf143(-)_CGGAAGGGGGCGTGGTGCGC	>C10orf143(-)_CGGAAGGGGGCGTGGTGCGCGGGCCTCGGCCAGGCCTGAGATGCCGGG	>C10orf143(-)_CGGGCCTCGGCCAGGCCTGAGATGCCGGG
chr20	51023100	51023101	KCNG1	28	-	482	138	620	18	184	32	4	36	8	14	9	>KCNG1(-)_TCCCTCGGCGGCTGCTGCGC	>KCNG1(-)_TCCCTCGGCGGCTGCTGCGCCGCGCTCCCGGCGCACTCGGAGCCCGGC	>KCNG1(-)_CCGCGCTCCCGGCGCACTCGGAGCCCGGC
chr1	28506043	28506044	RCC1	848	+	141	478	619	585	66	19	17	36	63	82	21	>RCC1(+)_CGTAAGGTTTAAAAAGGATG	>RCC1(+)_CGTAAGGTTTAAAAAGGATGCTTCGCGTTTTCTCTCTCCTTTTTGGAG	>RCC1(+)_GCTTCGCGTTTTCTCTCTCCTTTTTGGAG
chr12	57520510	57520511	DDIT3	547	-	394	204	598	249	93	32	4	36	13	23	6	>DDIT3(-)_GCCATGGTAAAAGATTACAG	>DDIT3(-)_GCCATGGTAAAAGATTACAGCCAGGCGCTCCCGAGGTCAGAGACTTAA	>DDIT3(-)_GCCAGGCGCTCCCGAGGTCAGAGACTTAA
chr6	31357178	31357179	HLA-B	356	-	252	344	596	88	77	21	15	36	12	14	11	>HLA-B(-)_GTCCCAGTTCTAAAGTCCCC	>HLA-B(-)_GTCCCAGTTCTAAAGTCCCCACGCACCCACCCGGACTCAGAGTCTCCT	>HLA-B(-)_CACGCACCCACCCGGACTCAGAGTCTCCT
chr17	45317016	45317017	MAP3K14	351	-	361	224	585	52	191	28	8	36	13	20	10	>MAP3K14(-)_ACGGGCCGGGAGCTCAGCGG	>MAP3K14(-)_ACGGGCCGGGAGCTCAGCGGTCGGCGGCCGGCGGCGGGAGATCGCGGG	>MAP3K14(-)_GTCGGCGGCCGGCGGCGGGAGATCGCGGG
chr11	76860923	76860924	ACER3	52	+	376	207	583	5	175	33	3	36	4	29	17	>ACER3(+)_GCGAGCGCGCGGGCTGGGCC	>ACER3(+)_GCGAGCGCGCGGGCTGGGCCGGAGCCGGCCTGGTCGCCAGCCTAACCC	>ACER3(+)_CGGAGCCGGCCTGGTCGCCAGCCTAACCC
chr17	46923159	46923160	GOSR2	303	+	481	91	572	20	202	29	7	36	16	15	12	>GOSR2(+)_CCGGAAGGGGGGCTGTGAGG	>GOSR2(+)_CCGGAAGGGGGGCTGTGAGGACGTGTTCCGAGGAAGCCAGAGCCGGAG	>GOSR2(+)_GACGTGTTCCGAGGAAGCCAGAGCCGGAG
chr17	5419661	5419662	NUP88	1354	-	367	180	547	22	181	33	3	36	9	19	16	>NUP88(-)_TGCTCAGCGGCGGGCTGAGC	>NUP88(-)_TGCTCAGCGGCGGGCTGAGCAACTGGAGTGAGGGGAGCAGTTGGGCCA	>NUP88(-)_CAACTGGAGTGAGGGGAGCAGTTGGGCCA
chr11	14359174	14359175	RRAS2	456	-	333	213	546	8	204	34	2	36	11	5	6	>RRAS2(-)_GCAGCACCTCAGCCTGGCAG	>RRAS2(-)_GCAGCACCTCAGCCTGGCAGCCCGGCCCCCAGACGGCCATTTGTGGCG	>RRAS2(-)_GCCCGGCCCCCAGACGGCCATTTGTGGCG
chr3	185938013	185938014	TRA2B	981	-	274	268	542	27	77	24	12	36	4	13	8	>TRA2B(-)_GCCTGGCTAAGGAGCGCCGC	>TRA2B(-)_GCCTGGCTAAGGAGCGCCGCGTCACATCCGGTAGAGTTAGAGCCCGTG	>TRA2B(-)_CGTCACATCCGGTAGAGTTAGAGCCCGTG
chr6	162727765	162727766	PRKN	110	-	445	92	537	5	169	33	3	36	4	3	5	>PRKN(-)_GCATTCCTAGGGCCGGGCGC	>PRKN(-)_GCATTCCTAGGGCCGGGCGCGGGGGCGGGGAGGCCTGGAGGATTTAAC	>PRKN(-)_CGGGGGCGGGGAGGCCTGGAGGATTTAAC
chr17	75904881	75904882	MRPL38	62	-	434	101	535	19	189	31	5	36	7	6	20	>MRPL38(-)_GCCCGGGTCCTAGTGGCGGC	>MRPL38(-)_GCCCGGGTCCTAGTGGCGGCCGCAGTGTCGCAGGCCGGAGGGAAGATG	>MRPL38(-)_CCGCAGTGTCGCAGGCCGGAGGGAAGATG
chr17	42121345	42121346	KAT2A	113	-	416	119	535	0	107	32	4	36	3	0	3	>KAT2A(-)_ACGCCTGCGCACTGAGCGCT	>KAT2A(-)_ACGCCTGCGCACTGAGCGCTGGTTGCCCATGCGGCCCTAGGGCTGGGA	>KAT2A(-)_TGGTTGCCCATGCGGCCCTAGGGCTGGGA
chr9	128724124	128724125	ZDHHC12	34	-	459	74	533	46	196	31	5	36	28	2	5	>ZDHHC12(-)_CGGCGTTCCCCTCCCTCGGA	>ZDHHC12(-)_CGGCGTTCCCCTCCCTCGGAGGGCCCGCCCCTCTGGGCGCTTCTTCCG	>ZDHHC12(-)_AGGGCCCGCCCCTCTGGGCGCTTCTTCCG
chr16	88856942	88856943	GALNS	168	-	471	47	518	10	175	34	2	36	4	5	2	>GALNS(-)_GTCACGTGGCCGTCCAGGCC	>GALNS(-)_GTCACGTGGCCGTCCAGGCCCCGCCCCGCAGCCCAGCCGGAAGGGCCG	>GALNS(-)_CCCGCCCCGCAGCCCAGCCGGAAGGGCCG
chr9	134641806	134641807	COL5A1	268	+	274	240	514	121	153	29	7	36	22	14	5	>COL5A1(+)_AAGGGGGAAAAAAGTGCTCC	>COL5A1(+)_AAGGGGGAAAAAAGTGCTCCGCGCCGAAGGCGAGGTCCGCACTCTCCG	>COL5A1(+)_CGCGCCGAAGGCGAGGTCCGCACTCTCCG
chr1	6580000	6580001	ZBTB48	89	+	443	68	511	14	179	35	1	36	8	1	2	>ZBTB48(+)_CTACGCTTCCGAGGCGCACC	>ZBTB48(+)_CTACGCTTCCGAGGCGCACCTCCTGGCCTGCACGCTTTGACGTCACGT	>ZBTB48(+)_CTCCTGGCCTGCACGCTTTGACGTCACGT
chr1	45584044	45584045	NASP	573	+	331	176	507	346	139	27	9	36	14	62	6	>NASP(+)_CCTCGTATATAAAAGGGCCC	>NASP(+)_CCTCGTATATAAAAGGGCCCCGGCCGCGCGGGGTCTCTAATCTGCCAT	>NASP(+)_CCGGCCGCGCGGGGTCTCTAATCTGCCAT
chr12	125065442	125065443	AACS	121	+	327	157	484	57	171	32	4	36	10	16	13	>AACS(+)_GCGGCCCGCAGGAGGCGGCG	>AACS(+)_GCGGCCCGCAGGAGGCGGCGGCGGCCGTTCAGTCCCTTGTTCCCCGCC	>AACS(+)_GGCGGCCGTTCAGTCCCTTGTTCCCCGCC
chr8	132775387	132775388	PHF20L1	283	+	363	119	482	10	173	31	5	36	11	5	6	>PHF20L1(+)_CGCGGGCGGCTGACGTCGCC	>PHF20L1(+)_CGCGGGCGGCTGACGTCGCCGGGGCCCGGCGTCGCGTCAGGGCTGGCC	>PHF20L1(+)_CGGGGCCCGGCGTCGCGTCAGGGCTGGCC
chr11	65890673	65890674	CCDC85B	307	+	209	272	481	53	66	26	10	36	8	22	4	>CCDC85B(+)_CAGCCCGGGTAGCTGCTGCA	>CCDC85B(+)_CAGCCCGGGTAGCTGCTGCAGCCTACGCTGCCTCGGCCACTGCCTGCC	>CCDC85B(+)_AGCCTACGCTGCCTCGGCCACTGCCTGCC
chr2	233566757	233566758	USP40	72	-	314	164	478	42	197	31	5	36	15	10	11	>USP40(-)_ACGATCCATAAATCACTTTC	>USP40(-)_ACGATCCATAAATCACTTTCTGGAGACCCGCCCTCGCCAACATGGCGG	>USP40(-)_CTGGAGACCCGCCCTCGCCAACATGGCGG
chr1	206612444	206612445	EIF2D	34	-	333	138	471	13	206	33	3	36	8	4	3	>EIF2D(-)_CCTGGTTTCCAGCCGGGCCC	>EIF2D(-)_CCTGGTTTCCAGCCGGGCCCTTTTCGCGGCCGGGCCCCAGCATGGCTG	>EIF2D(-)_CTTTTCGCGGCCGGGCCCCAGCATGGCTG
chr22	38202086	38202087	MAFF	260	+	209	253	462	372	131	24	12	36	75	44	23	>MAFF(+)_GCCCCACAACAAAACTCAGC	>MAFF(+)_GCCCCACAACAAAACTCAGCGCAGCGCTCCCGGGCGCCCGGTTCAGAG	>MAFF(+)_CGCAGCGCTCCCGGGCGCCCGGTTCAGAG
chr8	98045544	98045545	RPL30	90	-	234	225	459	120	192	28	8	36	20	18	12	>RPL30(-)_GCTCTGCCGTGAAGAGCTTT	>RPL30(-)_GCTCTGCCGTGAAGAGCTTTGCATTGTGGGAAGTCTTTCCTTTCTCGT	>RPL30(-)_TGCATTGTGGGAAGTCTTTCCTTTCTCGT
chr7	151080804	151080805	FASTK	75	-	342	115	457	72	223	32	4	36	19	7	5	>FASTK(-)_CGATAGCTGCTTCGGGATTG	>FASTK(-)_CGATAGCTGCTTCGGGATTGGCGTCCGGGCGGCTATCTAGGGGCTGCT	>FASTK(-)_GGCGTCCGGGCGGCTATCTAGGGGCTGCT
chr7	140696716	140696717	NDUFB2	71	+	396	51	447	5	228	35	1	36	3	3	5	>NDUFB2(+)_AGCGCCGGGGAAGCGAAGTA	>NDUFB2(+)_AGCGCCGGGGAAGCGAAGTAGGCAGGGGCGAGGCGGCTGGGGACCGCG	>NDUFB2(+)_AGGCAGGGGCGAGGCGGCTGGGGACCGCG
chr7	100158692	100158693	MAP11	189	-	349	96	445	3	223	34	2	36	3	15	11	>MAP11(-)_TCCCTTCCGCTTCCTGTTTC	>MAP11(-)_TCCCTTCCGCTTCCTGTTTCTCTCCAGTCATTCGGCTCAGTACCCCGG	>MAP11(-)_CTCTCCAGTCATTCGGCTCAGTACCCCGG
chr22	21002096	21002097	THAP7	152	-	395	47	442	5	197	35	1	36	9	3	3	>THAP7(-)_GGCGCGCGCTACCCCTCGCG	>THAP7(-)_GGCGCGCGCTACCCCTCGCGAGACTTCGGCGGCGCAGCAATGGCCAGA	>THAP7(-)_GAGACTTCGGCGGCGCAGCAATGGCCAGA
chr16	47461055	47461056	ITFG1	134	-	385	53	438	6	230	35	1	36	2	2	12	>ITFG1(-)_TGTCGTCAAGCGCGGCGTTG	>ITFG1(-)_TGTCGTCAAGCGCGGCGTTGGGCCGGCGGGCGGGGGCTGAGGGGCTGC	>ITFG1(-)_GGGCCGGCGGGCGGGGGCTGAGGGGCTGC
chr22	28772744	28772745	CCDC117	74	+	358	69	427	15	149	34	2	36	1	17	8	>CCDC117(+)_GTGGAGGGTTCTAGAAGGCG	>CCDC117(+)_GTGGAGGGTTCTAGAAGGCGTGACGTGGGGTCGAGAGCGGGATCCGAG	>CCDC117(+)_GTGACGTGGGGTCGAGAGCGGGATCCGAG
chr19	3971078	3971079	DAPK3	61	-	322	90	412	7	171	25	11	36	11	0	1	>DAPK3(-)_GCGCAGGCGCGTCGCGGCGG	>DAPK3(-)_GCGCAGGCGCGTCGCGGCGGCAGGGGCGCGGGGCTTCTGGAGGCGGCG	>DAPK3(-)_GCAGGGGCGCGGGGCTTCTGGAGGCGGCG
chr15	34988286	34988287	ZNF770	78	-	339	65	404	27	169	33	3	36	26	2	9	>ZNF770(-)_CTGGGCGCGCCAGAGCGCCG	>ZNF770(-)_CTGGGCGCGCCAGAGCGCCGCGCCTGCGCGCTCAGCCCGTTGCCGCGC	>ZNF770(-)_GCGCCTGCGCGCTCAGCCCGTTGCCGCGC
chr1	75786262	75786263	RABGGTB	154	+	178	224	402	32	116	21	15	36	1	16	6	>RABGGTB(+)_TAAGTCTACCCAGGAACTGA	>RABGGTB(+)_TAAGTCTACCCAGGAACTGACCCTGCTCTCTCCTTTCCCTGTTAGACA	>RABGGTB(+)_ACCCTGCTCTCTCCTTTCCCTGTTAGACA
chr21	43659565	43659566	RRP1B	38	+	303	95	398	9	186	31	5	36	9	7	4	>RRP1B(+)_GCCATCAGCCCGCGCGCCGC	>RRP1B(+)_GCCATCAGCCCGCGCGCCGCCGCCGCCGCCTTCTGTGCAGTCGCGGCC	>RRP1B(+)_CCGCCGCCGCCTTCTGTGCAGTCGCGGCC
chr20	31605288	31605289	ID1	669	+	279	99	378	600	140	31	5	36	67	84	18	>ID1(+)_GCGTGTTTATAAAAGACAAG	>ID1(+)_GCGTGTTTATAAAAGACAAGCTGTGGCTCCGCACTCTCATTCCACGTT	>ID1(+)_GCTGTGGCTCCGCACTCTCATTCCACGTT
chr12	120438117	120438118	COX6A1	99	+	244	127	371	19	237	29	7	36	11	13	11	>COX6A1(+)_CCAATTTTCCACTTCCGCTT	>COX6A1(+)_CCAATTTTCCACTTCCGCTTCCGGCGCTGCGGCAGTCCAGATCAAAAA	>COX6A1(+)_TCCGGCGCTGCGGCAGTCCAGATCAAAAA
chr18	158587	158588	USP14	70	+	285	50	335	40	191	32	4	36	5	21	19	>USP14(+)_CCGGTTTGAATGAGACTCGT	>USP14(+)_CCGGTTTGAATGAGACTCGTCGCACCGAAGCCGCCGCCACCACCGCGC	>USP14(+)_TCGCACCGAAGCCGCCGCCACCACCGCGC
chr8	144827559	144827560	ZNF7	66	+	274	44	318	11	187	35	1	36	10	6	8	>ZNF7(+)_AGTTTGCGGGGCGGGGCGGA	>ZNF7(+)_AGTTTGCGGGGCGGGGCGGACGCGGGTGGCCAAGGCCCGTTTCCGGCG	>ZNF7(+)_ACGCGGGTGGCCAAGGCCCGTTTCCGGCG
chr11	73876833	73876834	COA4	54	-	191	123	314	47	130	29	7	36	23	16	13	>COA4(-)_ACGCTCCCCACGAGGGGCTG	>COA4(-)_ACGCTCCCCACGAGGGGCTGGTTCCTGAAAGGATGTACAGAGGATCCC	>COA4(-)_GGTTCCTGAAAGGATGTACAGAGGATCCC
chr11	118401621	118401622	ATP5MG	31	+	237	58	295	10	248	34	2	36	9	12	18	>ATP5MG(+)_GGGACGGGGTCCTGCAGCGG	>ATP5MG(+)_GGGACGGGGTCCTGCAGCGGGTCCTTCCGGCGGGTGACATTCAGCCGG	>ATP5MG(+)_GGTCCTTCCGGCGGGTGACATTCAGCCGG
chr1	84574447	84574448	CTBS	268	-	205	88	293	4	99	31	5	36	3	3	9	>CTBS(-)_TGCCCCGACGCGCAGCAGGC	>CTBS(-)_TGCCCCGACGCGCAGCAGGCCCCGCCCACCCAGGCGGTAGGAACCCAC	>CTBS(-)_CCCCGCCCACCCAGGCGGTAGGAACCCAC
chr2	73071711	73071712	SFXN5	47	-	241	50	291	33	214	35	1	36	2	36	9	>SFXN5(-)_GGAGGGACATTTTAAAAGGG	>SFXN5(-)_GGAGGGACATTTTAAAAGGGCCGGAGATTGCGGGCGTCAGTGGCCATG	>SFXN5(-)_GCCGGAGATTGCGGGCGTCAGTGGCCATG
chr2	69643738	69643739	AAK1	303	-	247	40	287	18	140	32	4	36	5	4	9	>AAK1(-)_GCCGGGCGGGAGCGCGCGCG	>AAK1(-)_GCCGGGCGGGAGCGCGCGCGGGGGAGGGGCGGCGGGTCAGTCTCCGCC	>AAK1(-)_GGGGGAGGGGCGGCGGGTCAGTCTCCGCC
chr9	128504718	128504719	GLE1	310	+	191	91	282	1	225	31	5	36	6	6	3	>GLE1(+)_TTAGGGGCGGGGCTGTGCTG	>GLE1(+)_TTAGGGGCGGGGCTGTGCTGCGCGCGCGTCCCGGAAGCAGAAGCCTGT	>GLE1(+)_GCGCGCGCGTCCCGGAAGCAGAAGCCTGT
chr2	231056910	231056911	PSMD1	51	+	216	60	276	18	228	32	4	36	4	7	11	>PSMD1(+)_GCGAGAAGCGAGCCGGCGGC	>PSMD1(+)_GCGAGAAGCGAGCCGGCGGCCTGAGGAGGCGACTGACTGAGCAGCGCA	>PSMD1(+)_CCTGAGGAGGCGACTGACTGAGCAGCGCA
chr7	100867386	100867387	TRIP6	656	+	170	75	245	20	128	24	12	36	2	24	15	>TRIP6(+)_GTCCCCAAAATTAGGGAGGA	>TRIP6(+)_GTCCCCAAAATTAGGGAGGAAGAGGAAAAAAAAAAGCCAGAAAAAGTT	>TRIP6(+)_AAGAGGAAAAAAAAAAGCCAGAAAAAGTT
chr20	325554	325555	SOX12	51	+	203	41	244	4	132	33	3	36	4	7	6	>SOX12(+)_TGCGCGCGCCGGCGGGGCCG	>SOX12(+)_TGCGCGCGCCGGCGGGGCCGCGCGGGGAGAAAGACACTGAAAGGCGTC	>SOX12(+)_GCGCGGGGAGAAAGACACTGAAAGGCGTC
chr17	81918147	81918148	SIRT7	114	-	170	65	235	2	158	32	4	36	8	0	3	>SIRT7(-)_TGAGCGCGGCCTGCCGTGTG	>SIRT7(-)_TGAGCGCGGCCTGCCGTGTGAGGCGGAAGCGGAAGAGCAGGTCTCCAG	>SIRT7(-)_GAGGCGGAAGCGGAAGAGCAGGTCTCCAG
chr16	50025224	50025225	CNEP1R1	52	+	200	29	229	4	161	34	2	36	3	2	6	>CNEP1R1(+)_AGGGGCGGTGCGACGGGGAG	>CNEP1R1(+)_AGGGGCGGTGCGACGGGGAGGGGCAGCGGGGAGCGGTTAGAGGTGGGA	>CNEP1R1(+)_GGGGCAGCGGGGAGCGGTTAGAGGTGGGA
chr11	67288573	67288574	ANKRD13D	132	+	123	70	193	22	145	33	3	36	5	6	2	>ANKRD13D(+)_CTTCCTCTCCTGACGCTGGC	>ANKRD13D(+)_CTTCCTCTCCTGACGCTGGCAGCCAACCGCAGCCTCTGCAAAAGGGAC	>ANKRD13D(+)_CAGCCAACCGCAGCCTCTGCAAAAGGGAC
chr16	2520405	2520406	AMDHD2	100	+	129	63	192	9	80	34	2	36	9	9	5	>AMDHD2(+)_GCGGTCTCAGCTCTCGGCTG	>AMDHD2(+)_GCGGTCTCAGCTCTCGGCTGGGGTTCGTCACTGGGCGCGGGATTTGGC	>AMDHD2(+)_GGGGTTCGTCACTGGGCGCGGGATTTGGC
chr6	36874795	36874796	PPIL1	52	-	113	33	146	24	249	35	1	36	3	7	4	>PPIL1(-)_CCCCAGCTAATCGACGCCGG	>PPIL1(-)_CCCCAGCTAATCGACGCCGGAAGTAGCAATTACTAGACAAGCATTCCG	>PPIL1(-)_GAAGTAGCAATTACTAGACAAGCATTCCG
chr6	24720836	24720837	C6orf62	935	-	279	559	838	227	109	26	9	35	23	54	16	>C6orf62(-)_CGCTGCCATTTTAAGTTGTT	>C6orf62(-)_CGCTGCCATTTTAAGTTGTTTGTTCTCGCTTCTTTTCTCAAACGCGAC	>C6orf62(-)_TTGTTCTCGCTTCTTTTCTCAAACGCGAC
chr11	18394562	18394563	LDHA	442	+	386	432	818	345	126	18	17	35	59	53	12	>LDHA(+)_GCTGTTCCACTTAAGGCCCC	>LDHA(+)_GCTGTTCCACTTAAGGCCCCTCCCGCGCCCAGCTCAGAGTGCTGCAGC	>LDHA(+)_CTCCCGCGCCCAGCTCAGAGTGCTGCAGC
chr5	135399228	135399229	H2AFY	204	-	498	265	763	28	167	29	6	35	9	11	17	>H2AFY(-)_CTGTGCATTGTGGGAAGCCG	>H2AFY(-)_CTGTGCATTGTGGGAAGCCGGCCGCGAGGACTGGTTCCAGTTCACTCG	>H2AFY(-)_GGCCGCGAGGACTGGTTCCAGTTCACTCG
chr7	25125259	25125260	CYCS	284	-	403	340	743	257	121	23	12	35	42	146	38	>CYCS(-)_ACCGGTACTTAAGCGCGGAC	>CYCS(-)_ACCGGTACTTAAGCGCGGACCGGCGTGTCCTTGGACTTAGAGAGTGGG	>CYCS(-)_CCGGCGTGTCCTTGGACTTAGAGAGTGGG
chr5	171387856	171387857	NPM1	277	+	313	384	697	610	102	27	8	35	66	255	53	>NPM1(+)_GTCTATATATAAGCGCGGGG	>NPM1(+)_GTCTATATATAAGCGCGGGGAGCCTGCGTCCTTTCCCTGGTGTGATTC	>NPM1(+)_GAGCCTGCGTCCTTTCCCTGGTGTGATTC
chr19	33521788	33521789	PEPD	66	-	467	178	645	370	228	28	7	35	108	79	25	>PEPD(-)_CCATGCATTGGCACCCGGAG	>PEPD(-)_CCATGCATTGGCACCCGGAGGGGCTCAGCTGACGCCGCACTTCACGTG	>PEPD(-)_GGGGCTCAGCTGACGCCGCACTTCACGTG
chr13	21176687	21176688	MRPL57	89	+	423	210	633	33	200	28	7	35	1	12	16	>MRPL57(+)_ACGGGTGCGCTTACGCCACG	>MRPL57(+)_ACGGGTGCGCTTACGCCACGGCGTCTGCTGGCGGCCGCGGAGACGCAG	>MRPL57(+)_GGCGTCTGCTGGCGGCCGCGGAGACGCAG
chr18	36187524	36187525	MOCOS	68	+	520	94	614	12	213	33	2	35	5	5	17	>MOCOS(+)_CCGGCTTCGCGCACTTCCCG	>MOCOS(+)_CCGGCTTCGCGCACTTCCCGGGCCCGGCCGGCCTGGATGGACTAGCCG	>MOCOS(+)_GGGCCCGGCCGGCCTGGATGGACTAGCCG
chr6	27893184	27893185	HIST1H2AM	433	-	306	307	613	360	138	29	6	35	33	26	8	>HIST1H2AM(-)_CAGCTGCTATAAAATGCGCG	>HIST1H2AM(-)_CAGCTGCTATAAAATGCGCGTCCCTGTAGGTTCCTTTCACTCACTTTC	>HIST1H2AM(-)_GTCCCTGTAGGTTCCTTTCACTCACTTTC
chr1	63367667	63367668	ALG6	143	+	520	77	597	9	236	33	2	35	5	2	3	>ALG6(+)_CATGCGCCTTCCTGGGACCC	>ALG6(+)_CATGCGCCTTCCTGGGACCCACGGCAGGCGCGAATCCCAGCGGCCGGC	>ALG6(+)_CACGGCAGGCGCGAATCCCAGCGGCCGGC
chr6	36547447	36547448	STK38	376	-	450	116	566	13	122	30	5	35	8	0	0	>STK38(-)_GTCGCGCATGCGTAGTCTCG	>STK38(-)_GTCGCGCATGCGTAGTCTCGGCCCCGGGCTGCCGCGCCAGCCCGTCTC	>STK38(-)_GGCCCCGGGCTGCCGCGCCAGCCCGTCTC
chr1	32013869	32013870	KHDRBS1	102	+	399	165	564	20	179	31	4	35	18	2	7	>KHDRBS1(+)_GGCTGCGCACGCGCGCCGCC	>KHDRBS1(+)_GGCTGCGCACGCGCGCCGCCTCATTTCCGGTGCTCTCTCTCGCTGGGT	>KHDRBS1(+)_CTCATTTCCGGTGCTCTCTCTCGCTGGGT
chr5	6633448	6633449	SRD5A1	92	+	442	121	563	40	136	33	2	35	15	25	6	>SRD5A1(+)_GCTACCCCGGAGAAGCCTGA	>SRD5A1(+)_GCTACCCCGGAGAAGCCTGACTTGAGAACCCTTTCTGCAGAGTCCCGG	>SRD5A1(+)_ACTTGAGAACCCTTTCTGCAGAGTCCCGG
chr10	75111655	75111656	SAMD8	243	+	450	105	555	49	153	29	6	35	14	12	7	>SAMD8(+)_CTTGAGGCGCTTCACTCCGG	>SAMD8(+)_CTTGAGGCGCTTCACTCCGGCGAGGCGGGGAGGGCCCCGGACTCCGAC	>SAMD8(+)_GCGAGGCGGGGAGGGCCCCGGACTCCGAC
chr3	184299253	184299254	PSMD2	184	+	444	109	553	3	208	33	2	35	16	23	16	>PSMD2(+)_AAGGGCGGTGCGAGCGGGTG	>PSMD2(+)_AAGGGCGGTGCGAGCGGGTGCGCGCGCAGCGGGCCGGCAGTGGCGGCG	>PSMD2(+)_GCGCGCGCAGCGGGCCGGCAGTGGCGGCG
chr6	27146854	27146855	HIST1H2BK	2009	-	141	407	548	386	93	17	18	35	30	33	10	>HIST1H2BK(-)_AGGTCCTATATAAAAACGAC	>HIST1H2BK(-)_AGGTCCTATATAAAAACGACTCCTGGTACCTTGCTCCCATTACTTCCC	>HIST1H2BK(-)_CTCCTGGTACCTTGCTCCCATTACTTCCC
chr3	49412398	49412399	TCTA	210	+	387	151	538	27	202	32	3	35	6	9	17	>TCTA(+)_GGAAGACCACACGCGTGCGT	>TCTA(+)_GGAAGACCACACGCGTGCGTGGTGGGGACTACGGTGACAGTACCCCGG	>TCTA(+)_TGGTGGGGACTACGGTGACAGTACCCCGG
chr16	68264549	68264550	SLC7A6	19	+	462	64	526	9	196	32	3	35	12	3	13	>SLC7A6(+)_GGGCCTGAGCTGCCGCGGCG	>SLC7A6(+)_GGGCCTGAGCTGCCGCGGCGGCGGCGGCGCGACCGAGCATCCTGGCGG	>SLC7A6(+)_GGCGGCGGCGCGACCGAGCATCCTGGCGG
chr19	8444985	8444986	HNRNPM	152	+	339	185	524	5	195	30	5	35	14	9	4	>HNRNPM(+)_GCGCAGCGCGGTGCAGCCCG	>HNRNPM(+)_GCGCAGCGCGGTGCAGCCCGTTCGCTCACACAAAGCCCAGACGCGGAG	>HNRNPM(+)_GTTCGCTCACACAAAGCCCAGACGCGGAG
chr9	109013498	109013499	CTNNAL1	443	-	342	180	522	57	143	26	9	35	18	14	1	>CTNNAL1(-)_GCGAGTGTCCTGTCGCCGCC	>CTNNAL1(-)_GCGAGTGTCCTGTCGCCGCCGCCTCGGGCGGGTGGGCTGACTGGCGGC	>CTNNAL1(-)_CGCCTCGGGCGGGTGGGCTGACTGGCGGC
chr7	157138948	157138949	UBE3C	105	+	406	105	511	20	279	34	1	35	8	14	17	>UBE3C(+)_CGTCTGCAGGGCCGCGCACG	>UBE3C(+)_CGTCTGCAGGGCCGCGCACGCACTGACGGCTGACCGCCATCTTCCCTC	>UBE3C(+)_GCACTGACGGCTGACCGCCATCTTCCCTC
chr22	17638780	17638781	BCL2L13	340	+	361	147	508	55	189	30	5	35	19	33	22	>BCL2L13(+)_GCCGGGGTGACCTCACCCTC	>BCL2L13(+)_GCCGGGGTGACCTCACCCTCCAACATGGCGGCGGCGGTAGATTAGGGC	>BCL2L13(+)_CCAACATGGCGGCGGCGGTAGATTAGGGC
chr17	28719994	28719995	RPL23A	47	+	300	206	506	344	237	25	10	35	63	138	46	>RPL23A(+)_TTGGCGCTATAAGCCCGTGG	>RPL23A(+)_TTGGCGCTATAAGCCCGTGGGAACGAGCATTGGAGACCCTTTTCACAA	>RPL23A(+)_GGAACGAGCATTGGAGACCCTTTTCACAA
chr1	153535990	153535991	S100A6	1148	-	206	299	505	292	94	21	14	35	45	28	16	>S100A6(-)_CCGACCGCTATAAGGCCAGT	>S100A6(-)_CCGACCGCTATAAGGCCAGTCGGACTGCGACACAGCCCATCCCCTCGA	>S100A6(-)_TCGGACTGCGACACAGCCCATCCCCTCGA
chr3	183697805	183697806	YEATS2	109	+	406	96	502	5	269	32	3	35	4	0	1	>YEATS2(+)_GAGGCCGCGCGCGCCGCCGC	>YEATS2(+)_GAGGCCGCGCGCGCCGCCGCGCGCGCCCCGACGCGCCCAGCTGCTGAC	>YEATS2(+)_CGCGCGCCCCGACGCGCCCAGCTGCTGAC
chr6	27872345	27872346	HIST1H3I	486	-	240	237	477	256	143	24	11	35	18	34	4	>HIST1H3I(-)_GCAGCTATAAATACCGGGAT	>HIST1H3I(-)_GCAGCTATAAATACCGGGATGATCAGTTTTTTTCTCTCATTTGTGTTG	>HIST1H3I(-)_TGATCAGTTTTTTTCTCTCATTTGTGTTG
chr5	82278353	82278354	RPS23	189	-	184	286	470	150	115	26	9	35	47	51	23	>RPS23(-)_GCTCGCGGTGGCTTGTGGCT	>RPS23(-)_GCTCGCGGTGGCTTGTGGCTCCTTCCTGCGGTGCTTCTCTCTTTCGCT	>RPS23(-)_TCCTTCCTGCGGTGCTTCTCTCTTTCGCT
chr19	55259005	55259006	PPP6R1	189	-	359	98	457	25	212	31	4	35	7	13	7	>PPP6R1(-)_GCCTCCTGCGTCGTCCTGCG	>PPP6R1(-)_GCCTCCTGCGTCGTCCTGCGCTAGGGGGATTGTGGGATAGTGGCGGAG	>PPP6R1(-)_GCTAGGGGGATTGTGGGATAGTGGCGGAG
chr1	36307111	36307112	SH3D21	295	+	228	229	457	12	90	29	6	35	1	5	2	>SH3D21(+)_AGGGACCAAAGGCTACGTGC	>SH3D21(+)_AGGGACCAAAGGCTACGTGCGCGCCTTGCGCTTCCCCCAGCTCCTCTG	>SH3D21(+)_CGCGCCTTGCGCTTCCCCCAGCTCCTCTG
chr2	27629056	27629057	GPN1	112	+	348	104	452	10	158	31	4	35	6	6	9	>GPN1(+)_GCGGTGTCTCTATGGTCGGG	>GPN1(+)_GCGGTGTCTCTATGGTCGGGTGGGTGGGGCCAGGAGGAAGATGGCGGC	>GPN1(+)_GTGGGTGGGGCCAGGAGGAAGATGGCGGC
chr17	2593653	2593654	PAFAH1B1	273	+	339	111	450	34	154	30	5	35	6	30	12	>PAFAH1B1(+)_GCGCGGTGACGTCAGGGCGT	>PAFAH1B1(+)_GCGCGGTGACGTCAGGGCGTTGGGGCAGCTCCTGTGACAGACGGAGCT	>PAFAH1B1(+)_TTGGGGCAGCTCCTGTGACAGACGGAGCT
chr10	97426278	97426279	PGAM1	171	+	383	67	450	19	152	31	4	35	11	59	24	>PGAM1(+)_CGACGGGGCGGGCTGCTACT	>PGAM1(+)_CGACGGGGCGGGCTGCTACTCCGGAATCTGCTAATCCCAGTCGGTGCC	>PGAM1(+)_TCCGGAATCTGCTAATCCCAGTCGGTGCC
chr1	193059634	193059635	RO60	119	+	290	156	446	22	159	26	9	35	3	8	8	>RO60(+)_AAGAAGAGGGGCAGGACTCG	>RO60(+)_AAGAAGAGGGGCAGGACTCGTTCCCGGGAACCGAACCTGGAATCCCCG	>RO60(+)_GTTCCCGGGAACCGAACCTGGAATCCCCG
chr15	101277473	101277474	SELENOS	133	-	366	78	444	10	189	30	5	35	7	14	8	>SELENOS(-)_CCGCGTCCGGGCGCGCCACG	>SELENOS(-)_CCGCGTCCGGGCGCGCCACGTGTGCGTAGGAGCGCACCGGAAGCGCCC	>SELENOS(-)_GTGTGCGTAGGAGCGCACCGGAAGCGCCC
chr13	25301624	25301625	NUP58	194	+	308	132	440	78	186	29	6	35	16	4	7	>NUP58(+)_GCGCCGGGCGTACTTTTGCG	>NUP58(+)_GCGCCGGGCGTACTTTTGCGTGGTTGCTCCACCCCCTCAGCCTTGCCT	>NUP58(+)_GTGGTTGCTCCACCCCCTCAGCCTTGCCT
chr11	66677855	66677856	RBM4B	48	-	338	94	432	10	224	32	3	35	5	7	4	>RBM4B(-)_GCAGCGCGCACTCGCGCGTG	>RBM4B(-)_GCAGCGCGCACTCGCGCGTGCGTGAGCTGGCGCGCGAGAAAGGGCCCG	>RBM4B(-)_GCGTGAGCTGGCGCGCGAGAAAGGGCCCG
chr9	35072624	35072625	VCP	251	-	189	237	426	30	138	25	10	35	10	7	6	>VCP(-)_AGCAGCTTCCCTTCCGATGA	>VCP(-)_AGCAGCTTCCCTTCCGATGATTCGGCTCTTCTCGGCTCAGTCTCAGCG	>VCP(-)_ATTCGGCTCTTCTCGGCTCAGTCTCAGCG
chr1	113073187	113073188	LRIG2	140	+	377	48	425	12	190	33	2	35	1	9	3	>LRIG2(+)_CGATTGGCTGGCCCCTGTGC	>LRIG2(+)_CGATTGGCTGGCCCCTGTGCGTGAGGACGTTGCGCCGTGGGGAGGGGC	>LRIG2(+)_CGTGAGGACGTTGCGCCGTGGGGAGGGGC
chr17	12020876	12020877	MAP2K4	76	+	291	130	421	25	203	32	3	35	6	23	10	>MAP2K4(+)_TGCTGCATTGCAGCCGCCGC	>MAP2K4(+)_TGCTGCATTGCAGCCGCCGCGGCGCCGCTCGGCTCTTCACTCCCAACA	>MAP2K4(+)_CGGCGCCGCTCGGCTCTTCACTCCCAACA
chr16	13920173	13920174	ERCC4	83	+	294	124	418	15	243	32	3	35	11	8	8	>ERCC4(+)_TGCGTTCGGCTGCGACCCGG	>ERCC4(+)_TGCGTTCGGCTGCGACCCGGAAGAGCTTCCATGGAGTCAGGGCAGCCG	>ERCC4(+)_GAAGAGCTTCCATGGAGTCAGGGCAGCCG
chr20	35742235	35742236	RBM39	137	-	296	119	415	65	188	34	1	35	12	54	25	>RBM39(-)_GTTTGTGTGTGTGTATGTGT	>RBM39(-)_GTTTGTGTGTGTGTATGTGTGCTGGTGAATGTGAGTACAGGGAAGCAG	>RBM39(-)_TGCTGGTGAATGTGAGTACAGGGAAGCAG
chr15	65611122	65611123	INTS14	157	-	355	58	413	17	150	33	2	35	10	6	2	>INTS14(-)_GGACGGAAAGTTTATGCCGA	>INTS14(-)_GGACGGAAAGTTTATGCCGACGGAAAGTTTATGCCGACGGACTGTGTC	>INTS14(-)_ACGGAAAGTTTATGCCGACGGACTGTGTC
chr6	87472976	87472977	SLC35A1	303	+	356	55	411	27	248	35	0	35	11	19	19	>SLC35A1(+)_CCGGTGTCCTGCGCGGGGGC	>SLC35A1(+)_CCGGTGTCCTGCGCGGGGGCGCGGAGGGGGCGGGCGTCAGTTCCGCGG	>SLC35A1(+)_CGCGGAGGGGGCGGGCGTCAGTTCCGCGG
chr7	2242169	2242170	MRM2	60	-	283	127	410	4	193	28	7	35	5	6	23	>MRM2(-)_GGCACTTCCGGCGGCGCGCT	>MRM2(-)_GGCACTTCCGGCGGCGCGCTGCAGGCGCGGGGAACACCAATGGCGGGG	>MRM2(-)_TGCAGGCGCGGGGAACACCAATGGCGGGG
chr1	26280098	26280099	SH3BGRL3	194	+	220	175	395	14	128	29	6	35	4	20	10	>SH3BGRL3(+)_AACCGCTCCCGAGCACGGCG	>SH3BGRL3(+)_AACCGCTCCCGAGCACGGCGGCGGCGTCGTCTCCCGGCAGTGCAGCTG	>SH3BGRL3(+)_GGCGGCGTCGTCTCCCGGCAGTGCAGCTG
chr10	96043582	96043583	CCNJ	281	+	247	147	394	68	188	31	4	35	8	15	2	>CCNJ(+)_GCGCTGGCTTTGTATGCGGA	>CCNJ(+)_GCGCTGGCTTTGTATGCGGAGCCGCCTGCCGGTCCTTTAACAATGGGC	>CCNJ(+)_AGCCGCCTGCCGGTCCTTTAACAATGGGC
chr21	33915767	33915768	ATP5PO	59	-	287	83	370	14	195	31	4	35	6	6	8	>ATP5PO(-)_CTCTCTTCCCACTCGGGTTT	>ATP5PO(-)_CTCTCTTCCCACTCGGGTTTGACCTACAGCCGCCCGGGAGAAGATGGC	>ATP5PO(-)_TGACCTACAGCCGCCCGGGAGAAGATGGC
chr5	178131016	178131017	RMND5B	129	+	282	86	368	91	170	32	3	35	28	14	6	>RMND5B(+)_GCCGCCGATCGCCCGCCGCG	>RMND5B(+)_GCCGCCGATCGCCCGCCGCGGCTTCCGGTTCCGATGACAGTGGCGCCG	>RMND5B(+)_GGCTTCCGGTTCCGATGACAGTGGCGCCG
chr17	74203677	74203678	RPL38	174	+	192	168	360	125	145	30	5	35	22	37	13	>RPL38(+)_TTGGGAGGGTTTAACTGCCC	>RPL38(+)_TTGGGAGGGTTTAACTGCCCGGAAACGGAAGTCTCGTTCTTTTTCGTC	>RPL38(+)_CGGAAACGGAAGTCTCGTTCTTTTTCGTC
chr1	230642511	230642512	COG2	64	+	291	68	359	42	228	33	2	35	7	1	4	>COG2(+)_CGCTGCCATGTTGGCGGAAG	>COG2(+)_CGCTGCCATGTTGGCGGAAGCGGACCCCCCTGTGCCGTGGAAACTGGC	>COG2(+)_GCGGACCCCCCTGTGCCGTGGAAACTGGC
chr11	43311997	43311998	API5	33	+	260	84	344	15	250	29	6	35	10	4	7	>API5(+)_TACGTAGACGTCGGGGGCGC	>API5(+)_TACGTAGACGTCGGGGGCGCAGCCGCGCTGTGCGCGGTGACTGGCGGC	>API5(+)_CAGCCGCGCTGTGCGCGGTGACTGGCGGC
chr7	118184168	118184169	LSM8	33	+	195	148	343	147	209	22	13	35	31	17	6	>LSM8(+)_CAGGCGCTATCCGCTGCCGG	>LSM8(+)_CAGGCGCTATCCGCTGCCGGGTTCTGGCGCGCCCTTTCAGTTCTGCTT	>LSM8(+)_GGTTCTGGCGCGCCCTTTCAGTTCTGCTT
chr18	49487203	49487204	C18orf32	173	-	259	62	321	56	133	34	1	35	7	4	2	>C18orf32(-)_GTGCGGACATTGTCAGCTGC	>C18orf32(-)_GTGCGGACATTGTCAGCTGCGTTTCCGCGGTCGCGGGTGAGTGTGCCC	>C18orf32(-)_CGTTTCCGCGGTCGCGGGTGAGTGTGCCC
chr21	39183413	39183414	PSMG1	194	-	187	132	319	43	112	26	9	35	15	15	9	>PSMG1(-)_GGTCTCGCGCAAGCCGGCGT	>PSMG1(-)_GGTCTCGCGCAAGCCGGCGTGCGGTCCCGCGGCGCTGCAGTTGTGTCC	>PSMG1(-)_TGCGGTCCCGCGGCGCTGCAGTTGTGTCC
chr2	219178147	219178148	CNPPD1	76	-	242	71	313	0	183	34	1	35	3	2	3	>CNPPD1(-)_CCCCCCCCGGATAGGGCGGG	>CNPPD1(-)_CCCCCCCCGGATAGGGCGGGCCGCGCATGCGCCCCGGCGGCTGCCGCT	>CNPPD1(-)_GCCGCGCATGCGCCCCGGCGGCTGCCGCT
chr3	136250351	136250352	PCCB	44	+	288	19	307	5	271	32	3	35	3	5	5	>PCCB(+)_ACCCACGCTTTAGCACATGC	>PCCB(+)_ACCCACGCTTTAGCACATGCGTACTCAGGTGCGCCGGTAGGGGACGCG	>PCCB(+)_CGTACTCAGGTGCGCCGGTAGGGGACGCG
chr19	14419340	14419341	DDX39A	73	-	226	75	301	89	166	31	4	35	21	12	9	>DDX39A(-)_GCAGCCCGACGCAAGAGGCA	>DDX39A(-)_GCAGCCCGACGCAAGAGGCAGGAAGCGCAGCAACTCGTGTCTGAGCGC	>DDX39A(-)_AGGAAGCGCAGCAACTCGTGTCTGAGCGC
chr11	76381121	76381122	THAP12	31	-	169	116	285	5	155	34	1	35	0	11	2	>THAP12(-)_AAGAGAGGGCACCCCCGGGC	>THAP12(-)_AAGAGAGGGCACCCCCGGGCGTCAGGGTGCATTGTGGGAAGGAGGCGG	>THAP12(-)_CGTCAGGGTGCATTGTGGGAAGGAGGCGG
chr17	7614894	7614895	FXR2	59	-	223	50	273	4	159	32	3	35	5	1	6	>FXR2(-)_CCCCGCGCGCAGCGGGCGGG	>FXR2(-)_CCCCGCGCGCAGCGGGCGGGTGCCCGGTGCGCCTGCGCAGTAGGCGGC	>FXR2(-)_GTGCCCGGTGCGCCTGCGCAGTAGGCGGC
chr9	32552585	32552586	TOPORS	164	-	213	54	267	9	222	34	1	35	3	8	1	>TOPORS(-)_AGGAAGAGGCGGAGTCGAGG	>TOPORS(-)_AGGAAGAGGCGGAGTCGAGGTGAGGGAGTGAAATGCTTAATTCAGGAA	>TOPORS(-)_GTGAGGGAGTGAAATGCTTAATTCAGGAA
chr11	119084913	119084914	HMBS	28	+	241	9	250	1	268	35	0	35	0	4	1	>HMBS(+)_GCCGGAAGTGACGCGAGGCT	>HMBS(+)_GCCGGAAGTGACGCGAGGCTCTGCGGAGACCAGGAGTCAGACTGTAGG	>HMBS(+)_TCTGCGGAGACCAGGAGTCAGACTGTAGG
chr12	53006455	53006456	EIF4B	37	+	166	83	249	47	140	31	4	35	21	8	1	>EIF4B(+)_ACGCGCCCGCTATAATCACG	>EIF4B(+)_ACGCGCCCGCTATAATCACGTGATTGCCTCATCCGGGTCTTTTGCGTT	>EIF4B(+)_GTGATTGCCTCATCCGGGTCTTTTGCGTT
chr8	144950622	144950623	ZNF16	62	-	194	49	243	0	202	33	2	35	0	3	6	>ZNF16(-)_CCGCGCGGGGGGTTGTGGGA	>ZNF16(-)_CCGCGCGGGGGGTTGTGGGAGCGCGGGGGGGGCGGGGCGGGGGCAGCT	>ZNF16(-)_AGCGCGGGGGGGGCGGGGCGGGGGCAGCT
chr17	75131741	75131742	NT5C	319	-	177	62	239	2	123	33	2	35	2	2	6	>NT5C(-)_CAGCGCTCCCTCCGCTTCCG	>NT5C(-)_CAGCGCTCCCTCCGCTTCCGGCCGAGCCCGCGCCCCCCAGACCCCGAG	>NT5C(-)_GGCCGAGCCCGCGCCCCCCAGACCCCGAG
chr17	40287882	40287883	CDC6	27	+	126	99	225	19	184	23	12	35	16	6	10	>CDC6(+)_CCGGGCTTTGGCGGGAGGTG	>CDC6(+)_CCGGGCTTTGGCGGGAGGTGGGAACGCTGTGGCCATTCGGATTTGGCG	>CDC6(+)_GGGAACGCTGTGGCCATTCGGATTTGGCG
chr7	107563987	107563988	DUS4L	64	+	192	29	221	0	238	34	1	35	0	6	3	>DUS4L(+)_GTGACGCAGAATCCCGGCGC	>DUS4L(+)_GTGACGCAGAATCCCGGCGCCGCCCGCCCACCCAGCCCATGGCTCCAG	>DUS4L(+)_CCGCCCGCCCACCCAGCCCATGGCTCCAG
chr6	33277158	33277159	B3GALT4	21	+	59	27	86	0	37	29	6	35	1	3	5	>B3GALT4(+)_GCAGACCGGCCGCCGGGGCG	>B3GALT4(+)_GCAGACCGGCCGCCGGGGCGAGGCGGGGGAGGGGCCGTGAGTGCCGCA	>B3GALT4(+)_GAGGCGGGGGAGGGGCCGTGAGTGCCGCA
chr9	128552589	128552590	SPTAN1	714	+	394	477	871	608	135	22	12	34	48	63	15	>SPTAN1(+)_GCCGCTTATAAAAGAGGCGG	>SPTAN1(+)_GCCGCTTATAAAAGAGGCGGGGCGCGCGCGTCGCCGCCACTACCCGCT	>SPTAN1(+)_GGGCGCGCGCGTCGCCGCCACTACCCGCT
chr5	180353335	180353336	GFPT2	302	-	586	215	801	0	137	29	5	34	0	0	1	>GFPT2(-)_GGCTCCGGGTTATAAGGGCT	>GFPT2(-)_GGCTCCGGGTTATAAGGGCTGGAGGCCGAGCGGACGGGAGCTGGAGCC	>GFPT2(-)_TGGAGGCCGAGCGGACGGGAGCTGGAGCC
chr11	10808922	10808923	EIF4G2	703	-	175	603	778	407	119	19	15	34	41	44	10	>EIF4G2(-)_AAGAGTGATAAGTTCGGCTT	>EIF4G2(-)_AAGAGTGATAAGTTCGGCTTCAGACACGCCTTAGCGCCAGCAGTGAGT	>EIF4G2(-)_TCAGACACGCCTTAGCGCCAGCAGTGAGT
chr10	116742565	116742566	HSPA12A	5124	-	544	231	775	28	168	27	7	34	5	1	2	>HSPA12A(-)_TGCCGCGTCAGAGCAGCGCT	>HSPA12A(-)_TGCCGCGTCAGAGCAGCGCTCCCGCTGCCCGGCGGCTCAGACACGGCC	>HSPA12A(-)_TCCCGCTGCCCGGCGGCTCAGACACGGCC
chr1	224183239	224183240	DEGS1	314	+	506	229	735	54	215	30	4	34	18	27	18	>DEGS1(+)_GCCTCCGTCTCCTCCGCGCT	>DEGS1(+)_GCCTCCGTCTCCTCCGCGCTCCGCCACAGCCGGCCGACACCACACCAG	>DEGS1(+)_TCCGCCACAGCCGGCCGACACCACACCAG
chr7	1459469	1459470	MICALL2	425	-	428	289	717	130	105	30	4	34	15	14	9	>MICALL2(-)_GCTCGGCTTCTCTTAGGGAC	>MICALL2(-)_GCTCGGCTTCTCTTAGGGACCCGGCACTCGTCGCCCTCAGTCCGGCTC	>MICALL2(-)_CCCGGCACTCGTCGCCCTCAGTCCGGCTC
chr19	572595	572596	BSG	1226	+	411	265	676	588	147	28	6	34	82	126	37	>BSG(+)_CTCCGCCGCTTTTTATAGCG	>BSG(+)_CTCCGCCGCTTTTTATAGCGGCCGCGGGCGGCGGCGGCAGCGGTTGGA	>BSG(+)_GGCCGCGGGCGGCGGCGGCAGCGGTTGGA
chr11	43358943	43358944	TTC17	60	+	468	160	628	2	243	26	8	34	3	5	3	>TTC17(+)_GGAGACTAGCTTCCGCTTCC	>TTC17(+)_GGAGACTAGCTTCCGCTTCCGGTGTGAGCGGCCCGGCCGGGGGGGCAA	>TTC17(+)_CGGTGTGAGCGGCCCGGCCGGGGGGGCAA
chr10	3172781	3172782	PITRM1	110	-	269	353	622	63	152	18	16	34	8	10	4	>PITRM1(-)_GTCGGGTTAAGAGGGGGTTC	>PITRM1(-)_GTCGGGTTAAGAGGGGGTTCCTCGCCAGCCAGGTGCTCGTCATGCGCA	>PITRM1(-)_CCTCGCCAGCCAGGTGCTCGTCATGCGCA
chr17	41966797	41966798	CNP	92	+	303	296	599	220	103	22	12	34	25	42	7	>CNP(+)_CGGGCTATGTAAAGCGGCCG	>CNP(+)_CGGGCTATGTAAAGCGGCCGGGCTCGGGTCGTGCCACCGCTGGACTCC	>CNP(+)_GGGCTCGGGTCGTGCCACCGCTGGACTCC
chr7	23531980	23531981	TRA2A	391	-	310	252	562	220	135	27	7	34	74	36	12	>TRA2A(-)_TCTGAGGAGGCCAGGAGATT	>TRA2A(-)_TCTGAGGAGGCCAGGAGATTTCTGGCGGCGCCGGCGCCATTTTGCTGG	>TRA2A(-)_TTCTGGCGGCGCCGGCGCCATTTTGCTGG
chr5	72816694	72816695	TNPO1	363	+	387	175	562	26	159	29	5	34	6	4	4	>TNPO1(+)_CTTTGTTCCGCAGCCATTTC	>TNPO1(+)_CTTTGTTCCGCAGCCATTTCAGGCCCCGGACAGGAGGCAGTGCCGCTT	>TNPO1(+)_CAGGCCCCGGACAGGAGGCAGTGCCGCTT
chr2	106194298	106194299	UXS1	132	-	372	178	550	44	224	30	4	34	28	7	8	>UXS1(-)_CGGGGCTCTCGGGGCCGCTG	>UXS1(-)_CGGGGCTCTCGGGGCCGCTGCCGCCGCCGCCGCCGCGCATTGTGCAGC	>UXS1(-)_GCCGCCGCCGCCGCCGCGCATTGTGCAGC
chr3	184248915	184248916	ALG3	379	-	489	60	549	42	225	33	1	34	12	1	5	>ALG3(-)_GGCGCACCGTTAAGATGGCG	>ALG3(-)_GGCGCACCGTTAAGATGGCGGCTGGGCTGCGGAAACGCGGCCGGTCCG	>ALG3(-)_GGCTGGGCTGCGGAAACGCGGCCGGTCCG
chr15	72272548	72272549	PARP6	20	-	426	121	547	28	150	30	4	34	9	7	1	>PARP6(-)_GCCCCTTGGCCTGCCGCTCC	>PARP6(-)_GCCCCTTGGCCTGCCGCTCCGCCCCCGCGGGGCGTCCCGGGCCGCTCG	>PARP6(-)_CGCCCCCGCGGGGCGTCCCGGGCCGCTCG
chr17	30378935	30378936	CPD	84	+	391	155	546	14	232	27	7	34	1	7	4	>CPD(+)_GCGAGGAGGGGATCCGGCGG	>CPD(+)_GCGAGGAGGGGATCCGGCGGGCCCCCGCCGCCCGGAGCGCTGAGCCGC	>CPD(+)_GGCCCCCGCCGCCCGGAGCGCTGAGCCGC
chr19	35900539	35900540	NFKBID	488	-	285	260	545	103	132	18	16	34	3	26	3	>NFKBID(-)_CCCTAGTTTAAAAACTCGCG	>NFKBID(-)_CCCTAGTTTAAAAACTCGCGGGTACCGGACCCAAGATCGGGGACCCGG	>NFKBID(-)_GGGTACCGGACCCAAGATCGGGGACCCGG
chr20	46689433	46689434	TP53RK	94	-	408	131	539	13	178	30	4	34	6	8	4	>TP53RK(-)_AGCATCGCGACAGTTTTCAG	>TP53RK(-)_AGCATCGCGACAGTTTTCAGAGACAGCTGATCGGTTGGAGCTGTTGCG	>TP53RK(-)_GAGACAGCTGATCGGTTGGAGCTGTTGCG
chr10	98446914	98446915	HPS1	312	-	426	110	536	12	155	31	3	34	20	7	4	>HPS1(-)_TCACGCGGTCCTACCCGGAA	>HPS1(-)_TCACGCGGTCCTACCCGGAAGCGCGCCCGGGCTCCTGCAGGCGGGGCG	>HPS1(-)_AGCGCGCCCGGGCTCCTGCAGGCGGGGCG
chr3	195442988	195442989	ACAP2	173	-	394	134	528	50	168	30	4	34	10	27	13	>ACAP2(-)_CTGGGGCCTGACTAGTCGTC	>ACAP2(-)_CTGGGGCCTGACTAGTCGTCGCCGTCTTCGCGGCTGCTATGACCAGCG	>ACAP2(-)_CGCCGTCTTCGCGGCTGCTATGACCAGCG
chr19	8321374	8321375	NDUFA7	904	-	371	156	527	19	200	26	8	34	28	12	8	>NDUFA7(-)_CAGCCCCAGCGGTGGAGACG	>NDUFA7(-)_CAGCCCCAGCGGTGGAGACGTCACCGGCTGCGCCCTTCAGTATCGCGG	>NDUFA7(-)_GTCACCGGCTGCGCCCTTCAGTATCGCGG
chr12	122896110	122896111	VPS37B	77	-	423	96	519	22	163	31	3	34	7	17	5	>VPS37B(-)_GCGGGGGGCGGCCCTTGAGG	>VPS37B(-)_GCGGGGGGCGGCCCTTGAGGGCGGCGCTTCCGGTCGGCGGAGCCTGGT	>VPS37B(-)_GGCGGCGCTTCCGGTCGGCGGAGCCTGGT
chr17	7687487	7687488	TP53	175	-	149	362	511	124	41	22	12	34	15	39	14	>TP53(-)_CATGTGCTCAAGACTGGCGC	>TP53(-)_CATGTGCTCAAGACTGGCGCTAAAAGTTTTGAGCTTCTCAAAAGTCTA	>TP53(-)_CTAAAAGTTTTGAGCTTCTCAAAAGTCTA
chr19	36140135	36140136	CAPNS1	294	+	289	220	509	51	112	26	8	34	19	12	9	>CAPNS1(+)_CTGCGGGAGGCCCGGGAGCG	>CAPNS1(+)_CTGCGGGAGGCCCGGGAGCGGCAGTGGAACCGACTCCCAGAACTCCGG	>CAPNS1(+)_GGCAGTGGAACCGACTCCCAGAACTCCGG
chr9	34048884	34048885	UBAP2	120	-	300	206	506	40	123	32	2	34	21	59	29	>UBAP2(-)_GGCAGCCTGTGCCGCCGCCG	>UBAP2(-)_GGCAGCCTGTGCCGCCGCCGCCGCTTTGTAAGAGGCACATTGGCAGGT	>UBAP2(-)_GCCGCTTTGTAAGAGGCACATTGGCAGGT
chr16	67893271	67893272	PSKH1	152	+	444	59	503	4	224	31	3	34	4	2	4	>PSKH1(+)_CAGCTGCGCGCTGTGATGAC	>PSKH1(+)_CAGCTGCGCGCTGTGATGACGCCACGACGCTAACGCCCGAGAATGGCG	>PSKH1(+)_CGCCACGACGCTAACGCCCGAGAATGGCG
chr19	3626774	3626775	CACTIN	133	-	395	101	496	18	258	31	3	34	7	45	28	>CACTIN(-)_CAGCGCAGGCTTCGGCTATT	>CACTIN(-)_CAGCGCAGGCTTCGGCTATTGGTGTTGGTGCCGCGGCCACTGGCCCAG	>CACTIN(-)_TGGTGTTGGTGCCGCGGCCACTGGCCCAG
chr10	78033862	78033863	RPS24	368	+	340	150	490	369	210	34	0	34	57	42	11	>RPS24(+)_CCGTGCGCGTTGATATGATT	>RPS24(+)_CCGTGCGCGTTGATATGATTGGCCGGCGAATCGTGGTTCTCTTTTCCT	>RPS24(+)_TGGCCGGCGAATCGTGGTTCTCTTTTCCT
chr7	123748980	123748981	WASL	72	-	332	158	490	41	137	25	9	34	1	13	5	>WASL(-)_GAGTTGGGAGTTTAGCGCAG	>WASL(-)_GAGTTGGGAGTTTAGCGCAGTCGCCGGAGTGCGAGGACAACGACCATC	>WASL(-)_GTCGCCGGAGTGCGAGGACAACGACCATC
chr15	41417131	41417132	RTF1	99	+	365	121	486	9	158	29	5	34	5	7	4	>RTF1(+)_AGGGGGGCGGAGCGGAGCGC	>RTF1(+)_AGGGGGGCGGAGCGGAGCGCGCATGCGCGGTCGCCTTTGTGTGGGTCG	>RTF1(+)_CGCATGCGCGGTCGCCTTTGTGTGGGTCG
chr19	8321499	8321500	RPS28	618	+	290	191	481	678	134	29	5	34	85	55	15	>RPS28(+)_GAACGTCCTATAAAGGCTCT	>RPS28(+)_GAACGTCCTATAAAGGCTCTCCCCGAAGCACGTGACTCCTCTCCGCCA	>RPS28(+)_TCCCCGAAGCACGTGACTCCTCTCCGCCA
chr11	65919033	65919034	C11orf68	546	-	225	253	478	404	100	26	8	34	69	252	0	>C11orf68(-)_GCCTGTCTATAAAGTTGTTG	>C11orf68(-)_GCCTGTCTATAAAGTTGTTGTTGAGGTGGCGCGGCGCTAAGATGGCGG	>C11orf68(-)_GTTGAGGTGGCGCGGCGCTAAGATGGCGG
chr2	39779257	39779258	THUMPD2	242	-	389	87	476	5	173	33	1	34	4	3	9	>THUMPD2(-)_AGCCGCTCGCGCCCGAGGCC	>THUMPD2(-)_AGCCGCTCGCGCCCGAGGCCACGTGACCCGAAGGCGCGAGGGCGCGCC	>THUMPD2(-)_CACGTGACCCGAAGGCGCGAGGGCGCGCC
chr1	2391841	2391842	RER1	147	+	407	67	474	38	188	31	3	34	15	9	8	>RER1(+)_GGGGGCCCTGGAGGCGGCGC	>RER1(+)_GGGGGCCCTGGAGGCGGCGCCGCGGAGGACGGAGCGGAAGTGCTCGCT	>RER1(+)_CCGCGGAGGACGGAGCGGAAGTGCTCGCT
chr3	44477653	44477654	ZNF445	80	-	322	147	469	10	258	26	8	34	6	6	6	>ZNF445(-)_GCGCCGACGCGCGTGCGCGA	>ZNF445(-)_GCGCCGACGCGCGTGCGCGACTGGAGCCGCCGGGAGGTAGGCGCGGGA	>ZNF445(-)_ACTGGAGCCGCCGGGAGGTAGGCGCGGGA
chr12	101697671	101697672	CHPT1	66	+	391	72	463	14	190	31	3	34	7	5	9	>CHPT1(+)_GGCCCCGCCCCACCCGCGAG	>CHPT1(+)_GGCCCCGCCCCACCCGCGAGCCGCAGCCGCGGCCCCACAGCTTCTGGG	>CHPT1(+)_GCCGCAGCCGCGGCCCCACAGCTTCTGGG
chr5	179907884	179907885	TBC1D9B	63	-	415	45	460	13	183	32	2	34	7	6	4	>TBC1D9B(-)_GGCCCGCTCCGCACGCTCCG	>TBC1D9B(-)_GGCCCGCTCCGCACGCTCCGCTCCGCACGCTCCGCTCCGGGACGCCGA	>TBC1D9B(-)_GCTCCGCACGCTCCGCTCCGGGACGCCGA
chr22	38700939	38700940	JOSD1	276	-	342	112	454	32	159	29	5	34	13	16	5	>JOSD1(-)_ACGTCGGGCTCAGGTGCGCG	>JOSD1(-)_ACGTCGGGCTCAGGTGCGCGCGCCCGCCCGCACGGCCCAGTTGGCGGC	>JOSD1(-)_GCGCCCGCCCGCACGGCCCAGTTGGCGGC
chr10	28677493	28677494	BAMBI	727	+	279	173	452	48	194	28	6	34	19	8	3	>BAMBI(+)_GGCGGGGCGGTGCAGGCCGG	>BAMBI(+)_GGCGGGGCGGTGCAGGCCGGCTCCCGGCGCGGGGCGCTATTTACGGCG	>BAMBI(+)_GCTCCCGGCGCGGGGCGCTATTTACGGCG
chr11	68039052	68039053	TCIRG1	220	+	270	160	430	64	103	29	5	34	9	10	7	>TCIRG1(+)_AGCGGCGCCTAGTCCCGGGC	>TCIRG1(+)_AGCGGCGCCTAGTCCCGGGCTGGCGGGAGTGCAGTTCTGAGTCCCGCC	>TCIRG1(+)_CTGGCGGGAGTGCAGTTCTGAGTCCCGCC
chr15	90265692	90265693	NGRN	68	+	358	67	425	20	219	32	2	34	9	3	7	>NGRN(+)_ACCCGGCTACTTCCGCTGCT	>NGRN(+)_ACCCGGCTACTTCCGCTGCTGTTTCGTAGCCGACTGCTGAAGGCTGGT	>NGRN(+)_TGTTTCGTAGCCGACTGCTGAAGGCTGGT
chr20	35092806	35092807	TRPC4AP	105	-	291	132	423	267	210	29	5	34	67	48	16	>TRPC4AP(-)_GCCGCCCCGTAGAAATCTCC	>TRPC4AP(-)_GCCGCCCCGTAGAAATCTCCGCGGCCCCGAGGCCGCTTGCTTCCTGTT	>TRPC4AP(-)_CGCGGCCCCGAGGCCGCTTGCTTCCTGTT
chr13	50909790	50909791	RNASEH2B	55	+	359	44	403	7	165	34	0	34	5	7	6	>RNASEH2B(+)_GTCACTCGGCGCCCTGCGGC	>RNASEH2B(+)_GTCACTCGGCGCCCTGCGGCGCGCGATGAGCACCTACCACTAGCGGAG	>RNASEH2B(+)_CGCGCGATGAGCACCTACCACTAGCGGAG
chr18	51030218	51030219	SMAD4	99	+	304	90	394	20	223	28	6	34	11	5	10	>SMAD4(+)_TGAAATTACCCGGATGTGGT	>SMAD4(+)_TGAAATTACCCGGATGTGGTCCCCGCGCGCGCATGCTCAGTGGCTTCT	>SMAD4(+)_TCCCCGCGCGCGCATGCTCAGTGGCTTCT
chr3	48440275	48440276	TMA7	307	+	264	129	393	40	203	29	5	34	11	9	11	>TMA7(+)_AGGGTGGGGCAGACGCTCCG	>TMA7(+)_AGGGTGGGGCAGACGCTCCGTTTCCGGTGGCAGGGTCTGGGGAAGCGG	>TMA7(+)_GTTTCCGGTGGCAGGGTCTGGGGAAGCGG
chr22	50343339	50343340	PPP6R2	181	+	333	60	393	14	192	32	2	34	10	10	13	>PPP6R2(+)_CCGGAGCGCGTGCCCGTGCG	>PPP6R2(+)_CCGGAGCGCGTGCCCGTGCGCCGCCGCCGCCATTTTGGAGCGATCGGA	>PPP6R2(+)_GCCGCCGCCGCCATTTTGGAGCGATCGGA
chr11	77820728	77820729	RSF1	101	-	257	126	383	1	164	31	3	34	2	8	8	>RSF1(-)_ACCACAACTTCCCCCGCCCC	>RSF1(-)_ACCACAACTTCCCCCGCCCCCCCATCGCCTCCTCCTCCATCCTCCAGT	>RSF1(-)_CCCCATCGCCTCCTCCTCCATCCTCCAGT
chr21	44801801	44801802	UBE2G2	99	-	298	77	375	11	211	29	5	34	5	8	9	>UBE2G2(-)_CGCGACGGTGGCCCGGAAGC	>UBE2G2(-)_CGCGACGGTGGCCCGGAAGCAGTCCCCGGTGTCGGGGCAGGAGGCACG	>UBE2G2(-)_CAGTCCCCGGTGTCGGGGCAGGAGGCACG
chr19	49496433	49496434	RPS11	95	+	170	204	374	258	103	28	6	34	66	26	15	>RPS11(+)_CGTAATCGATAAGGAAACCC	>RPS11(+)_CGTAATCGATAAGGAAACCCGGACGCTGCTGCCCCTTTCTTTTTTTCA	>RPS11(+)_CGGACGCTGCTGCCCCTTTCTTTTTTTCA
chr12	105330704	105330705	C12orf75	77	+	321	42	363	2	121	31	3	34	2	22	5	>C12orf75(+)_GGGCCGGGGCGAGGGGTGCC	>C12orf75(+)_GGGCCGGGGCGAGGGGTGCCGGGTGGTTTCCGCCCGGCAGCCCGCAGC	>C12orf75(+)_CGGGTGGTTTCCGCCCGGCAGCCCGCAGC
chr19	4909500	4909501	UHRF1	87	+	203	145	348	151	105	21	13	34	29	63	15	>UHRF1(+)_GCAACTCCCAAATGCCGAGT	>UHRF1(+)_GCAACTCCCAAATGCCGAGTTTTCGCGGGAAAAAAATCAGAGCAGCTG	>UHRF1(+)_TTTTCGCGGGAAAAAAATCAGAGCAGCTG
chr5	271645	271646	PDCD6	179	+	233	110	343	164	166	27	7	34	24	6	3	>PDCD6(+)_CCCCGGAAGTGGTGATAATG	>PDCD6(+)_CCCCGGAAGTGGTGATAATGCCAGGCCCTGCCCCCGGCAGAGGCGGAA	>PDCD6(+)_GCCAGGCCCTGCCCCCGGCAGAGGCGGAA
chr19	5720145	5720146	LONP1	352	-	172	167	339	17	179	28	6	34	24	7	23	>LONP1(-)_CGCGGCGAGCGGAAATGACG	>LONP1(-)_CGCGGCGAGCGGAAATGACGCGAGTTGTGTGAGCCGCCAGTATGGCCG	>LONP1(-)_GCGAGTTGTGTGAGCCGCCAGTATGGCCG
chr17	21214160	21214161	TMEM11	76	-	244	76	320	33	218	28	6	34	5	12	10	>TMEM11(-)_CCGATGCCGCCTTGGCGCGA	>TMEM11(-)_CCGATGCCGCCTTGGCGCGAGACGTTGGCAAGCAGAGTGTCTCCAAGA	>TMEM11(-)_AGACGTTGGCAAGCAGAGTGTCTCCAAGA
chr20	62302996	62302997	ADRM1	70	+	230	77	307	8	161	32	2	34	10	13	15	>ADRM1(+)_CGAACGCGGGTTTCCGGCGG	>ADRM1(+)_CGAACGCGGGTTTCCGGCGGGGCCCGGCAGGCGCCGAGGAGGAAGAGC	>ADRM1(+)_GGGCCCGGCAGGCGCCGAGGAGGAAGAGC
chr14	75127047	75127048	NEK9	54	-	238	62	300	8	195	29	5	34	3	3	2	>NEK9(-)_AACACAGAGAACTGTTTCCG	>NEK9(-)_AACACAGAGAACTGTTTCCGGGTCGGGGGGCAGGAGCCACCATCGAGC	>NEK9(-)_GGGTCGGGGGGCAGGAGCCACCATCGAGC
chr5	71455656	71455657	BDP1	46	+	217	79	296	38	225	32	2	34	12	16	5	>BDP1(+)_GCGGCGTCCTGTGAGCGCGG	>BDP1(+)_GCGGCGTCCTGTGAGCGCGGGGATGCTGGGAGGAGGGTGAAATTTAGC	>BDP1(+)_GGGATGCTGGGAGGAGGGTGAAATTTAGC
chr16	10743850	10743851	NUBP1	13	+	248	34	282	12	221	31	3	34	0	0	1	>NUBP1(+)_AAATGTACGACAGCGGGTTC	>NUBP1(+)_AAATGTACGACAGCGGGTTCCGGTGACCACGAAGGCGGCAAAGGCGAC	>NUBP1(+)_CCGGTGACCACGAAGGCGGCAAAGGCGAC
chr9	37904126	37904127	SLC25A51	65	-	221	51	272	1	177	28	6	34	1	0	0	>SLC25A51(-)_AGCGCGTCGCGCTGCGCCCC	>SLC25A51(-)_AGCGCGTCGCGCTGCGCCCCAACCTCGGGGTCGGTCACAGTCTGCGCC	>SLC25A51(-)_CAACCTCGGGGTCGGTCACAGTCTGCGCC
chr14	89955968	89955969	TDP1	26	+	209	60	269	12	159	28	6	34	1	2	10	>TDP1(+)_GGGCGGGATCCGAGGCAAGC	>TDP1(+)_GGGCGGGATCCGAGGCAAGCGTTGGTTCTGTGCGCCTCAGGTACGTGT	>TDP1(+)_CGTTGGTTCTGTGCGCCTCAGGTACGTGT
chr4	47463701	47463702	COMMD8	69	-	236	9	245	3	221	31	3	34	0	1	3	>COMMD8(-)_CCCCGCCGGCGAGAGTCACG	>COMMD8(-)_CCCCGCCGGCGAGAGTCACGTGGGCGAGTCGTAGCTTTAGACAAGCGG	>COMMD8(-)_GTGGGCGAGTCGTAGCTTTAGACAAGCGG
chr6	11093819	11093820	SMIM13	112	+	181	46	227	13	159	28	6	34	5	5	2	>SMIM13(+)_CGGAGGAGGCGAGCTTGGTG	>SMIM13(+)_CGGAGGAGGCGAGCTTGGTGATGAGCTGCCCCAGCGGTAGGGGGCCTG	>SMIM13(+)_GATGAGCTGCCCCAGCGGTAGGGGGCCTG
chr3	49723949	49723950	GMPPB	61	-	146	69	215	12	157	30	4	34	3	1	5	>GMPPB(-)_GCGGTGGTCGCGTCACTGCC	>GMPPB(-)_GCGGTGGTCGCGTCACTGCCCGCGCCGGGTCCGGCCTGAGTTCGGGGC	>GMPPB(-)_CCGCGCCGGGTCCGGCCTGAGTTCGGGGC
chr14	23321461	23321462	PABPN1	102	+	128	81	209	30	89	30	4	34	15	4	1	>PABPN1(+)_GCGCAGCTCTCCAATCGCCG	>PABPN1(+)_GCGCAGCTCTCCAATCGCCGGGCGGCGGGCCCCAGTCTGAGCGGCGAT	>PABPN1(+)_GGGCGGCGGGCCCCAGTCTGAGCGGCGAT
chr10	73772306	73772307	FUT11	25	+	171	36	207	12	81	33	1	34	6	2	2	>FUT11(+)_CGGTCACGACTATCCGCTGG	>FUT11(+)_CGGTCACGACTATCCGCTGGGCGGGGTCGGTGCTGGCCGAGGGGGCGC	>FUT11(+)_GGCGGGGTCGGTGCTGGCCGAGGGGGCGC
chr10	128126388	128126389	MKI67	7	-	170	30	200	0	141	31	3	34	0	0	4	>MKI67(-)_TGGAAGAAGGAAGTGGAGGG	>MKI67(-)_TGGAAGAAGGAAGTGGAGGGCTGACGCTGCGGGCGGGCGGGCGGGCGG	>MKI67(-)_GCTGACGCTGCGGGCGGGCGGGCGGGCGG
chr21	33266366	33266367	IL10RB	72	+	148	51	199	0	165	28	6	34	0	0	1	>IL10RB(+)_AGCCCGGTCGCCCGGCCCCT	>IL10RB(+)_AGCCCGGTCGCCCGGCCCCTCCCCACCCCGCCCCGCCCATCTCCGCTG	>IL10RB(+)_TCCCCACCCCGCCCCGCCCATCTCCGCTG
chr6	89638741	89638742	LYRM2	60	-	165	24	189	8	228	31	3	34	4	1	2	>LYRM2(-)_CACCCCTTGGTCGAACCCCA	>LYRM2(-)_CACCCCTTGGTCGAACCCCACTTCCGCTCCTGCGCGCTGAGGCTCCGG	>LYRM2(-)_ACTTCCGCTCCTGCGCGCTGAGGCTCCGG
chr2	108786778	108786779	CCDC138	14	+	100	48	148	3	165	31	3	34	2	0	3	>CCDC138(+)_CGTCGTGACGCACTGCGGCC	>CCDC138(+)_CGTCGTGACGCACTGCGGCCGCGTAGCGCCGCGGGTTTGATGAACGCG	>CCDC138(+)_CGCGTAGCGCCGCGGGTTTGATGAACGCG
chr19	55385933	55385934	RPL28	168	+	314	777	1091	732	119	22	11	33	165	97	32	>RPL28(+)_TACGGTATTAAAGGCGTCGC	>RPL28(+)_TACGGTATTAAAGGCGTCGCCTCGCCCCTCGCCTTCCTCTTTCCGTCT	>RPL28(+)_CCTCGCCCCTCGCCTTCCTCTTTCCGTCT
chr1	32336232	32336233	MARCKSL1	1623	-	391	583	974	747	66	21	12	33	54	211	22	>MARCKSL1(-)_CGGGCGCTTATATATAGGCA	>MARCKSL1(-)_CGGGCGCTTATATATAGGCAGCTCGGCGGGCGGCGGGCGGCATTCTGG	>MARCKSL1(-)_AGCTCGGCGGGCGGCGGGCGGCATTCTGG
chr17	75154511	75154512	JPT1	986	-	480	406	886	306	176	28	5	33	29	109	32	>JPT1(-)_AAAACCCTATAAAGGCGTCG	>JPT1(-)_AAAACCCTATAAAGGCGTCGATCGGCCGGACAGGCGGCAGCGGCGGCT	>JPT1(-)_GATCGGCCGGACAGGCGGCAGCGGCGGCT
chr8	58553260	58553261	SDCBP	2363	+	330	516	846	154	151	18	15	33	27	16	9	>SDCBP(+)_CACCGCTCTCTTACACTCGG	>SDCBP(+)_CACCGCTCTCTTACACTCGGGCCTCAGAAGTCCGTGCCAGTGACCGGA	>SDCBP(+)_GGCCTCAGAAGTCCGTGCCAGTGACCGGA
chr19	33302533	33302534	CEBPA	1207	-	590	164	754	188	110	30	3	33	21	100	27	>CEBPA(-)_CTGCCGGGTATAAAAGCTGG	>CEBPA(-)_CTGCCGGGTATAAAAGCTGGGCCGGCGCGGGCCGGGCCATTCGCGACC	>CEBPA(-)_GGCCGGCGCGGGCCGGGCCATTCGCGACC
chr11	45847486	45847487	CRY2	168	+	501	196	697	7	222	29	4	33	3	32	9	>CRY2(+)_TACCGGGGCGGAGCGGGGGT	>CRY2(+)_TACCGGGGCGGAGCGGGGGTGGCTGGAGCAGTCTGGACAGTCATGGCG	>CRY2(+)_TGGCTGGAGCAGTCTGGACAGTCATGGCG
chr5	74685232	74685233	HEXB	323	+	525	160	685	67	149	27	6	33	22	17	8	>HEXB(+)_GCCGGGCGGGAAGTCGGGTC	>HEXB(+)_GCCGGGCGGGAAGTCGGGTCCCGAGGCTCCGGCTCGGCAGACCGGGCG	>HEXB(+)_CCCGAGGCTCCGGCTCGGCAGACCGGGCG
chr15	90529922	90529923	CRTC3	34	+	568	79	647	9	203	31	2	33	2	6	0	>CRTC3(+)_CACGGGGGCGGACCTCGGCG	>CRTC3(+)_CACGGGGGCGGACCTCGGCGCGCTCCCGGCCGCTCGCTGGCTCCGGGG	>CRTC3(+)_GCGCTCCCGGCCGCTCGCTGGCTCCGGGG
chr1	203007395	203007396	TMEM183A	71	+	503	133	636	37	179	32	1	33	11	3	5	>TMEM183A(+)_AACCCGGACCTATGTTCTCG	>TMEM183A(+)_AACCCGGACCTATGTTCTCGCGAGAGTTAGCGGCCTCCGGTGTGGGAT	>TMEM183A(+)_GCGAGAGTTAGCGGCCTCCGGTGTGGGAT
chr1	36156167	36156168	MAP7D1	75	+	377	258	635	22	109	26	7	33	4	30	20	>MAP7D1(+)_GGCCAGGCCCAGCCCGGGCG	>MAP7D1(+)_GGCCAGGCCCAGCCCGGGCGGTACAATAGGGTTGGGCCGAGGCCGGGA	>MAP7D1(+)_GGTACAATAGGGTTGGGCCGAGGCCGGGA
chr3	41199504	41199505	CTNNB1	1237	+	348	279	627	166	117	23	10	33	16	73	10	>CTNNB1(+)_TGCGCGACTTATAAGAGCTC	>CTNNB1(+)_TGCGCGACTTATAAGAGCTCCTTGTGCGGCGCCATTTTAAGCCTCTCG	>CTNNB1(+)_CCTTGTGCGGCGCCATTTTAAGCCTCTCG
chr22	40636678	40636679	MRTFA	115	-	538	86	624	49	213	30	3	33	11	36	18	>MRTFA(-)_GCCCGCAGCTTCCGTGGCTG	>MRTFA(-)_GCCCGCAGCTTCCGTGGCTGAGAGGAGCCGGCGGCGGCAGTGTCTGTG	>MRTFA(-)_GAGAGGAGCCGGCGGCGGCAGTGTCTGTG
chr20	32207920	32207921	POFUT1	151	+	535	89	624	21	125	28	5	33	3	3	4	>POFUT1(+)_CGCGTCCCTCCTTCCCTCCC	>POFUT1(+)_CGCGTCCCTCCTTCCCTCCCCGACTGTGCGCCGCGGCTGGCTCGGGTT	>POFUT1(+)_CCGACTGTGCGCCGCGGCTGGCTCGGGTT
chr15	23039568	23039569	TUBGCP5	418	-	442	170	612	27	222	30	3	33	2	12	4	>TUBGCP5(-)_AGGAGCCCGAGCTCTCGCGC	>TUBGCP5(-)_AGGAGCCCGAGCTCTCGCGCGACAGGCACCAATTCGTTAGACGCGCGC	>TUBGCP5(-)_CGACAGGCACCAATTCGTTAGACGCGCGC
chr9	94030812	94030813	PTPDC1	142	+	570	39	609	14	212	33	0	33	0	3	2	>PTPDC1(+)_TGTGGCGGCTGACATTGGCG	>PTPDC1(+)_TGTGGCGGCTGACATTGGCGGGCGGGCGCGCTGAGGGCAGCGCCGGGG	>PTPDC1(+)_GGGCGGGCGCGCTGAGGGCAGCGCCGGGG
chr15	60592525	60592526	RORA	134	-	382	225	607	103	172	26	7	33	9	32	19	>RORA(-)_AGCCTCTTATGGCTCGGGAT	>RORA(-)_AGCCTCTTATGGCTCGGGATGGCTCTCGGCGGGCGGGCAGCTGCGGCA	>RORA(-)_TGGCTCTCGGCGGGCGGGCAGCTGCGGCA
chr11	819571	819572	PNPLA2	1668	+	385	217	602	332	177	27	6	33	28	201	52	>PNPLA2(+)_TCCCACACTTAAAAGCGCCG	>PNPLA2(+)_TCCCACACTTAAAAGCGCCGCCTCCGCGCCGCCCGCGTAGCTTCTTCG	>PNPLA2(+)_GCCTCCGCGCCGCCCGCGTAGCTTCTTCG
chr8	38787233	38787234	TACC1	137	+	360	223	583	93	151	25	8	33	16	27	4	>TACC1(+)_CCGGCGGCAGCTGATGCGCG	>TACC1(+)_CCGGCGGCAGCTGATGCGCGCCCCGCCGGCCGGGAGGCGGGAGTCCGC	>TACC1(+)_GCCCCGCCGGCCGGGAGGCGGGAGTCCGC
chr7	74174357	74174358	EIF4H	227	+	368	207	575	266	200	28	5	33	34	12	4	>EIF4H(+)_GGGGGAGTTATATTGCGGGG	>EIF4H(+)_GGGGGAGTTATATTGCGGGGTCCTTCCTCGCTCACCCTGGTTCCTCTC	>EIF4H(+)_GTCCTTCCTCGCTCACCCTGGTTCCTCTC
chr10	119178811	119178812	PRDX3	80	-	419	147	566	24	271	30	3	33	5	27	33	>PRDX3(-)_CACCCCGTAGGCCCCGCCCC	>PRDX3(-)_CACCCCGTAGGCCCCGCCCCTGCGTCTCTGCCCGCCCCGTGGCGCCCG	>PRDX3(-)_CTGCGTCTCTGCCCGCCCCGTGGCGCCCG
chr1	230868524	230868525	C1orf198	166	-	421	144	565	25	217	24	9	33	12	7	8	>C1orf198(-)_CGGGCACAGCGAGGGGCGGG	>C1orf198(-)_CGGGCACAGCGAGGGGCGGGGCGCGGGCCGGGAGCGGCGGGCAGGCCG	>C1orf198(-)_GGCGCGGGCCGGGAGCGGCGGGCAGGCCG
chr14	49620800	49620801	MGAT2	283	+	268	293	561	63	168	28	5	33	6	12	10	>MGAT2(+)_AGGGGTGTGGGCCGGAGGGC	>MGAT2(+)_AGGGGTGTGGGCCGGAGGGCCGCGGTGTGCCGCGGGGCAGTTGCGGGT	>MGAT2(+)_CCGCGGTGTGCCGCGGGGCAGTTGCGGGT
chr17	37407139	37407140	ACACA	297	-	485	76	561	18	131	27	6	33	3	7	0	>ACACA(-)_CCCGGGGTCAGGCCCGGCCC	>ACACA(-)_CCCGGGGTCAGGCCCGGCCCCACACCGCCCTCCCCCACAGAGCGGCGA	>ACACA(-)_CCACACCGCCCTCCCCCACAGAGCGGCGA
chr22	43187090	43187091	TTLL12	141	-	481	69	550	15	150	32	1	33	2	6	0	>TTLL12(-)_CGACGGACGGCGGGCGGCGG	>TTLL12(-)_CGACGGACGGCGGGCGGCGGCGGCGGTGGCGGCGCTGGAGTCGGCGCG	>TTLL12(-)_GCGGCGGTGGCGGCGCTGGAGTCGGCGCG
chr9	96450178	96450179	HABP4	68	+	417	126	543	19	212	26	7	33	7	13	6	>HABP4(+)_GCGGGCGCCGGTAGGGGCCG	>HABP4(+)_GCGGGCGCCGGTAGGGGCCGGACAGGGTAGGGCCCGGAGGGCGGTGGC	>HABP4(+)_GGACAGGGTAGGGCCCGGAGGGCGGTGGC
chr16	75464668	75464669	TMEM170A	57	-	490	48	538	5	202	31	2	33	2	13	8	>TMEM170A(-)_AGGACCCCGGCTGGAGGTGA	>TMEM170A(-)_AGGACCCCGGCTGGAGGTGACGCTGAGGCGGCGAGGGTGAGTCGGCGC	>TMEM170A(-)_ACGCTGAGGCGGCGAGGGTGAGTCGGCGC
chr16	66830922	66830923	NAE1	139	-	414	123	537	11	218	32	1	33	1	13	8	>NAE1(-)_TTGTGGAGCTGGTGGCGGCG	>NAE1(-)_TTGTGGAGCTGGTGGCGGCGCTCCGCAGGGGCTCGGCTGTTTTCCGCG	>NAE1(-)_GCTCCGCAGGGGCTCGGCTGTTTTCCGCG
chr19	57499934	57499935	ZNF773	374	+	450	83	533	88	181	29	4	33	16	14	7	>ZNF773(+)_TTCGCTGCCCTCAAGAGAAC	>ZNF773(+)_TTCGCTGCCCTCAAGAGAACTCAGCTTGCCGGAAGCTGGTTGTTCGCT	>ZNF773(+)_CTCAGCTTGCCGGAAGCTGGTTGTTCGCT
chr17	48944810	48944811	SNF8	150	-	458	61	519	11	201	32	1	33	12	19	21	>SNF8(-)_GGCGCGTGCAGATGACGCGC	>SNF8(-)_GGCGCGTGCAGATGACGCGCGGCTCGGGCTTCCGCCTTGGGGAGCCGG	>SNF8(-)_CGGCTCGGGCTTCCGCCTTGGGGAGCCGG
chr3	10141779	10141780	VHL	122	+	414	93	507	12	161	29	4	33	3	2	0	>VHL(+)_CGCGAAGACTACGGAGGTCG	>VHL(+)_CGCGAAGACTACGGAGGTCGACTCGGGAGCGCGCACGCAGCTCCGCCC	>VHL(+)_GACTCGGGAGCGCGCACGCAGCTCCGCCC
chr12	55729008	55729009	CD63	1359	-	311	192	503	31	98	31	2	33	19	8	7	>CD63(-)_CCGCGCGGCAGGCGGGGCGG	>CD63(-)_CCGCGCGGCAGGCGGGGCGGGAGCCGGGGGGCGCAGCTAGAGAGCCCC	>CD63(-)_GGAGCCGGGGGGCGCAGCTAGAGAGCCCC
chr3	97972415	97972416	RIOX2	477	-	392	105	497	6	199	32	1	33	4	1	3	>RIOX2(-)_CCCACGCTGCCCCGCCTCCA	>RIOX2(-)_CCCACGCTGCCCCGCCTCCAGCCGCTGCGCCGCAACGCAGTGGGCTCG	>RIOX2(-)_AGCCGCTGCGCCGCAACGCAGTGGGCTCG
chr8	123241376	123241377	C8orf76	81	-	399	91	490	24	199	29	4	33	8	1	1	>C8orf76(-)_TCTGGGCCGTGGAAGCCCCG	>C8orf76(-)_TCTGGGCCGTGGAAGCCCCGCCTTTTCCGGCGGGCCCCGCTTCCTCGT	>C8orf76(-)_GCCTTTTCCGGCGGGCCCCGCTTCCTCGT
chr3	197960241	197960242	LMLN	20	+	434	54	488	7	202	32	1	33	4	4	5	>LMLN(+)_AGAGGCGTCACGCACTCCAT	>LMLN(+)_AGAGGCGTCACGCACTCCATGGTAACGACGCTCGGCCCGAAGATGGCG	>LMLN(+)_TGGTAACGACGCTCGGCCCGAAGATGGCG
chr10	103193271	103193272	NT5C2	1279	-	308	179	487	56	121	25	8	33	17	12	7	>NT5C2(-)_GCGGGGGCGGGGAGGGCGCG	>NT5C2(-)_GCGGGGGCGGGGAGGGCGCGCGTTGAGGCGGCTGCGGCAGTTGCGCGC	>NT5C2(-)_GCGTTGAGGCGGCTGCGGCAGTTGCGCGC
chr21	46098151	46098152	COL6A2	235	+	338	148	486	33	157	28	5	33	6	5	8	>COL6A2(+)_CTGCTGCTTACTCGGCGCCC	>COL6A2(+)_CTGCTGCTTACTCGGCGCCCGCGCCTCGGGCCGTCGGGAGCGGAGCCT	>COL6A2(+)_CGCGCCTCGGGCCGTCGGGAGCGGAGCCT
chr12	105236092	105236093	APPL2	256	-	419	66	485	8	137	31	2	33	3	3	6	>APPL2(-)_GCCGCGGGCACGGAGTGGCC	>APPL2(-)_GCCGCGGGCACGGAGTGGCCGCCGCGTCGCCTGAGCCCAGAGCCGGGG	>APPL2(-)_CGCCGCGTCGCCTGAGCCCAGAGCCGGGG
chr1	64966496	64966497	JAK1	976	-	392	93	485	8	150	25	8	33	4	7	3	>JAK1(-)_AGGCCGCGGCGGCCGCGGAG	>JAK1(-)_AGGCCGCGGCGGCCGCGGAGTATCCTGGAGCTGCAGACAGTGCGGGCC	>JAK1(-)_GTATCCTGGAGCTGCAGACAGTGCGGGCC
chr13	94601877	94601878	GPR180	73	+	418	65	483	13	192	31	2	33	1	12	10	>GPR180(+)_CCCACCCCGCCTCCCCCAGC	>GPR180(+)_CCCACCCCGCCTCCCCCAGCTGCCGACGTGGGGCGGGCAGCCGCCGGC	>GPR180(+)_CTGCCGACGTGGGGCGGGCAGCCGCCGGC
chr2	210476710	210476711	LANCL1	66	-	337	139	476	27	208	29	4	33	3	6	0	>LANCL1(-)_CCCTTCTGTTACTGTCCGGG	>LANCL1(-)_CCCTTCTGTTACTGTCCGGGGCTGCGGGGTGAGAGGCCAGGGCCGAGA	>LANCL1(-)_GGCTGCGGGGTGAGAGGCCAGGGCCGAGA
chr3	28241623	28241624	CMC1	77	+	325	144	469	4	219	28	5	33	4	0	2	>CMC1(+)_AAAGGCGCAGGCGCAACGGG	>CMC1(+)_AAAGGCGCAGGCGCAACGGGCGGCGGAAGTAGGAGCCTGGGAAGGAAG	>CMC1(+)_GCGGCGGAAGTAGGAGCCTGGGAAGGAAG
chr4	4248220	4248221	TMEM128	234	-	357	107	464	14	241	31	2	33	12	2	5	>TMEM128(-)_GACGCCGGAAGCGCTGTGTC	>TMEM128(-)_GACGCCGGAAGCGCTGTGTCTGACGTCACTTCCGTCGCATTTCGGGGC	>TMEM128(-)_CTGACGTCACTTCCGTCGCATTTCGGGGC
chr13	27251557	27251558	RPL21	88	+	207	256	463	286	168	22	11	33	54	32	8	>RPL21(+)_AGGCCCTTGTAAGGCGCGCG	>RPL21(+)_AGGCCCTTGTAAGGCGCGCGCCGCGGCCCCGCCTCTTTCCTTTCGGCC	>RPL21(+)_GCCGCGGCCCCGCCTCTTTCCTTTCGGCC
chr8	38105528	38105529	ASH2L	139	+	366	88	454	3	226	32	1	33	3	7	13	>ASH2L(+)_CACACAGCAACGCGCGCGAG	>ASH2L(+)_CACACAGCAACGCGCGCGAGAGAAGAGAGTATTCTCGCGAGAAGTCCA	>ASH2L(+)_GAGAAGAGAGTATTCTCGCGAGAAGTCCA
chr11	70398540	70398541	CTTN	157	+	370	80	450	16	209	29	4	33	4	5	4	>CTTN(+)_CCGGATGCGGCCCCGCCCCC	>CTTN(+)_CCGGATGCGGCCCCGCCCCCGCCCTCGGAACCGGAAGTAGAGCCTGGT	>CTTN(+)_CGCCCTCGGAACCGGAAGTAGAGCCTGGT
chr9	120793390	120793391	FBXW2	70	-	372	76	448	9	188	26	7	33	3	4	6	>FBXW2(-)_GCGGAGATGACGCAGGCAGC	>FBXW2(-)_GCGGAGATGACGCAGGCAGCACCGGAAGCCGCTCCCCTGTGAGGCTGC	>FBXW2(-)_CACCGGAAGCCGCTCCCCTGTGAGGCTGC
chr3	48685892	48685893	NCKIPSD	158	-	396	51	447	0	255	33	0	33	1	0	2	>NCKIPSD(-)_GCGCGCGCGCGCCTGCGTAG	>NCKIPSD(-)_GCGCGCGCGCGCCTGCGTAGTGTGTCACGGGGCGGGACAACCGCGGCG	>NCKIPSD(-)_GTGTGTCACGGGGCGGGACAACCGCGGCG
chr2	27071649	27071650	OST4	180	-	322	115	437	28	187	29	4	33	7	16	5	>OST4(-)_GCCTGAGCTGGCGCTACGAA	>OST4(-)_GCCTGAGCTGGCGCTACGAAGTTCCGGTCCAGGTCTCTGACTTCGGGC	>OST4(-)_AGTTCCGGTCCAGGTCTCTGACTTCGGGC
chr22	18001500	18001501	MICAL3	130	-	324	113	437	27	191	30	3	33	7	1	7	>MICAL3(-)_CCGCCCTTCCATGTGCCCGC	>MICAL3(-)_CCGCCCTTCCATGTGCCCGCCCATCCCCCGGCTGCGCCGCTTCTCCGG	>MICAL3(-)_CCCATCCCCCGGCTGCGCCGCTTCTCCGG
chr11	75815217	75815218	UVRAG	129	+	302	130	432	37	184	28	5	33	5	76	42	>UVRAG(+)_GGTCTCAGCGGGGTGGAGGG	>UVRAG(+)_GGTCTCAGCGGGGTGGAGGGGTTGCACTGCGGTAATATGGCTCTTCCT	>UVRAG(+)_GGTTGCACTGCGGTAATATGGCTCTTCCT
chr16	2048007	2048008	TSC2	61	+	370	62	432	1	195	30	3	33	2	6	11	>TSC2(+)_GGAAGTGCGGGTCGCGCTTC	>TSC2(+)_GGAAGTGCGGGTCGCGCTTCCGGCGGCGTCCCGGGGCCAGGGGGGTGC	>TSC2(+)_CCGGCGGCGTCCCGGGGCCAGGGGGGTGC
chr3	14178578	14178579	XPC	121	-	271	158	429	14	145	30	3	33	1	15	11	>XPC(-)_CGCGGCCGGGTGCGTCACTC	>XPC(-)_CGCGGCCGGGTGCGTCACTCGCGAAGTGGAATTTGCCCAGACAAGCAA	>XPC(-)_CGCGAAGTGGAATTTGCCCAGACAAGCAA
chr2	127294143	127294144	ERCC3	239	-	338	84	422	21	208	30	3	33	10	11	4	>ERCC3(-)_ACAACAGGGAGCTTCCGGAT	>ERCC3(-)_ACAACAGGGAGCTTCCGGATTGAGCCGGAAGTCCCCCCAGAGCGGATG	>ERCC3(-)_TTGAGCCGGAAGTCCCCCCAGAGCGGATG
chr9	128829793	128829794	SPOUT1	41	-	339	82	421	16	225	31	2	33	5	0	4	>SPOUT1(-)_CGGAAGAGGCGAGTCTCATT	>SPOUT1(-)_CGGAAGAGGCGAGTCTCATTGGCAGAGGCGGGACCGACGGTGTGTGCG	>SPOUT1(-)_TGGCAGAGGCGGGACCGACGGTGTGTGCG
chr17	81666604	81666605	OXLD1	144	-	345	74	419	18	201	25	8	33	13	3	7	>OXLD1(-)_AGGTCCGGGATTGGCCGGAG	>OXLD1(-)_AGGTCCGGGATTGGCCGGAGCGCCCGCCGCTCACGGTCAGGGGTTGCC	>OXLD1(-)_GCGCCCGCCGCTCACGGTCAGGGGTTGCC
chr6	34392646	34392647	NUDT3	57	-	346	67	413	17	175	32	1	33	4	19	8	>NUDT3(-)_AGGCCGGTGCAGCCTTACGC	>NUDT3(-)_AGGCCGGTGCAGCCTTACGCCGCTGACGCATCGCGCCCAAGATGGCGG	>NUDT3(-)_CCGCTGACGCATCGCGCCCAAGATGGCGG
chr10	73252624	73252625	MRPS16	29	-	311	99	410	14	226	31	2	33	5	3	3	>MRPS16(-)_GAGGCGTGGCGAGCGGATCA	>MRPS16(-)_GAGGCGTGGCGAGCGGATCATCCGCTTCCGGAGTCGAGGTTTTCGGGC	>MRPS16(-)_ATCCGCTTCCGGAGTCGAGGTTTTCGGGC
chr17	45490737	45490738	PLEKHM1	85	-	260	150	410	7	192	31	2	33	1	10	5	>PLEKHM1(-)_TGATGGCGTCAGGGGCCGGG	>PLEKHM1(-)_TGATGGCGTCAGGGGCCGGGGCGCCGCTTCCTGTTGTCAGTGGCCGAG	>PLEKHM1(-)_GGCGCCGCTTCCTGTTGTCAGTGGCCGAG
chr2	241637060	241637061	THAP4	106	-	341	69	410	3	125	26	7	33	4	3	1	>THAP4(-)_GCGCTCCCTCCCTCGGGGCG	>THAP4(-)_GCGCTCCCTCCCTCGGGGCGGTCCGCGGGCGGGCGGGCGGCTAGGGCC	>THAP4(-)_GGTCCGCGGGCGGGCGGGCGGCTAGGGCC
chr7	99325909	99325910	ARPC1A	111	+	278	130	408	9	210	29	4	33	5	1	5	>ARPC1A(+)_CACTTCCGGGATCTGTCAGC	>ARPC1A(+)_CACTTCCGGGATCTGTCAGCCGCTCCCTCTGGGCTTCCGTCCTCCGCC	>ARPC1A(+)_CCGCTCCCTCTGGGCTTCCGTCCTCCGCC
chr19	18323054	18323055	LSM4	116	-	297	109	406	21	155	27	6	33	5	11	9	>LSM4(-)_CGGCGACGACCGCCGGGAGC	>LSM4(-)_CGGCGACGACCGCCGGGAGCGTGTGCAGCGGCGGCGGCGGAAGTGGCC	>LSM4(-)_CGTGTGCAGCGGCGGCGGCGGAAGTGGCC
chr17	78378648	78378649	PGS1	176	+	299	107	406	20	224	29	4	33	3	7	10	>PGS1(+)_CTTTGTCAATAAAGTTCGCG	>PGS1(+)_CTTTGTCAATAAAGTTCGCGCCCGCCGGGAGCGGAAGCGGAAGCGGCG	>PGS1(+)_GCCCGCCGGGAGCGGAAGCGGAAGCGGCG
chr3	48609645	48609646	UQCRC1	48	-	279	120	399	25	188	32	1	33	7	6	8	>UQCRC1(-)_CCGCGACCGCCAACGCGCCC	>UQCRC1(-)_CCGCGACCGCCAACGCGCCCAGTCTACGCTTGCGCGGCGCAACAGGGC	>UQCRC1(-)_CAGTCTACGCTTGCGCGGCGCAACAGGGC
chr19	29213144	29213145	UQCRFS1	38	-	267	132	399	5	119	29	4	33	5	7	3	>UQCRFS1(-)_CGCGCCTGCGCCGTGGTTGG	>UQCRFS1(-)_CGCGCCTGCGCCGTGGTTGGAAGGTCGTCCCTGTGACCGGCTTGGCGG	>UQCRFS1(-)_GAAGGTCGTCCCTGTGACCGGCTTGGCGG
chr4	146175745	146175746	LSM6	70	+	291	102	393	14	237	31	2	33	2	5	4	>LSM6(+)_AGAAAAGTGCCCCTGCCTCG	>LSM6(+)_AGAAAAGTGCCCCTGCCTCGGCGCTTTCGGTTTTGGCTGGGATCATCC	>LSM6(+)_GGCGCTTTCGGTTTTGGCTGGGATCATCC
chr6	28923984	28923985	TRIM27	37	-	290	103	393	12	192	29	4	33	7	3	5	>TRIM27(-)_CGCGAGCCGCCTCTTCCGCT	>TRIM27(-)_CGCGAGCCGCCTCTTCCGCTCGCGCTGGGGTGGGGTTTACGCTGCCGC	>TRIM27(-)_TCGCGCTGGGGTGGGGTTTACGCTGCCGC
chr22	39532765	39532766	RPS19BP1	284	-	297	95	392	16	130	26	7	33	4	3	2	>RPS19BP1(-)_GCCGAGACGACAGGGACTGC	>RPS19BP1(-)_GCCGAGACGACAGGGACTGCCAGGTCGGAAGTAGTGTGAGGCTCGTGG	>RPS19BP1(-)_CCAGGTCGGAAGTAGTGTGAGGCTCGTGG
chr19	32581189	32581190	PDCD5	295	+	303	75	378	19	193	29	4	33	3	4	8	>PDCD5(+)_CTGGATTGGTGGCGCCTGGG	>PDCD5(+)_CTGGATTGGTGGCGCCTGGGCCCCGCGAGCGCCTGCGCAGTGGTCAAG	>PDCD5(+)_GCCCCGCGAGCGCCTGCGCAGTGGTCAAG
chr3	49940151	49940152	RBM6	58	+	314	63	377	53	152	28	5	33	15	21	17	>RBM6(+)_CCTTTGTGGTAGCAGTGGCC	>RBM6(+)_CCTTTGTGGTAGCAGTGGCCCCGCGCGGAGGAAGTTCCGGTGTCCGCG	>RBM6(+)_CCCGCGCGGAGGAAGTTCCGGTGTCCGCG
chr12	130872095	130872096	RAN	113	+	272	104	376	148	145	33	0	33	11	22	6	>RAN(+)_CGGCGTTTGAATTGCGCTTC	>RAN(+)_CGGCGTTTGAATTGCGCTTCCGCCATCTTTCCAGCCTCAGTCGGACGG	>RAN(+)_CCGCCATCTTTCCAGCCTCAGTCGGACGG
chr9	137578896	137578897	DPH7	50	-	302	72	374	6	250	28	5	33	5	5	11	>DPH7(-)_CCCCGGAAGGAGTCGCGAGA	>DPH7(-)_CCCCGGAAGGAGTCGCGAGAGAGGCGGCCCGCGCTGACGGTGTCCCTG	>DPH7(-)_AGAGGCGGCCCGCGCTGACGGTGTCCCTG
chr20	3046051	3046052	MRPS26	124	+	276	95	371	19	200	27	6	33	9	5	6	>MRPS26(+)_GCTTCCGGGGCACGGTGGCG	>MRPS26(+)_GCTTCCGGGGCACGGTGGCGTCCCGGCACCGCGGCCGCAGTGAGGAGA	>MRPS26(+)_GTCCCGGCACCGCGGCCGCAGTGAGGAGA
chr22	40951380	40951381	RBX1	93	+	307	63	370	9	268	31	2	33	10	4	9	>RBX1(+)_AAGTGTGCGCTGCTGCGCAG	>RBX1(+)_AAGTGTGCGCTGCTGCGCAGGCGCGGTGGTCGGACGACAGACCGTGTG	>RBX1(+)_GGCGCGGTGGTCGGACGACAGACCGTGTG
chr9	34179041	34179042	UBAP1	64	+	264	102	366	28	244	25	8	33	7	23	13	>UBAP1(+)_CAGACGCCCAAATGAGTGGG	>UBAP1(+)_CAGACGCCCAAATGAGTGGGGCGGTGAGGGGAAGGAGGAGGGAAGTAG	>UBAP1(+)_GGCGGTGAGGGGAAGGAGGAGGGAAGTAG
chr5	179698976	179698977	CANX	114	+	249	110	359	43	107	25	8	33	7	41	16	>CANX(+)_TTCGTGCGGTGGGGCTCGCT	>CANX(+)_TTCGTGCGGTGGGGCTCGCTCGCGCGGCAGCGGTGGCCGAGGCCTCTT	>CANX(+)_TCGCGCGGCAGCGGTGGCCGAGGCCTCTT
chr20	59032301	59032302	ATP5F1E	132	-	295	64	359	23	187	31	2	33	5	17	8	>ATP5F1E(-)_CTGATCTTCCTGCGGCTGAA	>ATP5F1E(-)_CTGATCTTCCTGCGGCTGAACCGCCCGGCTGAGCCGACATTGCCGGCG	>ATP5F1E(-)_ACCGCCCGGCTGAGCCGACATTGCCGGCG
chr17	81552352	81552353	FAAP100	56	-	275	77	352	78	181	30	3	33	24	26	16	>FAAP100(-)_TCCGAGGCGGAGCCGCCGCC	>FAAP100(-)_TCCGAGGCGGAGCCGCCGCCGCGCGGCCGGGGCTTCTCACTCTGACGG	>FAAP100(-)_CGCGCGGCCGGGGCTTCTCACTCTGACGG
chr1	1399335	1399336	CCNL2	99	-	255	91	346	39	172	26	7	33	6	17	15	>CCNL2(-)_TGGCGGCCGTGGAGCTTCGC	>CCNL2(-)_TGGCGGCCGTGGAGCTTCGCGAGGAGCCGCCCTGAGGGAAGAAGCCGA	>CCNL2(-)_CGAGGAGCCGCCCTGAGGGAAGAAGCCGA
chr6	87702256	87702257	AKIRIN2	244	-	233	106	339	28	151	29	4	33	14	13	8	>AKIRIN2(-)_GCCGCCGGATTTGAATCGGC	>AKIRIN2(-)_GCCGCCGGATTTGAATCGGCGGCGTTGTTATTGACGCCATATTGGGGC	>AKIRIN2(-)_CGGCGTTGTTATTGACGCCATATTGGGGC
chr1	202889068	202889069	RABIF	57	-	325	12	337	25	130	33	0	33	6	5	7	>RABIF(-)_GCAGCGGCGATGGAACCAGC	>RABIF(-)_GCAGCGGCGATGGAACCAGCGGAGCAGCCGAGCGAGTTAGTGTCAGCC	>RABIF(-)_CGGAGCAGCCGAGCGAGTTAGTGTCAGCC
chr4	183659292	183659293	TRAPPC11	43	+	253	79	332	15	212	32	1	33	4	3	1	>TRAPPC11(+)_ACTCAGGCCCAGAAAGTGCT	>TRAPPC11(+)_ACTCAGGCCCAGAAAGTGCTTCCTGTGCCGGGGGAGGTGGGTACAGGG	>TRAPPC11(+)_TTCCTGTGCCGGGGGAGGTGGGTACAGGG
chr1	42335231	42335232	FOXJ3	235	-	239	92	331	21	263	31	2	33	7	1	0	>FOXJ3(-)_TGGCGGCGAGGGCGGGCGGG	>FOXJ3(-)_TGGCGGCGAGGGCGGGCGGGGGATGCGGGTCGGGAAGTAGTTCCGGGT	>FOXJ3(-)_GGGATGCGGGTCGGGAAGTAGTTCCGGGT
chr17	32444520	32444521	PSMD11	76	+	273	46	319	2	216	27	6	33	5	6	7	>PSMD11(+)_GCGTCGGCGGCCGCGGCCGG	>PSMD11(+)_GCGTCGGCGGCCGCGGCCGGGGACGGTGTGAGAGCGGTAAGATGGCGG	>PSMD11(+)_GGGACGGTGTGAGAGCGGTAAGATGGCGG
chr11	62591522	62591523	TUT1	137	-	193	120	313	69	198	28	5	33	11	8	0	>TUT1(-)_GCGCGTTGAGCTTTGGCGAA	>TUT1(-)_GCGCGTTGAGCTTTGGCGAAGTGGGTTCCGGTGGTGGCAGAGGTGCTT	>TUT1(-)_AGTGGGTTCCGGTGGTGGCAGAGGTGCTT
chr7	876553	876554	GET4	138	+	250	61	311	15	185	20	13	33	6	3	1	>GET4(+)_CCGCCCCCGACTGCGCGCGA	>GET4(+)_CCGCCCCCGACTGCGCGCGACTCCTCGCGGGCCACCGTAGAAGGGCGT	>GET4(+)_ACTCCTCGCGGGCCACCGTAGAAGGGCGT
chr7	100889684	100889685	UFSP1	119	-	265	45	310	11	138	31	2	33	4	9	2	>UFSP1(-)_GGCGGAGCATTGTGGGAGCT	>UFSP1(-)_GGCGGAGCATTGTGGGAGCTCCTCGGTCGGTGCCGGTCGGTGGCTGCC	>UFSP1(-)_TCCTCGGTCGGTGCCGGTCGGTGGCTGCC
chr16	28403830	28403831	EIF3CL	86	-	189	121	310	10	210	24	9	33	10	3	5	>EIF3CL(-)_TCCCGGAAGTGACGCGAGGA	>EIF3CL(-)_TCCCGGAAGTGACGCGAGGACCCGCCTTCTCTCTCGGCGTTTCCGCTG	>EIF3CL(-)_ACCCGCCTTCTCTCTCGGCGTTTCCGCTG
chr5	10249819	10249820	ATPSCKMT	24	-	262	20	282	3	156	31	2	33	0	10	4	>ATPSCKMT(-)_GGTGAGGCTGGAGCGGCTTG	>ATPSCKMT(-)_GGTGAGGCTGGAGCGGCTTGGCGGGTTCCTGGGGGCATGAGAAGGGGT	>ATPSCKMT(-)_GGCGGGTTCCTGGGGGCATGAGAAGGGGT
chr7	1504375	1504376	INTS1	123	-	217	43	260	3	248	32	1	33	10	4	1	>INTS1(-)_CGGAAGTCGGGTCCTCGAGG	>INTS1(-)_CGGAAGTCGGGTCCTCGAGGGCGGTGAGATCGGTTTCCGATTCCGGGG	>INTS1(-)_GGCGGTGAGATCGGTTTCCGATTCCGGGG
chr11	7987339	7987340	EIF3F	39	+	173	79	252	33	182	29	4	33	7	4	1	>EIF3F(+)_ATATTCATGAATGCTGTCAT	>EIF3F(+)_ATATTCATGAATGCTGTCATTTCCGCTTCCGCCTCCTTCTTTCTCGAC	>EIF3F(+)_TTTCCGCTTCCGCCTCCTTCTTTCTCGAC
chr10	70146668	70146669	TYSND1	69	-	122	51	173	9	185	32	1	33	2	5	2	>TYSND1(-)_CTTGCGCCTCTCGCTTCCAG	>TYSND1(-)_CTTGCGCCTCTCGCTTCCAGCTGTGGGTGGCGCTAGGCAGCTTCAGCC	>TYSND1(-)_GCTGTGGGTGGCGCTAGGCAGCTTCAGCC
chr19	18438130	18438131	ISYNA1	22	-	122	40	162	24	96	29	4	33	1	8	5	>ISYNA1(-)_GCAGCGCTTTTCTCCGGAGG	>ISYNA1(-)_GCAGCGCTTTTCTCCGGAGGTCGCGCGCCCGAGAGCCCGCGCTGTCCG	>ISYNA1(-)_GTCGCGCGCCCGAGAGCCCGCGCTGTCCG
chr15	72231200	72231201	PKM	147	-	357	636	993	122	128	22	10	32	18	81	42	>PKM(-)_TGCGGCGGCCCGCAGCGGGA	>PKM(-)_TGCGGCGGCCCGCAGCGGGATAACCTTGAGGCTGAGGCAGTGGCTCCT	>PKM(-)_ATAACCTTGAGGCTGAGGCAGTGGCTCCT
chr18	59899995	59899996	PMAIP1	754	+	256	674	930	563	96	14	18	32	76	38	10	>PMAIP1(+)_TCACTGGACAAAAGCGTGGT	>PMAIP1(+)_TCACTGGACAAAAGCGTGGTCTCTGGCGCGGGGATCTCAGAGTTTCCC	>PMAIP1(+)_TCTCTGGCGCGGGGATCTCAGAGTTTCCC
chr11	2929419	2929420	PHLDA2	929	-	260	521	781	177	92	13	19	32	4	66	7	>PHLDA2(-)_GGGGCAGCTATAAAGGCCGC	>PHLDA2(-)_GGGGCAGCTATAAAGGCCGCGCCGGGGCCACGAGGAGCAGAGCCGGCG	>PHLDA2(-)_CGCCGGGGCCACGAGGAGCAGAGCCGGCG
chr3	153162240	153162241	RAP2B	344	+	342	396	738	44	215	21	11	32	12	35	7	>RAP2B(+)_CGGCGAGTAGGAAGCCCTCG	>RAP2B(+)_CGGCGAGTAGGAAGCCCTCGCCCAGTAGAGGCTGTGGGAGAGAGCGCG	>RAP2B(+)_GCCCAGTAGAGGCTGTGGGAGAGAGCGCG
chr3	98901681	98901682	DCBLD2	1611	-	533	181	714	37	179	28	4	32	11	15	11	>DCBLD2(-)_GAGGGAGCGCGAGGGAGCTG	>DCBLD2(-)_GAGGGAGCGCGAGGGAGCTGGCTGCGGGCCTGCCTGCCAGCTAGCCGG	>DCBLD2(-)_GGCTGCGGGCCTGCCTGCCAGCTAGCCGG
chr1	25247453	25247454	RSRP1	2325	-	247	462	709	7	52	10	22	32	1	3	2	>RSRP1(-)_TTCTGGTACTTTTGACGCGT	>RSRP1(-)_TTCTGGTACTTTTGACGCGTCTGCTAACGTAGTCCCTCAGTGCGCATC	>RSRP1(-)_TCTGCTAACGTAGTCCCTCAGTGCGCATC
chr10	31928813	31928814	ARHGAP12	359	-	575	123	698	2	190	29	3	32	6	7	3	>ARHGAP12(-)_CGGCGCGCTCCGACGTGCCC	>ARHGAP12(-)_CGGCGCGCTCCGACGTGCCCTGTAACTTACCCTCCCTCAGAGGCCAGC	>ARHGAP12(-)_CTGTAACTTACCCTCCCTCAGAGGCCAGC
chr18	12308240	12308241	TUBB6	2596	+	243	393	636	50	151	17	15	32	16	21	5	>TUBB6(+)_GCGGAGGGTCGGCCCCGGGA	>TUBB6(+)_GCGGAGGGTCGGCCCCGGGACGCGCGCAGCCGGCCCGCAGTTGCCGCT	>TUBB6(+)_ACGCGCGCAGCCGGCCCGCAGTTGCCGCT
chr12	120534355	120534356	RNF10	394	+	386	245	631	227	193	27	5	32	25	216	37	>RNF10(+)_CTCCACTATATATACAGTCC	>RNF10(+)_CTCCACTATATATACAGTCCATCCGGGTTCTTTGAGATGCTGTTTGGC	>RNF10(+)_CATCCGGGTTCTTTGAGATGCTGTTTGGC
chr6	26123925	26123926	HIST1H2BC	428	-	72	551	623	530	51	6	26	32	68	19	5	>HIST1H2BC(-)_AAAGCCCTATAAGTAGCAGA	>HIST1H2BC(-)_AAAGCCCTATAAGTAGCAGAAATCCGCTCTTTACTTTCGACACATTTC	>HIST1H2BC(-)_AAATCCGCTCTTTACTTTCGACACATTTC
chr19	1592340	1592341	MBD3	190	-	498	122	620	16	153	29	3	32	15	11	9	>MBD3(-)_CGCCCGGCGCGCGGAGGCCC	>MBD3(-)_CGCCCGGCGCGCGGAGGCCCAGTGCGCGTGCGCCGCTTGTTGGGCCGC	>MBD3(-)_CAGTGCGCGTGCGCCGCTTGTTGGGCCGC
chr20	10673998	10673999	JAG1	2429	-	255	359	614	8	133	17	15	32	1	2	4	>JAG1(-)_GTGCTGGGTAGAGGTGGCCA	>JAG1(-)_GTGCTGGGTAGAGGTGGCCAGCCCCGGCCGCTGCTGCCAGACGGGCTC	>JAG1(-)_AGCCCCGGCCGCTGCTGCCAGACGGGCTC
chr12	121400117	121400118	RNF34	191	+	379	214	593	26	174	24	8	32	9	9	10	>RNF34(+)_CTTACGTCCGGACGCTCGGT	>RNF34(+)_CTTACGTCCGGACGCTCGGTCGCCTCCCGGGGCGCGGTAATCACCGCC	>RNF34(+)_TCGCCTCCCGGGGCGCGGTAATCACCGCC
chr5	141320777	141320778	TAF7	180	-	402	181	583	30	158	24	8	32	19	9	17	>TAF7(-)_CAGCCGCCTCCCGCCCCGCG	>TAF7(-)_CAGCCGCCTCCCGCCCCGCGTCGCGACGTAGCACTTCCGTTTTTGCTG	>TAF7(-)_GTCGCGACGTAGCACTTCCGTTTTTGCTG
chr2	69437434	69437435	NFU1	108	-	432	126	558	4	227	30	2	32	7	10	19	>NFU1(-)_GCAGATCTTTCGTGGTTCTG	>NFU1(-)_GCAGATCTTTCGTGGTTCTGTCAGGGAGACCCTTAGGCACTCCGGACT	>NFU1(-)_GTCAGGGAGACCCTTAGGCACTCCGGACT
chr12	68610907	68610908	RAP1B	250	+	377	156	533	65	159	26	6	32	14	4	4	>RAP1B(+)_GAGCGAGGCTGAACGCCTGA	>RAP1B(+)_GAGCGAGGCTGAACGCCTGACGTCAAGGCGACATCGCCAAACCTCGCC	>RAP1B(+)_ACGTCAAGGCGACATCGCCAAACCTCGCC
chr1	19312325	19312326	PQLC2	286	+	326	195	521	48	138	29	3	32	24	19	11	>PQLC2(+)_GGTGGCGCGCGGTCAGCTGA	>PQLC2(+)_GGTGGCGCGCGGTCAGCTGACCCGGCGGGCCTTGACCCAGAAGCTGGG	>PQLC2(+)_ACCCGGCGGGCCTTGACCCAGAAGCTGGG
chr14	73058533	73058534	RBM25	92	+	378	139	517	7	166	26	6	32	2	14	6	>RBM25(+)_TCCCCGCCCCCGGCCGCAGT	>RBM25(+)_TCCCCGCCCCCGGCCGCAGTGCACGCCGGGCAAGAGGAAGACCTCCAT	>RBM25(+)_TGCACGCCGGGCAAGAGGAAGACCTCCAT
chr1	40161386	40161387	RLF	69	+	413	103	516	6	171	26	6	32	3	10	11	>RLF(+)_AGGGCTGAGTCACGTGGCTT	>RLF(+)_AGGGCTGAGTCACGTGGCTTGGTTGCCTACGCGCTGGTGGGCCGTGGG	>RLF(+)_TGGTTGCCTACGCGCTGGTGGGCCGTGGG
chr5	177497600	177497601	PDLIM7	2139	-	250	260	510	725	160	27	5	32	103	38	16	>PDLIM7(-)_GCGCGCTCAAAGTGGAGGGT	>PDLIM7(-)_GCGCGCTCAAAGTGGAGGGTGGCTGTGGGGGCGGGGTCAGAACACTGG	>PDLIM7(-)_TGGCTGTGGGGGCGGGGTCAGAACACTGG
chr14	92121983	92121984	CPSF2	167	+	360	149	509	33	183	24	8	32	11	32	22	>CPSF2(+)_CCTGGTTCCTCCTCGTCTCC	>CPSF2(+)_CCTGGTTCCTCCTCGTCTCCGCCGCTAGTCTCCAGCTCCAAAATGGCG	>CPSF2(+)_CGCCGCTAGTCTCCAGCTCCAAAATGGCG
chr14	76812860	76812861	ANGEL1	132	-	401	105	506	12	175	28	4	32	3	18	12	>ANGEL1(-)_GGGGGCGGGGCCGAGCTGAG	>ANGEL1(-)_GGGGGCGGGGCCGAGCTGAGGGAGGACCTGCTGGCTGCAGTGAGGAGC	>ANGEL1(-)_GGGAGGACCTGCTGGCTGCAGTGAGGAGC
chr9	37785063	37785064	EXOSC3	102	-	377	115	492	9	198	30	2	32	6	6	11	>EXOSC3(-)_TGGAAGCGGAGCGGAAGCGG	>EXOSC3(-)_TGGAAGCGGAGCGGAAGCGGAAGGCGGGTACCGGAAACGGTGTTTGGT	>EXOSC3(-)_GAAGGCGGGTACCGGAAACGGTGTTTGGT
chr19	15418987	15418988	AKAP8L	182	-	396	89	485	19	179	32	0	32	3	25	12	>AKAP8L(-)_GGGTGTGTGTGGAGGGGACC	>AKAP8L(-)_GGGTGTGTGTGGAGGGGACCCTGTGGTTAGCAGCAGCTATCGCAGCGT	>AKAP8L(-)_CCTGTGGTTAGCAGCAGCTATCGCAGCGT
chr15	70763505	70763506	UACA	71	-	309	174	483	19	170	24	8	32	4	8	5	>UACA(-)_CCCGGGGCCCGCAGGTGGCA	>UACA(-)_CCCGGGGCCCGCAGGTGGCAGGCAGGTGGGGCTGGTACAGCCCGCGCC	>UACA(-)_AGGCAGGTGGGGCTGGTACAGCCCGCGCC
chr3	27484383	27484384	SLC4A7	951	-	192	283	475	224	145	21	11	32	46	23	9	>SLC4A7(-)_CGGCTCTCCTCCTTCCCGCT	>SLC4A7(-)_CGGCTCTCCTCCTTCCCGCTCGGTCCGCCGGTTCGCTCAGTTCTAGCT	>SLC4A7(-)_TCGGTCCGCCGGTTCGCTCAGTTCTAGCT
chr5	168486470	168486471	RARS	119	+	373	102	475	17	220	31	1	32	8	1	3	>RARS(+)_CCGCTTCCGGGAGAGGCTGA	>RARS(+)_CCGCTTCCGGGAGAGGCTGACCGTTTCCGCTTCCGTCCACTTGGCGAG	>RARS(+)_ACCGTTTCCGCTTCCGTCCACTTGGCGAG
chr1	113812261	113812262	RSBN1	54	-	324	149	473	52	207	31	1	32	8	127	30	>RSBN1(-)_TCGGGCCATTTAAATGTGTG	>RSBN1(-)_TCGGGCCATTTAAATGTGTGTTTGTGGGTGAAATGGCTGCGCAGGTCG	>RSBN1(-)_GTTTGTGGGTGAAATGGCTGCGCAGGTCG
chr15	65029638	65029639	MTFMT	257	-	331	136	467	14	191	27	5	32	6	7	5	>MTFMT(-)_CAGGCTGCACCCTTGTCCCC	>MTFMT(-)_CAGGCTGCACCCTTGTCCCCGCCCCGATGCGCCTGCGCAGGGCCGGCC	>MTFMT(-)_CGCCCCGATGCGCCTGCGCAGGGCCGGCC
chr1	52726466	52726467	ZYG11B	177	+	333	131	464	7	155	28	4	32	5	3	4	>ZYG11B(+)_GCCCGGGCGGGTCCTCGCGG	>ZYG11B(+)_GCCCGGGCGGGTCCTCGCGGGGGCGGAGTCTGCGCTCTGGTTCGGGCT	>ZYG11B(+)_GGGGCGGAGTCTGCGCTCTGGTTCGGGCT
chr1	154970746	154970747	SHC1	809	-	126	334	460	136	81	12	20	32	33	9	9	>SHC1(-)_GCCAGAAGCGCTGGGTCCAG	>SHC1(-)_GCCAGAAGCGCTGGGTCCAGCCTGTTCTCTTCTCAGCCAGAGAAGAGG	>SHC1(-)_GCCTGTTCTCTTCTCAGCCAGAGAAGAGG
chr22	30356890	30356891	SF3A1	45	-	356	99	455	19	217	30	2	32	12	10	2	>SF3A1(-)_GTCGTACCTTCGCGGCCGCA	>SF3A1(-)_GTCGTACCTTCGCGGCCGCAACTCGCTCGGCCGCCGCCATCTTGCGAG	>SF3A1(-)_AACTCGCTCGGCCGCCGCCATCTTGCGAG
chr8	73293629	73293630	RPL7	263	-	242	206	448	343	141	22	10	32	58	73	20	>RPL7(-)_AAGTCTTTAAGTGGACAGTA	>RPL7(-)_AAGTCTTTAAGTGGACAGTACGCATGCGCCAACTTCCTCTTTTTCCGG	>RPL7(-)_ACGCATGCGCCAACTTCCTCTTTTTCCGG
chr9	125707188	125707189	MAPKAP1	243	-	377	71	448	16	166	29	3	32	5	10	15	>MAPKAP1(-)_CGCCGGGGTGTGGTTCCGGG	>MAPKAP1(-)_CGCCGGGGTGTGGTTCCGGGTCGTGTGCGGCTCGGGGTAATAGGGCTG	>MAPKAP1(-)_GTCGTGTGCGGCTCGGGGTAATAGGGCTG
chr20	3846877	3846878	MAVS	480	+	312	132	444	76	135	25	7	32	21	30	12	>MAVS(+)_GCTGCGGGAAGGGTCCTGGG	>MAVS(+)_GCTGCGGGAAGGGTCCTGGGCCCCGGGCGGCGGTCGCCAGGTCTCAGG	>MAVS(+)_GCCCCGGGCGGCGGTCGCCAGGTCTCAGG
chr5	33440992	33440993	TARS	114	+	371	68	439	10	187	30	2	32	0	15	10	>TARS(+)_GGCGCCTTTCGATTGCATCA	>TARS(+)_GGCGCCTTTCGATTGCATCAGCTGGTCCAGCCGAGGCCAAGTCCCGGG	>TARS(+)_AGCTGGTCCAGCCGAGGCCAAGTCCCGGG
chr17	76353903	76353904	PRPSAP1	61	-	341	98	439	4	185	23	9	32	2	3	2	>PRPSAP1(-)_GGATGCCCGGAGGGGGCGGT	>PRPSAP1(-)_GGATGCCCGGAGGGGGCGGTGGCCTTGCCTCTGGCTCTGAGGCGGCGG	>PRPSAP1(-)_TGGCCTTGCCTCTGGCTCTGAGGCGGCGG
chr7	45111696	45111697	TBRG4	96	-	268	169	437	30	220	29	3	32	17	7	16	>TBRG4(-)_GCGCTCCGAGTGACGTAGGG	>TBRG4(-)_GCGCTCCGAGTGACGTAGGGAAGCGCGCCGCGCACCTCATGGTTCCGG	>TBRG4(-)_GAAGCGCGCCGCGCACCTCATGGTTCCGG
chr11	6683332	6683333	MRPL17	460	-	251	179	430	14	177	27	5	32	9	4	6	>MRPL17(-)_CCTGAAATTGCCGCCACCGG	>MRPL17(-)_CCTGAAATTGCCGCCACCGGCTCTACCTTCCAGTTTCCAGTTCCGGCC	>MRPL17(-)_GCTCTACCTTCCAGTTTCCAGTTCCGGCC
chr2	27032948	27032949	TMEM214	75	+	380	47	427	4	158	25	7	32	6	5	3	>TMEM214(+)_CCGGGCGCCGGGCGCGCGGT	>TMEM214(+)_CCGGGCGCCGGGCGCGCGGTCCTGCGAGGAGACGTGGCAGAGTGCGGC	>TMEM214(+)_TCCTGCGAGGAGACGTGGCAGAGTGCGGC
chr21	43776291	43776292	CSTB	275	-	244	180	424	19	199	30	2	32	4	7	5	>CSTB(-)_TGAGGAGCCGCCGCGTCCCC	>CSTB(-)_TGAGGAGCCGCCGCGTCCCCTCGCCGAGTCCCCTCGCCAGATTCCCTC	>CSTB(-)_CTCGCCGAGTCCCCTCGCCAGATTCCCTC
chr20	25195727	25195728	ENTPD6	65	+	355	64	419	12	165	29	3	32	3	7	8	>ENTPD6(+)_CCTGTGACGCCACGTGCATG	>ENTPD6(+)_CCTGTGACGCCACGTGCATGGGGCGGAGCCCAGGCCCTAGGGAATCGT	>ENTPD6(+)_GGGGCGGAGCCCAGGCCCTAGGGAATCGT
chr6	42746060	42746061	TBCC	487	-	233	184	417	84	188	26	6	32	16	51	11	>TBCC(-)_CAAGAGAGAGGAAGCTTGAA	>TBCC(-)_CAAGAGAGAGGAAGCTTGAAGCCAATATGGAGTCCGTCAGTTGCTCCG	>TBCC(-)_AGCCAATATGGAGTCCGTCAGTTGCTCCG
chr4	88523754	88523755	PYURF	76	-	326	91	417	2	140	27	5	32	6	7	3	>PYURF(-)_GGGCCTGCCCGGCTGGCCTG	>PYURF(-)_GGGCCTGCCCGGCTGGCCTGGACGAACGGGAAGCCGGGAGCTCGGCCA	>PYURF(-)_GGACGAACGGGAAGCCGGGAGCTCGGCCA
chr3	47381064	47381065	PTPN23	109	+	316	100	416	9	104	25	7	32	8	6	7	>PTPN23(+)_GGGCTCGTGGCTGAGCCAGC	>PTPN23(+)_GGGCTCGTGGCTGAGCCAGCAGCTGCAGCAGCTACGGGAGTGGCCGGG	>PTPN23(+)_CAGCTGCAGCAGCTACGGGAGTGGCCGGG
chr16	721145	721146	FAM173A	182	+	380	35	415	8	171	28	4	32	2	2	2	>FAM173A(+)_CACAGCGCCACGGACCGACC	>FAM173A(+)_CACAGCGCCACGGACCGACCGCGCAGGCTCTGCCGGCCACTTCCGGTG	>FAM173A(+)_CGCGCAGGCTCTGCCGGCCACTTCCGGTG
chr9	99221939	99221940	ALG2	802	-	293	113	406	32	209	26	6	32	12	5	11	>ALG2(-)_CAGTGGCCAGCTGGGAGCTA	>ALG2(-)_CAGTGGCCAGCTGGGAGCTACGAGCGCGGAGCTTGCGCAGAAGACCCC	>ALG2(-)_ACGAGCGCGGAGCTTGCGCAGAAGACCCC
chr12	8032717	8032718	FOXJ2	23	+	354	51	405	3	216	27	5	32	0	4	4	>FOXJ2(+)_GAGCGCGGCGCGGAGGCCGG	>FOXJ2(+)_GAGCGCGGCGCGGAGGCCGGGGAGGAGCCGGGGCCTGCAGCGGAGCCG	>FOXJ2(+)_GGGAGGAGCCGGGGCCTGCAGCGGAGCCG
chr16	28951006	28951007	NFATC2IP	12	+	280	121	401	22	169	28	4	32	9	28	33	>NFATC2IP(+)_GAGGCGAGAGGAGGCGGGCG	>NFATC2IP(+)_GAGGCGAGAGGAGGCGGGCGTGTGTTGTGGAGGAAAGTGTGCCATGGC	>NFATC2IP(+)_GTGTGTTGTGGAGGAAAGTGTGCCATGGC
chr6	96521840	96521841	UFL1	225	+	246	152	398	42	170	28	4	32	10	18	6	>UFL1(+)_CCTCTCTTCTCCCACCGCCT	>UFL1(+)_CCTCTCTTCTCCCACCGCCTGTCGGCTGACGTGTCTGCAGTTCCTCCG	>UFL1(+)_TGTCGGCTGACGTGTCTGCAGTTCCTCCG
chr6	99521048	99521049	TSTD3	349	+	267	128	395	66	189	24	8	32	9	16	15	>TSTD3(+)_GGCCGGAGCAGGAGGAGAAG	>TSTD3(+)_GGCCGGAGCAGGAGGAGAAGGAGTAGGAGGAAGTGGTCACTAGCGCGG	>TSTD3(+)_GGAGTAGGAGGAAGTGGTCACTAGCGCGG
chr5	122845612	122845613	SNX24	175	+	294	100	394	13	181	29	3	32	7	2	5	>SNX24(+)_GGCGGCCGCGGCCGTGAGCC	>SNX24(+)_GGCGGCCGCGGCCGTGAGCCTGCCCCCAACTCGCCCTCAGCCGGCTGG	>SNX24(+)_CTGCCCCCAACTCGCCCTCAGCCGGCTGG
chr1	153977657	153977658	JTB	379	-	300	90	390	26	174	29	3	32	8	8	4	>JTB(-)_AGTGAGCAGCAGGCGAGGCG	>JTB(-)_AGTGAGCAGCAGGCGAGGCGCCACCGACGCGGAAGACTATAAGCCCCA	>JTB(-)_GCCACCGACGCGGAAGACTATAAGCCCCA
chr11	71787521	71787522	FAM86C1	38	+	283	102	385	27	255	28	4	32	13	9	12	>FAM86C1(+)_CCAGGCCCGGCTTCCGCCCG	>FAM86C1(+)_CCAGGCCCGGCTTCCGCCCGGTCTCCCGGCAAGGCTGAGGCCCCGCCC	>FAM86C1(+)_GGTCTCCCGGCAAGGCTGAGGCCCCGCCC
chr1	23980326	23980327	SRSF10	90	-	263	119	382	50	140	25	7	32	14	5	7	>SRSF10(-)_TCGGTTGCCGTAGCAGAGCC	>SRSF10(-)_TCGGTTGCCGTAGCAGAGCCCTCTAGCTGTGTGTGTCTGAGGCTCGGC	>SRSF10(-)_CCTCTAGCTGTGTGTGTCTGAGGCTCGGC
chr22	29581090	29581091	NIPSNAP1	12	-	323	56	379	13	194	28	4	32	5	8	1	>NIPSNAP1(-)_ACCAGGGCTTGGGGGCGGGG	>NIPSNAP1(-)_ACCAGGGCTTGGGGGCGGGGCCTTCCTGCAACCTTTGCGGCTCCAACA	>NIPSNAP1(-)_GCCTTCCTGCAACCTTTGCGGCTCCAACA
chr16	30762321	30762322	RNF40	232	+	239	139	378	10	194	24	8	32	3	6	2	>RNF40(+)_GGGGCAGTGGCGTCCAGTGA	>RNF40(+)_GGGGCAGTGGCGTCCAGTGACGCCCAGTGACGTCCGGTGAAATCCAAG	>RNF40(+)_ACGCCCAGTGACGTCCGGTGAAATCCAAG
chr11	119018342	119018343	RPS25	202	-	258	118	376	158	216	26	6	32	38	34	15	>RPS25(-)_GGACGGTGGTTTTTGGGCCC	>RPS25(-)_GGACGGTGGTTTTTGGGCCCGTTTCTGAGCAGCGCTTCCTTTTTGTCC	>RPS25(-)_CGTTTCTGAGCAGCGCTTCCTTTTTGTCC
chr1	46719092	46719093	EFCAB14	30	-	308	65	373	4	216	32	0	32	3	6	10	>EFCAB14(-)_CGGCCGCTGCCAAAGGGGAA	>EFCAB14(-)_CGGCCGCTGCCAAAGGGGAAGTGATCTGGGGCTGGAGCGATGGCCCGG	>EFCAB14(-)_AGTGATCTGGGGCTGGAGCGATGGCCCGG
chr16	2214787	2214788	PGP	30	-	309	61	370	18	142	29	3	32	0	0	0	>PGP(-)_GGGCGGCTGCGAGGAGCGGC	>PGP(-)_GGGCGGCTGCGAGGAGCGGCCGGCGGGCGGCGGCGGCCGGCGGGCGGC	>PGP(-)_CCGGCGGGCGGCGGCGGCCGGCGGGCGGC
chr19	1026628	1026629	CNN2	85	+	188	181	369	7	142	24	8	32	5	10	11	>CNN2(+)_CCCCGCGCCAGCCCGGCGGT	>CNN2(+)_CCCCGCGCCAGCCCGGCGGTCCCGTCCCGTCCCGTCCTGTGCGGCCCC	>CNN2(+)_TCCCGTCCCGTCCCGTCCTGTGCGGCCCC
chr4	41990529	41990530	SLC30A9	168	+	216	151	367	45	245	21	11	32	12	6	10	>SLC30A9(+)_AGGCGTCGCTAAATGACGTT	>SLC30A9(+)_AGGCGTCGCTAAATGACGTTGCCGTTTCCGGGTCACCCAGGCAGCTTG	>SLC30A9(+)_TGCCGTTTCCGGGTCACCCAGGCAGCTTG
chr8	141001265	141001266	PTK2	39	-	319	48	367	6	180	32	0	32	3	6	1	>PTK2(-)_CGCGGGCCCGCGCCGACGCA	>PTK2(-)_CGCGGGCCCGCGCCGACGCAGCACGGCCTCGAGGGCGCGAGCCCGCGC	>PTK2(-)_AGCACGGCCTCGAGGGCGCGAGCCCGCGC
chr22	40856621	40856622	ST13	51	-	264	99	363	90	153	28	4	32	17	42	8	>ST13(-)_GGAGGTTCTAGTCTGTTCTG	>ST13(-)_GGAGGTTCTAGTCTGTTCTGTCTTGCGGCAGCCGCCCCCTTCTGCGCG	>ST13(-)_GTCTTGCGGCAGCCGCCCCCTTCTGCGCG
chr5	118988520	118988521	DTWD2	20	-	346	15	361	1	274	31	1	32	4	0	2	>DTWD2(-)_CCGGCGGCAGCCGGGCTTCA	>DTWD2(-)_CCGGCGGCAGCCGGGCTTCAATGCCACGGCCTGACCGGAGTGTCCGCC	>DTWD2(-)_AATGCCACGGCCTGACCGGAGTGTCCGCC
chr10	7788178	7788179	ATP5F1C	51	+	228	132	360	40	186	23	9	32	9	5	9	>ATP5F1C(+)_GCTGGGGAGCTTCGGCGCAT	>ATP5F1C(+)_GCTGGGGAGCTTCGGCGCATGCGCGCTGAGGCCTGCCTGACCGACCTT	>ATP5F1C(+)_TGCGCGCTGAGGCCTGCCTGACCGACCTT
chr2	152718636	152718637	ARL6IP6	57	+	275	82	357	10	229	30	2	32	1	14	10	>ARL6IP6(+)_CCGCGGGTTTCGTTGTGTTT	>ARL6IP6(+)_CCGCGGGTTTCGTTGTGTTTCGCGCCATGTCGTTTGCTGAGAGCGGGT	>ARL6IP6(+)_TCGCGCCATGTCGTTTGCTGAGAGCGGGT
chr20	33674387	33674388	NECAB3	145	-	242	108	350	14	155	30	2	32	6	8	3	>NECAB3(-)_CTAGCCACACCGAGTCCGCC	>NECAB3(-)_CTAGCCACACCGAGTCCGCCGCGGCGTCCAGGGTCGGCAGCAACCGCA	>NECAB3(-)_CGCGGCGTCCAGGGTCGGCAGCAACCGCA
chr7	102478921	102478922	POLR2J	100	-	262	88	350	14	246	28	4	32	12	9	2	>POLR2J(-)_GGGTTTGCCCCGCCGGAGTA	>POLR2J(-)_GGGTTTGCCCCGCCGGAGTAATCCGGAAGAGGCCTCTTATTAGGGCTC	>POLR2J(-)_AATCCGGAAGAGGCCTCTTATTAGGGCTC
chr20	46089961	46089962	NCOA5	105	-	280	67	347	36	238	32	0	32	12	39	16	>NCOA5(-)_CGCCTGCCGCTACGTGCGCG	>NCOA5(-)_CGCCTGCCGCTACGTGCGCGCCCTCTGCCCCCATCTCCACTCTCCGCC	>NCOA5(-)_GCCCTCTGCCCCCATCTCCACTCTCCGCC
chr22	23894382	23894383	MIF	289	+	229	118	347	15	90	22	10	32	3	21	16	>MIF(+)_CCTGGCGCCGGCGGTGGCGT	>MIF(+)_CCTGGCGCCGGCGGTGGCGTCACAAAAGGCGGGACCACAGTGGTGTCC	>MIF(+)_TCACAAAAGGCGGGACCACAGTGGTGTCC
chr10	92291202	92291203	MARCH5	164	+	298	42	340	5	137	31	1	32	2	11	2	>MARCH5(+)_TTACCTCACAAAGGTAGCTC	>MARCH5(+)_TTACCTCACAAAGGTAGCTCCTCCGCCGGCAGCAACTCGGCGCCCGCG	>MARCH5(+)_CCTCCGCCGGCAGCAACTCGGCGCCCGCG
chr20	57351254	57351255	RAE1	186	+	282	52	334	13	204	29	3	32	3	5	11	>RAE1(+)_GGGCGACGCAGGAAGTGGCT	>RAE1(+)_GGGCGACGCAGGAAGTGGCTCCAGGGCGCACGCGCGTTGTTTCCGCGG	>RAE1(+)_TCCAGGGCGCACGCGCGTTGTTTCCGCGG
chr4	25377266	25377267	ANAPC4	18	+	274	60	334	11	155	28	4	32	8	1	5	>ANAPC4(+)_CCTGGAGCGCGCGACAGCGG	>ANAPC4(+)_CCTGGAGCGCGCGACAGCGGCGGGGCGGGGCGGCCTGGAGGCTGTGGC	>ANAPC4(+)_GCGGGGCGGGGCGGCCTGGAGGCTGTGGC
chr6	3118721	3118722	BPHL	17	+	254	74	328	16	197	30	2	32	4	14	5	>BPHL(+)_GGTACCGCGCTTGGTCTTAG	>BPHL(+)_GGTACCGCGCTTGGTCTTAGCGCATGCGCACTCCCGGCAGCTACGCGA	>BPHL(+)_GCGCATGCGCACTCCCGGCAGCTACGCGA
chr4	48269837	48269838	TEC	77	-	255	72	327	5	190	29	3	32	4	0	2	>TEC(-)_GGGGAGATCAGAGGGCGGGG	>TEC(-)_GGGGAGATCAGAGGGCGGGGCGGGGCGCTTTGCTCTGGACTCTGGGGC	>TEC(-)_GCGGGGCGCTTTGCTCTGGACTCTGGGGC
chr12	132144456	132144457	NOC4L	36	+	268	55	323	6	179	30	2	32	0	0	1	>NOC4L(+)_CTACGCGCAGTGGTGACGTC	>NOC4L(+)_CTACGCGCAGTGGTGACGTCACGGGAGCGCCGGCGGCTGAGAATCCGC	>NOC4L(+)_CACGGGAGCGCCGGCGGCTGAGAATCCGC
chr5	131797016	131797017	FNIP1	99	-	207	109	316	60	136	28	4	32	25	13	6	>FNIP1(-)_CCGCGCGCCGTGGCCGTTTG	>FNIP1(-)_CCGCGCGCCGTGGCCGTTTGAAGTGACTAATTTCTGTCATATGACTGA	>FNIP1(-)_GAAGTGACTAATTTCTGTCATATGACTGA
chr13	114281627	114281628	UPF3A	14	+	282	13	295	0	196	31	1	32	1	2	8	>UPF3A(+)_CGCGAGGTTTCGTCGGGGGC	>UPF3A(+)_CGCGAGGTTTCGTCGGGGGCTGGCGGCTGCGGCTCGGCGGAGAGTGCG	>UPF3A(+)_CTGGCGGCTGCGGCTCGGCGGAGAGTGCG
chr16	2205453	2205454	MLST8	28	+	259	13	272	3	239	28	4	32	2	4	2	>MLST8(+)_CTAGGGAGCCATCGATAACT	>MLST8(+)_CTAGGGAGCCATCGATAACTCTACGCTCGGCCTCGATCGACTCGCTCC	>MLST8(+)_TCTACGCTCGGCCTCGATCGACTCGCTCC
chr10	68407276	68407277	RUFY2	316	-	207	50	257	3	164	29	3	32	1	0	1	>RUFY2(-)_CCGCCGGGGGCGCTGTGGGC	>RUFY2(-)_CCGCCGGGGGCGCTGTGGGCTGCAGCGGGCCTGGCTGCAGATGCGGTG	>RUFY2(-)_CTGCAGCGGGCCTGGCTGCAGATGCGGTG
chr1	11099836	11099837	EXOSC10	43	-	204	51	255	10	197	30	2	32	4	2	4	>EXOSC10(-)_TCGGCCGACAAGCTCTCGCG	>EXOSC10(-)_TCGGCCGACAAGCTCTCGCGAGACGAGCCGTGCAGGCTGAAAAAATGG	>EXOSC10(-)_GAGACGAGCCGTGCAGGCTGAAAAAATGG
chr16	30698195	30698196	SRCAP	135	+	165	84	249	56	212	25	7	32	12	8	1	>SRCAP(+)_CGCGCCGGCGATAGCGATTC	>SRCAP(+)_CGCGCCGGCGATAGCGATTCCGAGCGAGTGGTGGTGGTAGTGGTGGTG	>SRCAP(+)_CCGAGCGAGTGGTGGTGGTAGTGGTGGTG
chr3	50359514	50359515	TMEM115	53	-	179	65	244	9	190	26	6	32	6	6	3	>TMEM115(-)_GCCCGCTGCCGCCGGGGACG	>TMEM115(-)_GCCCGCTGCCGCCGGGGACGCGCAGGCGCAGCACCCCTGTTTGTCGGC	>TMEM115(-)_GCGCAGGCGCAGCACCCCTGTTTGTCGGC
chr15	42273603	42273604	GANC	78	+	124	84	208	7	145	27	5	32	5	0	3	>GANC(+)_GTGAGACTTTGGACCTACTG	>GANC(+)_GTGAGACTTTGGACCTACTGCGCAGGCGTCATCCTGTTGGAACCTGGT	>GANC(+)_GCGCAGGCGTCATCCTGTTGGAACCTGGT
chr16	3024060	3024061	THOC6	40	+	157	35	192	7	121	30	2	32	5	6	6	>THOC6(+)_CTTTAGGCGGGCACAGCCGC	>THOC6(+)_CTTTAGGCGGGCACAGCCGCGAGGTTCTGCGCGGGCGCGGAAGACGGG	>THOC6(+)_CGAGGTTCTGCGCGGGCGCGGAAGACGGG
chr11	65638135	65638136	SIPA1	39	+	128	34	162	7	103	27	5	32	6	3	6	>SIPA1(+)_GGCGGAGCCGGCGCCGGGAG	>SIPA1(+)_GGCGGAGCCGGCGCCGGGAGCGGTAGCGGGAGAGCGGCAGCGGGACCC	>SIPA1(+)_GCGGTAGCGGGAGAGCGGCAGCGGGACCC
chr17	8376688	8376689	KRBA2	33	-	111	44	155	0	108	28	4	32	0	1	2	>KRBA2(-)_GCGGAGCGGGCGGGAGGTGG	>KRBA2(-)_GCGGAGCGGGCGGGAGGTGGGGCGGAGTTGCTGCTCGGGGGCCTCTGG	>KRBA2(-)_GGGCGGAGTTGCTGCTCGGGGGCCTCTGG
chr4	185396432	185396433	LRP2BP	37	-	99	26	125	11	91	27	5	32	3	1	0	>LRP2BP(-)_TGAGTTTGACACGTCTCCCG	>LRP2BP(-)_TGAGTTTGACACGTCTCCCGGTAGTGCGCCCGCCCTTTAATCCTTACG	>LRP2BP(-)_GGTAGTGCGCCCGCCCTTTAATCCTTACG
chr17	78925386	78925387	TIMP2	2817	-	417	518	935	578	76	23	8	31	24	35	9	>TIMP2(-)_TCCGAGCGCAATAAAACTGC	>TIMP2(-)_TCCGAGCGCAATAAAACTGCGGCCCGGCCCAAGCCCGCAGCAAACACA	>TIMP2(-)_CGGCCCGGCCCAAGCCCGCAGCAAACACA
chr3	101849513	101849514	NFKBIZ	1586	+	380	538	918	753	125	21	10	31	114	59	12	>NFKBIZ(+)_CGGCCCGTTAAATACCCTGG	>NFKBIZ(+)_CGGCCCGTTAAATACCCTGGCAGTCCCGCGCCGCGCCCGTACTGGCCC	>NFKBIZ(+)_GCAGTCCCGCGCCGCGCCCGTACTGGCCC
chr19	33621952	33621953	CHST8	471	+	483	425	908	31	113	23	8	31	4	2	2	>CHST8(+)_GCGGCGCTATTTCCAGCCTC	>CHST8(+)_GCGGCGCTATTTCCAGCCTCGCCGGAGGCTTCGCTCTCACTTCGCTGG	>CHST8(+)_CGCCGGAGGCTTCGCTCTCACTTCGCTGG
chr1	44800373	44800374	PLK3	166	+	219	568	787	210	79	15	16	31	14	24	1	>PLK3(+)_GGCGTTCATTGATAAAACGC	>PLK3(+)_GGCGTTCATTGATAAAACGCTGGGCTCCCCTGGGCGCCAGCGCAGCGT	>PLK3(+)_CTGGGCTCCCCTGGGCGCCAGCGCAGCGT
chr21	26845408	26845409	ADAMTS1	1838	-	324	428	752	316	109	13	18	31	34	68	15	>ADAMTS1(-)_GGTCCACTATAAAAGGACCG	>ADAMTS1(-)_GGTCCACTATAAAAGGACCGCTCGGCTGCCCGGTTCTTGCACTCGCTG	>ADAMTS1(-)_GCTCGGCTGCCCGGTTCTTGCACTCGCTG
chr20	43457895	43457896	SRSF6	852	+	335	365	700	942	90	19	12	31	198	203	100	>SRSF6(+)_GCCGCCCATATAGCGAAAGC	>SRSF6(+)_GCCGCCCATATAGCGAAAGCCTGGCGCGCGCGCGCGCCATTGTGTGGC	>SRSF6(+)_CCTGGCGCGCGCGCGCGCCATTGTGTGGC
chr16	11586918	11586919	LITAF	2082	-	358	331	689	104	155	19	12	31	17	16	5	>LITAF(-)_GCCCGGCCCTTTTCTCGGGG	>LITAF(-)_GCCCGGCCCTTTTCTCGGGGCGCCCGAGAGGCCAGCTCAGACCTCCCG	>LITAF(-)_GCGCCCGAGAGGCCAGCTCAGACCTCCCG
chr17	74987631	74987632	CDR2L	1757	+	471	191	662	60	163	25	6	31	16	22	14	>CDR2L(+)_GCGGAGCCGAGCTCCGCAAG	>CDR2L(+)_GCGGAGCCGAGCTCCGCAAGCTGCAGGCGGGCTCCGCCAAGATGCAGC	>CDR2L(+)_GCTGCAGGCGGGCTCCGCCAAGATGCAGC
chr6	27133042	27133043	HIST1H2AG	706	+	262	398	660	238	123	25	6	31	25	30	7	>HIST1H2AG(+)_TAGTGTTTATAAAAAGCGCC	>HIST1H2AG(+)_TAGTGTTTATAAAAAGCGCCGCCTTTCCCGTTCACTTTGTGGTTGCTC	>HIST1H2AG(+)_CGCCTTTCCCGTTCACTTTGTGGTTGCTC
chr5	173888343	173888344	CPEB4	373	+	306	353	659	164	67	15	16	31	64	7	5	>CPEB4(+)_GAACCGGAAGTGTCTCTGGG	>CPEB4(+)_GAACCGGAAGTGTCTCTGGGTCTTTCCAGCTGGTTGTCATTTCACTCG	>CPEB4(+)_GTCTTTCCAGCTGGTTGTCATTTCACTCG
chr11	83157154	83157155	PCF11	918	+	218	426	644	74	184	12	19	31	9	6	3	>PCF11(+)_CCCTAGTTCATTTCGCACGA	>PCF11(+)_CCCTAGTTCATTTCGCACGACGCAGCGGTTGGGAACACAGACATTTTC	>PCF11(+)_ACGCAGCGGTTGGGAACACAGACATTTTC
chr2	202265770	202265771	NOP58	173	+	414	222	636	78	218	26	5	31	8	46	25	>NOP58(+)_CTCAGAGAAGGAGTAGCGCG	>NOP58(+)_CTCAGAGAAGGAGTAGCGCGTTCGTGCGTCCTAGTTCCAGTACAGCGT	>NOP58(+)_GTTCGTGCGTCCTAGTTCCAGTACAGCGT
chr14	96039361	96039362	C14orf132	907	+	247	366	613	90	151	19	12	31	23	17	6	>C14orf132(+)_CGCGCTCGGGGCCCTCCGCC	>C14orf132(+)_CGCGCTCGGGGCCCTCCGCCTAGTAGAGATCTGGAGCCAGAAGCCCAG	>C14orf132(+)_CTAGTAGAGATCTGGAGCCAGAAGCCCAG
chr4	57110384	57110385	IGFBP7	237	-	334	276	610	107	144	25	6	31	16	49	22	>IGFBP7(-)_GCGGCGGGTTTAAGGCGCCG	>IGFBP7(-)_GCGGCGGGTTTAAGGCGCCGGCCGGCCCGACACGGCTCACTCGCGCCC	>IGFBP7(-)_GGCCGGCCCGACACGGCTCACTCGCGCCC
chr7	143381346	143381347	ZYX	166	+	343	249	592	55	127	26	5	31	22	10	8	>ZYX(+)_CTCCCCGCCCGGCTGGAGGC	>ZYX(+)_CTCCCCGCCCGGCTGGAGGCTGCTCCGGACCGGGACGCAGAGTCTGCG	>ZYX(+)_CTGCTCCGGACCGGGACGCAGAGTCTGCG
chr8	47738163	47738164	CEBPD	1479	-	171	419	590	140	96	12	19	31	14	23	1	>CEBPD(-)_AGCCGGGGCTAGAAAAGGCG	>CEBPD(-)_AGCCGGGGCTAGAAAAGGCGGCGGGGCTGGGCCCAGCGAGGTGACAGC	>CEBPD(-)_GGCGGGGCTGGGCCCAGCGAGGTGACAGC
chr10	48306676	48306677	MAPK8	115	+	488	83	571	6	230	30	1	31	5	1	0	>MAPK8(+)_GACGTGCGCGGGCGTGCGCG	>MAPK8(+)_GACGTGCGCGGGCGTGCGCGGTGACGGCCCGCGTCTCTGTTACTCAGC	>MAPK8(+)_GGTGACGGCCCGCGTCTCTGTTACTCAGC
chr10	97446176	97446177	ZDHHC16	120	+	481	88	569	24	210	26	5	31	11	8	10	>ZDHHC16(+)_GCGGAACTTCAGAGGTCCAC	>ZDHHC16(+)_GCGGAACTTCAGAGGTCCACGCTGGCGCCTGCGCGTGTGGTTGAGGAT	>ZDHHC16(+)_CGCTGGCGCCTGCGCGTGTGGTTGAGGAT
chr2	241356284	241356285	FARP2	564	+	453	110	563	8	172	29	2	31	5	1	14	>FARP2(+)_TCAGGGCGGGGCGCGCTGCG	>FARP2(+)_TCAGGGCGGGGCGCGCTGCGCGGGGGCTGCCGGCGGGCAGTTGGGAGC	>FARP2(+)_GCGGGGGCTGCCGGCGGGCAGTTGGGAGC
chr2	42169374	42169375	EML4	43	+	455	106	561	2	189	30	1	31	3	5	0	>EML4(+)_CGGGGCGCGGCGCGGCGCGG	>EML4(+)_CGGGGCGCGGCGCGGCGCGGCGCTCGCGGCTGCTGCCTGGGAGGGAGG	>EML4(+)_GCGCTCGCGGCTGCTGCCTGGGAGGGAGG
chr22	20320022	20320023	DGCR6L	296	-	415	130	545	5	194	27	4	31	3	2	6	>DGCR6L(-)_CGCGCCGCGCTCGGGATGTC	>DGCR6L(-)_CGCGCCGCGCTCGGGATGTCGTGAAGCTGGGGGAGCTCGTCGCCGCCG	>DGCR6L(-)_CGTGAAGCTGGGGGAGCTCGTCGCCGCCG
chr4	74158117	74158118	MTHFD2L	1147	+	405	139	544	33	189	27	4	31	18	4	8	>MTHFD2L(+)_CGCGAGGACTGGAGTCGCGG	>MTHFD2L(+)_CGCGAGGACTGGAGTCGCGGGAGGTGGAGCCCCAGTCCGGAAGCCGGG	>MTHFD2L(+)_GGAGGTGGAGCCCCAGTCCGGAAGCCGGG
chr19	5622775	5622776	SAFB2	437	-	340	197	537	60	205	28	3	31	9	36	14	>SAFB2(-)_GAGTGCGTTTTCCTCTTAGG	>SAFB2(-)_GAGTGCGTTTTCCTCTTAGGCGGCGCCATTTTGTGTTCAGAGCCGCTA	>SAFB2(-)_GCGGCGCCATTTTGTGTTCAGAGCCGCTA
chr3	15065292	15065293	MRPS25	146	-	420	114	534	11	192	26	5	31	6	3	2	>MRPS25(-)_TCTCCTGTGCGTCTGCGCGG	>MRPS25(-)_TCTCCTGTGCGTCTGCGCGGGAAGTGGAACCTGGCTCTGGGGAGAAGC	>MRPS25(-)_GGAAGTGGAACCTGGCTCTGGGGAGAAGC
chr7	88220035	88220036	SRI	73	-	306	221	527	28	145	24	7	31	6	13	6	>SRI(-)_GAGAGGCCTGGCGCACAGGG	>SRI(-)_GAGAGGCCTGGCGCACAGGGCGAGGGCGGCTGCGGCGCAGTCTGCAGC	>SRI(-)_GCGAGGGCGGCTGCGGCGCAGTCTGCAGC
chr4	15002482	15002483	CPEB2	215	+	301	224	525	229	125	24	7	31	38	91	21	>CPEB2(+)_CGGGGTTCTTAAGCGGCCAG	>CPEB2(+)_CGGGGTTCTTAAGCGGCCAGGGCGGCTACGGCGACTGCGACGGCGGCG	>CPEB2(+)_GGGCGGCTACGGCGACTGCGACGGCGGCG
chr19	6531025	6531026	TNFSF9	602	+	284	224	508	370	124	23	8	31	25	36	15	>TNFSF9(+)_CAAGCAGCTATAAAAAGCGG	>TNFSF9(+)_CAAGCAGCTATAAAAAGCGGCGCGCTGTGTCTTCCCGCAGTCTCTCGT	>TNFSF9(+)_GCGCGCTGTGTCTTCCCGCAGTCTCTCGT
chr3	131381793	131381794	NUDT16	1242	+	369	138	507	26	171	27	4	31	9	12	15	>NUDT16(+)_CCCCTCTGCCCATTGGGCCT	>NUDT16(+)_CCCCTCTGCCCATTGGGCCTTCGGGACAGCAGAGGAGCAGTGTCCGGC	>NUDT16(+)_TTCGGGACAGCAGAGGAGCAGTGTCCGGC
chr9	133479098	133479099	SLC2A6	289	-	346	158	504	59	161	25	6	31	18	24	16	>SLC2A6(-)_CGGTGCCCTCGGAGCTGCTG	>SLC2A6(-)_CGGTGCCCTCGGAGCTGCTGGCCCCGGGCGGCTGCTCCAGTCTGAGCG	>SLC2A6(-)_GGCCCCGGGCGGCTGCTCCAGTCTGAGCG
chr6	30345159	30345160	RPP21	42	+	400	99	499	9	198	28	3	31	7	1	4	>RPP21(+)_CGGGGCTGTGCGAGGGGTGG	>RPP21(+)_CGGGGCTGTGCGAGGGGTGGGGCTGCGGGAGGCCCTGGAGCGCGGCGG	>RPP21(+)_GGGCTGCGGGAGGCCCTGGAGCGCGGCGG
chr15	72783711	72783712	ADPGK	42	-	432	65	497	12	225	30	1	31	4	7	4	>ADPGK(-)_CGGAAGAGGCGCGGGCTAGG	>ADPGK(-)_CGGAAGAGGCGCGGGCTAGGAAAGGAGTTGGTTCGCGCAGGTGCGGCG	>ADPGK(-)_GAAAGGAGTTGGTTCGCGCAGGTGCGGCG
chr5	151686914	151686915	SPARC	3655	-	245	249	494	47	102	20	11	31	7	31	18	>SPARC(-)_GCCTGTCTCTAAACCCCTCC	>SPARC(-)_GCCTGTCTCTAAACCCCTCCACATTCCCGCGGTCCTTCAGACTGCCCG	>SPARC(-)_CACATTCCCGCGGTCCTTCAGACTGCCCG
chr15	82809639	82809640	WHAMM	208	+	333	153	486	48	129	28	3	31	4	12	8	>WHAMM(+)_GCTGGGGCACTGACGCGGTT	>WHAMM(+)_GCTGGGGCACTGACGCGGTTTCGATTCTAGCGAAAAATGATTTGGCTC	>WHAMM(+)_TTCGATTCTAGCGAAAAATGATTTGGCTC
chr2	178451152	178451153	PRKRA	51	-	388	95	483	9	207	30	1	31	10	8	3	>PRKRA(-)_CCCCACCCTGCCTGCCCCCT	>PRKRA(-)_CCCCACCCTGCCTGCCCCCTCGCTGGAGCAACGCAAGCAGGAGGCGGG	>PRKRA(-)_TCGCTGGAGCAACGCAAGCAGGAGGCGGG
chr20	31514456	31514457	HM13	67	+	350	124	474	8	233	27	4	31	4	9	7	>HM13(+)_GCGGGCTTGGGAGGGAGCAC	>HM13(+)_GCGGGCTTGGGAGGGAGCACGTCACTTCCTGTTGCCTTAGGGGAACGT	>HM13(+)_CGTCACTTCCTGTTGCCTTAGGGGAACGT
chr3	49022120	49022121	NDUFAF3	90	+	404	64	468	21	181	26	5	31	5	18	10	>NDUFAF3(+)_AGGGCCCTCCCAACCCGGGG	>NDUFAF3(+)_AGGGCCCTCCCAACCCGGGGACTAACGGCGCCGGTGACGACTTCGCCG	>NDUFAF3(+)_GACTAACGGCGCCGGTGACGACTTCGCCG
chr17	83051733	83051734	B3GNTL1	526	-	310	156	466	10	174	29	2	31	1	4	3	>B3GNTL1(-)_GCGTCCGAGGAGAGCCAGGC	>B3GNTL1(-)_GCGTCCGAGGAGAGCCAGGCCATGCAGGCCCACGTGGTAGGTGCCAGC	>B3GNTL1(-)_CCATGCAGGCCCACGTGGTAGGTGCCAGC
chr22	20859005	20859006	SNAP29	58	+	412	54	466	10	133	27	4	31	3	6	0	>SNAP29(+)_TCCGAGGGCGGGGCCACCTG	>SNAP29(+)_TCCGAGGGCGGGGCCACCTGCGCGCGACGCGCGGAAGGAGTTCGCGCG	>SNAP29(+)_GCGCGCGACGCGCGGAAGGAGTTCGCGCG
chr6	81752680	81752681	TENT5A	142	-	244	220	464	107	130	27	4	31	8	28	12	>TENT5A(-)_AAGCCCGGTATAAAAAAAGT	>TENT5A(-)_AAGCCCGGTATAAAAAAAGTACTGAAGACATTTTCCCCGCACAACTGC	>TENT5A(-)_TACTGAAGACATTTTCCCCGCACAACTGC
chr9	109119949	109119950	TMEM245	298	-	354	108	462	35	191	24	7	31	4	19	4	>TMEM245(-)_CCGCCCTGCCTCCCGCCCGC	>TMEM245(-)_CCGCCCTGCCTCCCGCCCGCGTTTCTAGCCCGACTCCCATTACCGCCC	>TMEM245(-)_CGTTTCTAGCCCGACTCCCATTACCGCCC
chr9	15510969	15510970	PSIP1	230	-	363	90	453	33	229	27	4	31	3	33	22	>PSIP1(-)_CCCCAGTGCTAGCGGGCGCC	>PSIP1(-)_CCCCAGTGCTAGCGGGCGCCGAGCGGGAGCCGCGCGGGAGCAGCGCAG	>PSIP1(-)_CGAGCGGGAGCCGCGCGGGAGCAGCGCAG
chr9	99906670	99906671	STX17	75	+	358	90	448	3	241	29	2	31	3	0	0	>STX17(+)_CTCGTGATGCCCCGCCCCGT	>STX17(+)_CTCGTGATGCCCCGCCCCGTCGCTCCTGCGCCTGCGCCGTGCCCACCG	>STX17(+)_TCGCTCCTGCGCCTGCGCCGTGCCCACCG
chr7	44200995	44200996	YKT6	95	+	354	91	445	6	171	26	5	31	3	6	2	>YKT6(+)_GGCTGACCGGATCCGGAAGT	>YKT6(+)_GGCTGACCGGATCCGGAAGTGGATTGCGAGCCAGGAGGAGGAAGCCGG	>YKT6(+)_TGGATTGCGAGCCAGGAGGAGGAAGCCGG
chr1	145095307	145095308	SRGAP2B	173	-	328	116	444	27	271	29	2	31	8	13	8	>SRGAP2B(-)_GCGGAGGCTCCTCCAGGGAC	>SRGAP2B(-)_GCGGAGGCTCCTCCAGGGACTGGGGCACAGATCTGCGTAGAAACGGGT	>SRGAP2B(-)_CTGGGGCACAGATCTGCGTAGAAACGGGT
chr18	23453286	23453287	RIOK3	225	+	341	102	443	64	198	28	3	31	15	16	7	>RIOK3(+)_CGACTGTCCTAGCGAAGAGG	>RIOK3(+)_CGACTGTCCTAGCGAAGAGGGCGGAAGAGGAGAGATCCAGTTCCGGAC	>RIOK3(+)_GGCGGAAGAGGAGAGATCCAGTTCCGGAC
chr3	156674589	156674590	TIPARP	157	+	173	266	439	91	143	20	11	31	32	57	13	>TIPARP(+)_GGGCCGTCGGGAGGAGGCGA	>TIPARP(+)_GGGCCGTCGGGAGGAGGCGACCGGAAGCCACTTAAAGCAGAGATCGAG	>TIPARP(+)_ACCGGAAGCCACTTAAAGCAGAGATCGAG
chr2	1744512	1744513	PXDN	809	-	278	156	434	71	165	25	6	31	17	18	9	>PXDN(-)_GCGCACAGCTGGGACGTGGG	>PXDN(-)_GCGCACAGCTGGGACGTGGGCCGCGGCCGGGCGGGCGCAGTCGGGAGC	>PXDN(-)_GCCGCGGCCGGGCGGGCGCAGTCGGGAGC
chr2	97646061	97646062	COX5B	113	+	321	108	429	77	194	28	3	31	27	10	8	>COX5B(+)_CCCGGAAGTCCCTCCTGTCT	>COX5B(+)_CCCGGAAGTCCCTCCTGTCTCTGCAGCTTGTTCCCGGAAGTTTTGCTG	>COX5B(+)_TCTGCAGCTTGTTCCCGGAAGTTTTGCTG
chr3	125520201	125520202	SNX4	75	-	385	41	426	31	286	31	0	31	9	3	2	>SNX4(-)_AGAGACTGGTTGGCCGCGGG	>SNX4(-)_AGAGACTGGTTGGCCGCGGGCGCGGCGGCGGCGCAGGCGCACTGGGTT	>SNX4(-)_GCGCGGCGGCGGCGCAGGCGCACTGGGTT
chr14	24429953	24429954	KHNYN	663	+	348	78	426	3	242	29	2	31	7	8	2	>KHNYN(+)_GCTGACTCCGCCCCAGGCCA	>KHNYN(+)_GCTGACTCCGCCCCAGGCCAGGAAGTGACTCAAGAAACAGTTTGCGTG	>KHNYN(+)_AGGAAGTGACTCAAGAAACAGTTTGCGTG
chr11	62573860	62573861	EEF1G	85	-	170	255	425	111	176	20	11	31	52	24	19	>EEF1G(-)_GGCGGCTTACTTTGCGGCAG	>EEF1G(-)_GGCGGCTTACTTTGCGGCAGCGCCGAGAACCCCACCCCCTTTCTTTGC	>EEF1G(-)_GCGCCGAGAACCCCACCCCCTTTCTTTGC
chr16	18562096	18562097	NOMO2	298	-	327	96	423	89	273	26	5	31	17	15	9	>NOMO2(-)_TCAGCCGGCCTAGGAGGAGG	>NOMO2(-)_TCAGCCGGCCTAGGAGGAGGAAGGAGCCTGCGGCGTGCAGTGTGAGGG	>NOMO2(-)_GAAGGAGCCTGCGGCGTGCAGTGTGAGGG
chr1	27490145	27490146	WASF2	187	-	270	151	421	30	174	28	3	31	19	26	37	>WASF2(-)_GGCGGGGTGTGGCTGCCGCC	>WASF2(-)_GGCGGGGTGTGGCTGCCGCCCAGGGCGGGGAATCGCGTAATGGCGGAC	>WASF2(-)_CCAGGGCGGGGAATCGCGTAATGGCGGAC
chr12	69239571	69239572	CPSF6	344	+	298	123	421	21	92	23	8	31	15	0	10	>CPSF6(+)_GGCCTCGGAAGTGACGCAAG	>CPSF6(+)_GGCCTCGGAAGTGACGCAAGCGCCCCCCCACCGCCGCTAGATCCGCTG	>CPSF6(+)_GCGCCCCCCCACCGCCGCTAGATCCGCTG
chr7	104207980	104207981	ORC5	171	-	262	155	417	44	166	25	6	31	25	5	4	>ORC5(-)_CGCTGCGGGTCCGGTTTCCG	>ORC5(-)_CGCTGCGGGTCCGGTTTCCGGCGGGAGCGTGGGCCGCCAGACTCGGGA	>ORC5(-)_GGCGGGAGCGTGGGCCGCCAGACTCGGGA
chr4	932291	932292	GAK	47	-	338	75	413	15	178	22	9	31	5	5	14	>GAK(-)_CTCACGGGCGCCTACGTCAC	>GAK(-)_CTCACGGGCGCCTACGTCACGGCGTCGAGGCGGAAGATGGTGCACCTC	>GAK(-)_CGGCGTCGAGGCGGAAGATGGTGCACCTC
chr2	69387216	69387217	GFPT1	62	-	318	94	412	31	208	29	2	31	9	12	13	>GFPT1(-)_CGGTTGCTGGCGGAGCCCGG	>GFPT1(-)_CGGTTGCTGGCGGAGCCCGGGAGGCGGAGAAGGCTGTCGTTGCCTTGG	>GFPT1(-)_GGAGGCGGAGAAGGCTGTCGTTGCCTTGG
chr19	1021122	1021123	TMEM259	105	-	283	127	410	13	169	27	4	31	10	8	3	>TMEM259(-)_GTGGCGACTCGCTAGCGTCA	>TMEM259(-)_GTGGCGACTCGCTAGCGTCAGCAGCGCCGCAGCCGGACGAGAAAGCGG	>TMEM259(-)_AGCAGCGCCGCAGCCGGACGAGAAAGCGG
chr7	73578575	73578576	TBL2	368	-	277	131	408	46	176	27	4	31	17	13	11	>TBL2(-)_CGGCCCGGCAGAGCCGTGCG	>TBL2(-)_CGGCCCGGCAGAGCCGTGCGGGCGCCCGCGTACTCACTAGCTGAGGTG	>TBL2(-)_GGGCGCCCGCGTACTCACTAGCTGAGGTG
chr16	28822720	28822721	ATXN2L	61	+	264	143	407	24	200	22	9	31	6	12	7	>ATXN2L(+)_CCTTCCTCTGGCGCCTTCGG	>ATXN2L(+)_CCTTCCTCTGGCGCCTTCGGCTCCTCCCCCTGCGCCTCACACGCTCAT	>ATXN2L(+)_GCTCCTCCCCCTGCGCCTCACACGCTCAT
chr7	95434986	95434987	PON2	35	-	360	47	407	7	201	30	1	31	0	13	7	>PON2(-)_GAGCCGGGAAGATGGCACCG	>PON2(-)_GAGCCGGGAAGATGGCACCGCCCACGGAGCTGCTGGCCAGGCCGGAGC	>PON2(-)_GCCCACGGAGCTGCTGGCCAGGCCGGAGC
chr5	15500190	15500191	FBXL7	134	+	268	138	406	21	195	27	4	31	9	26	9	>FBXL7(+)_CAAAAGTCCGGCCCGCGGGC	>FBXL7(+)_CAAAAGTCCGGCCCGCGGGCGAGCTGCGCCGGGTCGCTAGTCTTCACT	>FBXL7(+)_CGAGCTGCGCCGGGTCGCTAGTCTTCACT
chr17	81295298	81295299	SLC38A10	126	-	334	72	406	15	202	29	2	31	14	7	11	>SLC38A10(-)_CACTTCCGGGCAACGGAGCC	>SLC38A10(-)_CACTTCCGGGCAACGGAGCCCGTGGAAGGCGGAAGTGTGAGCGCCGCG	>SLC38A10(-)_CCGTGGAAGGCGGAAGTGTGAGCGCCGCG
chr20	50113145	50113146	UBE2V1	233	-	282	124	406	4	203	27	4	31	4	3	9	>UBE2V1(-)_GGACGGGTAAGGGGGGGGTG	>UBE2V1(-)_GGACGGGTAAGGGGGGGGTGAAGAAGGGGCCGGCCTTCAAGCAAGAGC	>UBE2V1(-)_GAAGAAGGGGCCGGCCTTCAAGCAAGAGC
chr17	43778944	43778945	DUSP3	101	-	249	155	404	26	122	23	8	31	10	16	12	>DUSP3(-)_TGATCCGCCGCTCTCCGCCT	>DUSP3(-)_TGATCCGCCGCTCTCCGCCTCGCTTGCTCCTGCCGGGCGTGCAGGGCC	>DUSP3(-)_TCGCTTGCTCCTGCCGGGCGTGCAGGGCC
chr3	59050024	59050025	C3orf67	105	-	328	76	404	23	162	28	3	31	5	6	6	>C3orf67(-)_GAACGCGGGTGGCGCTCGGC	>C3orf67(-)_GAACGCGGGTGGCGCTCGGCGCTGCTCTTTCGCGGTTTGATTCTGGGG	>C3orf67(-)_CGCTGCTCTTTCGCGGTTTGATTCTGGGG
chr2	241686786	241686787	DTYMK	51	-	327	73	400	19	214	29	2	31	2	10	12	>DTYMK(-)_GGAAGGCTGCGTGGAGACGC	>DTYMK(-)_GGAAGGCTGCGTGGAGACGCCAGCGGCGGGCGGTGGACAGTCATGGCG	>DTYMK(-)_CCAGCGGCGGGCGGTGGACAGTCATGGCG
chr11	76783327	76783328	TSKU	77	+	339	61	400	7	131	27	4	31	0	6	2	>TSKU(+)_TGCGGGCGGGGACCGGGGGG	>TSKU(+)_TGCGGGCGGGGACCGGGGGGCGGGCCGCGCCGCGCGGAGAAAAGCGCT	>TSKU(+)_GCGGGCCGCGCCGCGCGGAGAAAAGCGCT
chr12	122980702	122980703	ARL6IP4	104	+	304	65	369	14	212	26	5	31	4	4	8	>ARL6IP4(+)_CGCCCCGGCCGGAAGCCTCC	>ARL6IP4(+)_CGCCCCGGCCGGAAGCCTCCTCGCCGCCGCTTCCTCTCGAGAAGGCGC	>ARL6IP4(+)_CTCGCCGCCGCTTCCTCTCGAGAAGGCGC
chr12	71663847	71663848	ZFC3H1	157	-	228	139	367	45	177	23	8	31	3	24	6	>ZFC3H1(-)_GTACAGCCGCTACCAGAGTC	>ZFC3H1(-)_GTACAGCCGCTACCAGAGTCCCTTTCTCGCGAGGCGGAAGAACCCCGA	>ZFC3H1(-)_CCCTTTCTCGCGAGGCGGAAGAACCCCGA
chr1	31938347	31938348	PTP4A2	79	-	268	97	365	20	122	25	6	31	12	3	3	>PTP4A2(-)_CGGCGGCGGGAGCTGGTTCC	>PTP4A2(-)_CGGCGGCGGGAGCTGGTTCCGGCTGCGCGCGCAGCGGTGGTGGTGGCG	>PTP4A2(-)_CGGCTGCGCGCGCAGCGGTGGTGGTGGCG
chr14	23057519	23057520	CDH24	130	-	330	33	363	21	107	30	1	31	3	10	6	>CDH24(-)_CCCTCCGTCTCGCTCCCTTG	>CDH24(-)_CCCTCCGTCTCGCTCCCTTGTTCTCGCCGGGGCCGCTCAGACCTGCAG	>CDH24(-)_GTTCTCGCCGGGGCCGCTCAGACCTGCAG
chr1	43974959	43974960	ATP6V0B	320	+	257	104	361	20	186	29	2	31	15	8	8	>ATP6V0B(+)_ACGTGGGCGAGTTAGGTGAC	>ATP6V0B(+)_ACGTGGGCGAGTTAGGTGACGCTGCGGGGCGGGCGGACAGACTGCGGG	>ATP6V0B(+)_CGCTGCGGGGCGGGCGGACAGACTGCGGG
chr22	37658723	37658724	PDXP	116	+	298	61	359	24	153	30	1	31	2	14	0	>PDXP(+)_CAGCGCGCCAATTGGCGGCT	>PDXP(+)_CAGCGCGCCAATTGGCGGCTGCGTGGAACGTGCCAGGGAGAGCGCGCC	>PDXP(+)_TGCGTGGAACGTGCCAGGGAGAGCGCGCC
chr11	78079848	78079849	NDUFC2	44	-	257	92	349	3	177	25	6	31	2	5	4	>NDUFC2(-)_CTGCACCGCGCTGCGCCGTG	>NDUFC2(-)_CTGCACCGCGCTGCGCCGTGCCCGTGAGTCCGGCGCGCAGAGGAGGAG	>NDUFC2(-)_GCCCGTGAGTCCGGCGCGCAGAGGAGGAG
chr11	78079848	78079849	NDUFC2-KCTD14	44	-	257	92	349	3	177	25	6	31	2	5	4	>NDUFC2-KCTD14(-)_CTGCACCGCGCTGCGCCGTG	>NDUFC2-KCTD14(-)_CTGCACCGCGCTGCGCCGTGCCCGTGAGTCCGGCGCGCAGAGGAGGAG	>NDUFC2-KCTD14(-)_GCCCGTGAGTCCGGCGCGCAGAGGAGGAG
chr3	4467252	4467253	SUMF1	19	-	262	74	336	2	275	27	4	31	3	9	5	>SUMF1(-)_GGGCTCAGCCACGTGACCAA	>SUMF1(-)_GGGCTCAGCCACGTGACCAACCGGGTCACATGGCCCGCGGGACAACAT	>SUMF1(-)_ACCGGGTCACATGGCCCGCGGGACAACAT
chr12	62466834	62466835	MON2	103	+	253	81	334	8	219	31	0	31	6	10	9	>MON2(+)_GTGTCCCGGCAGCGCTCGGA	>MON2(+)_GTGTCCCGGCAGCGCTCGGAATTGTGGGCGACTCGGCTAATGGCGTCG	>MON2(+)_AATTGTGGGCGACTCGGCTAATGGCGTCG
chr16	70801148	70801149	VAC14	56	-	216	113	329	12	215	27	4	31	6	5	4	>VAC14(-)_CGGAAGGCGGAAGTGCTGTA	>VAC14(-)_CGGAAGGCGGAAGTGCTGTAGAGTCATGTGACTCGAGTAACATGGCCG	>VAC14(-)_AGAGTCATGTGACTCGAGTAACATGGCCG
chr11	70203314	70203315	FADD	157	+	213	115	328	15	134	24	7	31	7	3	5	>FADD(+)_AGATAACGGTCGAAAACGCG	>FADD(+)_AGATAACGGTCGAAAACGCGCTCTTGTCGATTTCCTGTAGTGAATCAG	>FADD(+)_GCTCTTGTCGATTTCCTGTAGTGAATCAG
chr11	63839125	63839126	MARK2	27	+	267	60	327	13	212	29	2	31	10	9	22	>MARK2(+)_CCGGCGAAAAGAGCCGAGGG	>MARK2(+)_CCGGCGAAAAGAGCCGAGGGCCGGCGGTGGTGGCGGCCATGTTGGGAG	>MARK2(+)_GCCGGCGGTGGTGGCGGCCATGTTGGGAG
chr8	43093514	43093515	POMK	257	+	247	76	323	23	195	31	0	31	15	19	20	>POMK(+)_CCAGGACGCGCTTCCGAACG	>POMK(+)_CCAGGACGCGCTTCCGAACGCGCAAGCGCAGTAGGCCCAGTGCGTGCT	>POMK(+)_GCGCAAGCGCAGTAGGCCCAGTGCGTGCT
chr10	101818441	101818442	OGA	268	-	148	174	322	39	163	29	2	31	13	11	2	>OGA(-)_GGACCGGTCTGAGCCGGTCT	>OGA(-)_GGACCGGTCTGAGCCGGTCTGCAGCGCAAGCGCAGTGCGGATAAACAG	>OGA(-)_TGCAGCGCAAGCGCAGTGCGGATAAACAG
chr14	73458552	73458553	NUMB	55	-	204	117	321	15	168	23	8	31	6	20	10	>NUMB(-)_AGGGTGGGCCTGTTGTCATG	>NUMB(-)_AGGGTGGGCCTGTTGTCATGGGGGAGGTGGTGGCGCTTGGTGGCCACT	>NUMB(-)_GGGGGAGGTGGTGGCGCTTGGTGGCCACT
chr5	1112063	1112064	SLC12A7	72	-	296	23	319	2	167	30	1	31	4	1	3	>SLC12A7(-)_GGGGCGGGGCGGCTCGGTCG	>SLC12A7(-)_GGGGCGGGGCGGCTCGGTCGGACCCCGCCCCTGCCTCCAAGTCCCGTG	>SLC12A7(-)_GGACCCCGCCCCTGCCTCCAAGTCCCGTG
chr17	78168598	78168599	SYNGR2	47	+	260	58	318	10	137	27	4	31	3	11	2	>SYNGR2(+)_GGCGCCGGGCAGGTTCCTCT	>SYNGR2(+)_GGCGCCGGGCAGGTTCCTCTGCGTTCCGCGGCGGCGGCAGCGGCGGCG	>SYNGR2(+)_TGCGTTCCGCGGCGGCGGCAGCGGCGGCG
chr10	100912962	100912963	SLF2	239	+	212	99	311	189	91	29	2	31	41	26	8	>SLF2(+)_TACTGGTCCCCAGGTTCCTT	>SLF2(+)_TACTGGTCCCCAGGTTCCTTCCCGCTCACGCCGGAGTCACTTCCGAAG	>SLF2(+)_TCCCGCTCACGCCGGAGTCACTTCCGAAG
chr19	55654131	55654132	U2AF2	137	+	240	63	303	3	153	27	4	31	1	6	3	>U2AF2(+)_GTTTCCCCTCACCCGCGGCT	>U2AF2(+)_GTTTCCCCTCACCCGCGGCTTCCACCCTGCGCAGGCGCAAAAAGCCGC	>U2AF2(+)_TTCCACCCTGCGCAGGCGCAAAAAGCCGC
chr19	41439904	41439905	DMAC2	71	-	243	49	292	31	281	30	1	31	16	0	2	>DMAC2(-)_CGTGGGATAAGACCGGCCCC	>DMAC2(-)_CGTGGGATAAGACCGGCCCCTTCCGGTTACGAAACCTTAGCAAGATGG	>DMAC2(-)_CTTCCGGTTACGAAACCTTAGCAAGATGG
chr11	72103275	72103276	LAMTOR1	70	-	209	83	292	6	163	27	4	31	0	3	7	>LAMTOR1(-)_GGAGGCCGCCGCGGGTCATG	>LAMTOR1(-)_GGAGGCCGCCGCGGGTCATGTGACCGGAAGGGCTCCTCACGGACGCCG	>LAMTOR1(-)_GTGACCGGAAGGGCTCCTCACGGACGCCG
chr13	49997047	49997048	TRIM13	103	+	205	86	291	13	185	28	3	31	4	11	7	>TRIM13(+)_AGAGGGAAGGGGGCGGAGCT	>TRIM13(+)_AGAGGGAAGGGGGCGGAGCTAGCCGGAGCCGCGAGTCCATTTTGGGGC	>TRIM13(+)_TAGCCGGAGCCGCGAGTCCATTTTGGGGC
chr21	25734903	25734904	ATP5PF	250	-	172	108	280	39	122	22	9	31	15	11	6	>ATP5PF(-)_GCGGGTAGGCGTGTGGGGGC	>ATP5PF(-)_GCGGGTAGGCGTGTGGGGGCGGAGCCAGGGCCGGAAGTAGAGCGGAGG	>ATP5PF(-)_CGGAGCCAGGGCCGGAAGTAGAGCGGAGG
chr6	170553271	170553272	PSMB1	42	-	197	76	273	4	214	25	6	31	3	5	5	>PSMB1(-)_AACGTCCGGTCAAGGCAGCC	>PSMB1(-)_AACGTCCGGTCAAGGCAGCCATCTCGCCGTGAGACAGCAAGTGTCGGA	>PSMB1(-)_CATCTCGCCGTGAGACAGCAAGTGTCGGA
chr1	153658716	153658717	SNAPIN	70	+	231	37	268	2	237	28	3	31	1	2	6	>SNAPIN(+)_AGTGCGGCGCGGCTCCGGTT	>SNAPIN(+)_AGTGCGGCGCGGCTCCGGTTCCCGGCGGCCCTCGCGGCAGGTTTCGGG	>SNAPIN(+)_TCCCGGCGGCCCTCGCGGCAGGTTTCGGG
chr15	75368606	75368607	MAN2C1	48	-	179	85	264	3	131	26	5	31	7	2	2	>MAN2C1(-)_CCTGCCGTGGAGCGGAACGG	>MAN2C1(-)_CCTGCCGTGGAGCGGAACGGTAGCGCCAGGGGCCTTCCGGAAAGAGGA	>MAN2C1(-)_GTAGCGCCAGGGGCCTTCCGGAAAGAGGA
chr15	49621047	49621048	DTWD1	110	+	167	92	259	7	156	26	5	31	5	3	0	>DTWD1(+)_GTCTCCCGGAAAGCGCTCCG	>DTWD1(+)_GTCTCCCGGAAAGCGCTCCGTCTGGTCCGTGCGCGATCACGGCCCGGC	>DTWD1(+)_GTCTGGTCCGTGCGCGATCACGGCCCGGC
chr2	219218957	219218958	ABCB6	188	-	185	67	252	30	87	25	6	31	9	9	5	>ABCB6(-)_CTACAGCCGTGGAGCGCGGT	>ABCB6(-)_CTACAGCCGTGGAGCGCGGTGCGAGTCCAACACCGAGCATTCCCGTGG	>ABCB6(-)_TGCGAGTCCAACACCGAGCATTCCCGTGG
chr16	71845975	71845976	ATXN1L	30	+	196	31	227	2	182	29	2	31	4	0	0	>ATXN1L(+)_CAATCTCTCCGCGCCGGGGG	>ATXN1L(+)_CAATCTCTCCGCGCCGGGGGCGGGACGAGCTTGACGCCATCTCCGGGC	>ATXN1L(+)_GCGGGACGAGCTTGACGCCATCTCCGGGC
chr6	159762044	159762045	ACAT2	31	+	150	70	220	19	127	27	4	31	4	10	6	>ACAT2(+)_CGCGGCAGGCCTGTGGGCTG	>ACAT2(+)_CGCGGCAGGCCTGTGGGCTGCGAGGAGGAGCTTTGCCTAGCTTGCAGG	>ACAT2(+)_GCGAGGAGGAGCTTTGCCTAGCTTGCAGG
chr7	42912062	42912063	C7orf25	19	-	157	47	204	7	157	26	5	31	0	1	2	>C7orf25(-)_GCAGGTTTGGCGTCACCCGG	>C7orf25(-)_GCAGGTTTGGCGTCACCCGGCCCGGAACCACGTGATGCAGGAGGTGCC	>C7orf25(-)_GCCCGGAACCACGTGATGCAGGAGGTGCC
chr17	55421930	55421931	MMD	25	-	175	23	198	5	171	29	2	31	1	7	5	>MMD(-)_AGGAGCCCCGGGGCGGAGGA	>MMD(-)_AGGAGCCCCGGGGCGGAGGAGCCGGGGAGGCGGGAGGCGGGAGGCGGG	>MMD(-)_AGCCGGGGAGGCGGGAGGCGGGAGGCGGG
chr19	17215401	17215402	USE1	59	+	175	16	191	6	148	30	1	31	2	4	1	>USE1(+)_AACATGGAGCCGGCGGAAGG	>USE1(+)_AACATGGAGCCGGCGGAAGGGGTGGTGTAGGGCCGGGCGATAATGGCG	>USE1(+)_GGGTGGTGTAGGGCCGGGCGATAATGGCG
chrX	48574483	48574484	RBM3	89	+	103	46	149	10	70	26	5	31	1	21	10	>RBM3(+)_AGGGGAACGTTCCGGGACGT	>RBM3(+)_AGGGGAACGTTCCGGGACGTTCTCGCTACGTACTCTTTATCAATCGTC	>RBM3(+)_TTCTCGCTACGTACTCTTTATCAATCGTC
chr11	65576052	65576053	EHBP1L1	53	+	118	27	145	6	160	24	7	31	2	0	3	>EHBP1L1(+)_CCGGAGCCCCGCCCGCCTTC	>EHBP1L1(+)_CCGGAGCCCCGCCCGCCTTCCGACGGGGGTGCGGCTCCAGGAAACGGC	>EHBP1L1(+)_CCGACGGGGGTGCGGCTCCAGGAAACGGC
chr15	72197812	72197813	GRAMD2A	5	-	77	35	112	0	109	28	3	31	1	0	1	>GRAMD2A(-)_CGGGCTCTCGACGGGGCGGG	>GRAMD2A(-)_CGGGCTCTCGACGGGGCGGGCGGGGTCCGGCGGGCGCTGGGTCCCGGC	>GRAMD2A(-)_GCGGGGTCCGGCGGGCGCTGGGTCCCGGC
chr11	61967630	61967631	FTH1	2154	-	331	693	1024	968	80	14	16	30	108	105	21	>FTH1(-)_GACGCGGCTATAAGAGACCA	>FTH1(-)_GACGCGGCTATAAGAGACCACAAGCGACCCGCAGGGCCAGACGTTCTT	>FTH1(-)_ACAAGCGACCCGCAGGGCCAGACGTTCTT
chr8	135457455	135457456	KHDRBS3	707	+	432	567	999	24	103	22	8	30	17	21	0	>KHDRBS3(+)_GGCCGGCGGCAGGCGCTGGG	>KHDRBS3(+)_GGCCGGCGGCAGGCGCTGGGCGCTCGGCGCGGTGGCTCAGAGTGCGCG	>KHDRBS3(+)_GCGCTCGGCGCGGTGGCTCAGAGTGCGCG
chr6	31862816	31862817	NEU1	476	-	381	507	888	262	129	18	12	30	24	54	14	>NEU1(-)_GCGCTTTAAAGGGTCCGGGT	>NEU1(-)_GCGCTTTAAAGGGTCCGGGTCAGCTGACTCCCGACTCTGTGGAGTCTA	>NEU1(-)_TCAGCTGACTCCCGACTCTGTGGAGTCTA
chr22	37675635	37675636	LGALS1	1859	+	204	595	799	354	63	19	11	30	37	68	23	>LGALS1(+)_TCCGGTCCAGTTAAAAGGGT	>LGALS1(+)_TCCGGTCCAGTTAAAAGGGTGGGAGCGTCCGGGGGCCCATCTCTCTCG	>LGALS1(+)_TGGGAGCGTCCGGGGGCCCATCTCTCTCG
chr1	8026308	8026309	ERRFI1	968	-	240	481	721	1478	80	18	12	30	98	93	14	>ERRFI1(-)_CCTATGCTATATATAGAGGC	>ERRFI1(-)_CCTATGCTATATATAGAGGCGGCGGCGGCAGCCGCGGCGACGGCGGTC	>ERRFI1(-)_CGGCGGCGGCAGCCGCGGCGACGGCGGTC
chr11	62546805	62546806	AHNAK	1214	-	287	389	676	252	125	19	11	30	42	36	11	>AHNAK(-)_GCCGGAGTTACAAGAGCCGC	>AHNAK(-)_GCCGGAGTTACAAGAGCCGCCTCCGCGCACGGGGGCCCGGCCACTCGG	>AHNAK(-)_CCTCCGCGCACGGGGGCCCGGCCACTCGG
chr3	129316285	129316286	H1FX	5999	-	242	421	663	520	130	14	16	30	55	70	12	>H1FX(-)_ATGAAGCTATAAAAAGCCGA	>H1FX(-)_ATGAAGCTATAAAAAGCCGAGAGAAGCGCCCTCCCGCCAGAGCGCAGC	>H1FX(-)_AGAGAAGCGCCCTCCCGCCAGAGCGCAGC
chr12	27244292	27244293	STK38L	262	+	481	161	642	4	146	26	4	30	2	8	5	>STK38L(+)_GAGAAGGGAGCTGACGGGCG	>STK38L(+)_GAGAAGGGAGCTGACGGGCGCCCGGCCGGCTGCGGTCCGTGCGGAGGC	>STK38L(+)_GCCCGGCCGGCTGCGGTCCGTGCGGAGGC
chr6	29942531	29942532	HLA-A	2238	+	177	457	634	279	65	15	15	30	48	3	2	>HLA-A(+)_GTCGCTGTTCTAAAGCCCGC	>HLA-A(+)_GTCGCTGTTCTAAAGCCCGCACGCACCCACCGGGACTCAGATTCTCCC	>HLA-A(+)_CACGCACCCACCGGGACTCAGATTCTCCC
chr14	20469405	20469406	PNP	571	+	196	425	621	392	131	15	15	30	39	63	9	>PNP(+)_GGGCAAGGGATATAAGCCAG	>PNP(+)_GGGCAAGGGATATAAGCCAGAGCCTAGACCAGTGAGCCAACTGTGCGA	>PNP(+)_GAGCCTAGACCAGTGAGCCAACTGTGCGA
chr2	176002255	176002256	LNPK	134	-	465	142	607	36	242	27	3	30	5	36	24	>LNPK(-)_TTTCATGGGAAGGAGTTGGC	>LNPK(-)_TTTCATGGGAAGGAGTTGGCCCGGCTTGTCTCTCTGTCAGTGGCGGCT	>LNPK(-)_CCCGGCTTGTCTCTCTGTCAGTGGCGGCT
chr6	26045387	26045388	HIST1H3C	128	+	209	327	536	275	107	19	11	30	30	44	11	>HIST1H3C(+)_ACTATATTTAAAGGCCACTT	>HIST1H3C(+)_ACTATATTTAAAGGCCACTTGCTCTCAGTTCACTACACTTTTGTGTGT	>HIST1H3C(+)_TGCTCTCAGTTCACTACACTTTTGTGTGT
chr11	33736422	33736423	CD59	1220	-	241	288	529	64	156	18	12	30	11	6	5	>CD59(-)_CTTGCGGGCTGGAGCGAAAG	>CD59(-)_CTTGCGGGCTGGAGCGAAAGAATGCGGGGGCTGAGCGCAGAAGCGGCT	>CD59(-)_GAATGCGGGGGCTGAGCGCAGAAGCGGCT
chr4	99950272	99950273	H2AFZ	289	-	229	298	527	589	94	23	7	30	48	118	32	>H2AFZ(-)_TGCAGTATAAAGGGAGCAGG	>H2AFZ(-)_TGCAGTATAAAGGGAGCAGGGAAGGCGGGAGACAGCGCAGTTTGAATC	>H2AFZ(-)_GGAAGGCGGGAGACAGCGCAGTTTGAATC
chr8	96261600	96261601	MTERF3	90	-	344	179	523	11	198	24	6	30	9	7	14	>MTERF3(-)_CCACGTGGGCCCGGGAGCGC	>MTERF3(-)_CCACGTGGGCCCGGGAGCGCGGCTGCGCTGTGTAGGGCGGGCTGAGGA	>MTERF3(-)_CGGCTGCGCTGTGTAGGGCGGGCTGAGGA
chr2	96816269	96816270	CNNM3	54	+	439	69	508	8	245	28	2	30	3	8	5	>CNNM3(+)_GCGAGCGGGGTAGGCTGCGC	>CNNM3(+)_GCGAGCGGGGTAGGCTGCGCGAGAGGCCGAGAGGGGGCAGCAGGCGAT	>CNNM3(+)_CGAGAGGCCGAGAGGGGGCAGCAGGCGAT
chr11	17077665	17077666	RPS13	65	-	229	278	507	255	132	18	12	30	60	20	17	>RPS13(-)_GTTGGGTGGCTTCCTGCGGC	>RPS13(-)_GTTGGGTGGCTTCCTGCGGCGTTTCCACTCTCGCTCTCCTTTCGTTGC	>RPS13(-)_CGTTTCCACTCTCGCTCTCCTTTCGTTGC
chr5	132866641	132866642	UQCRQ	64	+	351	151	502	18	246	26	4	30	8	2	1	>UQCRQ(+)_GACCTCCAAGAGCGGCTTCC	>UQCRQ(+)_GACCTCCAAGAGCGGCTTCCAACCTTGCCGGAAATGACGAACGAGTCA	>UQCRQ(+)_CAACCTTGCCGGAAATGACGAACGAGTCA
chr19	18281621	18281622	JUND	2318	-	13	477	490	1712	30	2	28	30	145	0	0	>JUND(-)_AGCCGAGGCTATAAGAGGGC	>JUND(-)_AGCCGAGGCTATAAGAGGGCGCACAAGTGGCGCGGCGCAGGAGCCGCC	>JUND(-)_CGCACAAGTGGCGCGGCGCAGGAGCCGCC
chr2	62196125	62196126	B3GNT2	99	+	281	204	485	41	164	24	6	30	12	16	6	>B3GNT2(+)_CGCGGCGGCTGCTGCGCCTG	>B3GNT2(+)_CGCGGCGGCTGCTGCGCCTGGAACCGGAGCCTGGAGTGAGGCGCAGCG	>B3GNT2(+)_GGAACCGGAGCCTGGAGTGAGGCGCAGCG
chr6	75284774	75284775	TMEM30A	27	-	371	113	484	44	214	24	6	30	7	17	14	>TMEM30A(-)_TTTGGCGGAAGAGTGTCCCG	>TMEM30A(-)_TTTGGCGGAAGAGTGTCCCGCCTCTTCCGCTCTACAGCGGAGGTGGCT	>TMEM30A(-)_GCCTCTTCCGCTCTACAGCGGAGGTGGCT
chr14	49768152	49768153	KLHDC2	615	+	396	83	479	83	146	24	6	30	13	7	4	>KLHDC2(+)_GCGGCGTAAACAAGGCCGTG	>KLHDC2(+)_GCGGCGTAAACAAGGCCGTGGACTGCAGGAGGCGGGGCAGACGGGCTG	>KLHDC2(+)_GGACTGCAGGAGGCGGGGCAGACGGGCTG
chr15	39934134	39934135	EIF2AK4	66	+	425	54	479	16	186	27	3	30	3	4	0	>EIF2AK4(+)_CGCCCATAGCCCGTCCCCAG	>EIF2AK4(+)_CGCCCATAGCCCGTCCCCAGCGCGGAGCCCCGCCCCGCAGGCTGCCGG	>EIF2AK4(+)_GCGCGGAGCCCCGCCCCGCAGGCTGCCGG
chr1	204411816	204411817	PPP1R15B	588	-	322	148	470	69	195	27	3	30	18	50	18	>PPP1R15B(-)_CTAGGGGGGTGTCCTGCCGG	>PPP1R15B(-)_CTAGGGGGGTGTCCTGCCGGCGCGCGGGCCCTGCGGCCATTTTGGGCT	>PPP1R15B(-)_GCGCGCGGGCCCTGCGGCCATTTTGGGCT
chr7	33109402	33109403	RP9	34	-	356	113	469	2	191	26	4	30	11	1	0	>RP9(-)_CCGCCGCCGCCGCCGCCGCC	>RP9(-)_CCGCCGCCGCCGCCGCCGCCGCCGGAGCCGCGCCGCGGGGGTTGCCCG	>RP9(-)_CGCCGGAGCCGCGCCGCGGGGGTTGCCCG
chr9	128947698	128947699	NUP188	99	+	317	149	466	6	165	20	10	30	2	7	8	>NUP188(+)_CGAGCGGTCACGTGGGCATG	>NUP188(+)_CGAGCGGTCACGTGGGCATGGCGTCTGGGGGCGGGGTTAGGGCGAGCG	>NUP188(+)_GGCGTCTGGGGGCGGGGTTAGGGCGAGCG
chr6	26250634	26250635	HIST1H3F	607	-	136	327	463	450	101	11	19	30	36	20	8	>HIST1H3F(-)_TTGCCTTTATAAATAGGAGT	>HIST1H3F(-)_TTGCCTTTATAAATAGGAGTAAGAACAACTGTTTGTTCAGTTGTGACC	>HIST1H3F(-)_TAAGAACAACTGTTTGTTCAGTTGTGACC
chr16	89490560	89490561	ANKRD11	793	-	320	141	461	28	115	23	7	30	24	11	9	>ANKRD11(-)_GCCGGCTCCCGCCGCAGCCG	>ANKRD11(-)_GCCGGCTCCCGCCGCAGCCGCCGCTGGGTCCTGGAGCCAGAGGCCGCC	>ANKRD11(-)_GCCGCTGGGTCCTGGAGCCAGAGGCCGCC
chr9	127612276	127612277	STXBP1	625	+	315	144	459	8	174	25	5	30	6	24	8	>STXBP1(+)_CTGGCTCGCGCCGCGCCCCC	>STXBP1(+)_CTGGCTCGCGCCGCGCCCCCGCGCCCAGTCCGCGCGTCAGTCGGTCCC	>STXBP1(+)_CGCGCCCAGTCCGCGCGTCAGTCGGTCCC
chr3	32391878	32391879	CMTM7	402	+	295	158	453	69	160	25	5	30	12	4	8	>CMTM7(+)_CCCGCCCTCTGTATCTGGCC	>CMTM7(+)_CCCGCCCTCTGTATCTGGCCCCTGGGCAGCTGCCCGGGGAGGCGGCCA	>CMTM7(+)_CCCTGGGCAGCTGCCCGGGGAGGCGGCCA
chr11	62621983	62621984	B3GAT3	149	-	333	119	452	60	109	26	4	30	8	7	5	>B3GAT3(-)_GGAGCCGGGGTTTGGGGCGG	>B3GAT3(-)_GGAGCCGGGGTTTGGGGCGGGAACCCCTCGTCCCCTGCAGACCCCGCC	>B3GAT3(-)_GGAACCCCTCGTCCCCTGCAGACCCCGCC
chr2	44168901	44168902	PPM1B	118	+	289	162	451	27	171	27	3	30	1	17	5	>PPM1B(+)_GGGAGGGGGTTGCAAAAGGA	>PPM1B(+)_GGGAGGGGGTTGCAAAAGGAGCCGAGCGGCTTCTGCTCAATGGCGGAA	>PPM1B(+)_AGCCGAGCGGCTTCTGCTCAATGGCGGAA
chr1	108692326	108692327	PRPF38B	184	+	279	172	451	4	247	28	2	30	0	18	12	>PRPF38B(+)_GTCATATCCGCCGGGCCCGC	>PRPF38B(+)_GTCATATCCGCCGGGCCCGCCATCTTGTTCCCAGGGGCAGTTGGCGGA	>PRPF38B(+)_CCATCTTGTTCCCAGGGGCAGTTGGCGGA
chr15	50908706	50908707	AP4E1	51	+	397	51	448	6	211	28	2	30	1	14	22	>AP4E1(+)_TTCAAAAAACAGGAAGTGCC	>AP4E1(+)_TTCAAAAAACAGGAAGTGCCTACGGAGGCCGGGCCGGCAGCGGCGGCC	>AP4E1(+)_CTACGGAGGCCGGGCCGGCAGCGGCGGCC
chr12	14774404	14774405	H2AFJ	353	+	229	216	445	142	151	27	3	30	15	30	10	>H2AFJ(+)_GTAAAGAGTTTGTAGAGGCA	>H2AFJ(+)_GTAAAGAGTTTGTAGAGGCAGTTCGGGTGCGGTACGTTGCATTCCGGT	>H2AFJ(+)_AGTTCGGGTGCGGTACGTTGCATTCCGGT
chr20	45416143	45416144	PIGT	249	+	348	97	445	49	200	28	2	30	9	11	6	>PIGT(+)_CGGCTTTTCATGGGGCCGAG	>PIGT(+)_CGGCTTTTCATGGGGCCGAGCGCCGCTGGGTAGGCGGAAGTAGCCGCA	>PIGT(+)_GCGCCGCTGGGTAGGCGGAAGTAGCCGCA
chr7	44848079	44848080	H2AFV	529	-	397	47	444	15	180	20	10	30	9	9	1	>H2AFV(-)_CGGGCATTGGCCACAGCAGC	>H2AFV(-)_CGGGCATTGGCCACAGCAGCGCGAGGCGGGCACGGGGTATTGTCCGGC	>H2AFV(-)_CGCGAGGCGGGCACGGGGTATTGTCCGGC
chr16	69754920	69754921	NOB1	29	-	289	150	439	36	256	26	4	30	9	8	3	>NOB1(-)_GCCGGCGCAAGCTCCGTGCG	>NOB1(-)_GCCGGCGCAAGCTCCGTGCGCATGCGCGCTCCCCTCTCACGCAGCCAA	>NOB1(-)_GCATGCGCGCTCCCCTCTCACGCAGCCAA
chr9	70258977	70258978	SMC5	271	+	288	149	437	3	134	22	8	30	2	5	0	>SMC5(+)_GAGATCGCGGGAGCGAGCGC	>SMC5(+)_GAGATCGCGGGAGCGAGCGCGCGGTAACAGTTCGCGGCAGTTCGCGCG	>SMC5(+)_CGCGGTAACAGTTCGCGGCAGTTCGCGCG
chr5	177592202	177592203	TMED9	264	+	252	181	433	51	162	23	7	30	20	10	10	>TMED9(+)_CAGGGCGACGTGGCGCGGCC	>TMED9(+)_CAGGGCGACGTGGCGCGGCCGGCTGCGGCTGCGCAGGCAGGTGGAGCA	>TMED9(+)_CGGCTGCGGCTGCGCAGGCAGGTGGAGCA
chr2	222298995	222298996	PAX3	87	-	224	205	429	180	105	19	11	30	16	21	7	>PAX3(-)_AAAAGAACTAATAAATGCTC	>PAX3(-)_AAAAGAACTAATAAATGCTCCCGAGCCCGGATCCCCGCACTCGGTGTC	>PAX3(-)_CCCGAGCCCGGATCCCCGCACTCGGTGTC
chr6	57222281	57222282	RAB23	943	-	279	149	428	5	195	26	4	30	3	3	5	>RAB23(-)_CGAAGCACGGCGCATGCTCC	>RAB23(-)_CGAAGCACGGCGCATGCTCCGCAGCGCGGCGGGTCCACAGATGAGGGG	>RAB23(-)_CGCAGCGCGGCGGGTCCACAGATGAGGGG
chr13	75636328	75636329	LMO7	302	+	279	141	420	38	149	25	5	30	8	19	13	>LMO7(+)_GCGGGGAGGACGGCGGCGGC	>LMO7(+)_GCGGGGAGGACGGCGGCGGCGCTGCGACTTTTGAAGTCCAAACTGTCG	>LMO7(+)_CGCTGCGACTTTTGAAGTCCAAACTGTCG
chr19	11814291	11814292	ZNF440	361	+	259	159	418	50	145	26	4	30	11	14	4	>ZNF440(+)_GAAGGGGGAAGGGACAGTCG	>ZNF440(+)_GAAGGGGGAAGGGACAGTCGCCCTCCGTCCATTCCTTTAGTGCTGCGC	>ZNF440(+)_GCCCTCCGTCCATTCCTTTAGTGCTGCGC
chr6	33271675	33271676	VPS52	130	-	338	80	418	4	175	26	4	30	3	1	6	>VPS52(-)_CGCCGGGACTGACAGTTGCC	>VPS52(-)_CGCCGGGACTGACAGTTGCCGGAAGTGAGGCTGCGGGGAATGGCCGCC	>VPS52(-)_CGGAAGTGAGGCTGCGGGGAATGGCCGCC
chr16	70523815	70523816	SF3B3	166	+	272	145	417	19	208	23	7	30	14	18	13	>SF3B3(+)_CGGATTGGGTGCCTTTTTCC	>SF3B3(+)_CGGATTGGGTGCCTTTTTCCGCCGCGCGCCACCAGAATGTCCCTGTCT	>SF3B3(+)_CGCCGCGCGCCACCAGAATGTCCCTGTCT
chr3	87227311	87227312	CHMP2B	193	+	289	125	414	5	174	27	3	30	1	5	2	>CHMP2B(+)_AGGCGCCGCCTAGAAGTGAC	>CHMP2B(+)_AGGCGCCGCCTAGAAGTGACTTCTCCAAAAAGTGTGTTAGTTCCCGGT	>CHMP2B(+)_CTTCTCCAAAAAGTGTGTTAGTTCCCGGT
chr9	66900776	66900777	ZNF658	78	+	350	62	412	7	210	29	1	30	0	3	1	>ZNF658(+)_ACCCAGCCCCACCTCCTGCC	>ZNF658(+)_ACCCAGCCCCACCTCCTGCCGTCTGCCCTCCCGGGCCTGAAAGGGACA	>ZNF658(+)_CGTCTGCCCTCCCGGGCCTGAAAGGGACA
chr16	1959575	1959576	NDUFB10	239	+	233	178	411	99	143	24	6	30	13	13	10	>NDUFB10(+)_GTAGCGGGCGACCTAGGCCG	>NDUFB10(+)_GTAGCGGGCGACCTAGGCCGCGGGACCCGGACGGAGGTAGAGGCCAGG	>NDUFB10(+)_GCGGGACCCGGACGGAGGTAGAGGCCAGG
chr22	46268019	46268020	TTC38	112	+	269	140	409	56	252	25	5	30	8	22	4	>TTC38(+)_CCACTCCCAGGAAGGCCCGG	>TTC38(+)_CCACTCCCAGGAAGGCCCGGGTGCCCAGAGCTCGCGGTGGACTCCGAC	>TTC38(+)_GGTGCCCAGAGCTCGCGGTGGACTCCGAC
chr1	23825406	23825407	HMGCL	228	-	277	129	406	21	213	27	3	30	19	14	22	>HMGCL(-)_CTGGACTGCCGCGGGGGATT	>HMGCL(-)_CTGGACTGCCGCGGGGGATTCTGGGCCAAGATGGCAGCAATGAGGAAG	>HMGCL(-)_TCTGGGCCAAGATGGCAGCAATGAGGAAG
chr1	160262450	160262451	DCAF8	251	-	306	99	405	40	148	23	7	30	16	21	24	>DCAF8(-)_GCAGAGAGCGGAGGCGGTGG	>DCAF8(-)_GCAGAGAGCGGAGGCGGTGGTGGTGGCGGCCGCTGGCCAGTGTAAGAT	>DCAF8(-)_GTGGTGGCGGCCGCTGGCCAGTGTAAGAT
chr15	75640201	75640202	IMP3	141	-	256	145	401	16	198	25	5	30	8	5	4	>IMP3(-)_CCGCGGCGGAAATCGCGCGG	>IMP3(-)_CCGCGGCGGAAATCGCGCGGATGCCAGAACGCGCTCTCAGCTTCGGGT	>IMP3(-)_GATGCCAGAACGCGCTCTCAGCTTCGGGT
chr3	129183891	129183892	CNBP	115	-	283	117	400	32	216	28	2	30	12	3	6	>CNBP(-)_GGAGAGCCGTGCGCAGCGGC	>CNBP(-)_GGAGAGCCGTGCGCAGCGGCGTATGTGGGGCCGTGTGCAGACCCGCGT	>CNBP(-)_CGTATGTGGGGCCGTGTGCAGACCCGCGT
chr6	143511688	143511689	FUCA2	169	-	348	49	397	6	116	28	2	30	3	5	2	>FUCA2(-)_CCGCGGCGCGGCATACTCAG	>FUCA2(-)_CCGCGGCGCGGCATACTCAGCGGCAGAGACGGAAGAACAGCGCTCCCG	>FUCA2(-)_GCGGCAGAGACGGAAGAACAGCGCTCCCG
chr6	43635839	43635840	MAD2L1BP	90	+	285	110	395	5	181	25	5	30	2	11	2	>MAD2L1BP(+)_GGAGGCGCGGGCTTCCCATG	>MAD2L1BP(+)_GGAGGCGCGGGCTTCCCATGATGCCCCGCGAGACCTTTATTCTAACCG	>MAD2L1BP(+)_GATGCCCCGCGAGACCTTTATTCTAACCG
chr2	8837612	8837613	KIDINS220	139	-	253	137	390	5	207	24	6	30	4	10	2	>KIDINS220(-)_CCCGGAGTCCCTCCCCTACC	>KIDINS220(-)_CCCGGAGTCCCTCCCCTACCCAGGGCACGTGATCTGTCAGTTCGCGGA	>KIDINS220(-)_CCAGGGCACGTGATCTGTCAGTTCGCGGA
chr1	6199593	6199594	RPL22	49	-	224	162	386	86	215	21	9	30	24	9	8	>RPL22(-)_CTGCGGGCTCTTTGCGTCTG	>RPL22(-)_CTGCGGGCTCTTTGCGTCTGCGTAGTTCGCTCACCTCCCTTTCTAACT	>RPL22(-)_GCGTAGTTCGCTCACCTCCCTTTCTAACT
chr2	74465365	74465366	MOGS	65	-	356	28	384	11	243	28	2	30	3	17	17	>MOGS(-)_GGCGGGAGGCGGAGGCGGAG	>MOGS(-)_GGCGGGAGGCGGAGGCGGAGGCGCAGGCGCTGGCTGGCAGGTGTCGCT	>MOGS(-)_GGCGCAGGCGCTGGCTGGCAGGTGTCGCT
chr3	51995894	51995895	RPL29	150	-	207	175	382	91	142	23	7	30	21	47	21	>RPL29(-)_TGTTGACCCTATTTCCCGTG	>RPL29(-)_TGTTGACCCTATTTCCCGTGCTGCACCGCAGCCCCTTTCTCTTCCGGT	>RPL29(-)_GCTGCACCGCAGCCCCTTTCTCTTCCGGT
chr12	120194712	120194713	GCN1	175	-	240	142	382	21	202	27	3	30	18	8	14	>GCN1(-)_CACGCTGTGACCCGGAAGCG	>GCN1(-)_CACGCTGTGACCCGGAAGCGTTCCGGAAGCGGTTCCGGAGTCAGCCCC	>GCN1(-)_GTTCCGGAAGCGGTTCCGGAGTCAGCCCC
chr7	5781645	5781646	RNF216	154	-	301	76	377	11	206	28	2	30	4	8	6	>RNF216(-)_GCGCAGGCGCGAGGTGACGC	>RNF216(-)_GCGCAGGCGCGAGGTGACGCCGCGGCAGGGCCGGAAGGAGTGCAGCGG	>RNF216(-)_CCGCGGCAGGGCCGGAAGGAGTGCAGCGG
chr6	18264523	18264524	DEK	69	-	296	80	376	22	212	28	2	30	9	17	12	>DEK(-)_CGCTCTCCTTCCCGAACCGC	>DEK(-)_CGCTCTCCTTCCCGAACCGCCATTTTGAAAATCTTGTTGATTCTGGGG	>DEK(-)_CCATTTTGAAAATCTTGTTGATTCTGGGG
chr1	2526595	2526596	PANK4	67	-	250	125	375	104	194	24	6	30	20	23	21	>PANK4(-)_ATGCGCATATATCTCCATGG	>PANK4(-)_ATGCGCATATATCTCCATGGCTGATGAGCTGGCCGGGCACTTTCAAAA	>PANK4(-)_GCTGATGAGCTGGCCGGGCACTTTCAAAA
chr17	50719597	50719598	LUC7L3	119	+	232	141	373	67	188	24	6	30	37	11	3	>LUC7L3(+)_GGCGCACGGCATGCTGGGAA	>LUC7L3(+)_GGCGCACGGCATGCTGGGAAGGCGTCCGCGCGGCGGCCATTTTGTCTT	>LUC7L3(+)_AGGCGTCCGCGCGGCGGCCATTTTGTCTT
chr6	10694621	10694622	C6orf52	103	-	237	133	370	18	214	24	6	30	8	6	5	>C6orf52(-)_CTGCGAAGCCCTTCATTTCC	>C6orf52(-)_CTGCGAAGCCCTTCATTTCCGTGACATCAGGAGGAGGTGGGGCCGACT	>C6orf52(-)_CGTGACATCAGGAGGAGGTGGGGCCGACT
chr11	45805159	45805160	SLC35C1	234	+	287	83	370	5	160	27	3	30	2	7	9	>SLC35C1(+)_CCAGGGCCCGCCTCCCGGGG	>SLC35C1(+)_CCAGGGCCCGCCTCCCGGGGAGTCGGCCTCGGATGTCCGGAGGCTCCT	>SLC35C1(+)_GAGTCGGCCTCGGATGTCCGGAGGCTCCT
chr9	35815000	35815001	HINT2	81	-	300	64	364	10	155	29	1	30	12	9	11	>HINT2(-)_CACGGCCGGCCGCGGAGCCG	>HINT2(-)_CACGGCCGGCCGCGGAGCCGAGTGCTGACCCGGGTGAGAGGTTCCCGC	>HINT2(-)_GAGTGCTGACCCGGGTGAGAGGTTCCCGC
chr19	45692693	45692694	QPCTL	151	+	282	80	362	27	269	27	3	30	6	17	3	>QPCTL(+)_GCCTAAACTCAATCCGTGGT	>QPCTL(+)_GCCTAAACTCAATCCGTGGTCTGGTACAGGTTTCAGGGCAAAGCGGCC	>QPCTL(+)_TCTGGTACAGGTTTCAGGGCAAAGCGGCC
chr20	23362181	23362182	GZF1	39	+	300	59	359	19	167	23	7	30	8	9	5	>GZF1(+)_CCGCGCAGGGTGCTACGCCA	>GZF1(+)_CCGCGCAGGGTGCTACGCCACGCCCAGCCGGGCCGGCCGTTCCTACCG	>GZF1(+)_ACGCCCAGCCGGGCCGGCCGTTCCTACCG
chr22	38681974	38681975	TOMM22	198	+	232	120	352	23	274	25	5	30	12	16	21	>TOMM22(+)_GCTGCGCTCACCTCCTTTCC	>TOMM22(+)_GCTGCGCTCACCTCCTTTCCGCTTCCGGTGTCCCCTACAGTCATGGCT	>TOMM22(+)_CGCTTCCGGTGTCCCCTACAGTCATGGCT
chr9	17135052	17135053	CNTLN	95	+	278	74	352	19	159	30	0	30	4	7	5	>CNTLN(+)_AAGGGAGGTGGAGTTTCCAA	>CNTLN(+)_AAGGGAGGTGGAGTTTCCAACAGGGAACTTGACCCGTTAGCAGCCGCA	>CNTLN(+)_ACAGGGAACTTGACCCGTTAGCAGCCGCA
chr10	23095578	23095579	MSRB2	253	+	264	83	347	61	124	28	2	30	8	16	9	>MSRB2(+)_GGGTGGGATGGGAGCAGGGG	>MSRB2(+)_GGGTGGGATGGGAGCAGGGGCAGAGACGGGCAGAGGGCAGAGGGCGGA	>MSRB2(+)_GCAGAGACGGGCAGAGGGCAGAGGGCGGA
chr3	123067099	123067100	PDIA5	118	+	293	51	344	15	162	26	4	30	2	8	9	>PDIA5(+)_GGGAAGTGGCCGTGGTGGTT	>PDIA5(+)_GGGAAGTGGCCGTGGTGGTTGGCCGCGGTGGAGCTAGCAGGCGGGCGG	>PDIA5(+)_TGGCCGCGGTGGAGCTAGCAGGCGGGCGG
chr4	82373983	82373984	HNRNPD	81	-	249	94	343	10	215	27	3	30	0	4	5	>HNRNPD(-)_GCGTCACGTGACCGGGACGC	>HNRNPD(-)_GCGTCACGTGACCGGGACGCGCCGTTCTTCCGTCGGCCATTTTAGGTG	>HNRNPD(-)_CGCCGTTCTTCCGTCGGCCATTTTAGGTG
chr16	15888589	15888590	FOPNL	84	-	238	104	342	11	197	27	3	30	9	5	6	>FOPNL(-)_CGCGTGCGCAGGGCCGCGGT	>FOPNL(-)_CGCGTGCGCAGGGCCGCGGTGCGGCCCTGGCGGCCGTTGAAAAATGGC	>FOPNL(-)_TGCGGCCCTGGCGGCCGTTGAAAAATGGC
chr1	10399068	10399069	PGD	93	+	112	227	339	41	172	19	11	30	8	4	3	>PGD(+)_CGCAGTTTCTGGAGGGAGCC	>PGD(+)_CGCAGTTTCTGGAGGGAGCCGCTGCGGGTCTTTCCCTCACTCGTCCTC	>PGD(+)_CGCTGCGGGTCTTTCCCTCACTCGTCCTC
chr12	98515616	98515617	TMPO	35	+	240	97	337	11	183	26	4	30	5	7	13	>TMPO(+)_GGGGCGTGGGCGAAGCAGGC	>TMPO(+)_GGGGCGTGGGCGAAGCAGGCTGCTCGCCTCCTGCCTGTAGTGTGTGGG	>TMPO(+)_CTGCTCGCCTCCTGCCTGTAGTGTGTGGG
chr11	22829800	22829801	SVIP	178	-	288	48	336	32	192	28	2	30	12	6	2	>SVIP(-)_GCGCGGAGGACCAGGGACCG	>SVIP(-)_GCGCGGAGGACCAGGGACCGGCTCCGGACCGCGCAGTTAGCGCCGCCT	>SVIP(-)_GGCTCCGGACCGCGCAGTTAGCGCCGCCT
chr3	183884879	183884880	PARL	37	-	256	74	330	5	218	25	5	30	6	15	8	>PARL(-)_GCCTTCGCCCCGGAAGTAGT	>PARL(-)_GCCTTCGCCCCGGAAGTAGTTGCGCAGCTGGGGTTGGTAAGGTCGGGC	>PARL(-)_TTGCGCAGCTGGGGTTGGTAAGGTCGGGC
chr15	75023608	75023609	PPCDC	104	+	271	54	325	16	152	26	4	30	10	0	1	>PPCDC(+)_AGAGCGGCAGAGATACCGCG	>PPCDC(+)_AGAGCGGCAGAGATACCGCGATATTTGGGAGCGGCCCCGAGACGCGCC	>PPCDC(+)_GATATTTGGGAGCGGCCCCGAGACGCGCC
chr11	62727456	62727457	HNRNPUL2	108	-	279	45	324	19	130	26	4	30	4	8	2	>HNRNPUL2(-)_GGGGGCGCCAGAGGGCGGGA	>HNRNPUL2(-)_GGGGGCGCCAGAGGGCGGGAGGAAGCGGGAGGAACTCCGTCGTCCTCC	>HNRNPUL2(-)_AGGAAGCGGGAGGAACTCCGTCGTCCTCC
chr11	62727456	62727457	HNRNPUL2-BSCL2	108	-	279	45	324	19	130	26	4	30	4	8	2	>HNRNPUL2-BSCL2(-)_GGGGGCGCCAGAGGGCGGGA	>HNRNPUL2-BSCL2(-)_GGGGGCGCCAGAGGGCGGGAGGAAGCGGGAGGAACTCCGTCGTCCTCC	>HNRNPUL2-BSCL2(-)_AGGAAGCGGGAGGAACTCCGTCGTCCTCC
chr15	101295203	101295204	SNRPA1	29	-	226	98	324	17	157	28	2	30	5	2	8	>SNRPA1(-)_TGGGACGTCTCGCTGGCGGG	>SNRPA1(-)_TGGGACGTCTCGCTGGCGGGAGGCCACGGGCTTTCCACAGCGCGGGGG	>SNRPA1(-)_GAGGCCACGGGCTTTCCACAGCGCGGGGG
chr5	69369478	69369479	AK6	33	-	220	101	321	13	221	28	2	30	7	13	15	>AK6(-)_GCGCCCGAAGCCGTCGCGGC	>AK6(-)_GCGCCCGAAGCCGTCGCGGCGGGGACCATGTTGCTTCCGAACATCCTG	>AK6(-)_CGGGGACCATGTTGCTTCCGAACATCCTG
chr5	69369478	69369479	TAF9	33	-	220	101	321	13	221	28	2	30	7	13	15	>TAF9(-)_GCGCCCGAAGCCGTCGCGGC	>TAF9(-)_GCGCCCGAAGCCGTCGCGGCGGGGACCATGTTGCTTCCGAACATCCTG	>TAF9(-)_CGGGGACCATGTTGCTTCCGAACATCCTG
chr7	6009271	6009272	AIMP2	70	+	248	71	319	28	173	27	3	30	10	3	12	>AIMP2(+)_CACCGGACTGCGTTTTCCCG	>AIMP2(+)_CACCGGACTGCGTTTTCCCGAACGCCCGCAGCAGGGTCAGAAGGGAGG	>AIMP2(+)_GAACGCCCGCAGCAGGGTCAGAAGGGAGG
chr13	113209612	113209613	CUL4A	87	+	191	128	319	12	123	22	8	30	5	3	0	>CUL4A(+)_GAGCTCGGCGGGCGGCGGCG	>CUL4A(+)_GAGCTCGGCGGGCGGCGGCGCTCGGGGCGGGGCGCGGCGGTTCCGGCC	>CUL4A(+)_GCTCGGGGCGGGGCGCGGCGGTTCCGGCC
chr6	70566929	70566930	SDHAF4	74	+	264	54	318	8	155	28	2	30	8	0	5	>SDHAF4(+)_CCTCCCACTACTGCTTTGCG	>SDHAF4(+)_CCTCCCACTACTGCTTTGCGCCTGCGCGGAGGCTCGGGGAGTCGGCGC	>SDHAF4(+)_GCCTGCGCGGAGGCTCGGGGAGTCGGCGC
chr19	50804593	50804594	C19orf48	116	-	203	114	317	465	126	27	3	30	42	130	38	>C19orf48(-)_CGCGCACTATAAAATGGCGC	>C19orf48(-)_CGCGCACTATAAAATGGCGCGTGCTGCAACCCGCGCCCGCTTCGGAGA	>C19orf48(-)_CGTGCTGCAACCCGCGCCCGCTTCGGAGA
chr16	1773157	1773158	MRPS34	43	-	274	41	315	2	180	27	3	30	4	1	1	>MRPS34(-)_GCGACCGAACACTTTAGCCT	>MRPS34(-)_GCGACCGAACACTTTAGCCTGGGACACCGGCCTCTTCCGGTGACTTCC	>MRPS34(-)_TGGGACACCGGCCTCTTCCGGTGACTTCC
chr6	26285533	26285534	HIST1H4H	2487	-	134	177	311	81	68	18	12	30	15	16	1	>HIST1H4H(-)_TTCCCGGCATATAAGGGCGT	>HIST1H4H(-)_TTCCCGGCATATAAGGGCGTTGCTTTGCCTTGGCGTTTAGGTTTCTTA	>HIST1H4H(-)_TTGCTTTGCCTTGGCGTTTAGGTTTCTTA
chr1	11934688	11934689	PLOD1	231	+	291	20	311	2	219	29	1	30	0	0	1	>PLOD1(+)_GTGGAGGGGCGGGGTGGTGC	>PLOD1(+)_GTGGAGGGGCGGGGTGGTGCCGCCCCCGGGGCGGGCCCAGTGCGTGGC	>PLOD1(+)_CCGCCCCCGGGGCGGGCCCAGTGCGTGGC
chr9	68780064	68780065	FAM122A	202	+	196	113	309	9	218	26	4	30	3	3	5	>FAM122A(+)_GAAGGGCTACGCATGCGCAG	>FAM122A(+)_GAAGGGCTACGCATGCGCAGAGGGGCCAGCCCGCTGACAGATTCTCGG	>FAM122A(+)_GAGGGGCCAGCCCGCTGACAGATTCTCGG
chr9	68780064	68780065	PIP5K1B	202	+	196	113	309	9	218	26	4	30	3	3	5	>PIP5K1B(+)_GAAGGGCTACGCATGCGCAG	>PIP5K1B(+)_GAAGGGCTACGCATGCGCAGAGGGGCCAGCCCGCTGACAGATTCTCGG	>PIP5K1B(+)_GAGGGGCCAGCCCGCTGACAGATTCTCGG
chr12	111842235	111842236	MAPKAPK5	26	+	279	24	303	2	208	30	0	30	4	5	1	>MAPKAPK5(+)_GGGCGGCCGGCGGGGCTGCC	>MAPKAPK5(+)_GGGCGGCCGGCGGGGCTGCCCGGCGCGGGTGTCCCGGCGATGTGTGGC	>MAPKAPK5(+)_CCGGCGCGGGTGTCCCGGCGATGTGTGGC
chr17	41811943	41811944	P3H4	151	-	267	33	300	15	174	26	4	30	7	16	11	>P3H4(-)_CCGGCCCTGTCCCCTTCCGT	>P3H4(-)_CCGGCCCTGTCCCCTTCCGTCCGCGGGGCAGCCAGCTCAGCTCCGGAG	>P3H4(-)_TCCGCGGGGCAGCCAGCTCAGCTCCGGAG
chr16	75623240	75623241	ADAT1	80	-	215	84	299	39	115	27	3	30	4	14	6	>ADAT1(-)_CGGCGGATTAAGCTCGCTTT	>ADAT1(-)_CGGCGGATTAAGCTCGCTTTCTTCTAGGCGCGTTTCCTGAAGGTGGGA	>ADAT1(-)_TCTTCTAGGCGCGTTTCCTGAAGGTGGGA
chr6	57172305	57172306	BAG2	180	+	210	85	295	14	183	28	2	30	2	5	2	>BAG2(+)_AGCTGGGGGTGGTCTGTGGG	>BAG2(+)_AGCTGGGGGTGGTCTGTGGGTCCGCGCGGGCTTCGGGTAGTTCCTGGG	>BAG2(+)_GTCCGCGCGGGCTTCGGGTAGTTCCTGGG
chr6	43053798	43053799	CUL7	177	-	196	94	290	4	130	23	7	30	8	6	6	>CUL7(-)_GCGGAGCCGCTGGCAGGGAC	>CUL7(-)_GCGGAGCCGCTGGCAGGGACCGGGCCCCACCCTGCCCCAGTGGCTGCC	>CUL7(-)_CCGGGCCCCACCCTGCCCCAGTGGCTGCC
chr1	32205670	32205671	IQCC	240	+	185	100	285	10	124	26	4	30	4	3	4	>IQCC(+)_CCAATGACGTACTTCGCAGG	>IQCC(+)_CCAATGACGTACTTCGCAGGCGCGCGGGCGGGCCTGGCAGTTGGCGCC	>IQCC(+)_GCGCGCGGGCGGGCCTGGCAGTTGGCGCC
chr5	177303714	177303715	RAB24	138	-	223	59	282	1	164	27	3	30	1	1	5	>RAB24(-)_GCGCCACGTGACCTTGCGGC	>RAB24(-)_GCGCCACGTGACCTTGCGGCCCCGCCCCCTCGCCCTCTAGCCCCCTCC	>RAB24(-)_CCCCGCCCCCTCGCCCTCTAGCCCCCTCC
chr10	99620429	99620430	SLC25A28	51	-	213	63	276	5	83	30	0	30	4	19	19	>SLC25A28(-)_CGCGGGGCCAAGCGGGAGCC	>SLC25A28(-)_CGCGGGGCCAAGCGGGAGCCGGAGGCCCCGGGCTCTCTGGGCCGCGCC	>SLC25A28(-)_CGGAGGCCCCGGGCTCTCTGGGCCGCGCC
chr17	4263955	4263956	ANKFY1	198	-	166	109	275	41	161	25	5	30	16	0	7	>ANKFY1(-)_CCCCGGTTGAGCCGCGCACT	>ANKFY1(-)_CCCCGGTTGAGCCGCGCACTTCTCGCGAGGTTGCAGGCAGTGCCGGGC	>ANKFY1(-)_TTCTCGCGAGGTTGCAGGCAGTGCCGGGC
chr12	47963604	47963605	TMEM106C	29	+	246	29	275	17	237	26	4	30	5	1	3	>TMEM106C(+)_TCCTGGCGGGCTTGGTATTT	>TMEM106C(+)_TCCTGGCGGGCTTGGTATTTGGCGCCTGCGCGCTGAGTGCGTGCCGCT	>TMEM106C(+)_TGGCGCCTGCGCGCTGAGTGCGTGCCGCT
chr15	78540443	78540444	PSMA4	57	+	174	99	273	16	212	25	5	30	17	6	5	>PSMA4(+)_CCGCCCCAACCCAGCGGTTC	>PSMA4(+)_CCGCCCCAACCCAGCGGTTCTGCGCATGCGCGGGGGCCATATTAGCAG	>PSMA4(+)_CTGCGCATGCGCGGGGGCCATATTAGCAG
chr7	4775636	4775637	AP5Z1	112	+	193	78	271	13	163	26	4	30	2	4	5	>AP5Z1(+)_CACGTAAGGCCGCTGCGCTC	>AP5Z1(+)_CACGTAAGGCCGCTGCGCTCACGTGACGCGGTCCCGGAAGTTGACCGG	>AP5Z1(+)_CACGTGACGCGGTCCCGGAAGTTGACCGG
chr19	3506303	3506304	FZR1	25	+	212	59	271	1	127	28	2	30	5	2	3	>FZR1(+)_CGCGGCCGGCCGGGCGCGCG	>FZR1(+)_CGCGGCCGGCCGGGCGCGCGCGGCGGAGGGAGGGAGCCGGGAGGCAGC	>FZR1(+)_GCGGCGGAGGGAGGGAGCCGGGAGGCAGC
chr7	99616965	99616966	ZSCAN25	88	+	195	68	263	40	205	26	4	30	14	8	2	>ZSCAN25(+)_ACCTGTCTAACAGCGTCCGC	>ZSCAN25(+)_ACCTGTCTAACAGCGTCCGCAGCTCACTTCCGGACCGCGGATAGCACT	>ZSCAN25(+)_CAGCTCACTTCCGGACCGCGGATAGCACT
chr20	5113075	5113076	TMEM230	46	-	232	22	254	1	180	27	3	30	2	0	2	>TMEM230(-)_TTCCGACGCGCCTGTTTCCG	>TMEM230(-)_TTCCGACGCGCCTGTTTCCGGCACGCCACTTCCGGCGCACTGATCCCG	>TMEM230(-)_GGCACGCCACTTCCGGCGCACTGATCCCG
chr6	30914346	30914347	VARS2	77	+	204	47	251	6	128	29	1	30	4	1	3	>VARS2(+)_CCGCGGGGCGCCCTGGGATA	>VARS2(+)_CCGCGGGGCGCCCTGGGATAGCGGCGGGGCCTCCTGGTGAGCGCGCGC	>VARS2(+)_AGCGGCGGGGCCTCCTGGTGAGCGCGCGC
chr22	38656659	38656660	CBY1	77	+	177	46	223	1	230	25	5	30	3	4	6	>CBY1(+)_CCGGGCGGGGCAGCGCATGC	>CBY1(+)_CCGGGCGGGGCAGCGCATGCGCGTGGCGGGCAGGCGGCAGGAGGCGGG	>CBY1(+)_CGCGTGGCGGGCAGGCGGCAGGAGGCGGG
chr16	4693717	4693718	NUDT16L1	305	+	98	91	189	53	148	26	4	30	7	6	7	>NUDT16L1(+)_CGCGCATGCTCTTAAGTGGC	>NUDT16L1(+)_CGCGCATGCTCTTAAGTGGCAGCGGCGGGGACGGGGTCAGTGCCAAGA	>NUDT16L1(+)_CAGCGGCGGGGACGGGGTCAGTGCCAAGA
chr20	62926504	62926505	DIDO1	121	-	124	61	185	2	155	26	4	30	2	0	4	>DIDO1(-)_CCGCCCGCCGCGCGGGGGCG	>DIDO1(-)_CCGCCCGCCGCGCGGGGGCGCCGCTCTAGCCCCGCGCCATCTCGGTGG	>DIDO1(-)_GCCGCTCTAGCCCCGCGCCATCTCGGTGG
chr13	112690037	112690038	ATP11A	287	+	97	74	171	30	65	24	6	30	6	5	4	>ATP11A(+)_CGGAGCAGGGGCAGGAGCCA	>ATP11A(+)_CGGAGCAGGGGCAGGAGCCAGCGGGGCCCGGAGGCTCCAGAGGGCGGC	>ATP11A(+)_AGCGGGGCCCGGAGGCTCCAGAGGGCGGC
chr17	7579639	7579640	CD68	12	+	90	57	147	16	58	28	2	30	6	4	2	>CD68(+)_AAGAGAGGGCTGAGGGAGCA	>CD68(+)_AAGAGAGGGCTGAGGGAGCAGGGTTGAGCAACTGGTGCAGACAGCCTA	>CD68(+)_AGGGTTGAGCAACTGGTGCAGACAGCCTA
chr12	57745070	57745071	TSPAN31	66	+	67	27	94	9	99	30	0	30	0	0	2	>TSPAN31(+)_CAGAGTATTGGGTTTGGCTG	>TSPAN31(+)_CAGAGTATTGGGTTTGGCTGGCCTCGATTTAAAGAGACAGAAGCTGTC	>TSPAN31(+)_GGCCTCGATTTAAAGAGACAGAAGCTGTC
chr2	47176515	47176516	CALM2	271	-	174	790	964	286	105	14	15	29	33	23	7	>CALM2(-)_GAGGGAGGTGTTTATGAGGC	>CALM2(-)_GAGGGAGGTGTTTATGAGGCGCTGGGGGCGGAGGAGGCGAATTAGTCC	>CALM2(-)_CGCTGGGGGCGGAGGAGGCGAATTAGTCC
chr8	73008906	73008907	TERF1	133	+	640	244	884	37	98	26	3	29	7	18	4	>TERF1(+)_CCAAGCGAGCCATTTAACAT	>TERF1(+)_CCAAGCGAGCCATTTAACATGGCGGAGGATGTTTCCTCAGCGGCCCCG	>TERF1(+)_TGGCGGAGGATGTTTCCTCAGCGGCCCCG
chr2	190880820	190880821	GLS	5253	+	267	616	883	207	110	14	15	29	26	23	4	>GLS(+)_CGCTGAAGGTCTCTAGCCCT	>GLS(+)_CGCTGAAGGTCTCTAGCCCTCCCCTGCGCTTTAGCCTCAGTGCGGAGC	>GLS(+)_TCCCCTGCGCTTTAGCCTCAGTGCGGAGC
chr4	3532419	3532420	LRPAP1	400	-	581	278	859	158	180	23	6	29	36	35	13	>LRPAP1(-)_ATCGGCAGGCTAGGTTTTCT	>LRPAP1(-)_ATCGGCAGGCTAGGTTTTCTCCGCGCAGCGCCAGTCGCAGAGGAAGAT	>LRPAP1(-)_TCCGCGCAGCGCCAGTCGCAGAGGAAGAT
chr6	36678713	36678714	CDKN1A	1822	+	242	585	827	811	124	17	12	29	109	66	21	>CDKN1A(+)_GCGGTTGTATATCAGGGCCG	>CDKN1A(+)_GCGGTTGTATATCAGGGCCGCGCTGAGCTGCGCCAGCTGAGGTGTGAG	>CDKN1A(+)_GCGCTGAGCTGCGCCAGCTGAGGTGTGAG
chr5	132490772	132490773	IRF1	725	-	299	515	814	455	191	20	9	29	65	60	12	>IRF1(-)_TAAGTGTTTGGATTGCTCGG	>IRF1(-)_TAAGTGTTTGGATTGCTCGGTGGCGCCGCTGCCCTGGCAGAGCTCGCC	>IRF1(-)_GTGGCGCCGCTGCCCTGGCAGAGCTCGCC
chr17	29294114	29294115	NUFIP2	2097	-	201	599	800	188	85	14	15	29	19	18	5	>NUFIP2(-)_CGCTCAGATATACTGAGTGA	>NUFIP2(-)_CGCTCAGATATACTGAGTGAGCCCTGAGAAGCAGTCTCAGATCCTGAC	>NUFIP2(-)_AGCCCTGAGAAGCAGTCTCAGATCCTGAC
chr16	87869504	87869505	SLC7A5	104	-	417	352	769	194	99	22	7	29	19	15	0	>SLC7A5(-)_GCCGGGGCCTAAAAGGCGGC	>SLC7A5(-)_GCCGGGGCCTAAAAGGCGGCGCGGGCGGGGTTCCTGACGCAGCTGCGG	>SLC7A5(-)_CGCGGGCGGGGTTCCTGACGCAGCTGCGG
chr7	66205333	66205334	TPST1	1850	+	503	258	761	29	159	25	4	29	16	15	4	>TPST1(+)_CGGACCCTGGCGGTTGTCGC	>TPST1(+)_CGGACCCTGGCGGTTGTCGCTGAGTTGGCGACCGCGGGAGACGCTGCT	>TPST1(+)_CTGAGTTGGCGACCGCGGGAGACGCTGCT
chr10	110497906	110497907	DUSP5	561	+	87	646	733	199	27	9	20	29	23	74	3	>DUSP5(+)_TCATTCACATAAAACGCTGC	>DUSP5(+)_TCATTCACATAAAACGCTGCGCGGCCGGCGGAATCCCCGGCTTCTAGG	>DUSP5(+)_CGCGGCCGGCGGAATCCCCGGCTTCTAGG
chr17	83079608	83079609	METRNL	1643	+	11	705	716	117	9	0	29	29	36	5	0	>METRNL(+)_GCTGAGCCCGGCCGGGCGGA	>METRNL(+)_GCTGAGCCCGGCCGGGCGGACTCGGACTCGCCAACTTCAGAGGCTCGG	>METRNL(+)_ACTCGGACTCGCCAACTTCAGAGGCTCGG
chr17	3668577	3668578	TAX1BP3	775	-	372	336	708	340	96	23	6	29	52	74	20	>TAX1BP3(-)_GGCGGCCTTTGTTAAGCAGC	>TAX1BP3(-)_GGCGGCCTTTGTTAAGCAGCGAGGGCGCGACCGCGGGTACTCTGCTGC	>TAX1BP3(-)_CGAGGGCGCGACCGCGGGTACTCTGCTGC
chr9	125241342	125241343	HSPA5	700	-	255	449	704	515	159	15	14	29	60	72	14	>HSPA5(-)_GGGGAGGGTATATAAGCCGA	>HSPA5(-)_GGGGAGGGTATATAAGCCGAGTAGGCGACGGTGAGGTCGACGCCGGCC	>HSPA5(-)_AGTAGGCGACGGTGAGGTCGACGCCGGCC
chr10	103367975	103367976	TAF5	198	+	453	209	662	22	259	23	6	29	12	5	9	>TAF5(+)_ATGTGGCGAAAATGCAATCA	>TAF5(+)_ATGTGGCGAAAATGCAATCACGCTTGACGGCGCGAGGTGGCTCAGCCG	>TAF5(+)_ACGCTTGACGGCGCGAGGTGGCTCAGCCG
chr7	75879033	75879034	RHBDD2	280	+	430	197	627	80	210	24	5	29	25	13	8	>RHBDD2(+)_GTTGCCAAGGGAAACTGCCG	>RHBDD2(+)_GTTGCCAAGGGAAACTGCCGCGAGGAGGCGGAAGGAGCAGAGGACCGG	>RHBDD2(+)_GCGAGGAGGCGGAAGGAGCAGAGGACCGG
chr8	37695782	37695783	ZNF703	899	+	158	463	621	258	84	8	21	29	29	14	9	>ZNF703(+)_ATCGCGGCTATTTGACGTGC	>ZNF703(+)_ATCGCGGCTATTTGACGTGCGGCTCGAGGAAGGCGAAGGTTTTTGTGT	>ZNF703(+)_CGGCTCGAGGAAGGCGAAGGTTTTTGTGT
chr1	149852607	149852608	HIST2H3A	402	+	122	492	614	436	98	11	18	29	53	58	13	>HIST2H3A(+)_TGTGCTTATAAAGACGGCTG	>HIST2H3A(+)_TGTGCTTATAAAGACGGCTGCGGCGGGGCTAGGAGCTCGTTTTTCTCC	>HIST2H3A(+)_GCGGCGGGGCTAGGAGCTCGTTTTTCTCC
chr2	96208821	96208822	STARD7	167	-	415	181	596	127	141	22	7	29	26	30	13	>STARD7(-)_GGAGAAAAAGTAGGGTGCGC	>STARD7(-)_GGAGAAAAAGTAGGGTGCGCGCGCGCCGCGCGTGTGGCAGTCGCGGAA	>STARD7(-)_CGCGCGCCGCGCGTGTGGCAGTCGCGGAA
chr1	19210260	19210261	UBR4	229	-	395	193	588	28	180	23	6	29	6	65	45	>UBR4(-)_CGCTGGGCCGGTGGCAAGCC	>UBR4(-)_CGCTGGGCCGGTGGCAAGCCCCCGGAGGGAGCCGCAGTAGTACGACGG	>UBR4(-)_CCCCGGAGGGAGCCGCAGTAGTACGACGG
chr4	17810728	17810729	DCAF16	111	-	394	189	583	19	176	24	5	29	8	4	6	>DCAF16(-)_TGACTCGGCCGGAAGTAGCG	>DCAF16(-)_TGACTCGGCCGGAAGTAGCGTCGGCGCGGGAGCTGAGCGGAGTGGCCT	>DCAF16(-)_GTCGGCGCGGGAGCTGAGCGGAGTGGCCT
chr12	98593689	98593690	SLC25A3	116	+	234	345	579	271	158	14	15	29	32	21	14	>SLC25A3(+)_GGGCACACATCTTAGGACCC	>SLC25A3(+)_GGGCACACATCTTAGGACCCGGAGGACGTCCGGCCTCTGTGAGCCGCA	>SLC25A3(+)_CGGAGGACGTCCGGCCTCTGTGAGCCGCA
chr9	97697313	97697314	XPA	894	-	388	187	575	20	200	25	4	29	12	8	5	>XPA(-)_GCCTCGGCGTGCAGTGCGCG	>XPA(-)_GCCTCGGCGTGCAGTGCGCGTGCGTGGAGCTGGGAGCTAGGTCCTCGG	>XPA(-)_GTGCGTGGAGCTGGGAGCTAGGTCCTCGG
chr5	163460089	163460090	NUDCD2	54	-	369	200	569	39	190	21	8	29	5	3	0	>NUDCD2(-)_GAGGCGTAGCCTAAGCGTGG	>NUDCD2(-)_GAGGCGTAGCCTAAGCGTGGGATTCCGCGCGTGCGCTCGGCTCCGCCT	>NUDCD2(-)_GGATTCCGCGCGTGCGCTCGGCTCCGCCT
chr2	158968660	158968661	TANC1	78	+	409	160	569	29	187	26	3	29	7	13	3	>TANC1(+)_GGACGGGCCGGAGCGGAGGC	>TANC1(+)_GGACGGGCCGGAGCGGAGGCTTTGCTGTGGCAGCTGCTGGAGCGGCGG	>TANC1(+)_CTTTGCTGTGGCAGCTGCTGGAGCGGCGG
chr7	100119347	100119348	TAF6	230	-	466	96	562	0	205	28	1	29	0	2	1	>TAF6(-)_GGCTCTGCCAGGACCTGCTC	>TAF6(-)_GGCTCTGCCAGGACCTGCTCCCACGAGGGGGCGGGGCCAAGATGGCGC	>TAF6(-)_CCCACGAGGGGGCGGGGCCAAGATGGCGC
chr7	149126276	149126277	ZNF425	66	-	361	198	559	110	139	23	6	29	23	23	15	>ZNF425(-)_CGGCTCTGCCTTTGGGGGCC	>ZNF425(-)_CGGCTCTGCCTTTGGGGGCCAGCAGGGCTGTACCTGGGAGTTGGGTTG	>ZNF425(-)_CAGCAGGGCTGTACCTGGGAGTTGGGTTG
chr20	44475887	44475888	TTPAL	130	+	362	196	558	8	163	26	3	29	11	2	1	>TTPAL(+)_GCCCCGCCTCCCACGCCCTG	>TTPAL(+)_GCCCCGCCTCCCACGCCCTGGATCGTCACTTCCGGCGCGAGAGGCCGG	>TTPAL(+)_GGATCGTCACTTCCGGCGCGAGAGGCCGG
chr8	20197380	20197381	ATP6V1B2	352	+	213	342	555	116	185	16	13	29	21	15	3	>ATP6V1B2(+)_CCGCCTTGGTATATCTGCGC	>ATP6V1B2(+)_CCGCCTTGGTATATCTGCGCGTGCGCGGCGTCGCTGCTGGGCCAGTCG	>ATP6V1B2(+)_CGTGCGCGGCGTCGCTGCTGGGCCAGTCG
chr17	61927981	61927982	INTS2	307	-	280	265	545	48	192	15	14	29	8	13	11	>INTS2(-)_ACGTCTCTGCCTTTCCTCTC	>INTS2(-)_ACGTCTCTGCCTTTCCTCTCGCAGCCACCCTTCCTCTCAGACCAGTAC	>INTS2(-)_CGCAGCCACCCTTCCTCTCAGACCAGTAC
chr5	17217630	17217631	BASP1	1094	+	376	167	543	88	144	28	1	29	27	16	8	>BASP1(+)_GCGAGAAATGCAGAGGCTGC	>BASP1(+)_GCGAGAAATGCAGAGGCTGCAGCGGCGGCGGCGGCGGCAGTAGCGGCA	>BASP1(+)_CAGCGGCGGCGGCGGCGGCAGTAGCGGCA
chr17	76072493	76072494	SRP68	67	-	410	118	528	16	153	25	4	29	4	18	15	>SRP68(-)_CGCCTCCCCTATCCCGTCTT	>SRP68(-)_CGCCTCCCCTATCCCGTCTTGCTCTGCGGCGCAGGGGCAAGATGGCTG	>SRP68(-)_TGCTCTGCGGCGCAGGGGCAAGATGGCTG
chr14	103123460	103123461	TNFAIP2	574	+	313	209	522	162	64	25	4	29	16	17	1	>TNFAIP2(+)_TGCGACTATTTCAGGCCTTG	>TNFAIP2(+)_TGCGACTATTTCAGGCCTTGCGGAACCCGGGCCAGGACAGTGGCGGCC	>TNFAIP2(+)_GCGGAACCCGGGCCAGGACAGTGGCGGCC
chr9	21802658	21802659	MTAP	191	+	356	166	522	30	213	23	6	29	5	10	11	>MTAP(+)_AGGCCCGCCCCTGGTCTCCG	>MTAP(+)_AGGCCCGCCCCTGGTCTCCGCACTGCTCACTCCCGCGCAGTGAGGTTG	>MTAP(+)_GCACTGCTCACTCCCGCGCAGTGAGGTTG
chr1	94418412	94418413	ABCD3	152	+	347	174	521	31	198	23	6	29	14	6	3	>ABCD3(+)_CCCTCTGCTCTCCTCCCAGT	>ABCD3(+)_CCCTCTGCTCTCCTCCCAGTCTCCCCCGCGCTGCGTGCAGTAAGGTAG	>ABCD3(+)_TCTCCCCCGCGCTGCGTGCAGTAAGGTAG
chr8	143973528	143973529	PLEC	801	-	356	159	515	112	101	23	6	29	16	24	3	>PLEC(-)_GGGCGGCCTCTTTAAGCGGC	>PLEC(-)_GGGCGGCCTCTTTAAGCGGCGCGCGCGGCCGCGGGGACAGAGTGGCCG	>PLEC(-)_CGCGCGCGGCCGCGGGGACAGAGTGGCCG
chr14	34462239	34462240	SPTSSA	543	-	248	263	511	136	116	22	7	29	9	11	3	>SPTSSA(-)_CCGGGGGCTTTAGGACGTGA	>SPTSSA(-)_CCGGGGGCTTTAGGACGTGAGCGGGCGGCCGGCCGGACAGACTGACGT	>SPTSSA(-)_AGCGGGCGGCCGGCCGGACAGACTGACGT
chr9	110048697	110048698	AKAP2	498	+	336	173	509	57	156	28	1	29	13	34	9	>AKAP2(+)_CCCGCCCTCCAGCGCGCCCG	>AKAP2(+)_CCCGCCCTCCAGCGCGCCCGGAGGCTACCACTCCCTGCAGATGCGCTG	>AKAP2(+)_GGAGGCTACCACTCCCTGCAGATGCGCTG
chr17	82648443	82648444	WDR45B	312	-	352	154	506	64	152	25	4	29	19	8	4	>WDR45B(-)_ACACACGCACATCCAGCACG	>WDR45B(-)_ACACACGCACATCCAGCACGCACGCACGTACGTCCGGCACTTCCGGCC	>WDR45B(-)_GCACGCACGTACGTCCGGCACTTCCGGCC
chr2	74958670	74958671	POLE4	106	+	437	64	501	7	224	27	2	29	6	11	10	>POLE4(+)_ATGCGCGCGCACAGTCGGCG	>POLE4(+)_ATGCGCGCGCACAGTCGGCGGCCGCGCGCAGCACGCTCAAGGCCGGGA	>POLE4(+)_GGCCGCGCGCAGCACGCTCAAGGCCGGGA
chr2	68252496	68252497	PPP3R1	595	-	305	180	485	110	126	24	5	29	28	12	5	>PPP3R1(-)_TTCGTGCCTTGAGGTTGCGG	>PPP3R1(-)_TTCGTGCCTTGAGGTTGCGGGTCAGCGCGAGCCGCTGCAGTGAGTCCG	>PPP3R1(-)_GGTCAGCGCGAGCCGCTGCAGTGAGTCCG
chr17	41865372	41865373	KLHL11	64	-	398	86	484	17	192	28	1	29	5	20	16	>KLHL11(-)_ATCGTTCCGAGGCTGTGGAG	>KLHL11(-)_ATCGTTCCGAGGCTGTGGAGGCCGGGCGCAGCGGCGTCAAGATGGCGG	>KLHL11(-)_GGCCGGGCGCAGCGGCGTCAAGATGGCGG
chr6	145814758	145814759	FBXO30	78	-	312	157	469	50	196	23	6	29	11	22	9	>FBXO30(-)_GCGCGCGAGGAGGGTGGCTG	>FBXO30(-)_GCGCGCGAGGAGGGTGGCTGCCTCTGGAGCAGGCCGGGAGAAGAGAAA	>FBXO30(-)_GCCTCTGGAGCAGGCCGGGAGAAGAGAAA
chr1	225924265	225924266	PYCR2	40	-	362	107	469	18	194	28	1	29	5	14	4	>PYCR2(-)_AAGGCGCCATCAGCCGCCCG	>PYCR2(-)_AAGGCGCCATCAGCCGCCCGGGAGATATCCGCCGGGGGAGAATAGGGT	>PYCR2(-)_GGGAGATATCCGCCGGGGGAGAATAGGGT
chr1	155689092	155689093	DAP3	42	+	311	157	468	5	200	21	8	29	1	17	8	>DAP3(+)_TGAGTCGTTTCCTGCCGGAT	>DAP3(+)_TGAGTCGTTTCCTGCCGGATGACCCGACCCTTTTTTGCAGTCTCAGGA	>DAP3(+)_TGACCCGACCCTTTTTTGCAGTCTCAGGA
chr1	53220610	53220611	CZIB	43	-	402	65	467	4	202	28	1	29	6	4	2	>CZIB(-)_CGGCACCCGCCTTTTACGAC	>CZIB(-)_CGGCACCCGCCTTTTACGACGCGCCGGAAAGCAACGGCAAGGGCCGCA	>CZIB(-)_CGCGCCGGAAAGCAACGGCAAGGGCCGCA
chr11	45147342	45147343	PRDM11	127	+	362	93	455	19	186	25	4	29	3	11	12	>PRDM11(+)_GACGCCGACGCCAGAGGGCT	>PRDM11(+)_GACGCCGACGCCAGAGGGCTCGCCGCGGCCGCCGGCCTAGTTCTCGCG	>PRDM11(+)_TCGCCGCGGCCGCCGGCCTAGTTCTCGCG
chr11	86800547	86800548	PRSS23	176	+	334	120	454	16	177	28	1	29	13	15	11	>PRSS23(+)_GCCAGCTGCCTGCGCTGCTC	>PRSS23(+)_GCCAGCTGCCTGCGCTGCTCGCCAGCTTGCTCGCACTCGGCTGTGCGG	>PRSS23(+)_CGCCAGCTTGCTCGCACTCGGCTGTGCGG
chr21	31659687	31659688	SOD1	146	+	178	275	453	236	95	15	14	29	17	42	7	>SOD1(+)_AGGTCTGGCCTATAAAGTAG	>SOD1(+)_AGGTCTGGCCTATAAAGTAGTCGCGGAGACGGGGTGCTGGTTTGCGTC	>SOD1(+)_GTCGCGGAGACGGGGTGCTGGTTTGCGTC
chr8	41578201	41578202	GPAT4	101	+	361	79	440	19	202	29	0	29	3	10	1	>GPAT4(+)_CGGCGCAGACAAAGGCGGGC	>GPAT4(+)_CGGCGCAGACAAAGGCGGGCGCGCGCACGTCCTGACGCAGCTTGGGCC	>GPAT4(+)_CGCGCGCACGTCCTGACGCAGCTTGGGCC
chr1	55215361	55215362	USP24	45	-	361	78	439	2	209	20	9	29	3	10	12	>USP24(-)_CGGCCCCGCCGCCCGGGGAG	>USP24(-)_CGGCCCCGCCGCCCGGGGAGGAGGAGGCGGAGGGGGAGGAGGCCAACA	>USP24(-)_GGAGGAGGCGGAGGGGGAGGAGGCCAACA
chr2	182716259	182716260	DNAJC10	102	+	326	112	438	12	156	23	6	29	7	6	1	>DNAJC10(+)_ACGCCTTTCCCACAATGCTC	>DNAJC10(+)_ACGCCTTTCCCACAATGCTCCGCGCCAGGCCCCGCCCCGGCTCGCCGT	>DNAJC10(+)_CCGCGCCAGGCCCCGCCCCGGCTCGCCGT
chr3	57693076	57693077	DENND6A	95	-	337	98	435	17	148	27	2	29	6	0	4	>DENND6A(-)_AGCGGCTGCGACAGCAGCGT	>DENND6A(-)_AGCGGCTGCGACAGCAGCGTCTGCGCCTGCGCGGAGGCAAGCGCGCTC	>DENND6A(-)_TCTGCGCCTGCGCGGAGGCAAGCGCGCTC
chr1	92298986	92298987	GLMN	173	-	355	73	428	7	164	26	3	29	5	2	2	>GLMN(-)_GAGGCCCCGCCTCCCTACGC	>GLMN(-)_GAGGCCCCGCCTCCCTACGCGTAGCGCGGGGCGGGGCCAGAAGAGCGG	>GLMN(-)_CGTAGCGCGGGGCGGGGCCAGAAGAGCGG
chr6	30571443	30571444	ABCF1	85	+	312	107	419	36	211	26	3	29	8	8	7	>ABCF1(+)_GAGCCAGCCCCATCGGGGTT	>ABCF1(+)_GAGCCAGCCCCATCGGGGTTCCCCGCCGCCGGAAGCGGAAATAGCACC	>ABCF1(+)_TCCCCGCCGCCGGAAGCGGAAATAGCACC
chr11	67401824	67401825	PPP1CA	65	-	352	67	419	14	188	26	3	29	2	11	11	>PPP1CA(-)_GAGCCAGGCCGGAAGGAGGC	>PPP1CA(-)_GAGCCAGGCCGGAAGGAGGCTGCCGGAGGGCGGGAGGCAGGAGCGGGC	>PPP1CA(-)_CTGCCGGAGGGCGGGAGGCAGGAGCGGGC
chr12	113185452	113185453	DDX54	74	-	330	88	418	9	183	22	7	29	9	10	25	>DDX54(-)_CAGGCCACGCCCCCTTCTGC	>DDX54(-)_CAGGCCACGCCCCCTTCTGCGTTCCCAGCGCGCGGCCCGAATGGCGGC	>DDX54(-)_CGTTCCCAGCGCGCGGCCCGAATGGCGGC
chr1	219173877	219173878	LYPLAL1	421	+	253	162	415	40	154	24	5	29	22	4	14	>LYPLAL1(+)_CCCGCGCGGCAACGCAGGGG	>LYPLAL1(+)_CCCGCGCGGCAACGCAGGGGCGGAACCGCATGACTGGCAGTGGCATCA	>LYPLAL1(+)_GCGGAACCGCATGACTGGCAGTGGCATCA
chr15	42548773	42548774	LRRC57	86	-	307	102	409	10	204	24	5	29	1	1	0	>LRRC57(-)_GGCGCGGCTCGATGACGTCA	>LRRC57(-)_GGCGCGGCTCGATGACGTCACAGGGCGTTCCCGCCCGGGACTAAGCCG	>LRRC57(-)_ACAGGGCGTTCCCGCCCGGGACTAAGCCG
chr20	49915491	49915492	SPATA2	149	-	346	60	406	13	205	27	2	29	4	12	9	>SPATA2(-)_TGTTTCCGGGTCGCTGCTGG	>SPATA2(-)_TGTTTCCGGGTCGCTGCTGGCCCCCGGGTACTGGTCTCAGTACCCCTG	>SPATA2(-)_GCCCCCGGGTACTGGTCTCAGTACCCCTG
chr2	231781278	231781279	PDE6D	164	-	325	79	404	13	267	25	4	29	5	7	7	>PDE6D(-)_GGAGGGCACTGCGAGGCTAG	>PDE6D(-)_GGAGGGCACTGCGAGGCTAGGGGGAAGGAGAAGGGATCAGAAGCGGGA	>PDE6D(-)_GGGGGAAGGAGAAGGGATCAGAAGCGGGA
chr9	127877673	127877674	AK1	358	-	336	65	401	173	107	29	0	29	12	110	15	>AK1(-)_GACAGCCTTATAAATAGTCG	>AK1(-)_GACAGCCTTATAAATAGTCGCCTTTGCCGGCCGCCGCGAGGACGGGCA	>AK1(-)_GCCTTTGCCGGCCGCCGCGAGGACGGGCA
chr12	64452137	64452138	TBK1	205	+	291	108	399	25	154	18	11	29	10	11	14	>TBK1(+)_CGGCCAGGGCTTGCGAAGCC	>TBK1(+)_CGGCCAGGGCTTGCGAAGCCGGAAGTGTCCTGAGTCTCGAGGAGGCCG	>TBK1(+)_CGGAAGTGTCCTGAGTCTCGAGGAGGCCG
chr11	72223898	72223899	INPPL1	142	+	310	89	399	4	202	27	2	29	2	28	16	>INPPL1(+)_CGGCGCGGAGGGCGGGGGCG	>INPPL1(+)_CGGCGCGGAGGGCGGGGGCGCGCGCGGATGGCCATCTTAAGTGGCCGC	>INPPL1(+)_GCGCGCGGATGGCCATCTTAAGTGGCCGC
chr2	55232687	55232688	RPS27A	328	+	196	201	397	198	153	19	10	29	44	23	11	>RPS27A(+)_AGCTCCGGGAAACCCCGTGG	>RPS27A(+)_AGCTCCGGGAAACCCCGTGGGCCTGCGCGGCGTTCTTCCTTTTCGATC	>RPS27A(+)_GGCCTGCGCGGCGTTCTTCCTTTTCGATC
chr2	61905673	61905674	COMMD1	290	+	271	121	392	56	212	25	4	29	16	4	0	>COMMD1(+)_CGGGGCACGGCTCAGCTGTT	>COMMD1(+)_CGGGGCACGGCTCAGCTGTTGCGGGGCGGGGCCTTCGCAGAGCATGGC	>COMMD1(+)_TGCGGGGCGGGGCCTTCGCAGAGCATGGC
chr1	28236153	28236154	ATP5IF1	517	+	241	148	389	58	137	28	1	29	14	9	8	>ATP5IF1(+)_CTGCCATTAGCGCGTAACGA	>ATP5IF1(+)_CTGCCATTAGCGCGTAACGAGAGACTGCTTGCTGCGGCAGAGACGCCA	>ATP5IF1(+)_AGAGACTGCTTGCTGCGGCAGAGACGCCA
chr10	73247254	73247255	DNAJC9	70	-	291	96	387	16	163	21	8	29	6	11	10	>DNAJC9(-)_CGCAGGCGCCCTGGGCTTTT	>DNAJC9(-)_CGCAGGCGCCCTGGGCTTTTTGGGCGCGAAAAAGAAGCAGTCCTGGGT	>DNAJC9(-)_TTGGGCGCGAAAAAGAAGCAGTCCTGGGT
chr7	43906595	43906596	URGCP	31	-	332	54	386	3	163	27	2	29	5	2	4	>URGCP(-)_CCGAGCCGCGGCCGCGCGGA	>URGCP(-)_CCGAGCCGCGGCCGCGCGGAGGAAGCGAAGGAGGCGGGAGCGGAGACC	>URGCP(-)_AGGAAGCGAAGGAGGCGGGAGCGGAGACC
chr7	43906595	43906596	URGCP-MRPS24	31	-	332	54	386	3	163	27	2	29	5	2	4	>URGCP-MRPS24(-)_CCGAGCCGCGGCCGCGCGGA	>URGCP-MRPS24(-)_CCGAGCCGCGGCCGCGCGGAGGAAGCGAAGGAGGCGGGAGCGGAGACC	>URGCP-MRPS24(-)_AGGAAGCGAAGGAGGCGGGAGCGGAGACC
chr9	86099525	86099526	GOLM1	35	-	346	38	384	13	186	28	1	29	5	0	1	>GOLM1(-)_GAGGCCGGAGACGCGGCGGC	>GOLM1(-)_GAGGCCGGAGACGCGGCGGCGCTGGACGCGGAGGCGCTGGGCGCACGG	>GOLM1(-)_CGCTGGACGCGGAGGCGCTGGGCGCACGG
chr15	65133807	65133808	PDCD7	118	-	245	135	380	38	172	24	5	29	13	23	7	>PDCD7(-)_TCGGAAGGTTCTCATGAGGA	>PDCD7(-)_TCGGAAGGTTCTCATGAGGAGCCACTCAGATTCCTGTCACTTCTCAAA	>PDCD7(-)_AGCCACTCAGATTCCTGTCACTTCTCAAA
chr5	123036696	123036697	PPIC	40	-	300	75	375	6	252	28	1	29	6	1	10	>PPIC(-)_CCGGGAGCGCGCAGGCGCAG	>PPIC(-)_CCGGGAGCGCGCAGGCGCAGCCGGCCGGCAGTCCCGTCAGCTGTCCCA	>PPIC(-)_GCCGGCCGGCAGTCCCGTCAGCTGTCCCA
chr11	6320500	6320501	CAVIN3	355	-	248	123	371	44	124	24	5	29	9	7	4	>CAVIN3(-)_GGAGGCCCCTGACCGTAGTG	>CAVIN3(-)_GGAGGCCCCTGACCGTAGTGCGGCCAGCAGTTGCAGGCAGACGGAGCA	>CAVIN3(-)_GCGGCCAGCAGTTGCAGGCAGACGGAGCA
chr3	49674350	49674351	APEH	58	+	355	16	371	2	209	26	3	29	1	0	2	>APEH(+)_CAGCCCGGGCCGTCCCAGGC	>APEH(+)_CAGCCCGGGCCGTCCCAGGCTCCGCCCCCGGAAGCCTCACTTCCGGGC	>APEH(+)_CTCCGCCCCCGGAAGCCTCACTTCCGGGC
chr14	49893098	49893099	ARF6	220	+	178	191	369	49	119	22	7	29	42	12	21	>ARF6(+)_GCGGTTTCCTCGGCGCCTTT	>ARF6(+)_GCGGTTTCCTCGGCGCCTTTTCCGGCAGCGGCGGCGGCAGAACTGGGA	>ARF6(+)_TTCCGGCAGCGGCGGCGGCAGAACTGGGA
chr12	122752820	122752821	DENR	91	+	318	51	369	2	191	27	2	29	2	9	6	>DENR(+)_TCCGCCCAGCGGCGGCCGGA	>DENR(+)_TCCGCCCAGCGGCGGCCGGAATCTCGCGATAAAGGCTCATTGTCTCGC	>DENR(+)_AATCTCGCGATAAAGGCTCATTGTCTCGC
chr5	163505638	163505639	MAT2B	89	+	277	89	366	11	179	24	5	29	4	7	4	>MAT2B(+)_GCCGAGGGCGTCTGAGCTGA	>MAT2B(+)_GCCGAGGGCGTCTGAGCTGAGGCCCGCGTCGATCCTGGGTTGGAGGAG	>MAT2B(+)_AGGCCCGCGTCGATCCTGGGTTGGAGGAG
chr1	51236272	51236273	RNF11	108	+	327	38	365	0	126	28	1	29	1	1	4	>RNF11(+)_CCGGGGGCGGGACCAGAGCA	>RNF11(+)_CCGGGGGCGGGACCAGAGCACGCACGGCGCGATGACGCAGTGCCCGAG	>RNF11(+)_ACGCACGGCGCGATGACGCAGTGCCCGAG
chr1	154183186	154183187	TPM3	133	-	167	194	361	111	94	24	5	29	24	20	12	>TPM3(-)_TTCCGGTATTTCAGGGCGTA	>TPM3(-)_TTCCGGTATTTCAGGGCGTAGCAGGCGGAAGTAAGGGTGAGAGGAGGC	>TPM3(-)_AGCAGGCGGAAGTAAGGGTGAGAGGAGGC
chr6	90587066	90587067	MAP3K7	68	-	261	94	355	10	122	26	3	29	12	4	4	>MAP3K7(-)_CCGGAACCGGAAGTGTAGTG	>MAP3K7(-)_CCGGAACCGGAAGTGTAGTGGGCGGGGCCCGTCGGCGGAAAACGCAGC	>MAP3K7(-)_GGGCGGGGCCCGTCGGCGGAAAACGCAGC
chr22	29307059	29307060	GAS2L1	56	+	295	60	355	9	179	27	2	29	3	8	4	>GAS2L1(+)_AGACGGCGGCGAGGAGGAGG	>GAS2L1(+)_AGACGGCGGCGAGGAGGAGGCCGCGGCGCGGGACGCATAGAGCTGCGG	>GAS2L1(+)_GCCGCGGCGCGGGACGCATAGAGCTGCGG
chr5	149551390	149551391	CSNK1A1	159	-	226	128	354	108	203	18	11	29	38	6	12	>CSNK1A1(-)_TCTGCGCCGTGAAGAAGCGG	>CSNK1A1(-)_TCTGCGCCGTGAAGAAGCGGCTCCCGGGGACTGGGGGCATTTTGTGTT	>CSNK1A1(-)_GCTCCCGGGGACTGGGGGCATTTTGTGTT
chr12	6568290	6568291	NOP2	49	-	190	162	352	12	170	23	6	29	7	6	2	>NOP2(-)_AGGCTAGCGCTACCCGTGCG	>NOP2(-)_AGGCTAGCGCTACCCGTGCGCCTGCGTGGAACGATTCTGTGGCGAGTG	>NOP2(-)_GCCTGCGTGGAACGATTCTGTGGCGAGTG
chr1	171742064	171742065	VAMP4	138	-	303	47	350	7	214	25	4	29	3	9	2	>VAMP4(-)_CTCCGCCTGGCGCCAGGCCG	>VAMP4(-)_CTCCGCCTGGCGCCAGGCCGCCGAGCGCCGATCGGCTCGATGAGCGGA	>VAMP4(-)_GCCGAGCGCCGATCGGCTCGATGAGCGGA
chr5	69094089	69094090	SLC30A5	275	+	265	82	347	16	182	28	1	29	12	3	7	>SLC30A5(+)_CGGAACTGATCGCGGCCTAG	>SLC30A5(+)_CGGAACTGATCGCGGCCTAGTCCCGACGCGTGTGTGCTAGTGAGCCGG	>SLC30A5(+)_GTCCCGACGCGTGTGTGCTAGTGAGCCGG
chr17	47896548	47896549	SP2	59	+	290	57	347	8	160	22	7	29	9	3	1	>SP2(+)_GACTCCCCGCCCCCTCGGAG	>SP2(+)_GACTCCCCGCCCCCTCGGAGCCCGCCGGGCGGGAGGGCGGCGCTTCCG	>SP2(+)_GCCCGCCGGGCGGGAGGGCGGCGCTTCCG
chr10	91798448	91798449	TNKS2	156	+	264	82	346	14	150	25	4	29	5	8	1	>TNKS2(+)_AGGAGGGGCCTTGCCAGCTT	>TNKS2(+)_AGGAGGGGCCTTGCCAGCTTCCGCCGCCGCGTCGTTTCAGGACCCGGA	>TNKS2(+)_TCCGCCGCCGCGTCGTTTCAGGACCCGGA
chr2	3379721	3379722	TRAPPC12	274	+	272	73	345	11	194	25	4	29	6	5	14	>TRAPPC12(+)_TGGGGGCAGGGCCTCGGGTT	>TRAPPC12(+)_TGGGGGCAGGGCCTCGGGTTCCTGCATCGGGCCTGAGCAGAACTAGGC	>TRAPPC12(+)_TCCTGCATCGGGCCTGAGCAGAACTAGGC
chr2	38602921	38602922	HNRNPLL	728	-	252	92	344	43	132	24	5	29	5	11	8	>HNRNPLL(-)_GAGGGAAGACCGGAAGCCAC	>HNRNPLL(-)_GAGGGAAGACCGGAAGCCACGGTTGCGTCCCCATCCTTAGATTCGCTC	>HNRNPLL(-)_CGGTTGCGTCCCCATCCTTAGATTCGCTC
chr2	27212262	27212263	SLC5A6	122	-	299	45	344	42	219	26	3	29	7	5	4	>SLC5A6(-)_GGCCCTCTTCCCCGGGCGTG	>SLC5A6(-)_GGCCCTCTTCCCCGGGCGTGGCCTAAGCGGCCCGGTCCAGTCGCCCTG	>SLC5A6(-)_GGCCTAAGCGGCCCGGTCCAGTCGCCCTG
chr19	11925110	11925111	ZNF700	67	+	251	93	344	18	196	27	2	29	7	10	8	>ZNF700(+)_CCACAGTTCATCCGGAAATG	>ZNF700(+)_CCACAGTTCATCCGGAAATGGAGGGGGTCGCTTTCCTCACCTTCCTCG	>ZNF700(+)_GGAGGGGGTCGCTTTCCTCACCTTCCTCG
chr1	9651745	9651746	PIK3CD	39	+	249	94	343	6	159	24	5	29	3	3	6	>PIK3CD(+)_CCCGCCTCCCTCCCTCGAGG	>PIK3CD(+)_CCCGCCTCCCTCCCTCGAGGCTCACTCGCGCCCAGCGCAGTCGCTCCG	>PIK3CD(+)_GCTCACTCGCGCCCAGCGCAGTCGCTCCG
chr1	110339446	110339447	RBM15	85	+	254	88	342	0	206	27	2	29	1	8	12	>RBM15(+)_AGGACTGCGGGGCGGGACCC	>RBM15(+)_AGGACTGCGGGGCGGGACCCTGTGCCGCGGCGGAGTCCAAGATGGCGG	>RBM15(+)_CTGTGCCGCGGCGGAGTCCAAGATGGCGG
chr19	18153194	18153195	PIK3R2	100	+	290	40	330	7	188	27	2	29	5	3	4	>PIK3R2(+)_CGGGCCAGGCCGCTCGGAAC	>PIK3R2(+)_CGGGCCAGGCCGCTCGGAACCGTGGCGGCGGCGGAGGCGGGGATCCCG	>PIK3R2(+)_CCGTGGCGGCGGCGGAGGCGGGGATCCCG
chr9	125261827	125261828	GAPVD1	32	+	272	56	328	1	228	27	2	29	6	1	14	>GAPVD1(+)_ACGCGCGCTGGCGTGGCGGC	>GAPVD1(+)_ACGCGCGCTGGCGTGGCGGCAGCGCCGCTGCAGGACGCAGGGAAGCCA	>GAPVD1(+)_CAGCGCCGCTGCAGGACGCAGGGAAGCCA
chr1	12230071	12230072	VPS13D	47	+	278	45	323	3	162	26	3	29	2	4	5	>VPS13D(+)_GCGCCGCGGGCCTGCGCCAT	>VPS13D(+)_GCGCCGCGGGCCTGCGCCATTGAGGAGCGGCGGGGAGGAAACGCCGCG	>VPS13D(+)_TTGAGGAGCGGCGGGGAGGAAACGCCGCG
chr17	76453149	76453150	UBE2O	100	-	242	78	320	15	184	27	2	29	1	20	8	>UBE2O(-)_TCGCCGCCGCTGTCGCCGCC	>UBE2O(-)_TCGCCGCCGCTGTCGCCGCCGCCGCCCGAGACTCGCGCAGAGCAGTTA	>UBE2O(-)_CGCCGCCCGAGACTCGCGCAGAGCAGTTA
chr20	54208097	54208098	PFDN4	58	+	220	97	317	0	251	23	6	29	2	1	4	>PFDN4(+)_ATTGCGGCCCTCCCCGCCGC	>PFDN4(+)_ATTGCGGCCCTCCCCGCCGCCTGCGGTAGTCCAGTCCCAAGATGGCGG	>PFDN4(+)_CCTGCGGTAGTCCAGTCCCAAGATGGCGG
chr1	211830728	211830729	LPGAT1	42	-	290	21	311	5	136	27	2	29	7	6	4	>LPGAT1(-)_CGCCAGTCCGGGCGAACGCG	>LPGAT1(-)_CGCCAGTCCGGGCGAACGCGGCCGGGCCCTTGGGGACCGAGTCTCGGC	>LPGAT1(-)_GGCCGGGCCCTTGGGGACCGAGTCTCGGC
chr19	2236849	2236850	SF3A2	74	+	241	69	310	21	170	26	3	29	10	1	5	>SF3A2(+)_GCCCCGGAAGTGCTTTCTTT	>SF3A2(+)_GCCCCGGAAGTGCTTTCTTTGCCCGCCGTTCGCCAAACGAAGTCGTGG	>SF3A2(+)_TGCCCGCCGTTCGCCAAACGAAGTCGTGG
chr5	112861304	112861305	SRP19	158	+	212	97	309	12	251	25	4	29	4	2	8	>SRP19(+)_AGGACTTCCGGCGGAAAAGC	>SRP19(+)_AGGACTTCCGGCGGAAAAGCGGGCTGTCTCGGAAACTCAGAGCCGGGT	>SRP19(+)_CGGGCTGTCTCGGAAACTCAGAGCCGGGT
chr13	28659156	28659157	POMP	76	+	239	66	305	19	186	27	2	29	11	9	5	>POMP(+)_CGGAAGTGAGCGGCGGGGTC	>POMP(+)_CGGAAGTGAGCGGCGGGGTCGACTGACGGTAACGGGGCAGAGAGGCTG	>POMP(+)_CGACTGACGGTAACGGGGCAGAGAGGCTG
chr7	5898801	5898802	CCZ1	100	+	276	29	305	1	82	29	0	29	0	7	1	>CCZ1(+)_GCCGTGGGAGGCTCCCGAGG	>CCZ1(+)_GCCGTGGGAGGCTCCCGAGGTGGGGGCCGGGGCGGGATGGCTGCAGCG	>CCZ1(+)_GTGGGGGCCGGGGCGGGATGGCTGCAGCG
chr22	37953698	37953699	POLR2F	146	+	235	60	295	15	183	29	0	29	10	1	8	>POLR2F(+)_GAAGTGATTTCCTCTGGGTT	>POLR2F(+)_GAAGTGATTTCCTCTGGGTTACGGCGCAGGCGCAAGATAAGCTAGGAG	>POLR2F(+)_TACGGCGCAGGCGCAAGATAAGCTAGGAG
chr20	41136958	41136959	PLCG1	41	+	235	58	293	6	291	28	1	29	4	0	1	>PLCG1(+)_ACCAATCCGCAGGCAGCCCC	>PLCG1(+)_ACCAATCCGCAGGCAGCCCCGCCCCCGCCCCTCCCGGGAGAGGGCGCG	>PLCG1(+)_CGCCCCCGCCCCTCCCGGGAGAGGGCGCG
chr1	36385911	36385912	STK40	278	-	181	108	289	7	210	24	5	29	0	6	5	>STK40(-)_GCTGGGGAGGAGGGGGGCGG	>STK40(-)_GCTGGGGAGGAGGGGGGCGGTGCGTCACTTCCGTTGTCAGGTGGCGGC	>STK40(-)_GTGCGTCACTTCCGTTGTCAGGTGGCGGC
chr11	74493709	74493710	LIPT2	69	-	208	68	276	8	117	27	2	29	0	1	5	>LIPT2(-)_GGCCCACGGAGAGGGCGGGG	>LIPT2(-)_GGCCCACGGAGAGGGCGGGGCCCCGCGGACGCAACGGTGGGCACGATG	>LIPT2(-)_GCCCCGCGGACGCAACGGTGGGCACGATG
chr11	119168724	119168725	NLRX1	37	+	212	56	268	16	215	29	0	29	8	16	6	>NLRX1(+)_CTGGCGCTTGGGAACCTGCA	>NLRX1(+)_CTGGCGCTTGGGAACCTGCAGAGGGCAGTACTAGCGGCAGTGCCCGCG	>NLRX1(+)_AGAGGGCAGTACTAGCGGCAGTGCCCGCG
chr4	183504762	183504763	ING2	92	+	222	28	250	2	206	28	1	29	0	0	3	>ING2(+)_GCAGGCGCAGAGGCGGCCGC	>ING2(+)_GCAGGCGCAGAGGCGGCCGCGGGCGGAGGGGCGGGGGCAGGCTAGCGG	>ING2(+)_CGGGCGGAGGGGCGGGGGCAGGCTAGCGG
chr19	10231305	10231306	S1PR2	119	-	182	64	246	6	116	27	2	29	2	1	4	>S1PR2(-)_CGCCCCCCCCTCTGTCCCTC	>S1PR2(-)_CGCCCCCCCCTCTGTCCCTCGTCCCAGCCCCGGGACTTAGCCGAGCCC	>S1PR2(-)_CGTCCCAGCCCCGGGACTTAGCCGAGCCC
chr20	44651726	44651727	ADA	142	-	226	19	245	1	171	27	2	29	2	1	1	>ADA(-)_CGGCGGCGGGCGGGGCGGGA	>ADA(-)_CGGCGGCGGGCGGGGCGGGAGGCGGGGCCCGGCCCGTTAAGAAGAGCG	>ADA(-)_AGGCGGGGCCCGGCCCGTTAAGAAGAGCG
chr17	40647817	40647818	SMARCE1	52	-	183	59	242	3	233	25	4	29	6	2	0	>SMARCE1(-)_CGGAAGCTCCGGACGCGAGG	>SMARCE1(-)_CGGAAGCTCCGGACGCGAGGGGCGGGGCGAGCGCGGGACAAAGGGAAG	>SMARCE1(-)_GGGCGGGGCGAGCGCGGGACAAAGGGAAG
chr19	32345633	32345634	ZNF507	35	+	193	48	241	3	173	27	2	29	1	3	6	>ZNF507(+)_CCCACCCGCGGCTCACGTGA	>ZNF507(+)_CCCACCCGCGGCTCACGTGATCCGTCCCCAGCGCCGCCATTTTGGAGC	>ZNF507(+)_ATCCGTCCCCAGCGCCGCCATTTTGGAGC
chr19	40690650	40690651	NUMBL	211	-	158	79	237	14	122	29	0	29	0	1	2	>NUMBL(-)_AGCCGAGGCCGAGGGACGCT	>NUMBL(-)_AGCCGAGGCCGAGGGACGCTCCCCCGCCCCCGGAACGGAATCCTCCCG	>NUMBL(-)_TCCCCCGCCCCCGGAACGGAATCCTCCCG
chr1	228165803	228165804	IBA57	87	+	211	26	237	5	205	29	0	29	1	4	10	>IBA57(+)_CCGCCCCTCCCGCTTCCTTG	>IBA57(+)_CCGCCCCTCCCGCTTCCTTGGGCCCTTCCCGCTGCCCCACTCTTGTCC	>IBA57(+)_GGGCCCTTCCCGCTGCCCCACTCTTGTCC
chr13	37000787	37000788	EXOSC8	116	+	137	86	223	6	201	24	5	29	6	0	2	>EXOSC8(+)_GGCGGAACAGGCGCGCAGGA	>EXOSC8(+)_GGCGGAACAGGCGCGCAGGAGAGGAGCGGCGCAGGCGCAGACGCGCGG	>EXOSC8(+)_AGAGGAGCGGCGCAGGCGCAGACGCGCGG
chr7	135557930	135557931	NUP205	46	+	139	83	222	12	202	21	8	29	6	27	11	>NUP205(+)_CCTTTCCCGGGGCCTCCATG	>NUP205(+)_CCTTTCCCGGGGCCTCCATGCGGCAGAAGGGCTCTGTTAGTGCGCCTC	>NUP205(+)_GCGGCAGAAGGGCTCTGTTAGTGCGCCTC
chr12	109880435	109880436	GLTP	33	-	178	43	221	6	141	28	1	29	3	0	0	>GLTP(-)_GGGCGGCTGTGACGGCCCCG	>GLTP(-)_GGGCGGCTGTGACGGCCCCGGCGCTGACGGCGGCGGCCGGGGGGGCGG	>GLTP(-)_GGCGCTGACGGCGGCGGCCGGGGGGGCGG
chr19	54137761	54137762	CNOT3	393	+	136	65	201	42	172	26	3	29	7	8	7	>CNOT3(+)_ACGAGAAGAGAGGAGGGGAG	>CNOT3(+)_ACGAGAAGAGAGGAGGGGAGGCCTCCTCCGCCGCCGCCATCTTGGACC	>CNOT3(+)_GGCCTCCTCCGCCGCCGCCATCTTGGACC
chr19	7920366	7920367	SNAPC2	17	+	176	17	193	7	221	29	0	29	0	12	4	>SNAPC2(+)_AGAAGCGACCTTACAGCGCC	>SNAPC2(+)_AGAAGCGACCTTACAGCGCCTGCCTCTTTCTGAGCGGCATGAAGCCAC	>SNAPC2(+)_CTGCCTCTTTCTGAGCGGCATGAAGCCAC
chr10	133308913	133308914	ZNF511	25	+	171	15	186	1	286	27	2	29	1	3	0	>ZNF511(+)_CGTGACGTCACGTCCGGCTC	>ZNF511(+)_CGTGACGTCACGTCCGGCTCGGCTCGCGGACGGTGGCCGACAGGCTGC	>ZNF511(+)_CGGCTCGCGGACGGTGGCCGACAGGCTGC
chr1	1658971	1658972	CDK11B	48	-	148	36	184	5	181	26	3	29	4	11	14	>CDK11B(-)_ACAGGAAGTGACGATACTTT	>CDK11B(-)_ACAGGAAGTGACGATACTTTTGGCGCGCGCCGGTTGCTGTTTCTTCTC	>CDK11B(-)_TTGGCGCGCGCCGGTTGCTGTTTCTTCTC
chr11	57741490	57741491	SELENOH	71	+	100	38	138	32	120	26	3	29	6	6	2	>SELENOH(+)_CTTTCCCTTCCTTTGAGAGA	>SELENOH(+)_CTTTCCCTTCCTTTGAGAGAGGTTTCCGCTGTAGGAGCAGAGCTTCCG	>SELENOH(+)_AGGTTTCCGCTGTAGGAGCAGAGCTTCCG
chr16	1771512	1771513	NME3	21	-	99	38	137	7	125	27	2	29	0	6	2	>NME3(-)_GCTCCCGCACCGCCATCATG	>NME3(-)_GCTCCCGCACCGCCATCATGATCTGCCTGGTGCTGACCATCTTCGCTA	>NME3(-)_GATCTGCCTGGTGCTGACCATCTTCGCTA
chr16	30949067	30949068	ORAI3	111	+	102	32	134	12	115	25	4	29	3	4	7	>ORAI3(+)_CCCCATCATGTGGCTAGCCC	>ORAI3(+)_CCCCATCATGTGGCTAGCCCCGGCTCCGCCTCTGTCCCAGTTCCTGTT	>ORAI3(+)_CCGGCTCCGCCTCTGTCCCAGTTCCTGTT
chr19	39834149	39834150	DYRK1B	46	-	54	9	63	1	161	26	3	29	0	2	3	>DYRK1B(-)_AGTCCAGGGCGTGGGGGGGC	>DYRK1B(-)_AGTCCAGGGCGTGGGGGGGCCGGTTTGTTGTGGTCGCCATTTTGCTGG	>DYRK1B(-)_CCGGTTTGTTGTGGTCGCCATTTTGCTGG
chr3	196082089	196082090	TFRC	461	-	389	473	862	88	124	23	5	28	8	75	23	>TFRC(-)_CAGGCTATAAACCGCCGGTT	>TFRC(-)_CAGGCTATAAACCGCCGGTTAGGGGCCGCCATCCCCTCAGAGCGTCGG	>TFRC(-)_TAGGGGCCGCCATCCCCTCAGAGCGTCGG
chr15	66504845	66504846	RPL4	113	-	454	281	735	260	183	22	6	28	59	26	11	>RPL4(-)_GGGAAGGTGACATATACAGC	>RPL4(-)_GGGAAGGTGACATATACAGCGGGAGTGGTAAGCACTTCCTTTTCCTGT	>RPL4(-)_CGGGAGTGGTAAGCACTTCCTTTTCCTGT
chr17	43398992	43398993	ARL4D	1011	+	361	352	713	166	140	22	6	28	26	58	15	>ARL4D(+)_ACGCGGGTTTTTAAGGCCGA	>ARL4D(+)_ACGCGGGTTTTTAAGGCCGAACCCTAGGCAGGCTCTGCAGAGGCAGCG	>ARL4D(+)_AACCCTAGGCAGGCTCTGCAGAGGCAGCG
chr3	53256021	53256022	TKT	259	-	290	407	697	237	100	17	11	28	51	24	10	>TKT(-)_CGCCCGGCGACTTAACGCGC	>TKT(-)_CGCCCGGCGACTTAACGCGCCCCCGCCCCGCGCCCGGCCTCGGCAGCC	>TKT(-)_CCCCCGCCCCGCGCCCGGCCTCGGCAGCC
chr1	45803611	45803612	MAST2	53	+	553	143	696	9	124	25	3	28	7	4	4	>MAST2(+)_GCGCGCGCGTGAGGGGCGGG	>MAST2(+)_GCGCGCGCGTGAGGGGCGGGGCCGGCCGAAGGCTGGCTGTAGGCAGGC	>MAST2(+)_GGCCGGCCGAAGGCTGGCTGTAGGCAGGC
chr5	140346602	140346603	HBEGF	628	-	436	249	685	112	214	22	6	28	8	64	26	>HBEGF(-)_CTGGAGCCTTATTCCCGGCC	>HBEGF(-)_CTGGAGCCTTATTCCCGGCCGCGAGCCGGGCAGCGCTCATTCGGCCGA	>HBEGF(-)_CGCGAGCCGGGCAGCGCTCATTCGGCCGA
chr9	113594128	113594129	RGS3	689	+	240	433	673	292	96	14	14	28	70	12	6	>RGS3(+)_CTGTCTGAGTCCCAGCCCCG	>RGS3(+)_CTGTCTGAGTCCCAGCCCCGGCTTGTGCCTGGGAGTCCAGTCATCAGG	>RGS3(+)_GGCTTGTGCCTGGGAGTCCAGTCATCAGG
chr7	76358988	76358989	YWHAG	2803	-	294	374	668	205	170	15	13	28	34	35	16	>YWHAG(-)_GCAGGGGGTTGTCCGTCAGT	>YWHAG(-)_GCAGGGGGTTGTCCGTCAGTGGCACGCACAGCAGCCGCAGCCGCCTCG	>YWHAG(-)_TGGCACGCACAGCAGCCGCAGCCGCCTCG
chr11	27506766	27506767	LIN7C	292	-	397	243	640	23	211	23	5	28	5	5	4	>LIN7C(-)_CACCTCAGCCCTTCTGTCGT	>LIN7C(-)_CACCTCAGCCCTTCTGTCGTCATTTCCTGTGGGTCTGTAGGTTAAGGG	>LIN7C(-)_TCATTTCCTGTGGGTCTGTAGGTTAAGGG
chr1	227947931	227947932	WNT9A	302	-	229	406	635	421	122	17	11	28	44	78	11	>WNT9A(-)_CCGGGCGCTATAAGAGGGCG	>WNT9A(-)_CCGGGCGCTATAAGAGGGCGGCGGCCGCGGCGCGCCCTGCGCGGAGCT	>WNT9A(-)_GGCGGCCGCGGCGCGCCCTGCGCGGAGCT
chr17	75405670	75405671	GRB2	130	-	509	126	635	7	174	25	3	28	5	16	19	>GRB2(-)_AAGTTCTCGCGGGACACCGA	>GRB2(-)_AAGTTCTCGCGGGACACCGACGGGGAGCGGAAGCCAGGAGGTATTGCT	>GRB2(-)_ACGGGGAGCGGAAGCCAGGAGGTATTGCT
chr20	56629305	56629306	TFAP2C	867	+	298	329	627	148	134	21	7	28	15	24	4	>TFAP2C(+)_CCTTCTCATTAAGGCGCTCG	>TFAP2C(+)_CCTTCTCATTAAGGCGCTCGGGTCCCCCGGCTATCGCCAGGACACACT	>TFAP2C(+)_GGGTCCCCCGGCTATCGCCAGGACACACT
chr10	124418922	124418923	OAT	590	-	218	392	610	423	151	15	13	28	44	87	23	>OAT(-)_AATCAGCCTTTAAGTTGCAG	>OAT(-)_AATCAGCCTTTAAGTTGCAGTGACTCTCCGGCGTCACTGTTGCGCTTC	>OAT(-)_GTGACTCTCCGGCGTCACTGTTGCGCTTC
chr12	46372770	46372771	SLC38A2	590	-	112	492	604	525	59	11	17	28	72	39	13	>SLC38A2(-)_GGTGCCGCTATAACCCGCCG	>SLC38A2(-)_GGTGCCGCTATAACCCGCCGCTCGCAGGGCTGCTCCACAGCCGCGCGA	>SLC38A2(-)_GCTCGCAGGGCTGCTCCACAGCCGCGCGA
chr6	83859688	83859689	CYB5R4	157	+	485	87	572	11	172	27	1	28	1	2	7	>CYB5R4(+)_AATGCGCCTCACCCCTGGCG	>CYB5R4(+)_AATGCGCCTCACCCCTGGCGACCCCGGAAGTGGGTCGGGGGCTTGGCC	>CYB5R4(+)_GACCCCGGAAGTGGGTCGGGGGCTTGGCC
chr12	111405922	111405923	SH2B3	55	+	361	179	540	15	112	21	7	28	17	21	0	>SH2B3(+)_CCCCCGCCGGGCTCCGCTCG	>SH2B3(+)_CCCCCGCCGGGCTCCGCTCGCACGGCCGGTTCCTCTTTACATAACGGC	>SH2B3(+)_GCACGGCCGGTTCCTCTTTACATAACGGC
chr2	200811909	200811910	BZW1	183	+	300	238	538	19	176	24	4	28	4	31	10	>BZW1(+)_TCCGGGCGGGGGTGGCACCT	>BZW1(+)_TCCGGGCGGGGGTGGCACCTCTCCCTCCTCCTGGCGTTAGTTCCGGTC	>BZW1(+)_TCTCCCTCCTCCTGGCGTTAGTTCCGGTC
chr2	219253915	219253916	TUBA4A	63	-	272	263	535	141	142	23	5	28	12	50	14	>TUBA4A(-)_CCCCGCCTATAAGGGCGGTG	>TUBA4A(-)_CCCCGCCTATAAGGGCGGTGCGGCACTGCAGCTAGCGCAGTTCTCACT	>TUBA4A(-)_GCGGCACTGCAGCTAGCGCAGTTCTCACT
chr12	52006944	52006945	GRASP	1137	+	256	273	529	475	86	18	10	28	61	106	27	>GRASP(+)_GGAGCCTATAAAGGGAGGCG	>GRASP(+)_GGAGCCTATAAAGGGAGGCGACCCGCGGCCCGCCCGGCTGGCATCCCC	>GRASP(+)_GACCCGCGGCCCGCCCGGCTGGCATCCCC
chr10	100286673	100286674	BLOC1S2	146	-	305	218	523	12	180	26	2	28	10	3	9	>BLOC1S2(-)_ACACCCAGTGCGCATGCGCA	>BLOC1S2(-)_ACACCCAGTGCGCATGCGCAGCACCCCGGCCCGGAAACAGCGCGGGGT	>BLOC1S2(-)_AGCACCCCGGCCCGGAAACAGCGCGGGGT
chr2	73234307	73234308	CCT7	135	+	382	137	519	51	165	24	4	28	14	27	12	>CCT7(+)_CCCGGCCCAAGCTTCTGGGT	>CCT7(+)_CCCGGCCCAAGCTTCTGGGTATTTCTATTGCGCGAGGCATTGTGGGTT	>CCT7(+)_TATTTCTATTGCGCGAGGCATTGTGGGTT
chr17	47831525	47831526	MRPL10	144	-	282	235	517	61	196	21	7	28	19	3	2	>MRPL10(-)_AATCCTTAGCTCTTTCCGTC	>MRPL10(-)_AATCCTTAGCTCTTTCCGTCTCCACTCGGCTTCCGTCCATTCTTCCGG	>MRPL10(-)_CTCCACTCGGCTTCCGTCCATTCTTCCGG
chr14	55129248	55129249	LGALS3	143	+	208	307	515	104	135	17	11	28	13	63	12	>LGALS3(+)_GGCTGGGAGTATTTGAGGCT	>LGALS3(+)_GGCTGGGAGTATTTGAGGCTCGGAGCCACCGCCCCGCCGGCGCCCGCA	>LGALS3(+)_TCGGAGCCACCGCCCCGCCGGCGCCCGCA
chr13	77327085	77327086	MYCBP2	244	-	356	159	515	5	145	24	4	28	2	9	5	>MYCBP2(-)_GAGGAGTGGCGCATGCTCTG	>MYCBP2(-)_GAGGAGTGGCGCATGCTCTGTGAGGCCGGCAGCTTCCCATTGCGGGTA	>MYCBP2(-)_GTGAGGCCGGCAGCTTCCCATTGCGGGTA
chr9	128818499	128818500	ENDOG	70	+	366	146	512	168	126	24	4	28	16	55	14	>ENDOG(+)_TACCGGCGTCTTAAATGCGC	>ENDOG(+)_TACCGGCGTCTTAAATGCGCAAAGAAAGGACGCCGGGGACACCCGGTT	>ENDOG(+)_CAAAGAAAGGACGCCGGGGACACCCGGTT
chr2	169827453	169827454	UBR3	144	+	255	256	511	14	223	22	6	28	15	3	2	>UBR3(+)_GTTGGGCGGGCCGAGCAATC	>UBR3(+)_GTTGGGCGGGCCGAGCAATCGCAGCAGTCTATTCCCTCACTCTCCCTG	>UBR3(+)_CGCAGCAGTCTATTCCCTCACTCTCCCTG
chr3	38137438	38137439	MYD88	387	+	190	320	510	153	151	17	11	28	22	37	16	>MYD88(+)_TTTCCACCTTTTGTAGCCAA	>MYD88(+)_TTTCCACCTTTTGTAGCCAAACCCGAGACCTGACCCCCAAATCCCTGT	>MYD88(+)_AACCCGAGACCTGACCCCCAAATCCCTGT
chr7	66740732	66740733	RABGEF1	866	+	300	194	494	77	131	21	7	28	15	20	14	>RABGEF1(+)_GGAGGGTGGGTGTGAGGCGG	>RABGEF1(+)_GGAGGGTGGGTGTGAGGCGGGAGCTGGCCGCGGAGCCCAGACCTACCC	>RABGEF1(+)_GGAGCTGGCCGCGGAGCCCAGACCTACCC
chr6	109094846	109094847	SESN1	52	-	439	55	494	9	196	26	2	28	7	7	5	>SESN1(-)_AAGGGCGGGCTTTGCGCCTC	>SESN1(-)_AAGGGCGGGCTTTGCGCCTCGGGCCCCGCCGCCCCGCCAGCTCCGCGG	>SESN1(-)_CGGGCCCCGCCGCCCCGCCAGCTCCGCGG
chr12	1691069	1691070	ADIPOR2	344	+	357	135	492	34	130	27	1	28	10	18	13	>ADIPOR2(+)_GGCGGCGGTCGCTGTCGCGG	>ADIPOR2(+)_GGCGGCGGTCGCTGTCGCGGCGGCGAGAGCGCGATTCCAGAAGCGGCA	>ADIPOR2(+)_GCGGCGAGAGCGCGATTCCAGAAGCGGCA
chr5	80408069	80408070	ZFYVE16	110	+	376	114	490	36	189	27	1	28	5	9	5	>ZFYVE16(+)_GCGGGGAAAGAAGCCCTGAG	>ZFYVE16(+)_GCGGGGAAAGAAGCCCTGAGCCGGGATCTGGCACTCCCAGGACTCCCG	>ZFYVE16(+)_GCCGGGATCTGGCACTCCCAGGACTCCCG
chr12	11171173	11171174	SMIM10L1	65	+	429	58	487	7	182	24	4	28	0	1	1	>SMIM10L1(+)_ATGGTAAATGCCACAGTGAG	>SMIM10L1(+)_ATGGTAAATGCCACAGTGAGAAGCAGACAGGAAGGGGCGGAGCGCCAG	>SMIM10L1(+)_GAAGCAGACAGGAAGGGGCGGAGCGCCAG
chr6	131951371	131951372	CCN2	568	-	118	367	485	458	108	9	19	28	27	40	6	>CCN2(-)_GGAGCGTATAAAAGCCTCGG	>CCN2(-)_GGAGCGTATAAAAGCCTCGGGCCGCCCGCCCCAAACTCACACAACAAC	>CCN2(-)_GGCCGCCCGCCCCAAACTCACACAACAAC
chr4	183659143	183659144	RWDD4	64	-	371	114	485	38	145	23	5	28	7	16	14	>RWDD4(-)_TCCCAGGCCCCACCAGCCGC	>RWDD4(-)_TCCCAGGCCCCACCAGCCGCGGCTCCGGCTCGTAGCCCACAGCCCACT	>RWDD4(-)_CGGCTCCGGCTCGTAGCCCACAGCCCACT
chr19	4791744	4791745	FEM1A	287	+	428	55	483	16	301	28	0	28	14	16	29	>FEM1A(+)_GGTCGCGGCAGCCATTTTGT	>FEM1A(+)_GGTCGCGGCAGCCATTTTGTTCCGCCCGAGGAGACCCTAAGATGGCGG	>FEM1A(+)_TTCCGCCCGAGGAGACCCTAAGATGGCGG
chr17	11997463	11997464	ZNF18	387	-	410	71	481	25	113	25	3	28	9	8	3	>ZNF18(-)_CGCCTGCCGCCTGAGGCGCG	>ZNF18(-)_CGCCTGCCGCCTGAGGCGCGCGCAGCCACCCAGCTCCCGGAAGTGCGC	>ZNF18(-)_GCGCAGCCACCCAGCTCCCGGAAGTGCGC
chr14	74763365	74763366	YLPM1	55	+	428	51	479	16	168	27	1	28	9	7	11	>YLPM1(+)_GGGCCCAGCTCGGGAGCGCC	>YLPM1(+)_GGGCCCAGCTCGGGAGCGCCGGCGCACTGGCGCGCTCCGTTTACACGC	>YLPM1(+)_CGGCGCACTGGCGCGCTCCGTTTACACGC
chr7	19709025	19709026	TWISTNB	153	-	390	84	474	20	195	27	1	28	3	12	8	>TWISTNB(-)_ATTGTGCTTGCGTCAACGGC	>TWISTNB(-)_ATTGTGCTTGCGTCAACGGCGCGCGCCGTGGGAACCTTGACAAGCAGC	>TWISTNB(-)_CGCGCGCCGTGGGAACCTTGACAAGCAGC
chr22	20858760	20858761	PI4KA	63	-	446	22	468	7	176	28	0	28	2	2	1	>PI4KA(-)_GCCTGCGCCCTGAGGTCGGG	>PI4KA(-)_GCCTGCGCCCTGAGGTCGGGCGCTCGCGGGCCAGGAGCGGGGAGCCGG	>PI4KA(-)_GCGCTCGCGGGCCAGGAGCGGGGAGCCGG
chr7	129434431	129434432	STRIP2	43	+	367	94	461	4	246	23	5	28	5	18	4	>STRIP2(+)_GCCTGGCTCCCGGCGCGCGG	>STRIP2(+)_GCCTGGCTCCCGGCGCGCGGCGGTAGGGTCGCCTCCGGCAAAGCGAGC	>STRIP2(+)_GCGGTAGGGTCGCCTCCGGCAAAGCGAGC
chr3	126655068	126655069	TXNRD3	189	-	372	83	455	10	193	21	7	28	5	1	2	>TXNRD3(-)_GTGAGAGTGGCCAGCGAGGG	>TXNRD3(-)_GTGAGAGTGGCCAGCGAGGGCAGCGTTCGCCGCCCCTCAGGCCCCGTC	>TXNRD3(-)_GCAGCGTTCGCCGCCCCTCAGGCCCCGTC
chr20	62796480	62796481	MRGBP	36	+	362	88	450	5	206	26	2	28	8	3	0	>MRGBP(+)_CCCGCCCCCGAGTGCGCCTG	>MRGBP(+)_CCCGCCCCCGAGTGCGCCTGCGCGGAGCTCGTGGCCGCGCCTGCTCCC	>MRGBP(+)_GCGCGGAGCTCGTGGCCGCGCCTGCTCCC
chr10	6089033	6089034	RBM17	75	+	363	86	449	2	230	28	0	28	0	3	1	>RBM17(+)_GCGCAGGCGGGGCGCAGGCG	>RBM17(+)_GCGCAGGCGGGGCGCAGGCGCGGGCGCGCTCTCCCGGCAGCCCGCGCT	>RBM17(+)_GCGGGCGCGCTCTCCCGGCAGCCCGCGCT
chr17	64919467	64919468	LRRC37A3	248	-	192	255	447	25	169	18	10	28	9	3	0	>LRRC37A3(-)_GCTCGTAGGCTGCTCAGCTC	>LRRC37A3(-)_GCTCGTAGGCTGCTCAGCTCACGTGACCGCGCTCCGGTAACGGAAGAA	>LRRC37A3(-)_CACGTGACCGCGCTCCGGTAACGGAAGAA
chr1	85259653	85259654	C1orf52	183	-	334	113	447	5	208	25	3	28	2	2	3	>C1orf52(-)_GCTTCCGGTTTCCGGTTTCC	>C1orf52(-)_GCTTCCGGTTTCCGGTTTCCGGCTTCCGGCGGAGTGCTGGGTTGTCGC	>C1orf52(-)_CGGCTTCCGGCGGAGTGCTGGGTTGTCGC
chr14	55051664	55051665	MAPK1IP1L	186	+	301	146	447	4	140	24	4	28	1	3	2	>MAPK1IP1L(+)_GCGGAGGCGGTGCGCTCGGC	>MAPK1IP1L(+)_GCGGAGGCGGTGCGCTCGGCGCTTCCTGTTCCGGCGCCAGGAGGAGCC	>MAPK1IP1L(+)_CGCTTCCTGTTCCGGCGCCAGGAGGAGCC
chr15	74433957	74433958	SEMA7A	335	-	260	186	446	83	122	24	4	28	2	13	8	>SEMA7A(-)_CCTGGCGCTTGGGTCTGCCT	>SEMA7A(-)_CCTGGCGCTTGGGTCTGCCTGCGGCCGGGCGCTGGCTCAGTCTCGGCT	>SEMA7A(-)_TGCGGCCGGGCGCTGGCTCAGTCTCGGCT
chr8	143246938	143246939	ZFP41	132	+	332	111	443	13	233	24	4	28	6	5	3	>ZFP41(+)_TAGCGCGGCCGCCGGAAGGG	>ZFP41(+)_TAGCGCGGCCGCCGGAAGGGGCGGGTCAGCGGGCGGGCATTTCCTGCC	>ZFP41(+)_GGCGGGTCAGCGGGCGGGCATTTCCTGCC
chr22	31081317	31081318	SMTN	544	+	174	262	436	140	136	20	8	28	27	32	14	>SMTN(+)_CAGCCGGGCTGCTGGCGCGG	>SMTN(+)_CAGCCGGGCTGCTGGCGCGGCTGGACGGGCAGCTCTCCGCAGAATCCA	>SMTN(+)_GCTGGACGGGCAGCTCTCCGCAGAATCCA
chr11	116788022	116788023	ZPR1	93	-	313	118	431	2	157	24	4	28	3	1	2	>ZPR1(-)_TGACGGGAGAGGGGTGGGGC	>ZPR1(-)_TGACGGGAGAGGGGTGGGGCCGCGAGAGCGGCGGAAGTAGGAAGCCGA	>ZPR1(-)_CCGCGAGAGCGGCGGAAGTAGGAAGCCGA
chr6	7590220	7590221	SNRNP48	158	+	320	110	430	26	178	25	3	28	6	1	7	>SNRNP48(+)_CCGCCCACAGCTCCCAGAGG	>SNRNP48(+)_CCGCCCACAGCTCCCAGAGGCCTGCGCGTGCGGTCTGCAGTTCGGCCG	>SNRNP48(+)_GCCTGCGCGTGCGGTCTGCAGTTCGGCCG
chr8	102655722	102655723	KLF10	569	-	170	259	429	90	108	17	11	28	36	6	3	>KLF10(-)_CGGGGCAGGCTGAGCGGCTA	>KLF10(-)_CGGGGCAGGCTGAGCGGCTACCTGAATGGGGAGGGGGCAGACGGCGCT	>KLF10(-)_ACCTGAATGGGGAGGGGGCAGACGGCGCT
chr16	89873644	89873645	TCF25	91	+	364	65	429	12	141	28	0	28	1	7	6	>TCF25(+)_GACAGCCGAGTTTTCTGCGC	>TCF25(+)_GACAGCCGAGTTTTCTGCGCTTCCTTCTCCCTCTCTCCAGACGTCGTG	>TCF25(+)_CTTCCTTCTCCCTCTCTCCAGACGTCGTG
chr7	108569922	108569923	DNAJB9	39	+	226	200	426	111	133	25	3	28	23	16	11	>DNAJB9(+)_GCCAGCGGCTACCTCCTGCC	>DNAJB9(+)_GCCAGCGGCTACCTCCTGCCTGTGAGGAGCTGGCTGAGAGGGGACTGG	>DNAJB9(+)_CTGTGAGGAGCTGGCTGAGAGGGGACTGG
chr2	109613915	109613916	SEPT10	115	-	275	151	426	65	186	19	9	28	13	16	11	>SEPT10(-)_GCGGAGGCAGCCTAGCCTCG	>SEPT10(-)_GCGGAGGCAGCCTAGCCTCGCGCCCCGCCCGTTGCTTCTGCCCTCCGG	>SEPT10(-)_GCGCCCCGCCCGTTGCTTCTGCCCTCCGG
chr12	108731517	108731518	CORO1C	573	-	174	250	424	36	133	12	16	28	10	5	7	>CORO1C(-)_GGTGGCGGCTGCCCGCGCCC	>CORO1C(-)_GGTGGCGGCTGCCCGCGCCCCTCCCCCGCACGGCGCTCAGTGCCAGGC	>CORO1C(-)_CCTCCCCCGCACGGCGCTCAGTGCCAGGC
chr11	9384651	9384652	IPO7	67	+	230	191	421	91	147	22	6	28	18	57	14	>IPO7(+)_GCGAAGAGGTTCTATCCGGG	>IPO7(+)_GCGAAGAGGTTCTATCCGGGGCCTTGGCGCTTCTCTTTCCTTTCGCGC	>IPO7(+)_GGCCTTGGCGCTTCTCTTTCCTTTCGCGC
chr3	52685881	52685882	PBRM1	110	-	398	14	412	11	168	28	0	28	3	13	4	>PBRM1(-)_CGGGACTGGTTTTGCGGCGG	>PBRM1(-)_CGGGACTGGTTTTGCGGCGGCACCGGGAGGGGTAAGGGAGGTGAGGGC	>PBRM1(-)_GCACCGGGAGGGGTAAGGGAGGTGAGGGC
chr5	172006648	172006649	FBXW11	24	-	364	42	406	18	201	25	3	28	5	7	8	>FBXW11(-)_TGTAGTCCCCGATCTGCGTA	>FBXW11(-)_TGTAGTCCCCGATCTGCGTACTGCGTTCGCCGAGGGGGAGGGCGGAGC	>FBXW11(-)_ACTGCGTTCGCCGAGGGGGAGGGCGGAGC
chr1	23559498	23559499	ID3	55	-	211	192	403	461	155	19	9	28	68	53	15	>ID3(-)_CAGGCTCTATAAGTGACCGC	>ID3(-)_CAGGCTCTATAAGTGACCGCCGCGGCGAGCGTGCGCGCGTTGCAGGTC	>ID3(-)_CCGCGGCGAGCGTGCGCGCGTTGCAGGTC
chr8	23246640	23246641	CHMP7	232	+	316	86	402	22	262	25	3	28	6	8	6	>CHMP7(+)_AGGTGGTCAAGGAACGGAAG	>CHMP7(+)_AGGTGGTCAAGGAACGGAAGCCGGGAGGGAACGAGGGCGGAAGCGGAC	>CHMP7(+)_GCCGGGAGGGAACGAGGGCGGAAGCGGAC
chr15	76311442	76311443	ETFA	331	-	261	141	402	8	199	22	6	28	8	1	7	>ETFA(-)_CGTCTCGCGAGCATTAGGTG	>ETFA(-)_CGTCTCGCGAGCATTAGGTGACTGGCTGAGGCGGCGCCAGTTGGCCGG	>ETFA(-)_GACTGGCTGAGGCGGCGCCAGTTGGCCGG
chr9	134135402	134135403	WDR5	233	+	333	69	402	8	155	25	3	28	7	11	7	>WDR5(+)_GTGAGTTTGCGCACTGCGGA	>WDR5(+)_GTGAGTTTGCGCACTGCGGAGCGGGCGCGGGTGACTCCAGAGCGGCCC	>WDR5(+)_AGCGGGCGCGGGTGACTCCAGAGCGGCCC
chr2	97995924	97995925	TMEM131	447	-	282	119	401	75	218	22	6	28	30	39	26	>TMEM131(-)_AGGCCAGCGCTCAGGGCTCG	>TMEM131(-)_AGGCCAGCGCTCAGGGCTCGCGGGCCGTGCCCGTTTCCAGTATGGCCG	>TMEM131(-)_GCGGGCCGTGCCCGTTTCCAGTATGGCCG
chr8	81721294	81721295	ZFAND1	144	-	294	103	397	12	226	24	4	28	5	4	8	>ZFAND1(-)_GCTCATTGCCCCGCCCCTCA	>ZFAND1(-)_GCTCATTGCCCCGCCCCTCAGGCTTTGCCCCGCCCCTTACGGCGCCGG	>ZFAND1(-)_AGGCTTTGCCCCGCCCCTTACGGCGCCGG
chr9	136410657	136410658	PMPCA	100	+	241	156	397	7	206	20	8	28	3	0	2	>PMPCA(+)_GCCGTGGGCGGAAGCGGAAG	>PMPCA(+)_GCCGTGGGCGGAAGCGGAAGTGACGACTGAAGCGGGGCGGAGACGCAA	>PMPCA(+)_GTGACGACTGAAGCGGGGCGGAGACGCAA
chr16	85799699	85799700	COX4I1	28	+	249	141	390	47	167	26	2	28	23	26	24	>COX4I1(+)_CGATCCCGTGGTGCTCCGCG	>COX4I1(+)_CGATCCCGTGGTGCTCCGCGGCGCGGCCTTGCTCTCTTCCGGTCGCGG	>COX4I1(+)_GGCGCGGCCTTGCTCTCTTCCGGTCGCGG
chr5	55307672	55307673	DHX29	137	-	298	92	390	5	207	23	5	28	8	2	4	>DHX29(-)_AGCGGTCGCCCCGGCCCGAG	>DHX29(-)_AGCGGTCGCCCCGGCCCGAGAAGCCCGGATCGAAGCGCAGGGTGGCAG	>DHX29(-)_GAAGCCCGGATCGAAGCGCAGGGTGGCAG
chr3	140941842	140941843	SLC25A36	75	+	263	125	388	39	181	19	9	28	9	18	7	>SLC25A36(+)_ACTCTCCGTCGCGCTGCGCT	>SLC25A36(+)_ACTCTCCGTCGCGCTGCGCTGCGTCGCTTTCAGCCTCTGGTGAAGGGC	>SLC25A36(+)_TGCGTCGCTTTCAGCCTCTGGTGAAGGGC
chr21	36320221	36320222	MORC3	113	+	238	149	387	19	159	21	7	28	5	5	4	>MORC3(+)_CCCATAGGGCTCCACAGTCG	>MORC3(+)_CCCATAGGGCTCCACAGTCGTTCCGCCACCTCCCAGTCGGGTTGCGGC	>MORC3(+)_GTTCCGCCACCTCCCAGTCGGGTTGCGGC
chr13	31161903	31161904	HSPH1	219	-	165	216	381	69	84	17	11	28	6	8	2	>HSPH1(-)_GCGATACATAAGGCTGAGGA	>HSPH1(-)_GCGATACATAAGGCTGAGGAAGTGGGACCTCCCCTTTTGGGTCGGTAG	>HSPH1(-)_AAGTGGGACCTCCCCTTTTGGGTCGGTAG
chr2	101252916	101252917	CNOT11	33	+	335	42	377	4	204	27	1	28	5	1	0	>CNOT11(+)_TAACAGCGCGCTTTACGGCC	>CNOT11(+)_TAACAGCGCGCTTTACGGCCGCGGGGACGGAGCGAGCCGGCGCCAGGG	>CNOT11(+)_CGCGGGGACGGAGCGAGCCGGCGCCAGGG
chr2	177264726	177264727	NFE2L2	104	-	260	112	372	4	145	24	4	28	6	8	7	>NFE2L2(-)_GGAGGCGGAGCGGGGCAGGG	>NFE2L2(-)_GGAGGCGGAGCGGGGCAGGGGCCCGCCGGCGTGTAGCCGATTACCGAG	>NFE2L2(-)_GGCCCGCCGGCGTGTAGCCGATTACCGAG
chr1	220094169	220094170	IARS2	48	+	309	62	371	9	190	27	1	28	4	4	1	>IARS2(+)_ACTCGGCTCCCCTTGGTTTC	>IARS2(+)_ACTCGGCTCCCCTTGGTTTCCTGGGGTCCTGCCCCTTCAAGCTGGGGC	>IARS2(+)_CCTGGGGTCCTGCCCCTTCAAGCTGGGGC
chrX	101391014	101391015	RPL36A	136	+	186	183	369	204	86	22	6	28	44	39	13	>RPL36A(+)_AACCTCCTATATACTTCCGT	>RPL36A(+)_AACCTCCTATATACTTCCGTTTGCCTCGCGGTTTCTTTCTTTCCGCGC	>RPL36A(+)_TTTGCCTCGCGGTTTCTTTCTTTCCGCGC
chrX	101391014	101391015	RPL36A-HNRNPH2	136	+	186	183	369	204	86	22	6	28	44	39	13	>RPL36A-HNRNPH2(+)_AACCTCCTATATACTTCCGT	>RPL36A-HNRNPH2(+)_AACCTCCTATATACTTCCGTTTGCCTCGCGGTTTCTTTCTTTCCGCGC	>RPL36A-HNRNPH2(+)_TTTGCCTCGCGGTTTCTTTCTTTCCGCGC
chr2	108534469	108534470	LIMS1	2583	+	157	210	367	73	63	18	10	28	22	6	5	>LIMS1(+)_GCCCCTGGCCTTCCTCCCCT	>LIMS1(+)_GCCCCTGGCCTTCCTCCCCTTCCTGCTCCGGGCCCGCCAGTAGCCGGC	>LIMS1(+)_TTCCTGCTCCGGGCCCGCCAGTAGCCGGC
chr4	186723816	186723817	FAT1	16	-	301	57	358	4	190	26	2	28	2	0	0	>FAT1(-)_AGCGTGAGGCGCCGGCGCCG	>FAT1(-)_AGCGTGAGGCGCCGGCGCCGAGCTGGGCGGCCGGGCGCGGGGAGAGGG	>FAT1(-)_GAGCTGGGCGGCCGGGCGCGGGGAGAGGG
chr16	70346904	70346905	DDX19A	124	+	255	102	357	20	193	25	3	28	21	6	8	>DDX19A(+)_ACCTGTGCTCACCGCCGCTT	>DDX19A(+)_ACCTGTGCTCACCGCCGCTTCCGGTCCGCGTGAGGTGCATTCTCGCGC	>DDX19A(+)_TCCGGTCCGCGTGAGGTGCATTCTCGCGC
chr12	27524205	27524206	PPFIBP1	156	+	258	98	356	44	180	23	5	28	7	10	7	>PPFIBP1(+)_ACTGGGAGTGATGTCAGCTC	>PPFIBP1(+)_ACTGGGAGTGATGTCAGCTCCCAGCTCGGTGCCTGCCCGGATTCCTGA	>PPFIBP1(+)_CCCAGCTCGGTGCCTGCCCGGATTCCTGA
chr2	201780921	201780922	ALS2	52	-	232	123	355	9	178	22	6	28	3	4	8	>ALS2(-)_CCATGAATCAGCTGATCCCG	>ALS2(-)_CCATGAATCAGCTGATCCCGCGGACCCACTGGGTTGCCAAGCTCGCGC	>ALS2(-)_GCGGACCCACTGGGTTGCCAAGCTCGCGC
chr9	21335395	21335396	KLHL9	48	-	279	76	355	7	233	27	1	28	2	2	8	>KLHL9(-)_CAGTAGCCGCTAAGGCCGCT	>KLHL9(-)_CAGTAGCCGCTAAGGCCGCTCCCACCCCGTGGTATCCTGGGACTAGGC	>KLHL9(-)_TCCCACCCCGTGGTATCCTGGGACTAGGC
chr5	127030557	127030558	MARCH3	66	-	167	187	354	55	213	20	8	28	13	7	4	>MARCH3(-)_CTCCAGAGCCTGGTCGGCTT	>MARCH3(-)_CTCCAGAGCCTGGTCGGCTTAGCCCTGCTTTCCGCCTCACTCGTTGAG	>MARCH3(-)_TAGCCCTGCTTTCCGCCTCACTCGTTGAG
chr19	3700467	3700468	PIP5K1C	270	-	286	67	353	16	162	27	1	28	10	9	1	>PIP5K1C(-)_GTCCGCCCCGCGCCGGCCCG	>PIP5K1C(-)_GTCCGCCCCGCGCCGGCCCGGCGCGCCCTCCCTTGGCCGGCGGCGCTT	>PIP5K1C(-)_GGCGCGCCCTCCCTTGGCCGGCGGCGCTT
chr5	134176946	134176947	SKP1	76	-	236	116	352	524	173	25	3	28	51	300	84	>SKP1(-)_TCTCCTATAAAGCAGACGCC	>SKP1(-)_TCTCCTATAAAGCAGACGCCGCGCCGCGCTGCGACGCTGTAGTGGCTT	>SKP1(-)_CGCGCCGCGCTGCGACGCTGTAGTGGCTT
chr7	100706127	100706128	POP7	56	+	260	88	348	16	191	27	1	28	10	11	14	>POP7(+)_CATAGCTCGCGGGGTACGGG	>POP7(+)_CATAGCTCGCGGGGTACGGGCGCGCGTGCGCACTCCGCAGCCCGTTCA	>POP7(+)_GCGCGCGTGCGCACTCCGCAGCCCGTTCA
chr5	178627054	178627055	CLK4	49	-	251	94	345	14	182	26	2	28	9	6	6	>CLK4(-)_GCGGCGTAGGTGGTGCTAGA	>CLK4(-)_GCGGCGTAGGTGGTGCTAGAGGCGACTCGGGGGATTCTAGGGCGACGG	>CLK4(-)_AGGCGACTCGGGGGATTCTAGGGCGACGG
chr5	110739006	110739007	SLC25A46	220	+	223	116	339	4	238	26	2	28	4	1	5	>SLC25A46(+)_CGAAGACTTCCGGGTTTCCA	>SLC25A46(+)_CGAAGACTTCCGGGTTTCCAACGTGACTTCCGGTTGTCAGAATTTACC	>SLC25A46(+)_AACGTGACTTCCGGTTGTCAGAATTTACC
chr19	10566007	10566008	KRI1	201	-	238	99	337	12	108	22	6	28	7	15	9	>KRI1(-)_GTCCAGGGCTTCCTCAATGC	>KRI1(-)_GTCCAGGGCTTCCTCAATGCGCGTGCGCAATGGGCCACAGAACCGCCA	>KRI1(-)_CGCGTGCGCAATGGGCCACAGAACCGCCA
chr2	98608489	98608490	COA5	146	-	217	118	335	14	169	23	5	28	7	9	5	>COA5(-)_CCCGCCGGAAGTTGTTGCCG	>COA5(-)_CCCGCCGGAAGTTGTTGCCGCTGGCTTCCGGTCCCCTGAGACTGGGGC	>COA5(-)_GCTGGCTTCCGGTCCCCTGAGACTGGGGC
chr2	170929252	170929253	GORASP2	67	+	264	69	333	6	218	27	1	28	0	22	19	>GORASP2(+)_GCGGCCCGGCTCTCCGGCGG	>GORASP2(+)_GCGGCCCGGCTCTCCGGCGGCAGCGAGTGCCACGTCCCAAGTGCTACG	>GORASP2(+)_GCAGCGAGTGCCACGTCCCAAGTGCTACG
chr18	12377208	12377209	AFG3L2	175	-	276	53	329	24	105	25	3	28	9	3	3	>AFG3L2(-)_GCGGCAGGAGACGCCGCGTT	>AFG3L2(-)_GCGGCAGGAGACGCCGCGTTGAGAGCTTGGGCTCCTCCGTGAGCCGCC	>AFG3L2(-)_TGAGAGCTTGGGCTCCTCCGTGAGCCGCC
chr9	15422875	15422876	SNAPC3	77	+	239	86	325	27	166	27	1	28	6	17	5	>SNAPC3(+)_CCTTGATCTGCAGGCTTTTG	>SNAPC3(+)_CCTTGATCTGCAGGCTTTTGCAGGGGAAGGAGTGGGGCGAACATGGCT	>SNAPC3(+)_GCAGGGGAAGGAGTGGGGCGAACATGGCT
chr2	241687006	241687007	ING5	52	+	271	52	323	4	130	26	2	28	1	0	2	>ING5(+)_CGCCGCCACTGGAGCCGTGT	>ING5(+)_CGCCGCCACTGGAGCCGTGTCCTGGGCTTCCGGGGCGGAAACTGGGGC	>ING5(+)_TCCTGGGCTTCCGGGGCGGAAACTGGGGC
chr19	3500673	3500674	DOHH	38	-	261	61	322	8	248	24	4	28	5	11	6	>DOHH(-)_GCGGCTGCGTTGGTGCCGTC	>DOHH(-)_GCGGCTGCGTTGGTGCCGTCCGGCACGGTCACGTGGGCGAGAAAATGG	>DOHH(-)_CCGGCACGGTCACGTGGGCGAGAAAATGG
chr1	11262516	11262517	MTOR	29	-	267	55	322	5	167	26	2	28	3	5	9	>MTOR(-)_CCTCGCTCCCGGCTTAGAGG	>MTOR(-)_CCTCGCTCCCGGCTTAGAGGACAGCGGGGAAGGCGGGCGGTGGGGCAG	>MTOR(-)_GACAGCGGGGAAGGCGGGCGGTGGGGCAG
chr19	9819065	9819066	FBXL12	59	-	249	72	321	16	188	25	3	28	5	8	6	>FBXL12(-)_CACTCCAGCCCCGCCTTCTG	>FBXL12(-)_CACTCCAGCCCCGCCTTCTGGACTTGGTCTTAGTTCCCAGTCGCGGCC	>FBXL12(-)_GGACTTGGTCTTAGTTCCCAGTCGCGGCC
chr16	22297433	22297434	POLR3E	45	+	262	59	321	13	161	27	1	28	3	13	15	>POLR3E(+)_CCCGCTCCCCCCCACGTGTC	>POLR3E(+)_CCCGCTCCCCCCCACGTGTCCGCCGGAGTTTCTCCACCAGCAACATGG	>POLR3E(+)_CCGCCGGAGTTTCTCCACCAGCAACATGG
chr5	32444712	32444713	ZFR	26	-	269	48	317	6	211	25	3	28	0	2	4	>ZFR(-)_GAGGCGGCGGTCTGTTCTCC	>ZFR(-)_GAGGCGGCGGTCTGTTCTCCGCTGAGGAGGAGCGGGGCAGAGGAGGGA	>ZFR(-)_CGCTGAGGAGGAGCGGGGCAGAGGAGGGA
chr10	68988815	68988816	KIF1BP	95	+	245	68	313	31	202	25	3	28	4	34	10	>KIF1BP(+)_GAAGGCGGGAGTCCCGACTG	>KIF1BP(+)_GAAGGCGGGAGTCCCGACTGCAAACATTGAGGAAAGCCAGGCAGTAGA	>KIF1BP(+)_GCAAACATTGAGGAAAGCCAGGCAGTAGA
chr16	89217711	89217712	ZNF778	75	+	252	61	313	14	246	27	1	28	3	5	4	>ZNF778(+)_CCCTCTTCCGGCGCCGGCCC	>ZNF778(+)_CCCTCTTCCGGCGCCGGCCCCGCCTCCGCCTGTCTTACAGCTGATCCG	>ZNF778(+)_CCGCCTCCGCCTGTCTTACAGCTGATCCG
chr18	3247820	3247821	MYL12A	57	+	153	159	312	57	105	19	9	28	10	0	5	>MYL12A(+)_GCTTCCTTCCGGCTTGCTAA	>MYL12A(+)_GCTTCCTTCCGGCTTGCTAAGCAGAGGCCGGAAGCGGTGGTTTTTAGC	>MYL12A(+)_AGCAGAGGCCGGAAGCGGTGGTTTTTAGC
chr19	10502714	10502715	KEAP1	47	-	250	62	312	45	110	26	2	28	20	12	6	>KEAP1(-)_GATGGAGGCGCCGGGGCTCG	>KEAP1(-)_GATGGAGGCGCCGGGGCTCGGGCGGTGGAGGCGGAGCCGGAGCGCGGC	>KEAP1(-)_GGGCGGTGGAGGCGGAGCCGGAGCGCGGC
chr11	30323103	30323104	ARL14EP	90	+	177	134	311	40	226	21	7	28	13	7	9	>ARL14EP(+)_GGCGTTGAGCTCCTCTAGCC	>ARL14EP(+)_GGCGTTGAGCTCCTCTAGCCCGCGCTTGCCGTCCTCTCAGTGGTAGCG	>ARL14EP(+)_CCGCGCTTGCCGTCCTCTCAGTGGTAGCG
chr14	66508157	66508158	GPHN	23	+	150	159	309	71	192	19	9	28	17	5	7	>GPHN(+)_CCCCGCAACCTCCAGAGCGT	>GPHN(+)_CCCCGCAACCTCCAGAGCGTGTGCTATCCTTTCCTCTCAGTCCTGCCA	>GPHN(+)_TGTGCTATCCTTTCCTCTCAGTCCTGCCA
chr10	28533132	28533133	WAC	62	+	216	93	309	6	107	24	4	28	5	7	10	>WAC(+)_GTTTCCCGAAGGCGGCAGCG	>WAC(+)_GTTTCCCGAAGGCGGCAGCGTCCGAGTTGCCCGGATGTAGTTGGTGGA	>WAC(+)_GTCCGAGTTGCCCGGATGTAGTTGGTGGA
chr8	23288117	23288118	R3HCC1	683	+	251	58	309	1	216	27	1	28	2	5	7	>R3HCC1(+)_CCCGGGTCTCTCTAGGGCGC	>R3HCC1(+)_CCCGGGTCTCTCTAGGGCGCTCGGGCGCGCTGGCCCCTGGGGACGCCG	>R3HCC1(+)_CTCGGGCGCGCTGGCCCCTGGGGACGCCG
chr12	50504999	50505000	DIP2B	47	+	222	81	303	5	179	26	2	28	4	1	9	>DIP2B(+)_GGGGGGCGGGGGCCGTCGCG	>DIP2B(+)_GGGGGGCGGGGGCCGTCGCGCTCACGTGACCTTTGCTCATGGCGGCGG	>DIP2B(+)_GCTCACGTGACCTTTGCTCATGGCGGCGG
chr3	37243270	37243271	GOLGA4	178	+	181	117	298	47	199	23	5	28	6	12	14	>GOLGA4(+)_TGAGCTCCACGTAGGCCGCG	>GOLGA4(+)_TGAGCTCCACGTAGGCCGCGCAAGCGCCCTTGGCGCACAGTTCACCTG	>GOLGA4(+)_GCAAGCGCCCTTGGCGCACAGTTCACCTG
chr1	161749801	161749802	DUSP12	73	+	240	56	296	35	231	27	1	28	7	25	11	>DUSP12(+)_TGGTAGGGCAGGAAGCCGCC	>DUSP12(+)_TGGTAGGGCAGGAAGCCGCCTTGTCTCTGGGCGCGGCCATGTTGGAGG	>DUSP12(+)_CTTGTCTCTGGGCGCGGCCATGTTGGAGG
chr5	32174313	32174314	GOLPH3	106	-	222	74	296	8	174	25	3	28	6	8	10	>GOLPH3(-)_CCACATCCTCCGGTGACGTC	>GOLPH3(-)_CCACATCCTCCGGTGACGTCAGCCGGGGCCGCCATATTGGAAAGGCGC	>GOLPH3(-)_CAGCCGGGGCCGCCATATTGGAAAGGCGC
chr1	162497858	162497859	UHMK1	89	+	206	88	294	17	233	28	0	28	7	5	2	>UHMK1(+)_ACTCGGGTGCACCACGGCTT	>UHMK1(+)_ACTCGGGTGCACCACGGCTTCCGGTGTCATGGCTGCTTGAAGTCCCGG	>UHMK1(+)_TCCGGTGTCATGGCTGCTTGAAGTCCCGG
chr16	14975159	14975160	PDXDC1	175	+	223	67	290	31	236	25	3	28	5	6	7	>PDXDC1(+)_CAGCGTGGAAGGAGCTGCGG	>PDXDC1(+)_CAGCGTGGAAGGAGCTGCGGGGCGCGGGAGGAGGAAGTAGAGCCCGGG	>PDXDC1(+)_GGGCGCGGGAGGAGGAAGTAGAGCCCGGG
chr15	59689305	59689306	BNIP2	39	-	213	76	289	12	171	25	3	28	2	9	6	>BNIP2(-)_TTATCACTTCCGCCGGGGCT	>BNIP2(-)_TTATCACTTCCGCCGGGGCTTCTCACTGTGTCCGGGTCAGCTGCTGCC	>BNIP2(-)_TTCTCACTGTGTCCGGGTCAGCTGCTGCC
chr15	80059675	80059676	ZFAND6	73	+	215	71	286	23	226	23	5	28	3	13	4	>ZFAND6(+)_GGTCGCGTCATAGGCCGAAC	>ZFAND6(+)_GGTCGCGTCATAGGCCGAACAACCAAACAGAAAAGTTTAATAAACAGC	>ZFAND6(+)_CAACCAAACAGAAAAGTTTAATAAACAGC
chr17	75261619	75261620	GGA3	19	-	236	50	286	10	207	19	9	28	8	1	0	>GGA3(-)_CAGGCCCCGCCCCGTCTCAG	>GGA3(-)_CAGGCCCCGCCCCGTCTCAGCTCGTGCAGACTCTCGCGAGTTTTGAAG	>GGA3(-)_GCTCGTGCAGACTCTCGCGAGTTTTGAAG
chr18	9475547	9475548	RALBP1	72	+	245	41	286	7	159	26	2	28	2	4	4	>RALBP1(+)_CGCCTCGTCCCGTTCCGTCC	>RALBP1(+)_CGCCTCGTCCCGTTCCGTCCCAATCATTGTAAACAGGCAGAGGCTGGG	>RALBP1(+)_CCAATCATTGTAAACAGGCAGAGGCTGGG
chr4	82429407	82429408	HNRNPDL	135	-	211	72	283	20	106	24	4	28	2	21	3	>HNRNPDL(-)_GCCCGGATCTCTTCCGCCGC	>HNRNPDL(-)_GCCCGGATCTCTTCCGCCGCCATTTTAAATCCAGCTCCATACAACGCT	>HNRNPDL(-)_CCATTTTAAATCCAGCTCCATACAACGCT
chrX	155458611	155458612	F8A3	49	-	254	27	281	4	115	28	0	28	5	9	6	>F8A3(-)_CCCGCCCGCCAGCTGCGGCG	>F8A3(-)_CCCGCCCGCCAGCTGCGGCGGCGCGTCGGGAAGTGCTTGGGGCGGCGA	>F8A3(-)_GGCGCGTCGGGAAGTGCTTGGGGCGGCGA
chr2	63588967	63588968	MDH1	62	+	172	105	277	22	195	24	4	28	0	7	8	>MDH1(+)_AGCCTTTTCTCGCTAACACC	>MDH1(+)_AGCCTTTTCTCGCTAACACCGCTCGCCCTCTCCGAGTCAGTTCCGCGG	>MDH1(+)_CGCTCGCCCTCTCCGAGTCAGTTCCGCGG
chr16	401944	401945	DECR2	124	+	188	88	276	13	136	25	3	28	7	8	6	>DECR2(+)_TCCTGGAGGCCGAGGCCGCT	>DECR2(+)_TCCTGGAGGCCGAGGCCGCTCCCGCCCGTTGTCCCCGCAGTCCCCGAC	>DECR2(+)_TCCCGCCCGTTGTCCCCGCAGTCCCCGAC
chr5	149345528	149345529	GRPEL2	67	+	168	105	273	10	170	23	5	28	7	0	4	>GRPEL2(+)_TCACTCGCAGCAAGTGCGCG	>GRPEL2(+)_TCACTCGCAGCAAGTGCGCGTGCGCTGCCTCTCAGCCCAAATTGGAAA	>GRPEL2(+)_GTGCGCTGCCTCTCAGCCCAAATTGGAAA
chr19	11374706	11374707	SWSAP1	17	+	244	19	263	9	227	28	0	28	2	2	5	>SWSAP1(+)_GCTACGCGGCGAATGGCGGA	>SWSAP1(+)_GCTACGCGGCGAATGGCGGAGACGCTGAGGCGGGTGCTAACCAGGGGC	>SWSAP1(+)_AGACGCTGAGGCGGGTGCTAACCAGGGGC
chr19	34172503	34172504	LSM14A	58	+	212	43	255	50	151	24	4	28	24	5	5	>LSM14A(+)_CCGCGCCGCGGCTTGAGGGC	>LSM14A(+)_CCGCGCCGCGGCTTGAGGGCGGGAGGCTGGGGGAGGGTAGCGGAGCCG	>LSM14A(+)_CGGGAGGCTGGGGGAGGGTAGCGGAGCCG
chr3	134485984	134485985	ANAPC13	138	-	180	75	255	0	219	24	4	28	0	0	0	>ANAPC13(-)_GCAGACACGTGATGCGGGGG	>ANAPC13(-)_GCAGACACGTGATGCGGGGGAGGGGGGGGGGGCGTGGCAGGAGCAAGC	>ANAPC13(-)_GAGGGGGGGGGGGCGTGGCAGGAGCAAGC
chr2	130356055	130356056	PTPN18	52	+	183	69	252	17	58	20	8	28	7	1	0	>PTPN18(+)_GGGGACTCAGTCACCGGCCT	>PTPN18(+)_GGGGACTCAGTCACCGGCCTCCGCCTCCCGCGGCGTCCACACTCGCCG	>PTPN18(+)_TCCGCCTCCCGCGGCGTCCACACTCGCCG
chr11	102347223	102347224	BIRC2	61	+	213	34	247	1	116	22	6	28	0	1	1	>BIRC2(+)_CTGGTCCTCGGCCGGGCGCG	>BIRC2(+)_CTGGTCCTCGGCCGGGCGCGCTGACGTCATCGTGCGTCAGAGTGAGCC	>BIRC2(+)_GCTGACGTCATCGTGCGTCAGAGTGAGCC
chr11	63974619	63974620	COX8A	58	+	172	69	241	45	264	25	3	28	19	16	14	>COX8A(+)_CTGCTTCCCCAGCTCCAGAA	>COX8A(+)_CTGCTTCCCCAGCTCCAGAACTTCCGGCCAGCGCAGCCATTTTGGCTT	>COX8A(+)_ACTTCCGGCCAGCGCAGCCATTTTGGCTT
chr1	84506203	84506204	GNG5	80	-	160	72	232	12	216	25	3	28	2	4	5	>GNG5(-)_ACCGAGGGTGGAGCCGCTGA	>GNG5(-)_ACCGAGGGTGGAGCCGCTGAGCACAGAACCGGAAACTTAGAGACAAAG	>GNG5(-)_AGCACAGAACCGGAAACTTAGAGACAAAG
chr1	26890273	26890274	GPN2	115	-	149	80	229	16	185	25	3	28	8	6	7	>GPN2(-)_CGTTTCCGACGCTGTCCGGA	>GPN2(-)_CGTTTCCGACGCTGTCCGGAAGTCGAGTTAGTCTAGTTAGTATCGGCC	>GPN2(-)_AAGTCGAGTTAGTCTAGTTAGTATCGGCC
chr9	133459993	133459994	CACFD1	16	+	195	26	221	14	224	26	2	28	3	8	0	>CACFD1(+)_CCGCCCCCTATGCTAATATG	>CACFD1(+)_CCGCCCCCTATGCTAATATGCTCCCTCTCCCACAAGGCAGCGCGCCGG	>CACFD1(+)_GCTCCCTCTCCCACAAGGCAGCGCGCCGG
chr17	4967816	4967817	SPAG7	104	-	148	62	210	40	202	22	6	28	5	11	5	>SPAG7(-)_CATTCCGCCCTTCCCTTTAA	>SPAG7(-)_CATTCCGCCCTTCCCTTTAAGACGCACCGCCCCCTCTCAGTCACTCCC	>SPAG7(-)_AGACGCACCGCCCCCTCTCAGTCACTCCC
chr17	81684020	81684021	HGS	37	+	147	60	207	9	120	26	2	28	1	5	5	>HGS(+)_GAAAAGGCGGAAGCGGAAGT	>HGS(+)_GAAAAGGCGGAAGCGGAAGTCGGGGGGCGCGCCAGCTCGTAGCAGGGG	>HGS(+)_TCGGGGGGCGCGCCAGCTCGTAGCAGGGG
chr11	615949	615950	IRF7	217	-	99	98	197	138	103	24	4	28	10	104	18	>IRF7(-)_CTGGCCACCATAAAAGCGCC	>IRF7(-)_CTGGCCACCATAAAAGCGCCGGCCCTCCGCTTCCCCGCGAGACGAAAC	>IRF7(-)_CGGCCCTCCGCTTCCCCGCGAGACGAAAC
chr4	147684162	147684163	PRMT9	134	-	127	68	195	13	168	25	3	28	1	1	0	>PRMT9(-)_GTGGGGTATGCGTCACGGTC	>PRMT9(-)_GTGGGGTATGCGTCACGGTCTGCGCCGCCCGCGGGGCCAGGACGGGGC	>PRMT9(-)_CTGCGCCGCCCGCGGGGCCAGGACGGGGC
chr12	29381147	29381148	ERGIC2	28	-	149	39	188	19	170	24	4	28	8	7	9	>ERGIC2(-)_TCCGGGTACGCGGGAGCCCC	>ERGIC2(-)_TCCGGGTACGCGGGAGCCCCGGCGACCCGGGCTTCTGTGAAACATGGC	>ERGIC2(-)_CGGCGACCCGGGCTTCTGTGAAACATGGC
chr17	63600894	63600895	TACO1	56	+	140	47	187	12	201	22	6	28	8	1	0	>TACO1(+)_CCCGGTAAAGGAAGTGTGCT	>TACO1(+)_CCCGGTAAAGGAAGTGTGCTACGCCATCAAGGGCCCCCAGTCCCGGGT	>TACO1(+)_TACGCCATCAAGGGCCCCCAGTCCCGGGT
chr19	12669393	12669394	WDR83OS	25	-	146	30	176	5	193	25	3	28	3	0	7	>WDR83OS(-)_AAGAGGCGTGATCTGGCCTT	>WDR83OS(-)_AAGAGGCGTGATCTGGCCTTCGACTCGCTATGTCCACTAACAATATGT	>WDR83OS(-)_TCGACTCGCTATGTCCACTAACAATATGT
chr1	156741087	156741088	MRPL24	25	-	109	31	140	0	160	25	3	28	5	3	1	>MRPL24(-)_GTCGACGGGCGTGGCGGGGG	>MRPL24(-)_GTCGACGGGCGTGGCGGGGGAGGGGACGCTGAGGGCCCATGTGCTGAA	>MRPL24(-)_GAGGGGACGCTGAGGGCCCATGTGCTGAA
chr11	62671672	62671673	UQCC3	166	+	94	37	131	9	82	23	5	28	2	5	0	>UQCC3(+)_GTTTCTGCTATAGGGCGCTC	>UQCC3(+)_GTTTCTGCTATAGGGCGCTCTAGCCTGCGCCAAGGGGTAGTGAGACCG	>UQCC3(+)_CTAGCCTGCGCCAAGGGGTAGTGAGACCG
chr6	31730255	31730256	DDAH2	115	-	79	49	128	1	80	23	5	28	1	0	0	>DDAH2(-)_ATGGGCGTGGCCCGAAGAAG	>DDAH2(-)_ATGGGCGTGGCCCGAAGAAGCCCCGCCCCGTCCCGCTTAGACAATGCC	>DDAH2(-)_GCCCCGCCCCGTCCCGCTTAGACAATGCC
chr14	90397031	90397032	CALM1	943	+	333	496	829	434	103	16	11	27	20	57	11	>CALM1(+)_CCATATATATATCGCGGGGC	>CALM1(+)_CCATATATATATCGCGGGGCGCAGACTCGCGCTCCGGCAGTGGTGCTG	>CALM1(+)_CGCAGACTCGCGCTCCGGCAGTGGTGCTG
chr15	99105079	99105080	SYNM	164	+	414	316	730	110	151	19	8	27	12	40	16	>SYNM(+)_CCGTCCGCTAAGTGCCTGGG	>SYNM(+)_CCGTCCGCTAAGTGCCTGGGCTCTCCCGCTCGCGTCCCAGTCTGCGGG	>SYNM(+)_GCTCTCCCGCTCGCGTCCCAGTCTGCGGG
chr6	43576184	43576185	POLH	2111	+	363	352	715	63	146	19	8	27	8	7	5	>POLH(+)_GTCAACGGCCCTTCGCAGCG	>POLH(+)_GTCAACGGCCCTTCGCAGCGGGCGCGCTGTCAGACCTCAGTCTGGCGG	>POLH(+)_GGGCGCGCTGTCAGACCTCAGTCTGGCGG
chr10	6202931	6202932	PFKFB3	1234	+	219	461	680	540	77	21	6	27	61	85	15	>PFKFB3(+)_CCGGACTCTTTAAAAGCCGG	>PFKFB3(+)_CCGGACTCTTTAAAAGCCGGCGGTGCGCGGGGCATCCCAGCCAAGCCG	>PFKFB3(+)_GCGGTGCGCGGGGCATCCCAGCCAAGCCG
chr7	98106892	98106893	LMTK2	90	+	584	81	665	1	188	25	2	27	3	7	8	>LMTK2(+)_GCGCTACGTCACATGACGCA	>LMTK2(+)_GCGCTACGTCACATGACGCAGCCCATCATGGCGGCGGGAGCGCGGCTT	>LMTK2(+)_AGCCCATCATGGCGGCGGGAGCGCGGCTT
chr2	238240037	238240038	HES6	216	-	272	378	650	312	128	12	15	27	20	30	0	>HES6(-)_TAAGCGGCTATAAAAGGGGC	>HES6(-)_TAAGCGGCTATAAAAGGGGCGGGACCGCGGCGGGCCGGAAGCCGCGAG	>HES6(-)_CGGGACCGCGGCGGGCCGGAAGCCGCGAG
chr2	30231536	30231537	LBH	492	+	250	385	635	486	102	15	12	27	24	41	2	>LBH(+)_CCCCTATAAATACGGCTTCC	>LBH(+)_CCCCTATAAATACGGCTTCCCGGGCTCTTTGTGGGGCTGAGTGCTCAG	>LBH(+)_CCGGGCTCTTTGTGGGGCTGAGTGCTCAG
chr16	57462667	57462668	POLR2C	236	+	478	152	630	10	146	21	6	27	4	9	9	>POLR2C(+)_AGCCGCGGAGGCCTCGCTGA	>POLR2C(+)_AGCCGCGGAGGCCTCGCTGACTGACTTCCGGTGTTGGCGGTGGCGCCG	>POLR2C(+)_ACTGACTTCCGGTGTTGGCGGTGGCGCCG
chr1	27155124	27155125	SLC9A1	1442	-	312	316	628	330	100	18	9	27	36	107	34	>SLC9A1(-)_GTGCCTATAAGTGACAGCGC	>SLC9A1(-)_GTGCCTATAAGTGACAGCGCCGGGCTCAGCTAGGCTTCAGTCTGCTGC	>SLC9A1(-)_CCGGGCTCAGCTAGGCTTCAGTCTGCTGC
chr6	27147105	27147106	HIST1H2AH	684	+	225	398	623	396	99	16	11	27	45	62	11	>HIST1H2AH(+)_ATAGTGTTTATAAAAGGCGC	>HIST1H2AH(+)_ATAGTGTTTATAAAAGGCGCTGCCTTTCCTCGTTGGCTACTTTCAGTA	>HIST1H2AH(+)_CTGCCTTTCCTCGTTGGCTACTTTCAGTA
chr15	89814851	89814852	ANPEP	170	-	234	347	581	147	122	18	9	27	17	37	10	>ANPEP(-)_TACTTCCCTTTAAAAAGACG	>ANPEP(-)_TACTTCCCTTTAAAAAGACGGGAAAGGAGGAGTCCAGTGCTGGAGGGG	>ANPEP(-)_GGGAAAGGAGGAGTCCAGTGCTGGAGGGG
chr6	31703299	31703300	ABHD16A	311	-	438	142	580	8	161	23	4	27	3	3	3	>ABHD16A(-)_AGGGCGGGGCCGGCAGGGGG	>ABHD16A(-)_AGGGCGGGGCCGGCAGGGGGACCTGCTGCTGGAAGAGCAGCGGCCCGA	>ABHD16A(-)_GACCTGCTGCTGGAAGAGCAGCGGCCCGA
chr16	56608583	56608584	MT2A	123	+	104	469	573	501	84	6	21	27	47	38	7	>MT2A(+)_CTTTCTAGCTATAAACACTG	>MT2A(+)_CTTTCTAGCTATAAACACTGCTTGCCGCGCTGCACTCCACCACGCCTC	>MT2A(+)_GCTTGCCGCGCTGCACTCCACCACGCCTC
chr2	10302903	10302904	HPCAL1	1386	+	447	126	573	16	147	25	2	27	5	4	6	>HPCAL1(+)_AGGTCCCGCCTTCGCGTCCC	>HPCAL1(+)_AGGTCCCGCCTTCGCGTCCCTTCCTTCCCGGAGCTGGCAGGCGGGCCG	>HPCAL1(+)_CTTCCTTCCCGGAGCTGGCAGGCGGGCCG
chr20	24992728	24992729	APMAP	88	-	451	119	570	25	238	22	5	27	10	8	10	>APMAP(-)_GGGGGAGGGCGGGCCTGGAG	>APMAP(-)_GGGGGAGGGCGGGCCTGGAGTCTGAGCCGGCGCCGCTCAGTGTGAGGT	>APMAP(-)_GTCTGAGCCGGCGCCGCTCAGTGTGAGGT
chr16	11976753	11976754	SNX29	602	+	316	244	560	37	174	24	3	27	5	19	11	>SNX29(+)_GCTCCTGTCTCCCGGCCTGT	>SNX29(+)_GCTCCTGTCTCCCGGCCTGTCTGGAGCTCGGCAGCCGCAGAAGCGGCA	>SNX29(+)_TCTGGAGCTCGGCAGCCGCAGAAGCGGCA
chr9	129835280	129835281	C9orf78	254	-	474	78	552	14	171	24	3	27	2	4	3	>C9orf78(-)_CAGACGGGGCAGGCGCTCTG	>C9orf78(-)_CAGACGGGGCAGGCGCTCTGACCGCTCTGCCGCGCGCCGGAAGCAGCC	>C9orf78(-)_GACCGCTCTGCCGCGCGCCGGAAGCAGCC
chr14	103715809	103715810	ZFYVE21	104	+	462	90	552	5	137	25	2	27	2	5	1	>ZFYVE21(+)_GGCGGGCGGTGCCCCGGGCT	>ZFYVE21(+)_GGCGGGCGGTGCCCCGGGCTGGGCGAGGGGCCGGGTGCGGGGCCGCTG	>ZFYVE21(+)_TGGGCGAGGGGCCGGGTGCGGGGCCGCTG
chr10	91633070	91633071	PPP1R3C	4514	-	251	300	551	159	112	19	8	27	26	36	8	>PPP1R3C(-)_TTGGGAGCAGATAAGCGGCC	>PPP1R3C(-)_TTGGGAGCAGATAAGCGGCCTCTAGGCGCCGGGCCCTCAGTCTCTCCC	>PPP1R3C(-)_CTCTAGGCGCCGGGCCCTCAGTCTCTCCC
chr3	122514915	122514916	KPNA1	59	-	457	88	545	13	205	23	4	27	5	24	16	>KPNA1(-)_CCCCCGCACGCAGGCGCACT	>KPNA1(-)_CCCCCGCACGCAGGCGCACTGCGAACGCCGGCTGAGCTGAGTCTCGCT	>KPNA1(-)_TGCGAACGCCGGCTGAGCTGAGTCTCGCT
chr5	177600150	177600151	B4GALT7	114	+	455	82	537	0	145	25	2	27	0	3	1	>B4GALT7(+)_CCTGGGCGGAGCGGGAGGCG	>B4GALT7(+)_CCTGGGCGGAGCGGGAGGCGGAGGCGCCGCGTAGGCCCGGGAGGCCGG	>B4GALT7(+)_GGAGGCGCCGCGTAGGCCCGGGAGGCCGG
chr18	2655727	2655728	SMCHD1	60	+	271	265	536	35	73	21	6	27	6	28	14	>SMCHD1(+)_CCGCCCGCCACCCGCCACCG	>SMCHD1(+)_CCGCCCGCCACCCGCCACCGCTCTTCCTCCTGCGCCACAGTCCCGGCG	>SMCHD1(+)_GCTCTTCCTCCTGCGCCACAGTCCCGGCG
chr4	173334352	173334353	HMGB2	385	-	152	368	520	135	120	13	14	27	22	11	11	>HMGB2(-)_GCAAAACAAGAGGCTGAGGA	>HMGB2(-)_GCAAAACAAGAGGCTGAGGATTGCGTTAGAGATAAACCAGTTCACGCC	>HMGB2(-)_ATTGCGTTAGAGATAAACCAGTTCACGCC
chr17	30824691	30824692	CRLF3	165	-	392	105	497	23	186	20	7	27	5	19	8	>CRLF3(-)_CGCGAGGCCGCGCCGGGCCG	>CRLF3(-)_CGCGAGGCCGCGCCGGGCCGCTTGGAGGCGCCCGGTGCAGTCGGGAAC	>CRLF3(-)_GCTTGGAGGCGCCCGGTGCAGTCGGGAAC
chr11	64251549	64251550	PLCB3	253	+	339	156	495	11	158	26	1	27	3	6	2	>PLCB3(+)_CTCTGGTCGGTCCGGGACAG	>PLCB3(+)_CTCTGGTCGGTCCGGGACAGACTGGCGGGCGGGCGGGCACTGACGCCG	>PLCB3(+)_GACTGGCGGGCGGGCGGGCACTGACGCCG
chr2	197516073	197516074	MOB4	80	+	352	140	492	72	198	25	2	27	18	29	14	>MOB4(+)_CTGCCGTCCCTACATCCGGG	>MOB4(+)_CTGCCGTCCCTACATCCGGGTACCGACTCCAGCCGCCTAGACGCTGGC	>MOB4(+)_GTACCGACTCCAGCCGCCTAGACGCTGGC
chr5	41904343	41904344	C5orf51	83	+	398	94	492	17	216	26	1	27	9	4	10	>C5orf51(+)_GGGATCAGGTGATTGCGGGC	>C5orf51(+)_GGGATCAGGTGATTGCGGGCCAACACGGTCACGTGACCGGGGCGCACC	>C5orf51(+)_CCAACACGGTCACGTGACCGGGGCGCACC
chr8	43056327	43056328	FNTA	63	+	320	169	489	26	193	26	1	27	6	9	20	>FNTA(+)_GAGGGGGAAGGGAGGGGCGG	>FNTA(+)_GAGGGGGAAGGGAGGGGCGGGGCCTCCGCCACCACCTCAGCTGCGGAC	>FNTA(+)_GGGCCTCCGCCACCACCTCAGCTGCGGAC
chr5	55994953	55994954	IL6ST	753	-	255	219	474	59	162	19	8	27	13	16	10	>IL6ST(-)_CTGGGGTGGCGCGCTACCTC	>IL6ST(-)_CTGGGGTGGCGCGCTACCTCTGCGGAGAAGGATCTGACAGTGTTCCGG	>IL6ST(-)_CTGCGGAGAAGGATCTGACAGTGTTCCGG
chr2	237967013	237967014	UBE2F	147	+	393	79	472	16	163	23	4	27	8	2	1	>UBE2F(+)_GCTGCCGCGGGCGAGAGCGG	>UBE2F(+)_GCTGCCGCGGGCGAGAGCGGCCGAGTCCCCGCCCCGCCACTTCCGGTC	>UBE2F(+)_GCCGAGTCCCCGCCCCGCCACTTCCGGTC
chr2	237967013	237967014	UBE2F-SCLY	147	+	393	79	472	16	163	23	4	27	8	2	1	>UBE2F-SCLY(+)_GCTGCCGCGGGCGAGAGCGG	>UBE2F-SCLY(+)_GCTGCCGCGGGCGAGAGCGGCCGAGTCCCCGCCCCGCCACTTCCGGTC	>UBE2F-SCLY(+)_GCCGAGTCCCCGCCCCGCCACTTCCGGTC
chr19	2328683	2328684	SPPL2B	136	+	320	146	466	2	193	21	6	27	4	3	5	>SPPL2B(+)_GGCCCGGGGTCTCGGGGCGT	>SPPL2B(+)_GGCCCGGGGTCTCGGGGCGTTGCTGGGAAACATCTGCCGTTGGTTGCG	>SPPL2B(+)_TTGCTGGGAAACATCTGCCGTTGGTTGCG
chr19	797451	797452	PTBP1	410	+	147	310	457	251	74	16	11	27	35	72	15	>PTBP1(+)_TGAGTCTATAACTCGGAGCC	>PTBP1(+)_TGAGTCTATAACTCGGAGCCGTTGGGTCGGTTCCTGCTATTCCGGCGC	>PTBP1(+)_CGTTGGGTCGGTTCCTGCTATTCCGGCGC
chr6	108074727	108074728	OSTM1	140	-	341	105	446	36	177	20	7	27	15	26	14	>OSTM1(-)_CCTCGTGACCCGGCTCTCGG	>OSTM1(-)_CCTCGTGACCCGGCTCTCGGCCTGCGCTCGCGGAAACCGGAAGCGGCG	>OSTM1(-)_GCCTGCGCTCGCGGAAACCGGAAGCGGCG
chr1	9129101	9129102	GPR157	71	-	374	71	445	10	111	27	0	27	1	8	2	>GPR157(-)_CGGGCGCCTGGACGCGAGCC	>GPR157(-)_CGGGCGCCTGGACGCGAGCCTAGGGCGCCTCGGTGCCCAGACGGCGGC	>GPR157(-)_CTAGGGCGCCTCGGTGCCCAGACGGCGGC
chr7	128830407	128830408	FLNC	563	+	153	288	441	201	89	13	14	27	28	18	5	>FLNC(+)_CGGGGGCTTCTTAAACCCCC	>FLNC(+)_CGGGGGCTTCTTAAACCCCCCGCCCCGGCCCAGCCCGCCCTTCCCGAG	>FLNC(+)_CCGCCCCGGCCCAGCCCGCCCTTCCCGAG
chr3	33798633	33798634	PDCD6IP	181	+	283	158	441	64	149	25	2	27	29	26	14	>PDCD6IP(+)_CCCGGAACGCAGGCGGAGCG	>PDCD6IP(+)_CCCGGAACGCAGGCGGAGCGCAAGTCTGTCAGCCAGTCAGTCCGCCAG	>PDCD6IP(+)_GCAAGTCTGTCAGCCAGTCAGTCCGCCAG
chr19	49642219	49642220	SCAF1	47	+	350	91	441	56	150	25	2	27	18	6	10	>SCAF1(+)_GAACCCCGCCCCAGCCCGCC	>SCAF1(+)_GAACCCCGCCCCAGCCCGCCCCGCCCCGCGCCGGGGCCGGAGCCGCAG	>SCAF1(+)_CCCGCCCCGCGCCGGGGCCGGAGCCGCAG
chr8	144291609	144291610	HSF1	69	+	321	118	439	10	134	24	3	27	13	8	7	>HSF1(+)_GAGGGCGGCAGCGGCGGCGG	>HSF1(+)_GAGGGCGGCAGCGGCGGCGGCGGGAGCGCGCCCGTTGCAAGATGGCGG	>HSF1(+)_GCGGGAGCGCGCCCGTTGCAAGATGGCGG
chr8	73976194	73976195	TMEM70	135	+	320	118	438	16	179	20	7	27	4	7	2	>TMEM70(+)_CCAGCTGCCAGTCAGGCGTC	>TMEM70(+)_CCAGCTGCCAGTCAGGCGTCCCGGGCTGGGCATGCGCCACTTGTGCGG	>TMEM70(+)_CCCGGGCTGGGCATGCGCCACTTGTGCGG
chr10	71773519	71773520	VSIR	1710	-	304	133	437	17	164	22	5	27	5	21	16	>VSIR(-)_GCGCTGGGGCCGCCCGCAGC	>VSIR(-)_GCGCTGGGGCCGCCCGCAGCGCTCACTCGCTCGCACTCAGTCGCGGGA	>VSIR(-)_CGCTCACTCGCTCGCACTCAGTCGCGGGA
chr15	44663661	44663662	SPG11	213	-	293	136	429	24	150	24	3	27	5	0	5	>SPG11(-)_CACGACGCAGTCAGGTTCCG	>SPG11(-)_CACGACGCAGTCAGGTTCCGGCGAAAGTGACCGGAAGTAACCGCCGGG	>SPG11(-)_GGCGAAAGTGACCGGAAGTAACCGCCGGG
chr3	69080355	69080356	UBA3	154	-	228	201	429	21	113	19	8	27	16	7	2	>UBA3(-)_CCCTGCCGCGCGTGGGCACC	>UBA3(-)_CCCTGCCGCGCGTGGGCACCTGGGAAGAGGCGGAGAACAATATGGCGG	>UBA3(-)_CTGGGAAGAGGCGGAGAACAATATGGCGG
chr12	110281246	110281247	ATP2A2	277	+	165	263	428	126	114	19	8	27	18	38	11	>ATP2A2(+)_GGCGGCGGCGAAAGGGGAGG	>ATP2A2(+)_GGCGGCGGCGAAAGGGGAGGCAGCGGCCGATAAATGCTATTAGAGCAG	>ATP2A2(+)_GCAGCGGCCGATAAATGCTATTAGAGCAG
chr2	27370626	27370627	SNX17	42	+	308	117	425	21	247	25	2	27	6	31	7	>SNX17(+)_CAGAACCGACGTCCCACCGC	>SNX17(+)_CAGAACCGACGTCCCACCGCCTTCCCACATCGGATCGCAGGGCTCCCA	>SNX17(+)_CCTTCCCACATCGGATCGCAGGGCTCCCA
chr11	124622874	124622875	TBRG1	81	+	324	100	424	17	183	24	3	27	13	4	1	>TBRG1(+)_CCGGGACGTAACTTCCGGGA	>TBRG1(+)_CCGGGACGTAACTTCCGGGAAGGGCTTACTTCCAAGACAGACACGGAA	>TBRG1(+)_AAGGGCTTACTTCCAAGACAGACACGGAA
chr7	43869506	43869507	MRPS24	50	-	307	115	422	3	189	22	5	27	7	8	7	>MRPS24(-)_CCCCACCCCTCAGCGCGCTG	>MRPS24(-)_CCCCACCCCTCAGCGCGCTGTGGTACGTCCCGCGCTCCGCTTGGCCCA	>MRPS24(-)_GTGGTACGTCCCGCGCTCCGCTTGGCCCA
chr17	44324800	44324801	SLC25A39	51	-	328	92	420	11	161	27	0	27	3	5	2	>SLC25A39(-)_CCCCTTGGCTGCTTTCGGCG	>SLC25A39(-)_CCCCTTGGCTGCTTTCGGCGTCGGCCTAGGTGCGCTGCGAGCGCGCGC	>SLC25A39(-)_GTCGGCCTAGGTGCGCTGCGAGCGCGCGC
chr20	297572	297573	ZCCHC3	282	+	287	128	415	8	229	26	1	27	1	6	13	>ZCCHC3(+)_TGGGCGCCCTTTGGCTGCGG	>ZCCHC3(+)_TGGGCGCCCTTTGGCTGCGGGAGCGAGTGGAGGATGCTGGGAAGGAGG	>ZCCHC3(+)_GGAGCGAGTGGAGGATGCTGGGAAGGAGG
chr2	3558332	3558333	RNASEH1	99	-	279	127	406	2	169	23	4	27	4	2	3	>RNASEH1(-)_AGACGTGCGTCATCTTCCCG	>RNASEH1(-)_AGACGTGCGTCATCTTCCCGCGCCGGTGACGGAAGTGCGGTGTTGAGC	>RNASEH1(-)_GCGCCGGTGACGGAAGTGCGGTGTTGAGC
chr7	17940485	17940486	SNX13	153	-	293	111	404	8	217	25	2	27	7	2	14	>SNX13(-)_GAACGCACGTTGCAGCGAGA	>SNX13(-)_GAACGCACGTTGCAGCGAGACGCGGACGTCGCTCTTCCAAGATGGCGG	>SNX13(-)_ACGCGGACGTCGCTCTTCCAAGATGGCGG
chr1	28643084	28643085	TAF12	192	-	286	111	397	7	152	25	2	27	2	3	4	>TAF12(-)_GCGTTTCCGGGTTGGAGGCG	>TAF12(-)_GCGTTTCCGGGTTGGAGGCGGGGAGCGGTGCCGGAAGTAGTCGGGGAG	>TAF12(-)_GGGGAGCGGTGCCGGAAGTAGTCGGGGAG
chr3	97822050	97822051	CRYBG3	114	+	259	137	396	29	166	21	6	27	7	4	3	>CRYBG3(+)_CGTGAGGAGCTGCCGCGCGA	>CRYBG3(+)_CGTGAGGAGCTGCCGCGCGAGGAGCGCGTCGCGTCCGCACTTCTCCTG	>CRYBG3(+)_AGGAGCGCGTCGCGTCCGCACTTCTCCTG
chr4	1289893	1289894	MAEA	222	+	258	133	391	17	300	26	1	27	10	7	5	>MAEA(+)_TCCCGGCGTGCAGCGCGCTC	>MAEA(+)_TCCCGGCGTGCAGCGCGCTCGCGCGTCCCCCGCCCGCTAATGTTTTGG	>MAEA(+)_CGCGCGTCCCCCGCCCGCTAATGTTTTGG
chr16	75647664	75647665	KARS	188	-	226	164	390	33	201	24	3	27	9	11	5	>KARS(-)_TCGCACCTTGACCTGGAAAT	>KARS(-)_TCGCACCTTGACCTGGAAATTAACGTACTATCCTCCTTACTTTTGGGT	>KARS(-)_TTAACGTACTATCCTCCTTACTTTTGGGT
chr6	27808172	27808173	HIST1H2AI	314	+	173	209	382	298	102	15	12	27	19	10	0	>HIST1H2AI(+)_TAGAGGCTATAAAATGTACG	>HIST1H2AI(+)_TAGAGGCTATAAAATGTACGTTTTTCTAGTTTCACTTCAGTCTTTCTT	>HIST1H2AI(+)_GTTTTTCTAGTTTCACTTCAGTCTTTCTT
chr19	42076184	42076185	ZNF574	123	+	282	100	382	36	147	24	3	27	11	23	7	>ZNF574(+)_GCTGAGGGTAGCTGGGGGCG	>ZNF574(+)_GCTGAGGGTAGCTGGGGGCGAGAGCGAGGCTACGGAGCAGGCGAGAGG	>ZNF574(+)_GAGAGCGAGGCTACGGAGCAGGCGAGAGG
chr22	23767938	23767939	CHCHD10	6	-	299	82	381	54	182	25	2	27	10	23	26	>CHCHD10(-)_CCCGCCTTTTTTGCGCCGGC	>CHCHD10(-)_CCCGCCTTTTTTGCGCCGGCTGTGACAAGCGCTGCGGCATTTGTCCCC	>CHCHD10(-)_CTGTGACAAGCGCTGCGGCATTTGTCCCC
chr1	226062720	226062721	H3F3A	876	+	129	250	379	83	82	18	9	27	13	20	15	>H3F3A(+)_CGTGTGTTGGGGGATAGCCT	>H3F3A(+)_CGTGTGTTGGGGGATAGCCTCGGTGTCAGCCATCTTTCAATTGTGTTC	>H3F3A(+)_TCGGTGTCAGCCATCTTTCAATTGTGTTC
chr16	15094243	15094244	RRN3	51	-	298	78	376	6	182	23	4	27	2	3	9	>RRN3(-)_GGAGCTGGGCATCCGGCCTG	>RRN3(-)_GGAGCTGGGCATCCGGCCTGAGGCGCAGCGGTCGCGTTAGTTCGGCCC	>RRN3(-)_GAGGCGCAGCGGTCGCGTTAGTTCGGCCC
chr3	141487083	141487084	RASA2	50	+	314	61	375	16	209	24	3	27	5	12	3	>RASA2(+)_CGCAGGCGGCAGGGCTGCGG	>RASA2(+)_CGCAGGCGGCAGGGCTGCGGCACGGGCCGGGCGGCACCATGGCGGCGG	>RASA2(+)_GCACGGGCCGGGCGGCACCATGGCGGCGG
chr7	102671662	102671663	POLR2J2	150	-	257	115	372	3	217	22	5	27	7	4	2	>POLR2J2(-)_GGGTTTGCCCCGCCGGAGTA	>POLR2J2(-)_GGGTTTGCCCCGCCGGAGTAATCCGGAAGAGGCCTCTTATTAGGGCTC	>POLR2J2(-)_AATCCGGAAGAGGCCTCTTATTAGGGCTC
chr4	78776349	78776350	BMP2K	265	+	214	156	370	24	154	21	6	27	15	8	3	>BMP2K(+)_GTCCCCGCCCTCCCCACCGC	>BMP2K(+)_GTCCCCGCCCTCCCCACCGCCCTCTGCGGGAGCCGGGCAGCTGCAGCG	>BMP2K(+)_CCCTCTGCGGGAGCCGGGCAGCTGCAGCG
chr16	57447358	57447359	CIAPIN1	98	-	240	128	368	23	93	23	4	27	13	7	4	>CIAPIN1(-)_GCGCAAGGCGTGGAGTCGAC	>CIAPIN1(-)_GCGCAAGGCGTGGAGTCGACGGCTGGAGAGAAGCCGGGAGCGAGCCCA	>CIAPIN1(-)_CGGCTGGAGAGAAGCCGGGAGCGAGCCCA
chr1	52698340	52698341	COA7	76	-	285	82	367	6	141	21	6	27	9	7	9	>COA7(-)_CCGCCCCGCCCCCTCCGCCG	>COA7(-)_CCGCCCCGCCCCCTCCGCCGGCTCACGTGACCGTCTTTGGGCCGGCGC	>COA7(-)_GGCTCACGTGACCGTCTTTGGGCCGGCGC
chr8	109334378	109334379	ENY2	121	+	244	122	366	37	223	24	3	27	2	10	10	>ENY2(+)_CTTTCTGTGTGCTTAGGTGC	>ENY2(+)_CTTTCTGTGTGCTTAGGTGCCCGAGCTACTGAGGGTCTAAGTCCGGGC	>ENY2(+)_CCCGAGCTACTGAGGGTCTAAGTCCGGGC
chr17	50397517	50397518	LRRC59	117	-	250	116	366	9	164	25	2	27	16	12	16	>LRRC59(-)_CCCATCTCAGTGGTCGCGGA	>LRRC59(-)_CCCATCTCAGTGGTCGCGGAAGGTGACGTGGACACGGAAGTGGTCGTC	>LRRC59(-)_AAGGTGACGTGGACACGGAAGTGGTCGTC
chr9	130579597	130579598	FUBP3	30	+	309	56	365	11	180	25	2	27	3	14	14	>FUBP3(+)_GAAGTAGGGCGACTTTCCTT	>FUBP3(+)_GAAGTAGGGCGACTTTCCTTTTCCGGCTACGGGTCCCCAAGCGGAGCG	>FUBP3(+)_TTTCCGGCTACGGGTCCCCAAGCGGAGCG
chr2	17753805	17753806	SMC6	609	-	324	40	364	3	196	25	2	27	0	3	2	>SMC6(-)_GAGCCCGAAGGGAGGGAGGG	>SMC6(-)_GAGCCCGAAGGGAGGGAGGGCGGGGCGCAGGCGCGGTTAGTACCGCGG	>SMC6(-)_GCGGGGCGCAGGCGCGGTTAGTACCGCGG
chr6	53065422	53065423	FBXO9	330	+	275	88	363	7	212	26	1	27	9	5	14	>FBXO9(+)_GGCAGCACCGGCACTGCGCA	>FBXO9(+)_GGCAGCACCGGCACTGCGCATGCTCGGCGCGTCGGCGCAGGTTTCCGC	>FBXO9(+)_ATGCTCGGCGCGTCGGCGCAGGTTTCCGC
chr2	28894680	28894681	WDR43	68	+	208	151	359	4	129	18	9	27	15	18	13	>WDR43(+)_GCGCCGGTGCGCCTGCGCAC	>WDR43(+)_GCGCCGGTGCGCCTGCGCACGGACGAACACGTGGCTGCAGCGGGGCCA	>WDR43(+)_CGGACGAACACGTGGCTGCAGCGGGGCCA
chr14	24141590	24141591	EMC9	214	-	207	146	353	64	146	18	9	27	12	16	7	>EMC9(-)_CAGGGAGCTGCAGTTTGGTC	>EMC9(-)_CAGGGAGCTGCAGTTTGGTCTGTCTCCCAGGCAGGCGCAGAGTCGCGG	>EMC9(-)_CTGTCTCCCAGGCAGGCGCAGAGTCGCGG
chr11	110296611	110296612	RDX	109	-	272	81	353	22	181	26	1	27	8	15	11	>RDX(-)_CAGCCCCGCCTTTTCCCGCG	>RDX(-)_CAGCCCCGCCTTTTCCCGCGGAGGCGCCGAGCGGCCATATTGCGGAGC	>RDX(-)_GGAGGCGCCGAGCGGCCATATTGCGGAGC
chr9	133376098	133376099	SURF4	213	-	222	123	345	46	137	18	9	27	15	5	2	>SURF4(-)_CGCGGCCCCTTTAAGGCTTG	>SURF4(-)_CGCGGCCCCTTTAAGGCTTGGCCTACGTGGCAGCCGCTGGAGCCGCAG	>SURF4(-)_GGCCTACGTGGCAGCCGCTGGAGCCGCAG
chr4	83284794	83284795	COQ2	66	-	301	43	344	2	247	26	1	27	1	3	5	>COQ2(-)_GCGGGTGCCACTGCGCATGC	>COQ2(-)_GCGGGTGCCACTGCGCATGCCTGCCGGGGAATGACGTCAATCCGAGCT	>COQ2(-)_CCTGCCGGGGAATGACGTCAATCCGAGCT
chr2	176269445	176269446	MTX2	33	+	242	100	342	9	212	24	3	27	9	7	1	>MTX2(+)_AAGCGCTCGAGTGCCGTTGT	>MTX2(+)_AAGCGCTCGAGTGCCGTTGTCGGCTGCGCCGGAAGTCCCTAGCCAGGC	>MTX2(+)_TCGGCTGCGCCGGAAGTCCCTAGCCAGGC
chr22	26590124	26590125	TPST2	49	-	232	102	334	1	196	21	6	27	3	1	4	>TPST2(-)_ACGTCGCCGCGGCCCCGCCC	>TPST2(-)_ACGTCGCCGCGGCCCCGCCCCCGCGCGGGCACCTCCCCCTTCCCCGGC	>TPST2(-)_CCCGCGCGGGCACCTCCCCCTTCCCCGGC
chr7	99408596	99408597	PDAP1	69	-	215	118	333	22	147	19	8	27	3	3	1	>PDAP1(-)_CAGGAGGAAGAAGTCGAGCC	>PDAP1(-)_CAGGAGGAAGAAGTCGAGCCCAAGCTATTTCCGGTTCCGGTGTCAGTT	>PDAP1(-)_CCAAGCTATTTCCGGTTCCGGTGTCAGTT
chr20	3204679	3204680	DDRGK1	80	-	270	63	333	5	210	26	1	27	3	7	8	>DDRGK1(-)_GTGGGCGGAGTCTAGATTGG	>DDRGK1(-)_GTGGGCGGAGTCTAGATTGGGAAATAGGGGCGGGGCCTATGAGATCCC	>DDRGK1(-)_GGAAATAGGGGCGGGGCCTATGAGATCCC
chr12	96907256	96907257	NEDD1	345	+	249	82	331	76	168	24	3	27	7	9	3	>NEDD1(+)_CGCCGAAGTTTAACAGTCCA	>NEDD1(+)_CGCCGAAGTTTAACAGTCCAGGCGGGAGCCGGAAGCCCAGCGCGGAGC	>NEDD1(+)_AGGCGGGAGCCGGAAGCCCAGCGCGGAGC
chr17	997118	997119	TIMM22	57	+	239	83	322	2	185	23	4	27	2	2	2	>TIMM22(+)_GTGACGCTTGTCGAATCTGC	>TIMM22(+)_GTGACGCTTGTCGAATCTGCTGCGGGGAGAAGGACGCGAGGGTTGCTT	>TIMM22(+)_CTGCGGGGAGAAGGACGCGAGGGTTGCTT
chr8	42541828	42541829	SMIM19	59	+	251	70	321	26	144	22	5	27	3	4	5	>SMIM19(+)_GACGCGGGGGTAAGGGGGGT	>SMIM19(+)_GACGCGGGGGTAAGGGGGGTGGCCGCCCGCCTGCCCTCGGTCCCGTGC	>SMIM19(+)_TGGCCGCCCGCCTGCCCTCGGTCCCGTGC
chr14	20455232	20455233	APEX1	64	+	191	129	320	33	167	24	3	27	13	14	8	>APEX1(+)_CCGCTACCCACGTGGGGGCT	>APEX1(+)_CCGCTACCCACGTGGGGGCTCAGCGTGCACCCTTCTTTGTGCTCGGGT	>APEX1(+)_TCAGCGTGCACCCTTCTTTGTGCTCGGGT
chr11	96390012	96390013	JRKL	200	+	205	113	318	37	210	21	6	27	5	4	4	>JRKL(+)_CCAGGCGGCGGGAGGGATCA	>JRKL(+)_CCAGGCGGCGGGAGGGATCATCTTCCGGGAGCGTGGCTAGGGGCGGAG	>JRKL(+)_ATCTTCCGGGAGCGTGGCTAGGGGCGGAG
chr9	34989729	34989730	DNAJB5	19	+	287	31	318	7	185	24	3	27	2	24	20	>DNAJB5(+)_GTGGGGGCGGGCTCCCGGTC	>DNAJB5(+)_GTGGGGGCGGGCTCCCGGTCCCGCTATCGGCGGCCGGCGGGCAGGCGA	>DNAJB5(+)_CCCGCTATCGGCGGCCGGCGGGCAGGCGA
chr8	97644183	97644184	MTDH	148	+	185	131	316	42	86	24	3	27	12	9	6	>MTDH(+)_CCCACGGTCGTCCCCGCGCG	>MTDH(+)_CCCACGGTCGTCCCCGCGCGCGGCGTGGATCGCGGCCCAAGCCGCCAT	>MTDH(+)_GCGGCGTGGATCGCGGCCCAAGCCGCCAT
chr12	56725298	56725299	NACA	76	-	183	128	311	110	215	24	3	27	18	9	5	>NACA(-)_TCCTTCTGCAACAGGCGTGG	>NACA(-)_TCCTTCTGCAACAGGCGTGGGTCACGCTCTCGCTCGGTCTTTCTGCCG	>NACA(-)_GGTCACGCTCTCGCTCGGTCTTTCTGCCG
chr10	133308845	133308846	TUBGCP2	23	-	274	36	310	5	235	26	1	27	2	8	13	>TUBGCP2(-)_GACGTCACGCTCACTTCCGC	>TUBGCP2(-)_GACGTCACGCTCACTTCCGCCGCCGTCGGGGGCTGCGCGGGGGCTGTG	>TUBGCP2(-)_CCGCCGTCGGGGGCTGCGCGGGGGCTGTG
chr8	101205645	101205646	ZNF706	27	-	238	70	308	22	125	20	7	27	3	23	9	>ZNF706(-)_CCGAGGAGAGCGGCGCGGCG	>ZNF706(-)_CCGAGGAGAGCGGCGCGGCGTGCGCGGGCACGAGGCGTAGTGGTCTCC	>ZNF706(-)_GTGCGCGGGCACGAGGCGTAGTGGTCTCC
chr22	41621305	41621306	XRCC6	85	+	245	63	308	14	229	25	2	27	7	6	8	>XRCC6(+)_GATTGGGACCGAGTACAGGG	>XRCC6(+)_GATTGGGACCGAGTACAGGGCCCGCGCATGCGTGGATTGTCGTCTTCT	>XRCC6(+)_GCCCGCGCATGCGTGGATTGTCGTCTTCT
chr4	75514472	75514473	THAP6	200	+	219	86	305	24	214	23	4	27	13	6	7	>THAP6(+)_ATTTCCGGTTCCCGGGGCTA	>THAP6(+)_ATTTCCGGTTCCCGGGGCTACGAGGCGGAAGCGAAGGCAGACGCAGTC	>THAP6(+)_ACGAGGCGGAAGCGAAGGCAGACGCAGTC
chr3	101574212	101574213	PCNP	83	+	210	94	304	17	168	26	1	27	9	17	23	>PCNP(+)_ACGTCCTTGGCGTGGCTGCA	>PCNP(+)_ACGTCCTTGGCGTGGCTGCAGGGGAGGCCGCGGCGGGGAAAATGGCGG	>PCNP(+)_AGGGGAGGCCGCGGCGGGGAAAATGGCGG
chr8	43140496	43140497	HGSNAT	110	+	243	61	304	8	100	23	4	27	7	4	0	>HGSNAT(+)_GCAGCGGGCAGGCAAGGGCG	>HGSNAT(+)_GCAGCGGGCAGGCAAGGGCGGCCGAGCGGGCGGCGGGCATGAGCGGGG	>HGSNAT(+)_GGCCGAGCGGGCGGCGGGCATGAGCGGGG
chr1	156728509	156728510	RRNAD1	134	+	265	37	302	9	219	24	3	27	5	7	5	>RRNAD1(+)_GCGCGCCGACGAAGCCCGGG	>RRNAD1(+)_GCGCGCCGACGAAGCCCGGGAAGGCAGGCGCGCGGGTTAGAACGCGCC	>RRNAD1(+)_GAAGGCAGGCGCGCGGGTTAGAACGCGCC
chr17	35142301	35142302	NLE1	16	-	199	98	297	10	197	26	1	27	6	5	9	>NLE1(-)_CCCGCCCGACCACGGAGACG	>NLE1(-)_CCCGCCCGACCACGGAGACGGCGCTCTGTCTGCCGGGCTCTTTCTCCT	>NLE1(-)_GGCGCTCTGTCTGCCGGGCTCTTTCTCCT
chr16	53434497	53434498	RBL2	19	+	243	52	295	2	219	27	0	27	3	6	7	>RBL2(+)_GCGGTGCGGGCGGCGGACGG	>RBL2(+)_GCGGTGCGGGCGGCGGACGGGCGGGCGCTTCGCCGTTTGAATGGCTGC	>RBL2(+)_GGCGGGCGCTTCGCCGTTTGAATGGCTGC
chr18	12991361	12991362	CEP192	42	+	253	41	294	9	206	27	0	27	8	3	2	>CEP192(+)_CTCCAGCCGGTGCGGGGGCC	>CEP192(+)_CTCCAGCCGGTGCGGGGGCCACGCGCACGCGCACTTGCAGTGCCCTGG	>CEP192(+)_CACGCGCACGCGCACTTGCAGTGCCCTGG
chr4	88007634	88007635	PKD2	202	+	207	86	293	68	127	25	2	27	24	1	4	>PKD2(+)_GAGGACGCGGGACCGCGGGG	>PKD2(+)_GAGGACGCGGGACCGCGGGGAGGTCGGGGGCGGGGAGCAGGCGGCGGC	>PKD2(+)_GAGGTCGGGGGCGGGGAGCAGGCGGCGGC
chr5	175478559	175478560	SFXN1	63	+	232	61	293	19	140	25	2	27	8	6	5	>SFXN1(+)_CGAGGACGCGCTCCGGGGAC	>SFXN1(+)_CGAGGACGCGCTCCGGGGACGCGCGAGGACGCCGTGGCGGGAGAAGCG	>SFXN1(+)_CGCGCGAGGACGCCGTGGCGGGAGAAGCG
chr12	54325167	54325168	COPZ1	65	+	225	67	292	38	190	27	0	27	10	11	11	>COPZ1(+)_TGCGGCTCCACGTCGGCACC	>COPZ1(+)_TGCGGCTCCACGTCGGCACCAGCTGCGGGGCAAGATGGAGGCGCTGAT	>COPZ1(+)_CAGCTGCGGGGCAAGATGGAGGCGCTGAT
chr11	62679072	62679073	UBXN1	50	-	238	54	292	15	252	24	3	27	8	6	9	>UBXN1(-)_CCCAAACAGATCCGGCACTT	>UBXN1(-)_CCCAAACAGATCCGGCACTTCCGCTTCCCCTCGGCTTTCTTCTCGTCG	>UBXN1(-)_TCCGCTTCCCCTCGGCTTTCTTCTCGTCG
chr11	69675346	69675347	LTO1	34	-	210	81	291	25	158	24	3	27	19	10	10	>LTO1(-)_TCTTACCCGGCCTGCCCCGC	>LTO1(-)_TCTTACCCGGCCTGCCCCGCGCCGCCGCTTCCGGAAGTGGGTCTCGTC	>LTO1(-)_CGCCGCCGCTTCCGGAAGTGGGTCTCGTC
chr14	23095127	23095128	ACIN1	66	-	193	98	291	6	240	23	4	27	5	5	2	>ACIN1(-)_AAATTACCGAAGATGCCCGA	>ACIN1(-)_AAATTACCGAAGATGCCCGAAGCCGTCGGGACGGACCCGAGTACCTCA	>ACIN1(-)_AAGCCGTCGGGACGGACCCGAGTACCTCA
chr2	190343619	190343620	INPP1	76	+	231	59	290	7	149	22	5	27	1	2	2	>INPP1(+)_GCGCTCCACTTGTGACGTCG	>INPP1(+)_GCGCTCCACTTGTGACGTCGCGGACGCCCGGCTCGGGCAGGCGTGGGG	>INPP1(+)_GCGGACGCCCGGCTCGGGCAGGCGTGGGG
chr1	151399563	151399564	PSMB4	89	+	230	59	289	39	177	17	10	27	27	9	3	>PSMB4(+)_GAAGGATCACTTCCGCTTCC	>PSMB4(+)_GAAGGATCACTTCCGCTTCCGTTGGCGCAAGCGCTTTCATTTTTTCTG	>PSMB4(+)_CGTTGGCGCAAGCGCTTTCATTTTTTCTG
chr14	92106563	92106564	ATXN3	44	-	255	33	288	20	260	22	5	27	4	5	4	>ATXN3(-)_GCTGGAGGGGGTGGTTCGGC	>ATXN3(-)_GCTGGAGGGGGTGGTTCGGCGTGGGGGCCGTTGGCTCCAGACAAATAA	>ATXN3(-)_CGTGGGGGCCGTTGGCTCCAGACAAATAA
chr4	2008971	2008972	NELFA	43	-	200	83	283	33	186	25	2	27	6	3	5	>NELFA(-)_CGTAGGTGTCTTCATAAGAT	>NELFA(-)_CGTAGGTGTCTTCATAAGATGCCGGGGCAGCGGCGCGCGCTTTCCCCC	>NELFA(-)_TGCCGGGGCAGCGGCGCGCGCTTTCCCCC
chr19	39125804	39125805	PAK4	65	+	193	89	282	18	236	21	6	27	2	14	7	>PAK4(+)_GGTGAGGGGGGAAAGCCCCG	>PAK4(+)_GGTGAGGGGGGAAAGCCCCGGATGTTCGTTGGGGATTCAACATGGCGG	>PAK4(+)_GGATGTTCGTTGGGGATTCAACATGGCGG
chr3	16265232	16265233	OXNAD1	65	+	215	64	279	10	194	24	3	27	9	6	4	>OXNAD1(+)_ACGTCTGGGACCGCGGAGTA	>OXNAD1(+)_ACGTCTGGGACCGCGGAGTATTCCAGGCGCCTGCAACTAAACGTGGCC	>OXNAD1(+)_ATTCCAGGCGCCTGCAACTAAACGTGGCC
chr1	207053251	207053252	PFKFB2	100	+	216	61	277	3	138	25	2	27	0	2	2	>PFKFB2(+)_ACCTACGCGCGAGGGGGCGG	>PFKFB2(+)_ACCTACGCGCGAGGGGGCGGGGCCAGACGGGCTCACATGATTTGCCGG	>PFKFB2(+)_GGGCCAGACGGGCTCACATGATTTGCCGG
chr17	28357666	28357667	TMEM199	56	+	238	38	276	6	194	26	1	27	1	9	11	>TMEM199(+)_GAAGTCCGGGTTGGGGTCAC	>TMEM199(+)_GAAGTCCGGGTTGGGGTCACCTGACCGGAGAGCCGGCTAGATATGGCG	>TMEM199(+)_CCTGACCGGAGAGCCGGCTAGATATGGCG
chr19	17075800	17075801	MYO9B	39	+	202	65	267	11	107	25	2	27	11	0	0	>MYO9B(+)_GGGGAGCGGCGGGCGCGGCG	>MYO9B(+)_GGGGAGCGGCGGGCGCGGCGGGGCGGAGCGGCTCGAGCAGCGGCGGGC	>MYO9B(+)_GGGGCGGAGCGGCTCGAGCAGCGGCGGGC
chr1	32072965	32072966	TMEM39B	121	+	208	52	260	10	240	25	2	27	6	2	1	>TMEM39B(+)_AGCGCGCGGCTGATACCCGG	>TMEM39B(+)_AGCGCGCGGCTGATACCCGGGACTGGGCTGCGGCGGTTAGTCCTCTCC	>TMEM39B(+)_GGACTGGGCTGCGGCGGTTAGTCCTCTCC
chr3	69052244	69052245	TMF1	111	-	209	51	260	2	199	22	5	27	1	3	1	>TMF1(-)_GCCCCCTTCGTCTCAGCTGT	>TMF1(-)_GCCCCCTTCGTCTCAGCTGTGCGGGAACGGCCGAGGGTAACATCCCGG	>TMF1(-)_TGCGGGAACGGCCGAGGGTAACATCCCGG
chr17	1179976	1179977	ABR	61	-	178	82	260	0	121	23	4	27	0	0	0	>ABR(-)_GAAGCCCCACCCCCGCCCCG	>ABR(-)_GAAGCCCCACCCCCGCCCCGCCCCCCGCGAAGTTGCTCATCGGTTCCG	>ABR(-)_GCCCCCCGCGAAGTTGCTCATCGGTTCCG
chr11	2400751	2400752	TSSC4	63	+	217	38	255	24	224	25	2	27	6	0	6	>TSSC4(+)_AGCACTCGGTTTCCCAGAGG	>TSSC4(+)_AGCACTCGGTTTCCCAGAGGGCTGAGCGCGCCGCACGGAGGTGCGGCG	>TSSC4(+)_GGCTGAGCGCGCCGCACGGAGGTGCGGCG
chr13	113759245	113759246	TMEM255B	27	+	223	32	255	5	234	26	1	27	0	5	1	>TMEM255B(+)_AGGGCGGCTCCTGGCGGCGG	>TMEM255B(+)_AGGGCGGCTCCTGGCGGCGGGACTGTGGCTGTGGCCCCGGGAGAGCCG	>TMEM255B(+)_GGACTGTGGCTGTGGCCCCGGGAGAGCCG
chr9	137223724	137223725	CYSRT1	83	+	211	33	244	1	225	26	1	27	3	4	5	>CYSRT1(+)_CCGGCGCCTGCGCAGTGGAC	>CYSRT1(+)_CCGGCGCCTGCGCAGTGGACTTCCGTCGCCGGCCTCTCAAGTTTTGGG	>CYSRT1(+)_CTTCCGTCGCCGGCCTCTCAAGTTTTGGG
chr5	142108778	142108779	NDFIP1	323	+	160	83	243	5	131	22	5	27	3	0	1	>NDFIP1(+)_CGGCGCAGCGCCGTCGTCGT	>NDFIP1(+)_CGGCGCAGCGCCGTCGTCGTAGTCCCCGCCTCTTCCCCAGGGGCCGCG	>NDFIP1(+)_TAGTCCCCGCCTCTTCCCCAGGGGCCGCG
chr5	61162438	61162439	SMIM15	41	-	181	58	239	4	170	21	6	27	3	2	2	>SMIM15(-)_GCGACTTCCGCCTTCCTGCT	>SMIM15(-)_GCGACTTCCGCCTTCCTGCTTCCGGTCTGGCGGTGAGTGGGGAGTGGG	>SMIM15(-)_TTCCGGTCTGGCGGTGAGTGGGGAGTGGG
chr7	6706946	6706947	ZNF12	176	-	167	68	235	14	242	24	3	27	7	5	8	>ZNF12(-)_TCTCTGTGTGCGTGTTCGCG	>ZNF12(-)_TCTCTGTGTGCGTGTTCGCGCATGCGCGCCGCGGCCGCAGTGCCCTCG	>ZNF12(-)_GCATGCGCGCCGCGGCCGCAGTGCCCTCG
chr9	128160313	128160314	C9orf16	43	+	181	48	229	12	143	24	3	27	0	8	5	>C9orf16(+)_GATCTGCTGCCGCGTTCTAC	>C9orf16(+)_GATCTGCTGCCGCGTTCTACCCTTCCGGCCCGTGTTCTATCCGCCGCC	>C9orf16(+)_CCCTTCCGGCCCGTGTTCTATCCGCCGCC
chr2	240560323	240560324	DUSP28	61	+	178	49	227	3	130	23	4	27	1	3	3	>DUSP28(+)_CGGGCCCGGCCAAGCCACGC	>DUSP28(+)_CGGGCCCGGCCAAGCCACGCCTCCGCGCCAGACGCCGCAGTAGAGCGG	>DUSP28(+)_CCTCCGCGCCAGACGCCGCAGTAGAGCGG
chr15	56733482	56733483	ZNF280D	46	-	220	6	226	8	199	27	0	27	1	9	6	>ZNF280D(-)_CTTTTCCTCCTCCTCTTTCT	>ZNF280D(-)_CTTTTCCTCCTCCTCTTTCTCCTCCTCCTCAGGGCTCCAGTCAGGCCG	>ZNF280D(-)_TCCTCCTCCTCAGGGCTCCAGTCAGGCCG
chr19	19643607	19643608	GMIP	238	-	176	47	223	15	202	24	3	27	1	1	2	>GMIP(-)_CGACGCGGAACCGAGGCGGC	>GMIP(-)_CGACGCGGAACCGAGGCGGCGGCGGCGGCTGCGGCGGCAGGAAATCGG	>GMIP(-)_CGGCGGCGGCTGCGGCGGCAGGAAATCGG
chr6	30326927	30326928	TRIM39	22	+	201	9	210	6	187	26	1	27	1	10	7	>TRIM39(+)_GAGTATTGTGTGTCGCGCCG	>TRIM39(+)_GAGTATTGTGTGTCGCGCCGCGGGGCGGGGGCGAGGGGAGGAGGAAGG	>TRIM39(+)_GCGGGGCGGGGGCGAGGGGAGGAGGAAGG
chr4	52862316	52862317	RASL11B	471	+	129	79	208	62	90	22	5	27	10	41	5	>RASL11B(+)_CGGCCGCGGAGAAAACAGCC	>RASL11B(+)_CGGCCGCGGAGAAAACAGCCGGCGCGCCGCGCGAGTGCAGTCTGGGTC	>RASL11B(+)_CGGCGCGCCGCGCGAGTGCAGTCTGGGTC
chr5	81301606	81301607	ZCCHC9	243	+	137	64	201	1	195	21	6	27	2	5	2	>ZCCHC9(+)_AGTGACGCGCTCTCGGGCAC	>ZCCHC9(+)_AGTGACGCGCTCTCGGGCACTATGTGCTTCCGGTCTCCAATACCGCAG	>ZCCHC9(+)_CTATGTGCTTCCGGTCTCCAATACCGCAG
chr1	244835336	244835337	COX20	132	+	157	42	199	10	124	22	5	27	4	4	1	>COX20(+)_GAGGCTCGTGCGTGTGAGCA	>COX20(+)_GAGGCTCGTGCGTGTGAGCACGCGCGCCGGAGACGGTTAGAAATGGCG	>COX20(+)_ACGCGCGCCGGAGACGGTTAGAAATGGCG
chr11	64317540	64317541	TRMT112	80	-	132	49	181	13	172	18	9	27	7	3	3	>TRMT112(-)_AGCGGAGGACGACCTTTTTC	>TRMT112(-)_AGCGGAGGACGACCTTTTTCCGGTTCCGGCCTGGCGAGAGTTTGTGCG	>TRMT112(-)_CCGGTTCCGGCCTGGCGAGAGTTTGTGCG
chr9	133336206	133336207	SURF6	21	-	121	51	172	3	171	23	4	27	0	3	1	>SURF6(-)_CGGCTCGGCGTTCGTTTGGC	>SURF6(-)_CGGCTCGGCGTTCGTTTGGCCGCGCCTGCCCGTGTGGTGGTTTCCGGC	>SURF6(-)_CCGCGCCTGCCCGTGTGGTGGTTTCCGGC
chr17	38799513	38799514	PIP4K2B	22	-	105	65	170	8	156	21	6	27	4	5	0	>PIP4K2B(-)_GGACGGGCGCGACCATGGCG	>PIP4K2B(-)_GGACGGGCGCGACCATGGCGCGGTGAGGGAGCGGGGGTGGGGATCGGT	>PIP4K2B(-)_GCGGTGAGGGAGCGGGGGTGGGGATCGGT
chr19	11505780	11505781	ZNF653	12	-	116	14	130	0	89	24	3	27	0	5	5	>ZNF653(-)_CAACGGGGGAGGCTGGTAAC	>ZNF653(-)_CAACGGGGGAGGCTGGTAACCAGGGTGGGGGGGATGGCGGAGCGGGCG	>ZNF653(-)_CCAGGGTGGGGGGGATGGCGGAGCGGGCG
chr1	182391789	182391790	GLUL	994	-	334	470	804	413	134	21	5	26	34	42	6	>GLUL(-)_GCCGCGGATAAAGGGTGCGG	>GLUL(-)_GCCGCGGATAAAGGGTGCGGGGCTGCTGGCGGCTCTGCAGAGTCGAGA	>GLUL(-)_GGGCTGCTGGCGGCTCTGCAGAGTCGAGA
chr1	46132628	46132629	PIK3R3	1470	-	158	628	786	389	103	7	19	26	56	19	8	>PIK3R3(-)_TCCGCGCCGTTAAAATGAAA	>PIK3R3(-)_TCCGCGCCGTTAAAATGAAACTCTAGTGGCTGGAGTCCGGGCAGAGCT	>PIK3R3(-)_ACTCTAGTGGCTGGAGTCCGGGCAGAGCT
chr10	71851248	71851249	PSAP	494	-	524	186	710	180	162	24	2	26	24	83	23	>PSAP(-)_GCAGATTTATATCTGCGGGG	>PSAP(-)_GCAGATTTATATCTGCGGGGGATCAGCTGACGCTCCGCATTGCAGACT	>PSAP(-)_GGATCAGCTGACGCTCCGCATTGCAGACT
chr2	224039290	224039291	SERPINE2	96	-	361	303	664	324	119	15	11	26	39	49	15	>SERPINE2(-)_GCGGCGCCGCCGATAAAGCC	>SERPINE2(-)_GCGGCGCCGCCGATAAAGCCCCCGCCGCCGCGGCAGCCAGCTTGCGCT	>SERPINE2(-)_CCCCGCCGCCGCGGCAGCCAGCTTGCGCT
chr9	38069226	38069227	SHB	972	-	362	274	636	134	131	18	8	26	32	15	7	>SHB(-)_CTGAGTGTCACACACGCGGC	>SHB(-)_CTGAGTGTCACACACGCGGCGGCTCGGGAGGCGGCGGCAGTGGCAGCG	>SHB(-)_CGGCTCGGGAGGCGGCGGCAGTGGCAGCG
chr9	89605013	89605014	GADD45G	15	+	341	287	628	202	81	18	8	26	24	131	18	>GADD45G(+)_ACCAGCCTATATAAGGGCGC	>GADD45G(+)_ACCAGCCTATATAAGGGCGCGCAGCGTAGTAGGGGCGCACTCGCTGGT	>GADD45G(+)_CGCAGCGTAGTAGGGGCGCACTCGCTGGT
chr14	69767144	69767145	SRSF5	617	+	299	304	603	217	124	18	8	26	33	41	13	>SRSF5(+)_CCTCCATTTTGTGGAGCGCC	>SRSF5(+)_CCTCCATTTTGTGGAGCGCCAGAGCTGCTAAGTGCGTCAGTTGTGGAG	>SRSF5(+)_CAGAGCTGCTAAGTGCGTCAGTTGTGGAG
chr3	184812170	184812171	VPS8	180	+	519	78	597	6	242	25	1	26	4	2	3	>VPS8(+)_CCGCAGTGGTAGGTAGTGCG	>VPS8(+)_CCGCAGTGGTAGGTAGTGCGCGTGCGTGAGGCTAGAGCAGTGGGTGCG	>VPS8(+)_GCGTGCGTGAGGCTAGAGCAGTGGGTGCG
chr14	103629210	103629211	KLC1	511	+	439	135	574	14	160	22	4	26	9	20	19	>KLC1(+)_GCGAGGCGGGGCGCCGGGGG	>KLC1(+)_GCGAGGCGGGGCGCCGGGGGGAGCAACACTGAGACGCCATTTTCGGCG	>KLC1(+)_GGAGCAACACTGAGACGCCATTTTCGGCG
chr15	72474329	72474330	ARIH1	382	+	325	243	568	32	143	20	6	26	21	4	10	>ARIH1(+)_GCAGCGCGACGCGGTGACGC	>ARIH1(+)_GCAGCGCGACGCGGTGACGCACGCCCCTTTGTTGGCTCAGTAGCGATA	>ARIH1(+)_CACGCCCCTTTGTTGGCTCAGTAGCGATA
chr14	64540740	64540741	HSPA2	352	+	190	371	561	406	53	16	10	26	63	105	16	>HSPA2(+)_AGGCGGCTATAAGAACCGGG	>HSPA2(+)_AGGCGGCTATAAGAACCGGGAACTGGGCGCGGGGAGCTGAGTTGCTGG	>HSPA2(+)_GAACTGGGCGCGGGGAGCTGAGTTGCTGG
chr12	27710839	27710840	MRPS35	39	+	405	149	554	27	224	22	4	26	11	17	11	>MRPS35(+)_CTGAACGCCGCTTGTCCCCT	>MRPS35(+)_CTGAACGCCGCTTGTCCCCTCCGGCTTGCCGTCCTCGCAGCCATGGCG	>MRPS35(+)_TCCGGCTTGCCGTCCTCGCAGCCATGGCG
chr1	149886681	149886682	HIST2H2BE	1056	-	129	389	518	508	107	15	11	26	48	29	6	>HIST2H2BE(-)_AAGGTGGTTATAAAAGAATC	>HIST2H2BE(-)_AAGGTGGTTATAAAAGAATCAGGCCCGCCCATTCTCTTACTTCTTTTC	>HIST2H2BE(-)_CAGGCCCGCCCATTCTCTTACTTCTTTTC
chr6	128520572	128520573	PTPRK	126	-	281	222	503	80	186	16	10	26	6	32	10	>PTPRK(-)_AAGTAACTCTTGACTAACAG	>PTPRK(-)_AAGTAACTCTTGACTAACAGGAGCAGCCTCCGCCGAGCATGGAGAGCT	>PTPRK(-)_GGAGCAGCCTCCGCCGAGCATGGAGAGCT
chr3	38649686	38649687	SCN5A	329	-	419	81	500	5	156	24	2	26	5	3	2	>SCN5A(-)_CCGAGCCCGCGCCGCCTGCC	>SCN5A(-)_CCGAGCCCGCGCCGCCTGCCCAGCCCGGGAGCCCGAACAGAGCCGCGG	>SCN5A(-)_CCAGCCCGGGAGCCCGAACAGAGCCGCGG
chr10	97498383	97498384	MMS19	53	-	355	144	499	35	141	18	8	26	14	7	5	>MMS19(-)_ACCGCCCATATCCCCTCCCA	>MMS19(-)_ACCGCCCATATCCCCTCCCACGGTCTCTAGTTCGCGTTATGGCCGCTG	>MMS19(-)_ACGGTCTCTAGTTCGCGTTATGGCCGCTG
chr9	93134250	93134251	NINJ1	703	-	314	182	496	32	149	22	4	26	9	17	11	>NINJ1(-)_GCGCAGCTGGAGCCTGCGGC	>NINJ1(-)_GCGCAGCTGGAGCCTGCGGCTGAGGCTCGGGCGCGCTCAGGCCCGGAT	>NINJ1(-)_CTGAGGCTCGGGCGCGCTCAGGCCCGGAT
chr1	1615515	1615516	MIB2	208	+	439	46	485	2	147	22	4	26	0	17	13	>MIB2(+)_CGGGGGCGGGCCCTGGGCTC	>MIB2(+)_CGGGGGCGGGCCCTGGGCTCCCGCCCTTCGGGTCCCACAGTTTCCAGC	>MIB2(+)_CCCGCCCTTCGGGTCCCACAGTTTCCAGC
chr3	128650815	128650816	RPN1	114	-	290	194	484	47	121	22	4	26	15	25	24	>RPN1(-)_GGCGGGCTACCGCGCCCGGG	>RPN1(-)_GGCGGGCTACCGCGCCCGGGCCCTACCCGCCCTGGCGCACTGCTCTTC	>RPN1(-)_GCCCTACCCGCCCTGGCGCACTGCTCTTC
chr14	24429865	24429866	CBLN3	318	-	381	99	480	43	122	22	4	26	20	3	2	>CBLN3(-)_CGGCTGCGCGCCCTCCTCCC	>CBLN3(-)_CGGCTGCGCGCCCTCCTCCCAACCCCGCCGCCGCGCCCAGAGGCCCCG	>CBLN3(-)_CAACCCCGCCGCCGCGCCCAGAGGCCCCG
chr5	132556978	132556979	RAD50	76	+	305	167	472	16	163	22	4	26	10	5	3	>RAD50(+)_GGAGAGCGGCGTGGACGCGT	>RAD50(+)_GGAGAGCGGCGTGGACGCGTGCGGGCCTAGAGGCCCACGTGATCCGCA	>RAD50(+)_TGCGGGCCTAGAGGCCCACGTGATCCGCA
chr22	43923804	43923805	PNPLA3	1327	+	344	117	461	48	158	25	1	26	9	12	7	>PNPLA3(+)_GCGCTGGGAATGCCCTGGCC	>PNPLA3(+)_GCGCTGGGAATGCCCTGGCCGAGACACTGAGGCAGGGTAGAGAGCGCT	>PNPLA3(+)_CGAGACACTGAGGCAGGGTAGAGAGCGCT
chr8	19817425	19817426	INTS10	281	+	377	71	448	8	170	25	1	26	6	7	3	>INTS10(+)_TCCACTCTGCCAGCCTCCGT	>INTS10(+)_TCCACTCTGCCAGCCTCCGTGCGCCTCCAGACATGCGCAGTAGCCTCC	>INTS10(+)_TGCGCCTCCAGACATGCGCAGTAGCCTCC
chr20	47501912	47501913	NCOA3	193	+	271	167	438	54	107	21	5	26	17	18	6	>NCOA3(+)_TGCGGCGACTTTAGCTGCTG	>NCOA3(+)_TGCGGCGACTTTAGCTGCTGCTGTCTCAGCCGCTCCACAGCGACGGCA	>NCOA3(+)_GCTGTCTCAGCCGCTCCACAGCGACGGCA
chr4	109433837	109433838	SEC24B	44	+	279	156	435	3	213	25	1	26	0	3	2	>SEC24B(+)_CTCCGGCCCCGCCTTCCCTT	>SEC24B(+)_CTCCGGCCCCGCCTTCCCTTCCCTCCGCCCACCTCCCTGAAGCGGAGC	>SEC24B(+)_TCCCTCCGCCCACCTCCCTGAAGCGGAGC
chr3	9769937	9769938	CAMK1	295	-	333	100	433	24	189	22	4	26	5	6	4	>CAMK1(-)_GAGAGAGCCGCCGAGCCGAG	>CAMK1(-)_GAGAGAGCCGCCGAGCCGAGCCGAGCCCCAGCTCCAGCAAGAGCGCGG	>CAMK1(-)_GCCGAGCCCCAGCTCCAGCAAGAGCGCGG
chr7	134646853	134646854	BPGM	231	+	186	246	432	344	131	22	4	26	41	92	31	>BPGM(+)_TCAGGGGCTAGAAAAGAGCG	>BPGM(+)_TCAGGGGCTAGAAAAGAGCGTCGATGCCGGCGGCAGTGATGAGTCCTA	>BPGM(+)_GTCGATGCCGGCGGCAGTGATGAGTCCTA
chr13	75537815	75537816	COMMD6	131	-	263	166	429	13	110	20	6	26	3	17	4	>COMMD6(-)_GTCTGGGGGCGTTCTCTCGA	>COMMD6(-)_GTCTGGGGGCGTTCTCTCGAGTCCGGGCCGCAAGTCCCAGACGCTGCC	>COMMD6(-)_AGTCCGGGCCGCAAGTCCCAGACGCTGCC
chr1	43946965	43946966	IPO13	28	+	291	138	429	13	130	24	2	26	5	20	9	>IPO13(+)_CTGCCCCGTCCCGGCCGGCC	>IPO13(+)_CTGCCCCGTCCCGGCCGGCCTGGCTTGTCTTGTCAGTCACTGGGGCGG	>IPO13(+)_CTGGCTTGTCTTGTCAGTCACTGGGGCGG
chr14	73950321	73950322	COQ6	28	+	334	93	427	7	204	26	0	26	5	15	12	>COQ6(+)_CGTAGGTGGGCCTGCGGGAG	>COQ6(+)_CGTAGGTGGGCCTGCGGGAGTTCTGAGTGCGACGGCGCAGGTCTGCAC	>COQ6(+)_GTTCTGAGTGCGACGGCGCAGGTCTGCAC
chr1	37808181	37808182	YRDC	95	-	255	170	425	19	148	20	6	26	10	3	6	>YRDC(-)_GCTGGGAGCGTCACTTCCTC	>YRDC(-)_GCTGGGAGCGTCACTTCCTCCCGGAAGCGGGCCTGGGCGGATGTCTCC	>YRDC(-)_CCCGGAAGCGGGCCTGGGCGGATGTCTCC
chr12	48865869	48865870	RND1	706	-	244	180	424	70	133	21	5	26	12	21	7	>RND1(-)_CCAGAAAAATAAAAGGCGGC	>RND1(-)_CCAGAAAAATAAAAGGCGGCTGTGCCGGCCTCCTCCTCAGTTGGAGGG	>RND1(-)_CTGTGCCGGCCTCCTCCTCAGTTGGAGGG
chr7	73719668	73719669	STX1A	35	-	345	73	418	9	196	19	7	26	6	2	2	>STX1A(-)_TGCGCAGCCGCGGGGCGGCC	>STX1A(-)_TGCGCAGCCGCGGGGCGGCCGTCGCGCATGCGGGGCTCACACGGCTGC	>STX1A(-)_CGTCGCGCATGCGGGGCTCACACGGCTGC
chr8	38382990	38382991	NSD3	332	-	326	88	414	36	146	25	1	26	7	5	11	>NSD3(-)_CTCCCGGTTACCCACAAGCC	>NSD3(-)_CTCCCGGTTACCCACAAGCCTCCGGGCCGCAGCAGAGCAGGAAGAGGC	>NSD3(-)_CTCCGGGCCGCAGCAGAGCAGGAAGAGGC
chr14	91510286	91510287	PPP4R3A	179	-	273	139	412	13	206	17	9	26	11	30	8	>PPP4R3A(-)_CCTGGGTGGCCCCGCGCGCC	>PPP4R3A(-)_CCTGGGTGGCCCCGCGCGCCGCTTTTGAGGGGCGAACCAAGATGGCGG	>PPP4R3A(-)_CGCTTTTGAGGGGCGAACCAAGATGGCGG
chr14	103385388	103385389	MARK3	53	+	361	48	409	5	170	23	3	26	0	1	3	>MARK3(+)_GTGGCGGCCTGTCGTCACTT	>MARK3(+)_GTGGCGGCCTGTCGTCACTTCCGGCAGCCGGAGGCAGCAGAGGAAGCC	>MARK3(+)_TCCGGCAGCCGGAGGCAGCAGAGGAAGCC
chr10	79445623	79445624	ZCCHC24	1355	-	143	263	406	140	93	15	11	26	22	0	0	>ZCCHC24(-)_CGCTGCCTCCTTCCACCGCC	>ZCCHC24(-)_CGCTGCCTCCTTCCACCGCCTGCGCGCGCCGGGGCCGCAGTCGGGGGG	>ZCCHC24(-)_CTGCGCGCGCCGGGGCCGCAGTCGGGGGG
chr12	106358110	106358111	POLR3B	251	+	274	131	405	2	224	22	4	26	3	7	3	>POLR3B(+)_CGCATGCCCAGAGCGTCGCG	>POLR3B(+)_CGCATGCCCAGAGCGTCGCGCTTGCGAGTCTTTTTTCCAGAGCCGGCC	>POLR3B(+)_GCTTGCGAGTCTTTTTTCCAGAGCCGGCC
chr19	4343593	4343594	MPND	82	+	297	107	404	87	196	22	4	26	14	91	18	>MPND(+)_GCCGGAGTCTAGAGCTCCGG	>MPND(+)_GCCGGAGTCTAGAGCTCCGGGCGCGGGGAGGCGCGGCCATGGCAGGTA	>MPND(+)_GGCGCGGGGAGGCGCGGCCATGGCAGGTA
chr7	65006686	65006687	ERV3-1	155	-	329	75	404	34	193	25	1	26	14	12	9	>ERV3-1(-)_GAGCAGACAGGACGGCTTCC	>ERV3-1(-)_GAGCAGACAGGACGGCTTCCGGGTTTGGTGGGGCCTTTGTCTCTGGCG	>ERV3-1(-)_CGGGTTTGGTGGGGCCTTTGTCTCTGGCG
chr16	53872	53873	SNRNP25	291	+	322	81	403	10	122	26	0	26	6	1	4	>SNRNP25(+)_CTGCGCGTGCGCGCTTGGCC	>SNRNP25(+)_CTGCGCGTGCGCGCTTGGCCTCCCTAGTGCGGGCTGGCAGTGCGGGCA	>SNRNP25(+)_CTCCCTAGTGCGGGCTGGCAGTGCGGGCA
chr12	106955908	106955909	TMEM263	131	+	218	181	399	97	154	19	7	26	13	17	11	>TMEM263(+)_CCGCAGCCAGAGGCCTCCGC	>TMEM263(+)_CCGCAGCCAGAGGCCTCCGCCTCCACCACCGCCGCCACAGTCTTCCAG	>TMEM263(+)_CCTCCACCACCGCCGCCACAGTCTTCCAG
chr14	39175253	39175254	PNN	153	+	247	150	397	52	149	20	6	26	26	14	10	>PNN(+)_CTCGGCGGCGCGGCATAGCC	>PNN(+)_CTCGGCGGCGCGGCATAGCCCGGCTCGGCCTGTAAAGCAGTCTCAAGC	>PNN(+)_CCGGCTCGGCCTGTAAAGCAGTCTCAAGC
chr5	138753447	138753448	CTNNA1	57	+	269	127	396	34	162	21	5	26	2	19	6	>CTNNA1(+)_GGGGCGGCCCATTTCCTCCT	>CTNNA1(+)_GGGGCGGCCCATTTCCTCCTCCTAGCCGGACTGGAGGGAGACAAAGCA	>CTNNA1(+)_TCCTAGCCGGACTGGAGGGAGACAAAGCA
chr17	7583851	7583852	MPDU1	186	+	304	91	395	46	211	23	3	26	2	16	5	>MPDU1(+)_CGAAAGTCAATGGCGGTCTG	>MPDU1(+)_CGAAAGTCAATGGCGGTCTGGAGAGACTGGCGGAAGCTAGCTTTGCAA	>MPDU1(+)_GGAGAGACTGGCGGAAGCTAGCTTTGCAA
chr9	132354985	132354986	SETX	73	-	294	97	391	98	204	23	3	26	16	23	6	>SETX(-)_CGGCAACAGCTGGTTGGTAG	>SETX(-)_CGGCAACAGCTGGTTGGTAGCTGCGGCTGCGGGCCCGCACTTCCGCTG	>SETX(-)_GCTGCGGCTGCGGGCCCGCACTTCCGCTG
chr4	87007270	87007271	AFF1	73	+	246	145	391	21	158	21	5	26	7	8	5	>AFF1(+)_GGGGCTGCGCCGAGGACGCC	>AFF1(+)_GGGGCTGCGCCGAGGACGCCCGGGGCTCGAGAGCAGGTAGTCCCGTAA	>AFF1(+)_CCGGGGCTCGAGAGCAGGTAGTCCCGTAA
chr12	43806315	43806316	TWF1	61	-	335	55	390	13	211	23	3	26	4	5	0	>TWF1(-)_CGGGCGGATGACGCGCCGGG	>TWF1(-)_CGGGCGGATGACGCGCCGGGGCCGGCGGAGGAGCAGCCACTTCCTGGG	>TWF1(-)_GGCCGGCGGAGGAGCAGCCACTTCCTGGG
chr5	141923838	141923839	DELE1	36	+	347	42	389	17	229	25	1	26	1	8	2	>DELE1(+)_CCGGGCTCCCTTCTAATTGG	>DELE1(+)_CCGGGCTCCCTTCTAATTGGCCAGCTCAGAGCTTCCTCGGGTACTCGG	>DELE1(+)_GCCAGCTCAGAGCTTCCTCGGGTACTCGG
chr22	46250238	46250239	CDPF1	93	-	218	166	384	37	142	23	3	26	10	5	11	>CDPF1(-)_GAGCCGTGGGACGAGGGCGG	>CDPF1(-)_GAGCCGTGGGACGAGGGCGGCGGTGAGTTCGAGGTGGCAGAGTGACTG	>CDPF1(-)_GCGGTGAGTTCGAGGTGGCAGAGTGACTG
chr15	40039146	40039147	SRP14	127	-	246	138	384	7	167	18	8	26	2	7	9	>SRP14(-)_GCCTAGGCCGAACTTCCGGC	>SRP14(-)_GCCTAGGCCGAACTTCCGGCTCTCACTGCTAGGGGCTTAAGCGGAGGG	>SRP14(-)_CTCTCACTGCTAGGGGCTTAAGCGGAGGG
chr3	172711064	172711065	NCEH1	46	-	285	93	378	147	133	18	8	26	17	69	10	>NCEH1(-)_CTGGGCTTATAAGAAACGCG	>NCEH1(-)_CTGGGCTTATAAGAAACGCGTGAATGAGCAGCTGCCGCGGGCAGAAAG	>NCEH1(-)_GTGAATGAGCAGCTGCCGCGGGCAGAAAG
chr1	155934385	155934386	KHDC4	331	-	268	106	374	50	173	25	1	26	7	19	13	>KHDC4(-)_CGAGAGGTGGTAGTCGGATA	>KHDC4(-)_CGAGAGGTGGTAGTCGGATAGTTGGCGGGTGGTTGAGTAGAAGCGGTC	>KHDC4(-)_AGTTGGCGGGTGGTTGAGTAGAAGCGGTC
chr1	40040751	40040752	CAP1	75	+	236	135	371	18	149	23	3	26	6	8	2	>CAP1(+)_GAAGTGGGTCGCGCGGAGAT	>CAP1(+)_GAAGTGGGTCGCGCGGAGATTGCTGGGCGGTTCTTGCCGGAAGCGGAG	>CAP1(+)_TTGCTGGGCGGTTCTTGCCGGAAGCGGAG
chr2	88627463	88627464	EIF2AK3	155	-	314	56	370	25	162	23	3	26	2	10	7	>EIF2AK3(-)_ACGCGCGGAAAGTTTGCTCA	>EIF2AK3(-)_ACGCGCGGAAAGTTTGCTCAATGGGCGATGTCCGAGATAGGCTGTCAC	>EIF2AK3(-)_AATGGGCGATGTCCGAGATAGGCTGTCAC
chr15	41972556	41972557	EHD4	100	-	190	176	366	76	137	18	8	26	21	11	8	>EHD4(-)_CCCTCCTCGGGCGGCGGCCA	>EHD4(-)_CCCTCCTCGGGCGGCGGCCAGCGCGGCCGGGGCGGCTCAGTGCGAGCC	>EHD4(-)_AGCGCGGCCGGGGCGGCTCAGTGCGAGCC
chr8	86508654	86508655	RMDN1	103	-	218	148	366	40	169	22	4	26	12	8	12	>RMDN1(-)_TGAATCTCCTTTAGCCCCGC	>RMDN1(-)_TGAATCTCCTTTAGCCCCGCCCGCCTCCGTAGCTGCCTGAAGTAGTGC	>RMDN1(-)_CCCGCCTCCGTAGCTGCCTGAAGTAGTGC
chr11	111766367	111766368	PPP2R1B	113	-	248	116	364	8	210	23	3	26	8	25	30	>PPP2R1B(-)_GGCGCGGGGCGGGAGGCGGT	>PPP2R1B(-)_GGCGCGGGGCGGGAGGCGGTGACCAGCAGCAGGAGGAGAAAGAACATG	>PPP2R1B(-)_TGACCAGCAGCAGGAGGAGAAAGAACATG
chr17	80220332	80220333	SGSH	51	-	249	112	361	52	110	22	4	26	9	14	6	>SGSH(-)_AGCGGGAGACCAGAGAGCCG	>SGSH(-)_AGCGGGAGACCAGAGAGCCGGAGCCGGATCCCGATCCCGAGTCCGAGC	>SGSH(-)_GGAGCCGGATCCCGATCCCGAGTCCGAGC
chr4	176319971	176319972	SPCS3	208	+	283	77	360	14	90	18	8	26	6	2	3	>SPCS3(+)_ACCGGAAAGGAGGCGGGGCT	>SPCS3(+)_ACCGGAAAGGAGGCGGGGCTGCGGCGGCGCGCGCTCCCGGAACGCGCG	>SPCS3(+)_TGCGGCGGCGCGCGCTCCCGGAACGCGCG
chr19	3185929	3185930	NCLN	318	+	300	58	358	21	209	25	1	26	3	0	2	>NCLN(+)_CCTCAGGGCGAGTGCGGGCT	>NCLN(+)_CCTCAGGGCGAGTGCGGGCTGCCCCGCGCGGCGCCCGCAGGACCCCGG	>NCLN(+)_TGCCCCGCGCGGCGCCCGCAGGACCCCGG
chr7	139036023	139036024	ZC3HAV1L	26	-	269	88	357	15	173	25	1	26	4	4	3	>ZC3HAV1L(-)_GCCCCGGCTCGCTGCGCCGC	>ZC3HAV1L(-)_GCCCCGGCTCGCTGCGCCGCGCGCACAGGGCCCGCGCCAGCGACCATG	>ZC3HAV1L(-)_CGCGCACAGGGCCCGCGCCAGCGACCATG
chr19	12035675	12035676	ZNF433	200	-	203	153	356	21	174	17	9	26	4	5	5	>ZNF433(-)_GAGTGTCCATCGGGGAGGGC	>ZNF433(-)_GAGTGTCCATCGGGGAGGGCGAAGGCCCTGCTCTCCTCGGTTCCCGGC	>ZNF433(-)_CGAAGGCCCTGCTCTCCTCGGTTCCCGGC
chr9	33264707	33264708	BAG1	212	-	207	145	352	36	174	21	5	26	5	7	3	>BAG1(-)_TGGGAAGTAGTCGGGCGGGG	>BAG1(-)_TGGGAAGTAGTCGGGCGGGGTTGTGAGACGCCGCGCTCAGCTTCCATC	>BAG1(-)_GTTGTGAGACGCCGCGCTCAGCTTCCATC
chr3	100334756	100334757	NIT2	70	+	295	57	352	23	171	24	2	26	8	7	5	>NIT2(+)_CCGTAGCGACGCCGCGGTCC	>NIT2(+)_CCGTAGCGACGCCGCGGTCCGCCGGATCTCCAGCGCTCAGTCCGCGCC	>NIT2(+)_CGCCGGATCTCCAGCGCTCAGTCCGCGCC
chr22	50507693	50507694	LMF2	94	-	262	89	351	15	164	25	1	26	2	13	9	>LMF2(-)_GCCGCGGGCGGGCGGACGCG	>LMF2(-)_GCCGCGGGCGGGCGGACGCGGAGGGCGGGCCCTGCTCTAGCGGGCCGC	>LMF2(-)_GGAGGGCGGGCCCTGCTCTAGCGGGCCGC
chr1	159925506	159925507	TAGLN2	406	-	160	190	350	86	126	17	9	26	13	10	4	>TAGLN2(-)_GGACCCTCCTGAAAATCCCC	>TAGLN2(-)_GGACCCTCCTGAAAATCCCCGGCTGGGCAGGGCGCACCACTTGCAGCT	>TAGLN2(-)_CGGCTGGGCAGGGCGCACCACTTGCAGCT
chr1	226186695	226186696	ACBD3	57	-	257	93	350	16	203	25	1	26	8	3	9	>ACBD3(-)_AGCAGGAAGTCGATACGTGG	>ACBD3(-)_AGCAGGAAGTCGATACGTGGCTGCCGTCTGTCCCCGCTGAGGAGGTGC	>ACBD3(-)_GCTGCCGTCTGTCCCCGCTGAGGAGGTGC
chr10	95656675	95656676	ALDH18A1	42	-	259	89	348	3	166	22	4	26	1	5	0	>ALDH18A1(-)_GTCATCGTGCGGGACGTGGA	>ALDH18A1(-)_GTCATCGTGCGGGACGTGGACGGAAGAAAAAAGAGAGTGAGCGAGCGC	>ALDH18A1(-)_ACGGAAGAAAAAAGAGAGTGAGCGAGCGC
chr9	83980614	83980615	HNRNPK	290	-	237	109	346	21	188	23	3	26	5	4	3	>HNRNPK(-)_CCTAGCCGCCCCTCCCCCCA	>HNRNPK(-)_CCTAGCCGCCCCTCCCCCCAGCTAGTGAGTGCGCGAACGAGAAAGGAG	>HNRNPK(-)_AGCTAGTGAGTGCGCGAACGAGAAAGGAG
chr7	66075833	66075834	ASL	162	+	152	192	344	171	113	16	10	26	23	19	2	>ASL(+)_TCCCGGCCAGAAAAGCCCTG	>ASL(+)_TCCCGGCCAGAAAAGCCCTGGCCAGTGGCGGGCGCGACACTATCCGTG	>ASL(+)_GGCCAGTGGCGGGCGCGACACTATCCGTG
chr19	48954905	48954906	BAX	100	+	272	70	342	14	101	21	5	26	11	6	10	>BAX(+)_CCCGGGCGCGCTGCGGCCGC	>BAX(+)_CCCGGGCGCGCTGCGGCCGCCCGCGCGGACCCGGCGAGAGGCGGCGGC	>BAX(+)_CCCGCGCGGACCCGGCGAGAGGCGGCGGC
chr17	7916288	7916289	RNF227	42	-	234	96	330	311	129	24	2	26	42	85	16	>RNF227(-)_TTATTCCCCTATTTAAAGGG	>RNF227(-)_TTATTCCCCTATTTAAAGGGGAAAGAGGCCGCGGCGCCGGCCCCAGGA	>RNF227(-)_GGAAAGAGGCCGCGGCGCCGGCCCCAGGA
chr9	112333607	112333608	PTBP3	105	-	239	91	330	9	170	22	4	26	1	7	6	>PTBP3(-)_GCGTGCCCGGTCCCCGCCCC	>PTBP3(-)_GCGTGCCCGGTCCCCGCCCCTGTTCCCACTCTCCTTCCACCTCGGACC	>PTBP3(-)_CTGTTCCCACTCTCCTTCCACCTCGGACC
chr2	20651078	20651079	HS1BP3	101	-	248	79	327	5	171	21	5	26	4	4	6	>HS1BP3(-)_GGGCACTGCCGGGTCCCGTG	>HS1BP3(-)_GGGCACTGCCGGGTCCCGTGACTGCGCGCCCCGCCCGGAGTCCCCGCC	>HS1BP3(-)_GACTGCGCGCCCCGCCCGGAGTCCCCGCC
chr19	1863578	1863579	KLF16	132	-	219	106	325	47	68	24	2	26	8	19	5	>KLF16(-)_CGCGCCGGGCCTCCTCCTCC	>KLF16(-)_CGCGCCGGGCCTCCTCCTCCTCCTCCTCCGCCTCCCGCACTCGAGCAG	>KLF16(-)_CTCCTCCTCCGCCTCCCGCACTCGAGCAG
chr2	37156966	37156967	EIF2AK2	99	-	276	47	323	13	157	24	2	26	4	10	6	>EIF2AK2(-)_GGAAGGCGGAGTCCAAGGGG	>EIF2AK2(-)_GGAAGGCGGAGTCCAAGGGGAAAACGAAACTGAGAACCAGCTCTCCCG	>EIF2AK2(-)_GAAAACGAAACTGAGAACCAGCTCTCCCG
chr1	84479265	84479266	RPF1	109	+	218	105	323	12	241	24	2	26	3	1	6	>RPF1(+)_GGTCACAGGAGAAGGCTATT	>RPF1(+)_GGTCACAGGAGAAGGCTATTTCCGTTTCCGTACGGAAGCAAAGGAGCC	>RPF1(+)_TTCCGTTTCCGTACGGAAGCAAAGGAGCC
chr7	1570031	1570032	PSMG3	94	-	282	41	323	11	182	23	3	26	15	3	0	>PSMG3(-)_CCGCGGACGGGGCGGGCCCG	>PSMG3(-)_CCGCGGACGGGGCGGGCCCGCGTGGCGCACGCAGAGCCACTTCCGGGC	>PSMG3(-)_GCGTGGCGCACGCAGAGCCACTTCCGGGC
chr9	137077486	137077487	UAP1L1	243	+	230	90	320	32	95	22	4	26	9	10	4	>UAP1L1(+)_GGGGTCTACACCGCCCGCCC	>UAP1L1(+)_GGGGTCTACACCGCCCGCCCGGTCTCGTGACGCTGGTCAGTGGCGCGG	>UAP1L1(+)_CGGTCTCGTGACGCTGGTCAGTGGCGCGG
chr6	26659719	26659720	ZNF322	108	-	208	111	319	0	139	24	2	26	0	4	4	>ZNF322(-)_ACTTGCGGGGGTGGGGCTGC	>ZNF322(-)_ACTTGCGGGGGTGGGGCTGCGCCGGCCTCTTCCCAGCCAGCTTGAAAG	>ZNF322(-)_CGCCGGCCTCTTCCCAGCCAGCTTGAAAG
chr15	57706713	57706714	POLR2M	78	+	231	86	317	17	199	25	1	26	2	6	3	>POLR2M(+)_AATTTCAATAAAGCTCGATT	>POLR2M(+)_AATTTCAATAAAGCTCGATTCGGCTCGAAGAAGACCCCGTTCTTCCGG	>POLR2M(+)_TCGGCTCGAAGAAGACCCCGTTCTTCCGG
chr16	28711473	28711474	EIF3C	94	+	174	142	316	6	217	18	8	26	6	3	7	>EIF3C(+)_TCCCGGAAGTGACGCGAGGA	>EIF3C(+)_TCCCGGAAGTGACGCGAGGACCCGCCTTCTCTCTCGGCGTTTCCGCTG	>EIF3C(+)_ACCCGCCTTCTCTCTCGGCGTTTCCGCTG
chr2	159712525	159712526	MARCH7	109	+	261	52	313	21	197	25	1	26	1	15	3	>MARCH7(+)_CACTTAACGGTGGTGGCTGG	>MARCH7(+)_CACTTAACGGTGGTGGCTGGTTCTGCGCCGGATCCGGGAGAGGGGCGG	>MARCH7(+)_GTTCTGCGCCGGATCCGGGAGAGGGGCGG
chr6	34888028	34888029	TAF11	95	-	257	56	313	6	211	24	2	26	5	7	7	>TAF11(-)_TCATCGCTGCGCGACGACAG	>TAF11(-)_TCATCGCTGCGCGACGACAGGAAGTAAGATCCTGGCCTGTGCAGCTCG	>TAF11(-)_GGAAGTAAGATCCTGGCCTGTGCAGCTCG
chr2	86441370	86441371	KDM3A	313	+	159	153	312	21	55	15	11	26	1	10	4	>KDM3A(+)_CCGGGAGGCTGTGCGTGTCT	>KDM3A(+)_CCGGGAGGCTGTGCGTGTCTTGTGAGAGCTCTTGAACCAAGTCAGCGC	>KDM3A(+)_TTGTGAGAGCTCTTGAACCAAGTCAGCGC
chr3	15427591	15427592	EAF1	77	+	247	65	312	8	224	23	3	26	4	10	2	>EAF1(+)_CCTACCCGACGCCGGAAGTC	>EAF1(+)_CCTACCCGACGCCGGAAGTCCCACGGCCTTGCCTCCTCAGATTCCTCT	>EAF1(+)_CCCACGGCCTTGCCTCCTCAGATTCCTCT
chr21	42893271	42893272	NDUFV3	35	+	254	57	311	21	105	21	5	26	2	4	1	>NDUFV3(+)_CTGGCCTGTAATTGGCGCAG	>NDUFV3(+)_CTGGCCTGTAATTGGCGCAGTCGGCCCAAGGGGCGGCTGTTCAGGCGC	>NDUFV3(+)_GTCGGCCCAAGGGGCGGCTGTTCAGGCGC
chr3	49786541	49786542	IP6K1	101	-	241	68	309	78	265	26	0	26	11	17	6	>IP6K1(-)_CCTGGTTACTATGACGCCCG	>IP6K1(-)_CCTGGTTACTATGACGCCCGGCCCCCGCCCCCTCGGCTAGCCGCCATC	>IP6K1(-)_GGCCCCCGCCCCCTCGGCTAGCCGCCATC
chr12	123602117	123602118	DDX55	58	+	220	88	308	3	177	22	4	26	3	1	6	>DDX55(+)_GGAAGTGCTCGTTGGGGGTG	>DDX55(+)_GGAAGTGCTCGTTGGGGGTGCACAAGGCGCGTTCGAGCAGCGGCGACC	>DDX55(+)_GCACAAGGCGCGTTCGAGCAGCGGCGACC
chr19	58558917	58558918	UBE2M	68	-	250	53	303	2	109	26	0	26	0	2	3	>UBE2M(-)_GCGGGAAGAGCCAAAGCGGG	>UBE2M(-)_GCGGGAAGAGCCAAAGCGGGCAGGCGGCGGAAATATCCGAAGCGGCGG	>UBE2M(-)_GCAGGCGGCGGAAATATCCGAAGCGGCGG
chr14	50116564	50116565	VCPKMT	28	-	210	91	301	33	212	20	6	26	14	3	4	>VCPKMT(-)_TGCGCGTTGATGTGACGTCC	>VCPKMT(-)_TGCGCGTTGATGTGACGTCCCTGCGCGCGCCGCTTTCTGTTGCCGGGC	>VCPKMT(-)_CCTGCGCGCGCCGCTTTCTGTTGCCGGGC
chr9	6015614	6015615	RANBP6	186	-	187	113	300	21	182	24	2	26	6	17	2	>RANBP6(-)_AGACCCCCTCCCTCCTTCCC	>RANBP6(-)_AGACCCCCTCCCTCCTTCCCGGTCGCGGTAGCTTTGACAGAGCGCAAT	>RANBP6(-)_CGGTCGCGGTAGCTTTGACAGAGCGCAAT
chr12	21501594	21501595	RECQL	19	-	189	110	299	13	199	22	4	26	8	12	9	>RECQL(-)_GGATGCTCTCAGCTGGCTGG	>RECQL(-)_GGATGCTCTCAGCTGGCTGGCGGGAAGATTTTACTCCCGAGTAGCGGA	>RECQL(-)_GCGGGAAGATTTTACTCCCGAGTAGCGGA
chr8	9002928	9002929	ERI1	54	+	234	64	298	7	235	21	5	26	4	7	4	>ERI1(+)_GACGCCACACGCTCCCGGAA	>ERI1(+)_GACGCCACACGCTCCCGGAAGTGGGAGGTGGCCGCTGGAGTTTGTGTG	>ERI1(+)_AGTGGGAGGTGGCCGCTGGAGTTTGTGTG
chr6	83193358	83193359	RWDD2A	79	+	230	67	297	21	181	22	4	26	13	3	2	>RWDD2A(+)_CAGAGGACTATCCGCCAGCC	>RWDD2A(+)_CAGAGGACTATCCGCCAGCCCCGCCCCCGCCTCGCCGCAGGTCGCGCG	>RWDD2A(+)_CCCGCCCCCGCCTCGCCGCAGGTCGCGCG
chr19	4670321	4670322	MYDGF	35	-	241	53	294	41	159	22	4	26	14	18	8	>MYDGF(-)_CCCTGCCCTGAGGACCCTAG	>MYDGF(-)_CCCTGCCCTGAGGACCCTAGTCCAACATGGCGGCGCCCAGCGGAGGGT	>MYDGF(-)_GTCCAACATGGCGGCGCCCAGCGGAGGGT
chr8	54135260	54135261	MRPL15	53	+	181	107	288	17	163	25	1	26	7	10	4	>MRPL15(+)_CGAGACCACGTGGCCTCCGA	>MRPL15(+)_CGAGACCACGTGGCCTCCGAGCAGCTCAGGGCGCCCTTGAAAGTTCTT	>MRPL15(+)_AGCAGCTCAGGGCGCCCTTGAAAGTTCTT
chr1	15976078	15976079	ZBTB17	298	-	232	52	284	0	270	24	2	26	1	6	7	>ZBTB17(-)_CAGCCGGGAAGCCTGCGAGG	>ZBTB17(-)_CAGCCGGGAAGCCTGCGAGGTCGGTTCCGCCCGACTCTAACATGGCGG	>ZBTB17(-)_GTCGGTTCCGCCCGACTCTAACATGGCGG
chr6	89829908	89829909	CASP8AP2	53	+	166	117	283	63	147	20	6	26	4	8	4	>CASP8AP2(+)_GGAGATGCCAGGGAGACCTC	>CASP8AP2(+)_GGAGATGCCAGGGAGACCTCGGTGGGCAGAAAGGAACCGGGTTGTCTT	>CASP8AP2(+)_CGGTGGGCAGAAAGGAACCGGGTTGTCTT
chr12	95858964	95858965	SNRPF	39	+	221	59	280	15	221	25	1	26	2	10	8	>SNRPF(+)_TGGTGGGAGGTGAAAGGTCA	>SNRPF(+)_TGGTGGGAGGTGAAAGGTCATAGTCCTGTTTGGCGGCCATTTCTCTTG	>SNRPF(+)_ATAGTCCTGTTTGGCGGCCATTTCTCTTG
chr12	109573493	109573494	MMAB	35	-	230	50	280	4	201	23	3	26	0	5	6	>MMAB(-)_GCGGACTGGACGGGAACCTG	>MMAB(-)_GCGGACTGGACGGGAACCTGGCGGGGTCAGGTCCCGTCAAGCAGCCTG	>MMAB(-)_GGCGGGGTCAGGTCCCGTCAAGCAGCCTG
chr17	5078479	5078480	ZFP3	61	+	225	53	278	9	137	23	3	26	1	4	2	>ZFP3(+)_TGCCGCCCGGGTACCGGAAG	>ZFP3(+)_TGCCGCCCGGGTACCGGAAGTGGCCGATGCCCGTCGCCAGTGACACCG	>ZFP3(+)_GTGGCCGATGCCCGTCGCCAGTGACACCG
chr19	1205778	1205779	STK11	62	+	159	115	274	17	164	20	6	26	7	13	8	>STK11(+)_GGCGTGCGGTGTCCGCGGCG	>STK11(+)_GGCGTGCGGTGTCCGCGGCGGCGCAGGGAGGGGGAGGGAGGTAAACAA	>STK11(+)_GGCGCAGGGAGGGGGAGGGAGGTAAACAA
chr8	65634176	65634177	ARMC1	69	-	195	77	272	26	205	20	6	26	8	13	11	>ARMC1(-)_AAGCGACAGAGGCGTCAGGT	>ARMC1(-)_AAGCGACAGAGGCGTCAGGTCACCTGGGAAGAGTCTGCAGAGCCTTTG	>ARMC1(-)_TCACCTGGGAAGAGTCTGCAGAGCCTTTG
chr19	45001465	45001466	RELB	15	+	224	43	267	1	141	20	6	26	0	0	0	>RELB(+)_CGCCCGCCGCCCGCCCGGCC	>RELB(+)_CGCCCGCCGCCCGCCCGGCCCGGCCCCGCGCCCCGCGCAGCCCCGGGC	>RELB(+)_CCGGCCCCGCGCCCCGCGCAGCCCCGGGC
chr20	46406591	46406592	ELMO2	34	-	208	57	265	3	241	23	3	26	2	8	9	>ELMO2(-)_CCAAGAAGGCGGGGCGGGCG	>ELMO2(-)_CCAAGAAGGCGGGGCGGGCGGAGGCTGGAGGAGCCGCCGAGCGGAGAC	>ELMO2(-)_GGAGGCTGGAGGAGCCGCCGAGCGGAGAC
chr2	96638323	96638324	KANSL3	510	-	193	71	264	6	117	20	6	26	5	5	4	>KANSL3(-)_CAGCGCCGGGGCGTGGAGGC	>KANSL3(-)_CAGCGCCGGGGCGTGGAGGCGTTAACGCGCACGCGCTTAGGGATCCGG	>KANSL3(-)_CGTTAACGCGCACGCGCTTAGGGATCCGG
chrX	118727599	118727600	IL13RA1	74	+	195	68	263	23	89	24	2	26	6	3	2	>IL13RA1(+)_GGGAAGTGGAAGAGGGAGCG	>IL13RA1(+)_GGGAAGTGGAAGAGGGAGCGAAGGAGGCGGGGACTGCCAAGGCTCCAG	>IL13RA1(+)_GAAGGAGGCGGGGACTGCCAAGGCTCCAG
chr1	11980445	11980446	MFN2	43	+	185	72	257	9	248	21	5	26	7	4	6	>MFN2(+)_CTCCCGCCTCCCCCTGGGGT	>MFN2(+)_CTCCCGCCTCCCCCTGGGGTGGCGCTCGCTGGTGACGTAGTGAGTGTG	>MFN2(+)_TGGCGCTCGCTGGTGACGTAGTGAGTGTG
chr9	122931491	122931492	ZBTB26	47	-	235	15	250	12	186	24	2	26	2	11	5	>ZBTB26(-)_GGCTCGGGTTCCTTGCCCCT	>ZBTB26(-)_GGCTCGGGTTCCTTGCCCCTCCCCCTTCCCGGAGCCCCGAGGGGCCGG	>ZBTB26(-)_TCCCCCTTCCCGGAGCCCCGAGGGGCCGG
chr1	46303690	46303691	UQCRH	32	+	139	109	248	25	169	23	3	26	18	7	11	>UQCRH(+)_TTCCGGCCAGATCGCCGGAT	>UQCRH(+)_TTCCGGCCAGATCGCCGGATTTCCGCTGAGTGACCCTTACAAGTCCTT	>UQCRH(+)_TTTCCGCTGAGTGACCCTTACAAGTCCTT
chr3	100401401	100401402	TOMM70	36	-	191	56	247	18	223	23	3	26	4	20	15	>TOMM70(-)_CATTCCAGTGCTGTGCCGCT	>TOMM70(-)_CATTCCAGTGCTGTGCCGCTGCTTTTTCTTCCACTCGGATCTCTTGAG	>TOMM70(-)_TGCTTTTTCTTCCACTCGGATCTCTTGAG
chr19	10106352	10106353	PPAN	37	+	189	53	242	21	245	23	3	26	9	3	4	>PPAN(+)_GCCGGCTCTCAGGCGCCGGA	>PPAN(+)_GCCGGCTCTCAGGCGCCGGAAGTGAGCTGCGCAGCGCCGGAAGCGGCG	>PPAN(+)_AAGTGAGCTGCGCAGCGCCGGAAGCGGCG
chr19	10106352	10106353	PPAN-P2RY11	37	+	189	53	242	21	245	23	3	26	9	3	4	>PPAN-P2RY11(+)_GCCGGCTCTCAGGCGCCGGA	>PPAN-P2RY11(+)_GCCGGCTCTCAGGCGCCGGAAGTGAGCTGCGCAGCGCCGGAAGCGGCG	>PPAN-P2RY11(+)_AAGTGAGCTGCGCAGCGCCGGAAGCGGCG
chr17	75979599	75979600	TEN1	92	+	161	76	237	36	157	21	5	26	5	6	3	>TEN1(+)_TGCGCCTGCACTTGCCCCCC	>TEN1(+)_TGCGCCTGCACTTGCCCCCCTCTTACCCCGCGGCCTCTGTCACGCTTC	>TEN1(+)_CTCTTACCCCGCGGCCTCTGTCACGCTTC
chr17	75979599	75979600	TEN1-CDK3	92	+	161	76	237	36	157	21	5	26	5	6	3	>TEN1-CDK3(+)_TGCGCCTGCACTTGCCCCCC	>TEN1-CDK3(+)_TGCGCCTGCACTTGCCCCCCTCTTACCCCGCGGCCTCTGTCACGCTTC	>TEN1-CDK3(+)_CTCTTACCCCGCGGCCTCTGTCACGCTTC
chr6	292108	292109	DUSP22	111	+	198	39	237	1	94	25	1	26	0	1	3	>DUSP22(+)_TCTGGCCTCCGGGGCCGGCC	>DUSP22(+)_TCTGGCCTCCGGGGCCGGCCGCCTGGGAGCCCGAGCCTAGTGCCTCCC	>DUSP22(+)_CGCCTGGGAGCCCGAGCCTAGTGCCTCCC
chr3	48466252	48466253	TREX1	67	+	128	102	230	22	125	21	5	26	2	1	1	>TREX1(+)_CCCACGCCAAGTTTCACTTC	>TREX1(+)_CCCACGCCAAGTTTCACTTCCCGCCACTGCTGCCAGCGAGAGCCGCGG	>TREX1(+)_CCCGCCACTGCTGCCAGCGAGAGCCGCGG
chr9	7799777	7799778	DMAC1	398	-	125	101	226	8	141	19	7	26	6	6	8	>DMAC1(-)_CTTTCCGGCGCTCTGCCTTC	>DMAC1(-)_CTTTCCGGCGCTCTGCCTTCCGGTGCGTCGTTTACGCCAGTTTGAACC	>DMAC1(-)_CCGGTGCGTCGTTTACGCCAGTTTGAACC
chr12	119667951	119667952	PRKAB1	25	+	167	58	225	18	181	24	2	26	3	0	0	>PRKAB1(+)_CCTCCACGCCCTAGGCCGGG	>PRKAB1(+)_CCTCCACGCCCTAGGCCGGGCCGACTTACGGAGTCGCCGGAAGCGGAA	>PRKAB1(+)_GCCGACTTACGGAGTCGCCGGAAGCGGAA
chr2	127526488	127526489	IWS1	140	-	191	34	225	5	221	25	1	26	0	1	0	>IWS1(-)_CGGCGCCTGCGCGCTGCATT	>IWS1(-)_CGGCGCCTGCGCGCTGCATTCCTTTGAGGGTCGTGGGCAGACGCCATT	>IWS1(-)_TCCTTTGAGGGTCGTGGGCAGACGCCATT
chr16	19114004	19114005	ITPRIPL2	152	+	134	89	223	24	113	21	5	26	4	3	7	>ITPRIPL2(+)_CCGGCTCGCCAGCTCCACGC	>ITPRIPL2(+)_CCGGCTCGCCAGCTCCACGCTCGGCTCCAGACTCCGGCATTTCCTCCC	>ITPRIPL2(+)_CTCGGCTCCAGACTCCGGCATTTCCTCCC
chr11	44095677	44095678	EXT2	168	+	177	46	223	5	207	22	4	26	3	4	5	>EXT2(+)_GGCCCGGCAGCTCCCGCATG	>EXT2(+)_GGCCCGGCAGCTCCCGCATGCGCAGTGCGCTCGGTGTCAGACGGCCCG	>EXT2(+)_GCGCAGTGCGCTCGGTGTCAGACGGCCCG
chr17	45620351	45620352	LINC02210-CRHR1	41	+	171	51	222	1	282	25	1	26	3	7	5	>LINC02210-CRHR1(+)_CGCCAGAGGAGGGCGGAAGA	>LINC02210-CRHR1(+)_CGCCAGAGGAGGGCGGAAGATTCCCCGCCCCCACTTCTAGGCTTGGTT	>LINC02210-CRHR1(+)_ATTCCCCGCCCCCACTTCTAGGCTTGGTT
chr6	31666100	31666101	CSNK2B	79	+	159	60	219	6	147	25	1	26	1	18	11	>CSNK2B(+)_TCTTCCCCACCCTCCCTAAT	>CSNK2B(+)_TCTTCCCCACCCTCCCTAATTTCCACTCCCCCCACCCCACTTCGCCTG	>CSNK2B(+)_TTTCCACTCCCCCCACCCCACTTCGCCTG
chr9	88388460	88388461	SPIN1	66	+	192	21	213	4	210	26	0	26	2	4	4	>SPIN1(+)_CGGCGAGGGAGCGGGGGCGG	>SPIN1(+)_CGGCGAGGGAGCGGGGGCGGGGAGGCGCCGTCTGGCTCAGGCTGGGGC	>SPIN1(+)_GGGAGGCGCCGTCTGGCTCAGGCTGGGGC
chr17	50151087	50151088	PPP1R9B	180	-	169	39	208	15	153	24	2	26	3	16	11	>PPP1R9B(-)_GCGGCGGCTGCGAGAAGGGC	>PPP1R9B(-)_GCGGCGGCTGCGAGAAGGGCAGCCGCTCGGTCTCCGGCAGCCGCCGCT	>PPP1R9B(-)_CAGCCGCTCGGTCTCCGGCAGCCGCCGCT
chr19	49640120	49640121	RRAS	31	-	145	60	205	3	143	22	4	26	7	27	12	>RRAS(-)_CCCCCGGGTCCCGCCCGGCT	>RRAS(-)_CCCCCGGGTCCCGCCCGGCTCCCCCGCAGGCGGTAGCGAAGGCAGCAG	>RRAS(-)_TCCCCCGCAGGCGGTAGCGAAGGCAGCAG
chr7	100436473	100436474	PPP1R35	85	-	131	70	201	20	103	22	4	26	4	3	1	>PPP1R35(-)_CCGAAGGAAAGGGTTAACGG	>PPP1R35(-)_CCGAAGGAAAGGGTTAACGGTTTCCGGTAGCGGCGTCTAGGAGGGGCG	>PPP1R35(-)_GTTTCCGGTAGCGGCGTCTAGGAGGGGCG
chr19	2427546	2427547	TIMM13	84	-	143	58	201	16	145	24	2	26	4	4	3	>TIMM13(-)_GTTAGTTACGAGTCGGCGCA	>TIMM13(-)_GTTAGTTACGAGTCGGCGCACGCGGCCTCGGTCCGGTTGACTTTGCGG	>TIMM13(-)_ACGCGGCCTCGGTCCGGTTGACTTTGCGG
chr15	97960702	97960703	ARRDC4	180	+	129	68	197	15	162	23	3	26	3	4	2	>ARRDC4(+)_CCCGGCCCTTTTCCAGGCCC	>ARRDC4(+)_CCCGGCCCTTTTCCAGGCCCAACTGGGTTTGTTAAAGCGACAGGCCTC	>ARRDC4(+)_CAACTGGGTTTGTTAAAGCGACAGGCCTC
chr18	46072259	46072260	PSTPIP2	173	-	146	46	192	28	168	25	1	26	4	9	1	>PSTPIP2(-)_GTGTGGAACGCAGAAGTTGA	>PSTPIP2(-)_GTGTGGAACGCAGAAGTTGAGTCTGCGGAGCCGCGGGCAGTGGCAGTC	>PSTPIP2(-)_AGTCTGCGGAGCCGCGGGCAGTGGCAGTC
chr20	38962367	38962368	DHX35	11	+	127	55	182	0	198	25	1	26	0	1	6	>DHX35(+)_GGTGGGGTGGAGCTAGCCTC	>DHX35(+)_GGTGGGGTGGAGCTAGCCTCGTGACCTTTTACCCCAACATGGCTGCGC	>DHX35(+)_CGTGACCTTTTACCCCAACATGGCTGCGC
chr12	116277683	116277684	MED13L	39	-	127	40	167	3	95	22	4	26	10	1	3	>MED13L(-)_GGCGGGCCGAGCCGCGGTCG	>MED13L(-)_GGCGGGCCGAGCCGCGGTCGGCGGCCGCCATTGCTGTCAGAGCAAGCG	>MED13L(-)_GGCGGCCGCCATTGCTGTCAGAGCAAGCG
chr4	56387428	56387429	AASDH	53	-	128	36	164	17	173	23	3	26	4	2	1	>AASDH(-)_AGCTTTACGGCTTCTGGGAG	>AASDH(-)_AGCTTTACGGCTTCTGGGAGCTGCTGCTTCGCTGTGAGAAGTATCCGC	>AASDH(-)_GCTGCTGCTTCGCTGTGAGAAGTATCCGC
chr11	114400651	114400652	RBM7	21	+	101	50	151	11	147	24	2	26	1	2	3	>RBM7(+)_CGCAGTGGGTGCGTCGGCCA	>RBM7(+)_CGCAGTGGGTGCGTCGGCCACGACCTTTTGGCCAGGTTAGGGAGGGGG	>RBM7(+)_ACGACCTTTTGGCCAGGTTAGGGAGGGGG
chr6	27814776	27814777	HIST1H2AJ	102	-	86	48	134	156	87	16	10	26	13	17	1	>HIST1H2AJ(-)_TAGAGGCTATAAAATGTACG	>HIST1H2AJ(-)_TAGAGGCTATAAAATGTACGTTTTTCCAATTTCATTTCAGTCTTTCTT	>HIST1H2AJ(-)_GTTTTTCCAATTTCATTTCAGTCTTTCTT
chr8	143815705	143815706	SCRIB	18	-	105	29	134	5	82	24	2	26	3	10	2	>SCRIB(-)_GGCCGGGTGGGTGTCGGCGG	>SCRIB(-)_GGCCGGGTGGGTGTCGGCGGGGCAGTCCGGCGGGCAGCGGCGGTTCCG	>SCRIB(-)_GGGCAGTCCGGCGGGCAGCGGCGGTTCCG
chr16	2912012	2912013	FLYWCH1	27	+	109	21	130	0	67	21	5	26	0	1	2	>FLYWCH1(+)_GGTCGCGCGCGCGGTCACGG	>FLYWCH1(+)_GGTCGCGCGCGCGGTCACGGGGCTCGCTCCCGAGGGGCAGGTCGGGGC	>FLYWCH1(+)_GGGCTCGCTCCCGAGGGGCAGGTCGGGGC
chr17	17496394	17496395	RASD1	1541	-	340	361	701	794	130	19	6	25	85	79	16	>RASD1(-)_CAGGCTGCATATAAGGGCGG	>RASD1(-)_CAGGCTGCATATAAGGGCGGCGGCCGGGCGCCAAAGCCAGAGCAAGCG	>RASD1(-)_GCGGCCGGGCGCCAAAGCCAGAGCAAGCG
chr1	117606047	117606048	TENT5C	227	+	383	297	680	270	179	16	9	25	39	123	30	>TENT5C(+)_GTCCCGCCGTATAAGAACGG	>TENT5C(+)_GTCCCGCCGTATAAGAACGGAGGGGGCGGCGGCGGGACGGCTCACTCG	>TENT5C(+)_GAGGGGGCGGCGGCGGGACGGCTCACTCG
chr8	56211788	56211789	CHCHD7	1095	+	249	431	680	234	170	14	11	25	26	74	24	>CHCHD7(+)_TGCGCGCTACTTAAGGTCCT	>CHCHD7(+)_TGCGCGCTACTTAAGGTCCTGCTGCGTGAGCCATTGACGTGTTTGGAG	>CHCHD7(+)_TGCTGCGTGAGCCATTGACGTGTTTGGAG
chr7	112450459	112450460	IFRD1	266	+	245	421	666	552	87	14	11	25	39	15	10	>IFRD1(+)_GGTATTGCTACTTAAGGCGT	>IFRD1(+)_GGTATTGCTACTTAAGGCGTCGTGGCCTCCCCTGCCCCGCCTTAGCTC	>IFRD1(+)_TCGTGGCCTCCCCTGCCCCGCCTTAGCTC
chr11	10305076	10305077	ADM	1703	+	177	460	637	1209	123	10	15	25	163	45	16	>ADM(+)_GTGCGCTTATAAAGCACAGG	>ADM(+)_GTGCGCTTATAAAGCACAGGAACCAGAGCTGGCCACTCAGTGGTTTCT	>ADM(+)_GAACCAGAGCTGGCCACTCAGTGGTTTCT
chr19	52857618	52857619	ZNF28	542	-	193	435	628	27	165	7	18	25	10	0	2	>ZNF28(-)_CCAGGCCTGGTTTCTGTCCT	>ZNF28(-)_CCAGGCCTGGTTTCTGTCCTGCGCGCGCAGATTCGCGCAGACCAGGAA	>ZNF28(-)_TGCGCGCGCAGATTCGCGCAGACCAGGAA
chr19	52857618	52857619	ZNF468	542	-	193	435	628	27	165	7	18	25	10	0	2	>ZNF468(-)_CCAGGCCTGGTTTCTGTCCT	>ZNF468(-)_CCAGGCCTGGTTTCTGTCCTGCGCGCGCAGATTCGCGCAGACCAGGAA	>ZNF468(-)_TGCGCGCGCAGATTCGCGCAGACCAGGAA
chr9	129803183	129803184	TOR1B	132	+	475	149	624	34	206	21	4	25	9	11	18	>TOR1B(+)_AAGTCCGTCCTGCCGCTTGG	>TOR1B(+)_AAGTCCGTCCTGCCGCTTGGCCGCGGGGCGCCTGGCTCAGTGGCTTCT	>TOR1B(+)_GCCGCGGGGCGCCTGGCTCAGTGGCTTCT
chr1	185317242	185317243	IVNS1ABP	3266	-	356	231	587	116	168	21	4	25	47	33	27	>IVNS1ABP(-)_GAGGGGGTGCGGCGCGAGCG	>IVNS1ABP(-)_GAGGGGGTGCGGCGCGAGCGGTCGGCGGCGGCGGAGGCAGTGTCTCCC	>IVNS1ABP(-)_GGTCGGCGGCGGCGGAGGCAGTGTCTCCC
chr3	180912664	180912665	FXR1	69	+	257	277	534	49	149	18	7	25	6	9	1	>FXR1(+)_CCTCCCCTCTGGTTGGAAAG	>FXR1(+)_CCTCCCCTCTGGTTGGAAAGTTTCTAGAATCTCTTCCCAGCGGCCTTT	>FXR1(+)_GTTTCTAGAATCTCTTCCCAGCGGCCTTT
chr21	34073577	34073578	MRPS6	546	+	239	289	528	454	81	19	6	25	55	34	6	>MRPS6(+)_CCAGCGCCTTTAAGCCCGGG	>MRPS6(+)_CCAGCGCCTTTAAGCCCGGGCTCGCGCTCTCGGACCGTGCTTTCGCCG	>MRPS6(+)_GCTCGCGCTCTCGGACCGTGCTTTCGCCG
chr21	34073577	34073578	SLC5A3	546	+	239	289	528	454	81	19	6	25	55	34	6	>SLC5A3(+)_CCAGCGCCTTTAAGCCCGGG	>SLC5A3(+)_CCAGCGCCTTTAAGCCCGGGCTCGCGCTCTCGGACCGTGCTTTCGCCG	>SLC5A3(+)_GCTCGCGCTCTCGGACCGTGCTTTCGCCG
chr15	64703214	64703215	OAZ2	916	-	275	252	527	4	156	16	9	25	12	1	8	>OAZ2(-)_GGCGGCGGCGGCGGCGGCGG	>OAZ2(-)_GGCGGCGGCGGCGGCGGCGGTGGCGGCCGGGGAGGGTCAGTTGGAGGC	>OAZ2(-)_GTGGCGGCCGGGGAGGGTCAGTTGGAGGC
chr1	145608047	145608048	GPR89A	136	+	370	148	518	23	154	21	4	25	5	4	3	>GPR89A(+)_GAGAGCCGCAGTCCCGGCTG	>GPR89A(+)_GAGAGCCGCAGTCCCGGCTGCAGCACCTGGGAGAAGGCAGACCGTGTG	>GPR89A(+)_GCAGCACCTGGGAGAAGGCAGACCGTGTG
chr9	128276275	128276276	SWI5	158	+	406	111	517	27	142	22	3	25	2	10	3	>SWI5(+)_CGGCTTTCCTTGGGTGCGCG	>SWI5(+)_CGGCTTTCCTTGGGTGCGCGCGCAGCTTTCTGTGCGCCAGTTCACACT	>SWI5(+)_GCGCAGCTTTCTGTGCGCCAGTTCACACT
chr11	64359181	64359182	RPS6KA4	84	+	459	58	517	17	186	22	3	25	8	6	6	>RPS6KA4(+)_CGGCACCAGGAAGCGCCCGC	>RPS6KA4(+)_CGGCACCAGGAAGCGCCCGCCCCGGCCGGAGCCGCCATGTAACCGGCG	>RPS6KA4(+)_CCCCGGCCGGAGCCGCCATGTAACCGGCG
chr10	52314282	52314283	DKK1	1654	+	183	326	509	423	165	17	8	25	48	74	26	>DKK1(+)_CCGCGGTATAAAGGCAGCCG	>DKK1(+)_CCGCGGTATAAAGGCAGCCGCGGTGGCGGTGGCGGCGCAGAGCTCTGT	>DKK1(+)_GCGGTGGCGGTGGCGGCGCAGAGCTCTGT
chr1	28369740	28369741	PHACTR4	486	+	446	60	506	98	140	21	4	25	21	8	3	>PHACTR4(+)_GGCTCCCTTTTTCCCCCTCC	>PHACTR4(+)_GGCTCCCTTTTTCCCCCTCCCCGGGGGCCAAGGGCTCCGGCTGCTGCC	>PHACTR4(+)_CCCGGGGGCCAAGGGCTCCGGCTGCTGCC
chr17	70169531	70169532	KCNJ2	370	+	198	306	504	68	138	14	11	25	9	12	5	>KCNJ2(+)_TGTCGCACGGACCGCCTCAA	>KCNJ2(+)_TGTCGCACGGACCGCCTCAAAAGAGCCCAGGATATTGCAGAGCGCACT	>KCNJ2(+)_AAAGAGCCCAGGATATTGCAGAGCGCACT
chr19	45507486	45507487	VASP	50	+	199	289	488	125	112	18	7	25	16	25	5	>VASP(+)_ATTTTGGAACGAAATGTAAC	>VASP(+)_ATTTTGGAACGAAATGTAACGAAGAGAAGTACAGTAGTAAGAGTAACA	>VASP(+)_CGAAGAGAAGTACAGTAGTAAGAGTAACA
chr11	14499810	14499811	COPB1	442	-	307	181	488	47	188	18	7	25	13	20	8	>COPB1(-)_CAAGGACTCTGGAGCCGCCG	>COPB1(-)_CAAGGACTCTGGAGCCGCCGCCGCCGCTGCTGCGGTTCATAGCCGGAG	>COPB1(-)_GCCGCCGCTGCTGCGGTTCATAGCCGGAG
chr6	35688914	35688915	FKBP5	832	-	303	183	486	33	172	21	4	25	8	13	4	>FKBP5(-)_GCTGCCCCGGGGATTCGGGC	>FKBP5(-)_GCTGCCCCGGGGATTCGGGCCGGCTCGCGGGCGCTGCCAGTCTCGGGC	>FKBP5(-)_CCGGCTCGCGGGCGCTGCCAGTCTCGGGC
chr22	38705943	38705944	GTPBP1	183	+	323	162	485	36	214	20	5	25	9	11	2	>GTPBP1(+)_GAGCCTGGGAGGGAGGGAAG	>GTPBP1(+)_GAGCCTGGGAGGGAGGGAAGCCGGCTACGAATTAGCCTAAGTTATTAA	>GTPBP1(+)_GCCGGCTACGAATTAGCCTAAGTTATTAA
chr12	12357117	12357118	BORCS5	428	+	329	151	480	39	157	22	3	25	16	30	28	>BORCS5(+)_CTGCGTCCCGGAAGGAGCGA	>BORCS5(+)_CTGCGTCCCGGAAGGAGCGAGCTTGCGGAGCGTGAACCAGTGAGTGAA	>BORCS5(+)_AGCTTGCGGAGCGTGAACCAGTGAGTGAA
chr9	128689258	128689259	SET	150	+	301	178	479	49	142	22	3	25	10	9	11	>SET(+)_CCCCTCGCCGTAGGAGGAGG	>SET(+)_CCCCTCGCCGTAGGAGGAGGTGGAGGAGGAGGCGGCTCGGGAGAGCGA	>SET(+)_GTGGAGGAGGAGGCGGCTCGGGAGAGCGA
chr17	15999823	15999824	TTC19	1226	+	282	194	476	38	162	18	7	25	7	33	12	>TTC19(+)_CGGCGCGTGGTCGGGGGCCA	>TTC19(+)_CGGCGCGTGGTCGGGGGCCAGGAGCGCGTCTGGCCTGCAGTGCGCAGA	>TTC19(+)_AGGAGCGCGTCTGGCCTGCAGTGCGCAGA
chr2	69742133	69742134	ANXA4	256	+	233	240	473	76	172	16	9	25	5	7	2	>ANXA4(+)_GTCCCGGATAAGACCCGCTG	>ANXA4(+)_GTCCCGGATAAGACCCGCTGTCTGGCCCTGAGTAGGGTGTGACCTCCG	>ANXA4(+)_GTCTGGCCCTGAGTAGGGTGTGACCTCCG
chr11	121292770	121292771	SC5D	1114	+	245	223	468	45	163	20	5	25	10	9	8	>SC5D(+)_CCTCCCGGCCCGCTTGCTGG	>SC5D(+)_CCTCCCGGCCCGCTTGCTGGCTGCCCAGCTGCTAGGACAGTTTGCAGA	>SC5D(+)_GCTGCCCAGCTGCTAGGACAGTTTGCAGA
chr2	74178878	74178879	MOB1A	131	-	322	145	467	64	199	17	8	25	9	7	3	>MOB1A(-)_CAGCGAAACCTTAGCTCGCG	>MOB1A(-)_CAGCGAAACCTTAGCTCGCGAGATTTTGTTGGTTCCGCATTTCGGGTC	>MOB1A(-)_GAGATTTTGTTGGTTCCGCATTTCGGGTC
chr8	70669155	70669156	LACTB2	343	-	270	191	461	49	184	20	5	25	11	18	7	>LACTB2(-)_ATCCCCGGCCTGTTGGCTTC	>LACTB2(-)_ATCCCCGGCCTGTTGGCTTCTTCCGCGCTGGAGTATCCAGATAGGCGA	>LACTB2(-)_CTTCCGCGCTGGAGTATCCAGATAGGCGA
chr17	82229044	82229045	SLC16A3	467	+	260	195	455	451	67	23	2	25	44	53	10	>SLC16A3(+)_GAGCACTTAAAGTCGCCCCC	>SLC16A3(+)_GAGCACTTAAAGTCGCCCCCGGCGCGGAGCGGACCGGCAGAGGCGGGC	>SLC16A3(+)_CGGCGCGGAGCGGACCGGCAGAGGCGGGC
chr16	67968612	67968613	SLC12A4	76	-	299	155	454	15	119	18	7	25	7	7	14	>SLC12A4(-)_CGAGCGGGCGGGGCGTGTCG	>SLC12A4(-)_CGAGCGGGCGGGGCGTGTCGGCCCGGGGCGGCGGGGACAGCGGCGGGG	>SLC12A4(-)_GGCCCGGGGCGGCGGGGACAGCGGCGGGG
chr16	30894022	30894023	BCL7C	31	-	352	97	449	11	85	22	3	25	0	0	0	>BCL7C(-)_AACTCCAGGGGGGACGGCAG	>BCL7C(-)_AACTCCAGGGGGGACGGCAGGCCGAGAGCGCGGCGCCCGGGCCTGGCG	>BCL7C(-)_GGCCGAGAGCGCGGCGCCCGGGCCTGGCG
chr19	1905398	1905399	ADAT3	190	+	371	69	440	45	247	23	2	25	4	11	4	>ADAT3(+)_CGAGGCGGGGTGAGGTGGGT	>ADAT3(+)_CGAGGCGGGGTGAGGTGGGTTGGGCCGGGCCGGTTGCTAAGACTTGGC	>ADAT3(+)_TTGGGCCGGGCCGGTTGCTAAGACTTGGC
chr19	1905398	1905399	SCAMP4	190	+	371	69	440	45	247	23	2	25	4	11	4	>SCAMP4(+)_CGAGGCGGGGTGAGGTGGGT	>SCAMP4(+)_CGAGGCGGGGTGAGGTGGGTTGGGCCGGGCCGGTTGCTAAGACTTGGC	>SCAMP4(+)_TTGGGCCGGGCCGGTTGCTAAGACTTGGC
chr10	119872842	119872843	MCMBP	115	-	319	120	439	6	179	21	4	25	9	15	13	>MCMBP(-)_GTCGCAGGCAGCGCGGTCGG	>MCMBP(-)_GTCGCAGGCAGCGCGGTCGGCGGCGGCTATTTCCCGCCATTGTGCGAA	>MCMBP(-)_GCGGCGGCTATTTCCCGCCATTGTGCGAA
chr20	50958531	50958532	DPM1	340	-	300	137	437	107	192	19	6	25	27	19	12	>DPM1(-)_GCGCCACATTACGTAATTCC	>DPM1(-)_GCGCCACATTACGTAATTCCGCTTCCGGCATCTGGCTCAGTTCCGCCA	>DPM1(-)_CGCTTCCGGCATCTGGCTCAGTTCCGCCA
chr3	52686031	52686032	GNL3	387	+	180	257	437	64	171	19	6	25	24	14	14	>GNL3(+)_GGCGGCAGCGTAAGTGCGTG	>GNL3(+)_GGCGGCAGCGTAAGTGCGTGACGCTCGTCAGTGGCTTCAGTTCACACG	>GNL3(+)_GACGCTCGTCAGTGGCTTCAGTTCACACG
chr16	24539567	24539568	RBBP6	269	+	180	255	435	33	128	13	12	25	12	10	2	>RBBP6(+)_GCGCGCCGCCCGTGCAATCC	>RBBP6(+)_GCGCGCCGCCCGTGCAATCCCTGCTTAAGAGACCCCGCAGTGGGGCGC	>RBBP6(+)_CCTGCTTAAGAGACCCCGCAGTGGGGCGC
chr6	158168245	158168246	SERAC1	83	-	318	115	433	3	182	19	6	25	2	4	1	>SERAC1(-)_GCCCAGAGCGGGCCGAGGGG	>SERAC1(-)_GCCCAGAGCGGGCCGAGGGGGCGGGGTCACGAGCCGCCAGCCGCCGGG	>SERAC1(-)_GGCGGGGTCACGAGCCGCCAGCCGCCGGG
chr2	131105335	131105336	PLEKHB2	463	+	261	172	433	1	177	20	5	25	0	4	2	>PLEKHB2(+)_TGACGTCAGAACGGCGGCCA	>PLEKHB2(+)_TGACGTCAGAACGGCGGCCAGGACGCCGGACGTGCGGCAGTTGCAGGC	>PLEKHB2(+)_AGGACGCCGGACGTGCGGCAGTTGCAGGC
chr2	101308689	101308690	RNF149	413	-	255	177	432	35	161	21	4	25	10	5	4	>RNF149(-)_CGCCAGGTGCGCGTGCGCAG	>RNF149(-)_CGCCAGGTGCGCGTGCGCAGCGGCCCCGACCCCGCCTCAGTCTTCCAG	>RNF149(-)_GCGGCCCCGACCCCGCCTCAGTCTTCCAG
chr20	36605780	36605781	RAB5IF	81	+	343	83	426	23	193	23	2	25	3	11	12	>RAB5IF(+)_ACACTGCACCGCCCCTCCCT	>RAB5IF(+)_ACACTGCACCGCCCCTCCCTTCGCGGCGCCTGCTCTGTAGAGCCGGCG	>RAB5IF(+)_TTCGCGGCGCCTGCTCTGTAGAGCCGGCG
chr5	122775083	122775084	SNX2	106	+	277	148	425	28	155	21	4	25	15	2	2	>SNX2(+)_CGTGCTCACGTGACGGGTCC	>SNX2(+)_CGTGCTCACGTGACGGGTCCGCGAGGCCCAGCTCGCGCAGTCGTTCGG	>SNX2(+)_CGCGAGGCCCAGCTCGCGCAGTCGTTCGG
chr21	42010347	42010348	ZBTB21	60	-	345	79	424	5	154	23	2	25	1	13	9	>ZBTB21(-)_CGATGACCTCATCCCTGGTG	>ZBTB21(-)_CGATGACCTCATCCCTGGTGTGGGATGACGTCAAATTCAAGATGGATG	>ZBTB21(-)_GTGGGATGACGTCAAATTCAAGATGGATG
chr1	16352453	16352454	FBXO42	48	-	347	75	422	12	262	23	2	25	14	4	8	>FBXO42(-)_CGCATGCGCGCTCTGCGCTG	>FBXO42(-)_CGCATGCGCGCTCTGCGCTGTCTTCTCCCGGCCTGAGCAGCAGCAGCT	>FBXO42(-)_GTCTTCTCCCGGCCTGAGCAGCAGCAGCT
chr11	61333239	61333240	TKFC	281	+	321	98	419	14	178	21	4	25	9	5	4	>TKFC(+)_CCGGAGGCACCGCCTCGCCT	>TKFC(+)_CCGGAGGCACCGCCTCGCCTCTTTCCGCCAGCGCCCGCAGGACCCGGA	>TKFC(+)_TCTTTCCGCCAGCGCCCGCAGGACCCGGA
chr18	9102730	9102731	NDUFV2	269	+	374	43	417	32	279	21	4	25	3	16	15	>NDUFV2(+)_CTCGGGATTCTCGCCTGGCG	>NDUFV2(+)_CTCGGGATTCTCGCCTGGCGCGGCTGGGGAAGGTGAACAGTGTGGCCC	>NDUFV2(+)_GCGGCTGGGGAAGGTGAACAGTGTGGCCC
chr9	19127491	19127492	PLIN2	928	-	173	240	413	180	109	19	6	25	11	35	10	>PLIN2(-)_GAGGCGGGGTTTATAGCCCG	>PLIN2(-)_GAGGCGGGGTTTATAGCCCGGGCGCCCGCGGGCCCCACGCTTTGACCG	>PLIN2(-)_GGGCGCCCGCGGGCCCCACGCTTTGACCG
chr20	63865328	63865329	TPD52L2	567	+	279	133	412	76	148	24	1	25	24	24	11	>TPD52L2(+)_CGCGGCGAGCTTCTCCCGGC	>TPD52L2(+)_CGCGGCGAGCTTCTCCCGGCGCCGCCCGCTCGGCTCCCATAGCGCCCG	>TPD52L2(+)_CGCCGCCCGCTCGGCTCCCATAGCGCCCG
chr6	158644738	158644739	DYNLT1	310	-	244	168	412	18	152	19	6	25	17	0	6	>DYNLT1(-)_GGCGGGGCCTGAGTGCGCCT	>DYNLT1(-)_GGCGGGGCCTGAGTGCGCCTGCGCAGTCCGCGCCACTCAGGGAGCCGG	>DYNLT1(-)_TGCGCAGTCCGCGCCACTCAGGGAGCCGG
chrX	13689129	13689130	RAB9A	105	+	321	90	411	37	96	25	0	25	18	1	9	>RAB9A(+)_CCCGCTTTTTCCCTGGCCCC	>RAB9A(+)_CCCGCTTTTTCCCTGGCCCCGCCCCGGCCCGTCGCCATGTTGTTCCCT	>RAB9A(+)_CGCCCCGGCCCGTCGCCATGTTGTTCCCT
chr11	35139173	35139174	CD44	332	+	215	195	410	163	103	23	2	25	28	56	20	>CD44(+)_CTCGAATAAAAACTGCAGCC	>CD44(+)_CTCGAATAAAAACTGCAGCCAACTTCCGAGGCAGCCTCATTGCCCAGC	>CD44(+)_CAACTTCCGAGGCAGCCTCATTGCCCAGC
chr6	1312097	1312098	FOXQ1	219	+	154	247	401	200	132	12	13	25	35	16	11	>FOXQ1(+)_GCCGCAGGGTTATATTGGGC	>FOXQ1(+)_GCCGCAGGGTTATATTGGGCCGGCCCGAAGGTGGAGGCGAGACGCAGC	>FOXQ1(+)_CCGGCCCGAAGGTGGAGGCGAGACGCAGC
chr1	6554512	6554513	NOL9	159	-	301	98	399	10	301	21	4	25	3	8	2	>NOL9(-)_CCGACGGGATCTCGCGAGAT	>NOL9(-)_CCGACGGGATCTCGCGAGATTCTCGCGCGGTAGGCCCTGAGGACCCAG	>NOL9(-)_TTCTCGCGCGGTAGGCCCTGAGGACCCAG
chr22	36507039	36507040	FOXRED2	208	-	308	90	398	16	136	20	5	25	7	14	23	>FOXRED2(-)_AGCCGCCGCGGAGCAAGCGA	>FOXRED2(-)_AGCCGCCGCGGAGCAAGCGAGCCAAGCGCGGCCTCATTAGACCACGGG	>FOXRED2(-)_AGCCAAGCGCGGCCTCATTAGACCACGGG
chr11	113875532	113875533	USP28	140	-	354	43	397	21	224	24	1	25	7	4	0	>USP28(-)_TAGTCCTGAGAGGCTGGGCC	>USP28(-)_TAGTCCTGAGAGGCTGGGCCGGCGGCGGCTGCGGCGGGAGACCGGTGA	>USP28(-)_CGGCGGCGGCTGCGGCGGGAGACCGGTGA
chr8	93741029	93741030	RBM12B	83	-	209	187	396	4	215	20	5	25	0	5	0	>RBM12B(-)_AAGCTTGGTGGTGGGTTGCG	>RBM12B(-)_AAGCTTGGTGGTGGGTTGCGCCTGCAGAGCGCATGGGCAGATAAACCG	>RBM12B(-)_GCCTGCAGAGCGCATGGGCAGATAAACCG
chr1	42766985	42766986	P3H1	87	-	209	186	395	24	159	17	8	25	5	16	8	>P3H1(-)_GACTCCGGCCTTGGTGGCGG	>P3H1(-)_GACTCCGGCCTTGGTGGCGGGTGGCTGGCGGTTCCGTTAGGTCTGAGG	>P3H1(-)_GGTGGCTGGCGGTTCCGTTAGGTCTGAGG
chr17	30116828	30116829	NSRP1	185	+	223	172	395	19	164	21	4	25	10	12	14	>NSRP1(+)_TCGGCGTCAGCGTCACGGAG	>NSRP1(+)_TCGGCGTCAGCGTCACGGAGGCGTCGGCCACGTTCAGCGGACACGGGA	>NSRP1(+)_GGCGTCGGCCACGTTCAGCGGACACGGGA
chr4	37826717	37826718	PGM2	156	+	285	107	392	38	203	17	8	25	9	15	5	>PGM2(+)_GAAGGCAGATCTCACCGCCT	>PGM2(+)_GAAGGCAGATCTCACCGCCTGCTTCCCTCTGCAGCGGTAGCACAAGCT	>PGM2(+)_TGCTTCCCTCTGCAGCGGTAGCACAAGCT
chr14	34630153	34630154	SNX6	45	-	276	113	389	10	138	19	6	25	2	8	4	>SNX6(-)_GCCCCGCTCCTGGCCGCCGG	>SNX6(-)_GCCCCGCTCCTGGCCGCCGGCTCCCTCCGGCAGCAGGGAGATGCGCGC	>SNX6(-)_GCTCCCTCCGGCAGCAGGGAGATGCGCGC
chr11	70270735	70270736	PPFIA1	868	+	318	71	389	8	109	22	3	25	11	19	0	>PPFIA1(+)_GCGCCGCGCAGCCGGGCCCG	>PPFIA1(+)_GCGCCGCGCAGCCGGGCCCGCTCCTCCTCCGCTCCGCCAGTGTCCGGC	>PPFIA1(+)_GCTCCTCCTCCGCTCCGCCAGTGTCCGGC
chr11	64226280	64226281	NUDT22	79	+	318	70	388	1	202	22	3	25	0	1	2	>NUDT22(+)_GGGGCGGGCACTTCCGCTTC	>NUDT22(+)_GGGGCGGGCACTTCCGCTTCGGGGAAGGGGCGGAGCCTGAGGGACCCG	>NUDT22(+)_CGGGGAAGGGGCGGAGCCTGAGGGACCCG
chr12	117190470	117190471	FBXO21	284	-	245	140	385	47	152	18	7	25	12	10	9	>FBXO21(-)_CGCCCGGGCACTCTCGCACG	>FBXO21(-)_CGCCCGGGCACTCTCGCACGCGCGCGCGCGGCGGCCCCAGGTACGCGG	>FBXO21(-)_GCGCGCGCGCGGCGGCCCCAGGTACGCGG
chr15	42548837	42548838	HAUS2	262	+	309	76	385	4	188	23	2	25	1	4	8	>HAUS2(+)_ATCGAGCCGCGCCGTGCGTT	>HAUS2(+)_ATCGAGCCGCGCCGTGCGTTCGCCCTGCGATCCCGCTCACTCTTGGCG	>HAUS2(+)_TCGCCCTGCGATCCCGCTCACTCTTGGCG
chr12	105107730	105107731	WASHC4	181	+	238	141	379	5	133	18	7	25	8	1	3	>WASHC4(+)_CGGAGGCGGGGCCGGGGCCG	>WASHC4(+)_CGGAGGCGGGGCCGGGGCCGGAAGTCACGTGCTGTGACAGTAGCTGGG	>WASHC4(+)_GGAAGTCACGTGCTGTGACAGTAGCTGGG
chr4	10457411	10457412	ZNF518B	26	-	304	75	379	0	213	21	4	25	3	2	4	>ZNF518B(-)_ATTGCGCACGCGCGGGGCTG	>ZNF518B(-)_ATTGCGCACGCGCGGGGCTGGCGCGGGCTCCGCCCCCCGGGTAGGGAC	>ZNF518B(-)_GGCGCGGGCTCCGCCCCCCGGGTAGGGAC
chr5	16936264	16936265	MYO10	145	-	219	158	377	32	175	21	4	25	4	1	3	>MYO10(-)_AGGTCGCTGGGCTGTAGTCC	>MYO10(-)_AGGTCGCTGGGCTGTAGTCCCGCGGGCGAGAGCTGGCTGAGCCGCGGC	>MYO10(-)_CCGCGGGCGAGAGCTGGCTGAGCCGCGGC
chr20	17570103	17570104	DSTN	75	+	260	115	375	26	154	20	5	25	3	11	12	>DSTN(+)_GGCGCGCCCGCCCCGGGGTA	>DSTN(+)_GGCGCGCCCGCCCCGGGGTAAGCTCGCGCCGCCGCGTCAGCTCAGCGC	>DSTN(+)_AAGCTCGCGCCGCCGCGTCAGCTCAGCGC
chr7	2555523	2555524	BRAT1	76	-	318	57	375	2	216	21	4	25	1	2	6	>BRAT1(-)_CGGGCCTGGCAGGTGGCACT	>BRAT1(-)_CGGGCCTGGCAGGTGGCACTGTCCGGAGGCGGAGCCTTGGGCGAGGGG	>BRAT1(-)_TGTCCGGAGGCGGAGCCTTGGGCGAGGGG
chr17	51120864	51120865	SPAG9	374	-	252	122	374	131	174	22	3	25	47	10	5	>SPAG9(-)_CGGATGACGTGTGGCGCGCG	>SPAG9(-)_CGGATGACGTGTGGCGCGCGCGGCCGGGCCGCCCCGGCAGTTGGTGCA	>SPAG9(-)_GCGGCCGGGCCGCCCCGGCAGTTGGTGCA
chr10	96832297	96832298	LCOR	132	+	307	67	374	7	165	25	0	25	7	6	10	>LCOR(+)_GCGCGGGGCCGCGGCGGAGG	>LCOR(+)_GCGCGGGGCCGCGGCGGAGGCTGGGCCGGGCGGGCGGCAGAAGATGGC	>LCOR(+)_GCTGGGCCGGGCGGGCGGCAGAAGATGGC
chr3	156555116	156555117	SSR3	78	-	249	122	371	52	221	21	4	25	12	20	14	>SSR3(-)_AGTCAAGGGCCTTTGCCCGC	>SSR3(-)_AGTCAAGGGCCTTTGCCCGCCTTGGCGGCCGGCTCTACGTTCCCTGTT	>SSR3(-)_CCTTGGCGGCCGGCTCTACGTTCCCTGTT
chr4	165112859	165112860	TMEM192	123	-	295	74	369	16	241	21	4	25	3	2	3	>TMEM192(-)_AGGAGGGGGTGTGTCTGGGG	>TMEM192(-)_AGGAGGGGGTGTGTCTGGGGAGGGGCCTGGCAGGTCCCAGAAGGTGGC	>TMEM192(-)_GAGGGGCCTGGCAGGTCCCAGAAGGTGGC
chr17	79074938	79074939	ENGASE	153	+	267	102	369	10	171	22	3	25	33	10	13	>ENGASE(+)_GGGCCCGGGCCTGCGATTGC	>ENGASE(+)_GGGCCCGGGCCTGCGATTGCCTCTCGGCGTGCGCGGACAGTGTCATGG	>ENGASE(+)_CCTCTCGGCGTGCGCGGACAGTGTCATGG
chr2	86623832	86623833	RNF103	357	-	239	127	366	104	171	18	7	25	19	15	6	>RNF103(-)_TCAGTTGTTATGTCTCGGCT	>RNF103(-)_TCAGTTGTTATGTCTCGGCTCCGGCCGCGGCCGCCGCTGATACACGGT	>RNF103(-)_TCCGGCCGCGGCCGCCGCTGATACACGGT
chr2	86623832	86623833	RNF103-CHMP3	357	-	239	127	366	104	171	18	7	25	19	15	6	>RNF103-CHMP3(-)_TCAGTTGTTATGTCTCGGCT	>RNF103-CHMP3(-)_TCAGTTGTTATGTCTCGGCTCCGGCCGCGGCCGCCGCTGATACACGGT	>RNF103-CHMP3(-)_TCCGGCCGCGGCCGCCGCTGATACACGGT
chr16	57186364	57186365	RSPRY1	68	+	326	38	364	30	209	24	1	25	2	4	3	>RSPRY1(+)_GGCTCTGCGCGTAATGGCAG	>RSPRY1(+)_GGCTCTGCGCGTAATGGCAGCGCCGTGGCCTCGCGTCCATCTTTGCCG	>RSPRY1(+)_GCGCCGTGGCCTCGCGTCCATCTTTGCCG
chr2	9843493	9843494	TAF1B	66	+	319	42	361	0	174	23	2	25	0	1	0	>TAF1B(+)_GCCGGAAGCTTCTCCAGCCT	>TAF1B(+)_GCCGGAAGCTTCTCCAGCCTTTCCCGGAAGCTGCGCTCGCTACCCGGG	>TAF1B(+)_TTTCCCGGAAGCTGCGCTCGCTACCCGGG
chr8	81112067	81112068	PAG1	1514	-	217	142	359	5	181	22	3	25	8	2	2	>PAG1(-)_CCCGCTCCCCGCGCGGCTGC	>PAG1(-)_CCCGCTCCCCGCGCGGCTGCTCCGCCTCGGCGCCTGTCATTCTCCGCG	>PAG1(-)_CTCCGCCTCGGCGCCTGTCATTCTCCGCG
chr17	82037696	82037697	DCXR	149	-	212	144	356	187	211	22	3	25	18	53	7	>DCXR(-)_GCCAGAGCTTCAAGTTCCGC	>DCXR(-)_GCCAGAGCTTCAAGTTCCGCAGCCCCAGTGCGGAGGGCGGAGACTGCG	>DCXR(-)_CAGCCCCAGTGCGGAGGGCGGAGACTGCG
chr3	58433828	58433829	PDHB	97	-	209	147	356	23	231	16	9	25	7	7	2	>PDHB(-)_GCTCACGTCTGCCGGCCCCT	>PDHB(-)_GCTCACGTCTGCCGGCCCCTCTGTTGTCGTTTGGCAGCGGATAGAGGA	>PDHB(-)_TCTGTTGTCGTTTGGCAGCGGATAGAGGA
chr17	59106752	59106753	TRIM37	130	-	305	48	353	16	113	21	4	25	5	4	3	>TRIM37(-)_CGTCAGTTCCATAGGCGCGC	>TRIM37(-)_CGTCAGTTCCATAGGCGCGCGCCCGCGTCACGTGGGCCGAGGTTCCGG	>TRIM37(-)_CGCCCGCGTCACGTGGGCCGAGGTTCCGG
chr10	72692142	72692143	MCU	393	+	263	89	352	144	163	22	3	25	35	57	29	>MCU(+)_TGGCCGTCCGCTGCGCTGCC	>MCU(+)_TGGCCGTCCGCTGCGCTGCCTGGGTCGGCGCCGTTTCCAGTTGAGAGA	>MCU(+)_CTGGGTCGGCGCCGTTTCCAGTTGAGAGA
chr12	69470390	69470391	FRS2	177	+	200	151	351	5	256	23	2	25	8	1	4	>FRS2(+)_CCCTTCCCTCCCCCGCTCCC	>FRS2(+)_CCCTTCCCTCCCCCGCTCCCCCGGAAGTGCTTTTCCAAGATTCGGGCC	>FRS2(+)_CCCGGAAGTGCTTTTCCAAGATTCGGGCC
chr21	36990180	36990181	HLCS	58	-	343	8	351	1	205	25	0	25	0	5	5	>HLCS(-)_GGCGCGGCAGGGATTCGCGG	>HLCS(-)_GGCGCGGCAGGGATTCGCGGGCGACCACCCGGCGCAGGAGCGGCCGCG	>HLCS(-)_GGCGACCACCCGGCGCAGGAGCGGCCGCG
chr3	48847803	48847804	PRKAR2A	132	-	285	64	349	20	152	22	3	25	5	6	13	>PRKAR2A(-)_CGCCTGCCCGTCGGTCCCCG	>PRKAR2A(-)_CGCCTGCCCGTCGGTCCCCGCGGCGGCGGCGGCTGCCCAGTGACAGCG	>PRKAR2A(-)_GCGGCGGCGGCGGCTGCCCAGTGACAGCG
chr5	56909626	56909627	SETD9	8	+	319	29	348	2	187	25	0	25	0	3	1	>SETD9(+)_CCGAGGCCTCGATCCGCCTT	>SETD9(+)_CCGAGGCCTCGATCCGCCTTCCCCGCGCCGTCCTGGTCACGGCCCCGC	>SETD9(+)_TCCCCGCGCCGTCCTGGTCACGGCCCCGC
chr11	910801	910802	CHID1	338	-	315	31	346	15	229	24	1	25	5	6	3	>CHID1(-)_ACTTCCGGCGCGCTGGAGCG	>CHID1(-)_ACTTCCGGCGCGCTGGAGCGTTTTCCGGCCGTGCGTTTGTGGCCGTCC	>CHID1(-)_GTTTTCCGGCCGTGCGTTTGTGGCCGTCC
chr3	141738324	141738325	RNF7	31	+	300	45	345	19	174	23	2	25	4	11	14	>RNF7(+)_TAGCCTTCCGCCTTCCCCAA	>RNF7(+)_TAGCCTTCCGCCTTCCCCAAGCCAACGTCTCCGCCGTCGGCTCCGCGG	>RNF7(+)_AGCCAACGTCTCCGCCGTCGGCTCCGCGG
chr10	125719702	125719703	EDRF1	117	+	265	79	344	24	183	24	1	25	6	14	3	>EDRF1(+)_ATGGCGAGTCACAGCTACTT	>EDRF1(+)_ATGGCGAGTCACAGCTACTTCTTCCTGGCAGAGACCGGAAGTGCGGTC	>EDRF1(+)_TCTTCCTGGCAGAGACCGGAAGTGCGGTC
chr5	56815568	56815569	MAP3K1	76	+	284	60	344	5	178	22	3	25	2	7	4	>MAP3K1(+)_CCCTCCCTCGCAGGGGCCGA	>MAP3K1(+)_CCCTCCCTCGCAGGGGCCGAGCGAATGTAGCCCGCGAGAGAAAATGGC	>MAP3K1(+)_AGCGAATGTAGCCCGCGAGAGAAAATGGC
chr16	84145155	84145156	HSDL1	420	-	229	112	341	13	133	21	4	25	6	4	4	>HSDL1(-)_GCGCGTACGCGGGTCACGTG	>HSDL1(-)_GCGCGTACGCGGGTCACGTGAGGGCGCGGCGCGGCAGCAGCTCCGGCG	>HSDL1(-)_GAGGGCGCGGCGCGGCAGCAGCTCCGGCG
chr3	67654588	67654589	SUCLG2	76	-	253	87	340	19	231	25	0	25	5	10	16	>SUCLG2(-)_CGCGCCCGCCCTACTGCCCC	>SUCLG2(-)_CGCGCCCGCCCTACTGCCCCGTGCCGAGTTTCCTGTTTAAGATGGCGT	>SUCLG2(-)_CGTGCCGAGTTTCCTGTTTAAGATGGCGT
chr2	186590068	186590069	ITGAV	245	+	242	97	339	20	204	21	4	25	6	10	5	>ITGAV(+)_CCTGAGGTGCGGCGCTCACC	>ITGAV(+)_CCTGAGGTGCGGCGCTCACCCCGGCAGTCCCCAGCCTCAGACGCTGCG	>ITGAV(+)_CCCGGCAGTCCCCAGCCTCAGACGCTGCG
chr19	52570286	52570287	ZNF701	287	+	142	195	337	78	135	14	11	25	9	9	1	>ZNF701(+)_CCAGGCCTGGCTTTAGTCCT	>ZNF701(+)_CCAGGCCTGGCTTTAGTCCTGTGCGCACACATCCGCGCAGACCAGGAA	>ZNF701(+)_TGTGCGCACACATCCGCGCAGACCAGGAA
chr19	10333528	10333529	RAVER1	208	-	235	101	336	68	224	23	2	25	20	12	13	>RAVER1(-)_TGCCGCTCTATGCCGCTCCG	>RAVER1(-)_TGCCGCTCTATGCCGCTCCGCCCCGGCTCGCTGGTCCCAGAAGGCGCC	>RAVER1(-)_GCCCCGGCTCGCTGGTCCCAGAAGGCGCC
chr7	5513796	5513797	FBXL18	26	-	274	58	332	3	211	20	5	25	6	2	2	>FBXL18(-)_AACGGAAGTGCGTGTAGGCG	>FBXL18(-)_AACGGAAGTGCGTGTAGGCGGGCGCCGGAAGTGACGAGAGCCCGCTCC	>FBXL18(-)_GGGCGCCGGAAGTGACGAGAGCCCGCTCC
chr14	67360347	67360348	EIF2S1	34	+	222	109	331	8	195	24	1	25	5	4	5	>EIF2S1(+)_CATGCGAGGAGGTTCCGCAT	>EIF2S1(+)_CATGCGAGGAGGTTCCGCATGCGCGGTGGAGTGAGCGAAGCGCACGCT	>EIF2S1(+)_TGCGCGGTGGAGTGAGCGAAGCGCACGCT
chr7	75073763	75073764	RCC1L	63	-	290	40	330	69	164	24	1	25	19	35	19	>RCC1L(-)_AGGACTGGTGTTAAGGGTCA	>RCC1L(-)_AGGACTGGTGTTAAGGGTCACGCAAGATGGCGGCGCCCAGAGGCTGCT	>RCC1L(-)_ACGCAAGATGGCGGCGCCCAGAGGCTGCT
chr20	33401518	33401519	CDK5RAP1	57	-	247	83	330	12	259	22	3	25	5	7	0	>CDK5RAP1(-)_TGACCCGGCCTGAAGTAGCG	>CDK5RAP1(-)_TGACCCGGCCTGAAGTAGCGGCGGAACGGAAGTCGCTTGTGTATGAAC	>CDK5RAP1(-)_GGCGGAACGGAAGTCGCTTGTGTATGAAC
chr17	75261914	75261915	MRPS7	30	+	274	53	327	10	160	22	3	25	3	8	8	>MRPS7(+)_GTGGGGTCCTCGTGGCCAGC	>MRPS7(+)_GTGGGGTCCTCGTGGCCAGCCAAGATGGCTGCCCCCGCAGTGAAGGTT	>MRPS7(+)_CCAAGATGGCTGCCCCCGCAGTGAAGGTT
chr6	149749742	149749743	PCMT1	149	+	208	118	326	9	133	21	4	25	4	1	4	>PCMT1(+)_AGAGCGCATGCGTGCCGCGG	>PCMT1(+)_AGAGCGCATGCGTGCCGCGGGGGATGCCGGGAGCGCGCAGTGGCGGCA	>PCMT1(+)_GGGGATGCCGGGAGCGCGCAGTGGCGGCA
chr3	3179690	3179691	CRBN	524	-	269	56	325	11	257	24	1	25	7	12	0	>CRBN(-)_TCGGCACCGCCCTGTCCCAG	>CRBN(-)_TCGGCACCGCCCTGTCCCAGCCTCCTTTGCGGGTAAACAGACATGGCC	>CRBN(-)_GCCTCCTTTGCGGGTAAACAGACATGGCC
chr16	1351930	1351931	GNPTG	41	+	303	22	325	4	226	24	1	25	3	0	0	>GNPTG(+)_CGGACGCCACTTCCGGTCCC	>GNPTG(+)_CGGACGCCACTTCCGGTCCCCGTGGTCACGTGACCGTCACTTCACGTG	>GNPTG(+)_CCGTGGTCACGTGACCGTCACTTCACGTG
chr12	88035507	88035508	C12orf29	91	+	262	61	323	6	152	21	4	25	2	5	2	>C12orf29(+)_CTTCTGGACGGGCGTTCCCG	>C12orf29(+)_CTTCTGGACGGGCGTTCCCGCCCCTCGCTGGGCTTGGTAGTTGGGGCG	>C12orf29(+)_GCCCCTCGCTGGGCTTGGTAGTTGGGGCG
chr7	92447501	92447502	GATAD1	208	+	275	48	323	5	183	23	2	25	6	5	10	>GATAD1(+)_CCCACCCCGGCCAGATCCCT	>GATAD1(+)_CCCACCCCGGCCAGATCCCTTTCCCAGTCCTGCTTCCCAGTGCCTCGG	>GATAD1(+)_TTTCCCAGTCCTGCTTCCCAGTGCCTCGG
chr4	6269890	6269891	WFS1	164	+	223	96	319	31	142	20	5	25	9	5	9	>WFS1(+)_CAGAAGGCCGCGCTAGCCGG	>WFS1(+)_CAGAAGGCCGCGCTAGCCGGCTCTTCAGCAGCGAGTGCAGATTGCTCC	>WFS1(+)_GCTCTTCAGCAGCGAGTGCAGATTGCTCC
chr22	38872215	38872216	CBX6	95	-	254	65	319	27	136	21	4	25	15	13	4	>CBX6(-)_CGAGCGGTGCCGCACCGGCC	>CBX6(-)_CGAGCGGTGCCGCACCGGCCGCGGGCGCAGGGAGTATTATGGGCTGTG	>CBX6(-)_CGCGGGCGCAGGGAGTATTATGGGCTGTG
chr2	219498900	219498901	GMPPA	79	+	206	110	316	12	202	23	2	25	16	4	2	>GMPPA(+)_GCGACTTGCGAGAAGACACG	>GMPPA(+)_GCGACTTGCGAGAAGACACGTGCGCGGAAGGAGCTTGCAGTAGCGGGC	>GMPPA(+)_GTGCGCGGAAGGAGCTTGCAGTAGCGGGC
chr2	219229587	219229588	ATG9A	86	-	267	48	315	12	223	22	3	25	3	5	3	>ATG9A(-)_CACCCGGCCTAGCGCCGCGG	>ATG9A(-)_CACCCGGCCTAGCGCCGCGGGTCGCGCCGAGCCGAGCCGAGCCGAGCG	>ATG9A(-)_GGTCGCGCCGAGCCGAGCCGAGCCGAGCG
chr9	37800796	37800797	DCAF10	144	+	227	88	315	8	172	18	7	25	0	5	10	>DCAF10(+)_CAGCCGGTGGGGTTAGGCCG	>DCAF10(+)_CAGCCGGTGGGGTTAGGCCGCTGCACGCCGGAAGTGGCAGCTGAACAG	>DCAF10(+)_GCTGCACGCCGGAAGTGGCAGCTGAACAG
chr8	144103734	144103735	SHARPIN	20	-	276	39	315	0	146	21	4	25	1	0	3	>SHARPIN(-)_GGGACCCGGCCGGACCGGAG	>SHARPIN(-)_GGGACCCGGCCGGACCGGAGATGGCGCCGCCAGCGGGCGGGGCGGCGG	>SHARPIN(-)_GATGGCGCCGCCAGCGGGCGGGGCGGCGG
chr7	151519652	151519653	RHEB	43	-	257	57	314	6	97	24	1	25	1	8	2	>RHEB(-)_CGCGCGGTCGGTTCCGGGCG	>RHEB(-)_CGCGCGGTCGGTTCCGGGCGGTTGGGAGCGCGCGAGCTAGCGAGCGAG	>RHEB(-)_GGTTGGGAGCGCGCGAGCTAGCGAGCGAG
chr7	30594921	30594922	GARS	50	+	232	80	312	50	133	19	6	25	10	17	10	>GARS(+)_GTCGCCACCCTCTCTGGACA	>GARS(+)_GTCGCCACCCTCTCTGGACAGCCCAGGGCCGCAGGCTCATGCCCTCTC	>GARS(+)_AGCCCAGGGCCGCAGGCTCATGCCCTCTC
chr5	65925779	65925780	ERBIN	86	+	250	60	310	76	137	20	5	25	14	4	7	>ERBIN(+)_CGCGCAGCCTCTTCACCCGT	>ERBIN(+)_CGCGCAGCCTCTTCACCCGTCGCGGCCGGGGCGGTGGCGCTGTTGCCG	>ERBIN(+)_TCGCGGCCGGGGCGGTGGCGCTGTTGCCG
chr1	179882296	179882297	TOR1AIP1	144	+	274	36	310	9	144	25	0	25	5	10	11	>TOR1AIP1(+)_TCCACAGCAGCTGACCCAGC	>TOR1AIP1(+)_TCCACAGCAGCTGACCCAGCTCAGGCACTGCCTCTCTCACAGCCCTCA	>TOR1AIP1(+)_CTCAGGCACTGCCTCTCTCACAGCCCTCA
chr2	120223379	120223380	TMEM185B	46	-	258	51	309	21	196	21	4	25	3	24	7	>TMEM185B(-)_CAGGGAGGATGTGAGCTCAC	>TMEM185B(-)_CAGGGAGGATGTGAGCTCACTCCCGCCTCCATGTTCCCGGAGTCGCCT	>TMEM185B(-)_CTCCCGCCTCCATGTTCCCGGAGTCGCCT
chr17	39461485	39461486	CDK12	77	+	247	59	306	8	193	22	3	25	3	9	7	>CDK12(+)_TCGCGACGATTTCTGGGATT	>CDK12(+)_TCGCGACGATTTCTGGGATTGCCCCTCCCCCCTTCCCCAAGTGCCGTT	>CDK12(+)_TGCCCCTCCCCCCTTCCCCAAGTGCCGTT
chr19	8514166	8514167	ZNF414	70	-	262	44	306	1	224	23	2	25	3	0	1	>ZNF414(-)_CTCCGAGCGCCCTGCGCAGG	>ZNF414(-)_CTCCGAGCGCCCTGCGCAGGCCCCGCCCCCAGTCTCGCGAGAGCTGAG	>ZNF414(-)_GCCCCGCCCCCAGTCTCGCGAGAGCTGAG
chr1	70354721	70354722	ANKRD13C	84	-	221	82	303	3	252	21	4	25	3	2	7	>ANKRD13C(-)_TTTCTCTCTCTTCACTCCTG	>ANKRD13C(-)_TTTCTCTCTCTTCACTCCTGGGGGAGCTCTCGCGAGAGGAGCAAGAGG	>ANKRD13C(-)_GGGGGAGCTCTCGCGAGAGGAGCAAGAGG
[truncated: 10,281 more rows]

## Sheet: Exp5 Host Features
Chromosome	MaxTSS S	MaxTSS E	Genename	Strength	Strand	Abutted: Pol II	Free: Pol II	Engaged: Pol II	TBP PIC: TBP	Nuc1: H3K4me3	Abutted: Ser5P	Free: Ser5P	Engaged: Ser5P	TBP PIC: Ser5P	PIC +1 Nuc: TBP	PIC +1 Nuc: Ser5P
[truncated: 12,229 more rows]

[truncated: 12 more sheets: Exp4 TB40e Features, Exp5 Towne Features (UL87 exp4), Exp4 Host Percent Free, Exp4 TB40e Percent Free, Exp 5 Host Percent Free, Exp5 Towne Percent Free, Exp4 Host +1 Nuc, Exp4 TB40e +1 Nuc, Exp4 TBP vs UL87, HeatMap Timecourse data, PFA Sensitivity Graph, UL87 Dependency Graph]
